# Supplementary material
Source: publisher figshare collection journal article supplement (https://gsajournals.figshare.com/ndownloader/files/21966375)
Supplement: Supplementary file 1 [file 21966375]

## Sheet: Sheet1
Feature	Locus	Gene Name	Aliases	Assigned Function	D6_L4440 - L4_L4440 log FC	Avg. Expression	lfc SE	wald stat	p-value	q-value
RCEA012607	BX284602	skr-15	CCD64807.1, CELE_F54D10.1, EnsemblGenomes-Gn:WBGene00004821, EnsemblGenomes-Tr:F54D10.1, GI:351050265, GOA:G5EE88, InterPro:IPR001232, InterPro:IPR011333, InterPro:IPR016072, InterPro:IPR016073, InterPro:IPR016897, skr-15, UniProtKB/TrEMBL:G5EE88, WormBase:WBGene00004821		9.00568	139.341	1.51036	5.96261	2.48236e-09	3.63205e-08
RCEA089337	BX284606	meg-4	CCD66880.1, CELE_C36C9.1, EnsemblGenomes-Gn:WBGene00016485, EnsemblGenomes-Tr:C36C9.1, GI:351059018, GOA:Q9TZK8, meg-4, UniProtKB/TrEMBL:Q9TZK8, WormBase:WBGene00016485		8.82481	248.639	1.29338	6.82307	8.91173e-12	2.21472e-10
RCEA010493	BX284602	T13B5.9	CCD63492.2, CELE_T13B5.9, EnsemblGenomes-Gn:WBGene00020476, EnsemblGenomes-Tr:T13B5.9, GI:969855416, GOA:Q965L2, InterPro:IPR001577, T13B5.9, UniProtKB/TrEMBL:Q965L2, WormBase:WBGene00020476		8.67267	77.9064	1.62322	5.34289	9.1477e-08	9.40648e-07
RCEA090620	BX284606	dhs-26	CCD69241.1, CELE_ZK816.5, dhs-26, EnsemblGenomes-Gn:WBGene00000989, EnsemblGenomes-Tr:ZK816.5, GI:351061472, GOA:Q23612, InterPro:IPR002198, InterPro:IPR002347, InterPro:IPR016040, InterPro:IPR020904, UniProtKB/TrEMBL:Q23612, WormBase:WBGene00000989	Oxidoreductase (EC 1.1.1.-)	8.55513	47.2959	1.61886	5.28466	1.25936e-07	1.26481e-06
RCEA046422	BX284604	C08F11.12	C08F11.12, CAB62779.1, CELE_C08F11.12, EnsemblGenomes-Gn:WBGene00007459, EnsemblGenomes-Tr:C08F11.12.1, EnsemblGenomes-Tr:C08F11.12.2, GI:6562344, WormBase:WBGene00007459		8.51456	181.876	1.32239	6.43876	1.20455e-10	2.35676e-09
RCEA042597	BX284604	cav-1	CAB03359.1, cav-1, CELE_T13F2.8, EnsemblGenomes-Gn:WBGene00000301, EnsemblGenomes-Tr:T13F2.8a, EnsemblGenomes-Tr:T13F2.8c, GI:3879835, WormBase:WBGene00000301		8.38848	709.926	0.849189	9.87822	5.17413e-23	1.11502e-20
RCEA099587	BX284606	rgs-11	CAB05728.1, CELE_F45B8.1, EnsemblGenomes-Gn:WBGene00004354, EnsemblGenomes-Tr:F45B8.1, GI:3877146, rgs-11, WormBase:WBGene00004354	Hypothetical protein	8.32964	84.7661	1.52423	5.46482	4.63387e-08	5.11353e-07
RCEA045109	BX284604	thn-1	CAA94598.1, CELE_F28D1.3, EnsemblGenomes-Gn:WBGene00009213, EnsemblGenomes-Tr:F28D1.3, GI:3876371, GOA:Q19874, InterPro:IPR001938, thn-1, UniProtKB/TrEMBL:Q19874, WormBase:WBGene00009213		8.30465	188.307	1.39568	5.95024	2.67748e-09	3.88363e-08
RCEA025682	BX284603	numr-1	CCD69062.1, CELE_F08F8.5, EnsemblGenomes-Gn:WBGene00017270, EnsemblGenomes-Tr:F08F8.5, GI:351061283, GOA:Q19208, numr-1, UniProtKB/TrEMBL:Q19208, WormBase:WBGene00017270		8.26495	342.438	1.3768	6.00303	1.93665e-09	2.89251e-08
RCEA082665	BX284605	F35E12.2	CAB04270.2, CELE_F35E12.2, EnsemblGenomes-Gn:WBGene00009426, EnsemblGenomes-Tr:F35E12.2a, F35E12.2, GI:157888579, GOA:O02355, InterPro:IPR003366, UniProtKB/TrEMBL:O02355, WormBase:WBGene00009426		8.25665	67.2776	1.51788	5.43958	5.34064e-08	5.77931e-07
RCEA021568	BX284603	T24C4.2	CCD69956.1, CELE_T24C4.2, EnsemblGenomes-Gn:WBGene00020758, EnsemblGenomes-Tr:T24C4.2, GI:351062073, T24C4.2, UniProtKB/TrEMBL:Q9TZ37, WormBase:WBGene00020758		8.22243	79.2412	1.53389	5.36053	8.29799e-08	8.6545e-07
RCEA006909	BX284601	C35E7.5	C35E7.5, CCD66811.1, CELE_C35E7.5, EnsemblGenomes-Gn:WBGene00016457, EnsemblGenomes-Tr:C35E7.5a, GI:373219280, UniProtKB/TrEMBL:O61771, WormBase:WBGene00016457		8.2224	290.397	1.07262	7.6657	1.77865e-14	7.55801e-13
RCEA074380	BX284605	skr-14	CCD69378.1, CELE_Y47D7A.8, EnsemblGenomes-Gn:WBGene00004820, EnsemblGenomes-Tr:Y47D7A.8, GI:373254285, GOA:Q9N3U9, InterPro:IPR001232, InterPro:IPR011333, InterPro:IPR016072, InterPro:IPR016073, skr-14, UniProtKB/TrEMBL:Q9N3U9, WormBase:WBGene00004820		8.20847	62.5155	1.55383	5.28272	1.27278e-07	1.27659e-06
RCEA074766	BX284605	Y58A7A.4	CCD63023.1, CELE_Y58A7A.4, EnsemblGenomes-Gn:WBGene00021978, EnsemblGenomes-Tr:Y58A7A.4, GI:351021017, InterPro:IPR002867, UniProtKB/TrEMBL:Q966A5, WormBase:WBGene00021978, Y58A7A.4		8.07031	388.976	1.06292	7.59259	3.13583e-14	1.27849e-12
RCEA011973	BX284602	Y25C1A.14	CCD61993.1, CELE_Y25C1A.14, EnsemblGenomes-Gn:WBGene00194985, EnsemblGenomes-Tr:Y25C1A.14, GI:351018087, UniProtKB/TrEMBL:D3NQ92, WormBase:WBGene00194985, Y25C1A.14		8.04454	158.17	1.50072	5.36045	8.30167e-08	8.6545e-07
RCEA012227	BX284602	Y49F6C.8	CCD69503.1, CELE_Y49F6C.8, EnsemblGenomes-Gn:WBGene00021730, EnsemblGenomes-Tr:Y49F6C.8, GI:351061658, UniProtKB/TrEMBL:Q9TYJ3, WormBase:WBGene00021730, Y49F6C.8		7.96755	58.3188	1.57527	5.05791	4.23887e-07	3.72197e-06
RCEA085501	BX284605	T25E12.6	CAB04824.1, CELE_T25E12.6, EnsemblGenomes-Gn:WBGene00012021, EnsemblGenomes-Tr:T25E12.6, GI:3880228, InterPro:IPR002900, T25E12.6, UniProtKB/TrEMBL:O45820, WormBase:WBGene00012021		7.94948	56.933	1.53605	5.17528	2.27566e-07	2.14821e-06
RCEA042107	BX284604	flh-3	CAA21592.2, CELE_Y11D7A.13, EnsemblGenomes-Gn:WBGene00012436, EnsemblGenomes-Tr:Y11D7A.13, flh-3, GI:34555976, GOA:Q9XWQ6, InterPro:IPR007588, UniProtKB/TrEMBL:Q9XWQ6, WormBase:WBGene00012436		7.88504	64.266	1.56784	5.02923	4.92461e-07	4.2523e-06
RCEA056636	BX284604	clec-190	CAB70254.1, CELE_M199.4, clec-190, EnsemblGenomes-Gn:WBGene00010953, EnsemblGenomes-Tr:M199.4, GI:6782272, GOA:Q9NAP0, InterPro:IPR001304, InterPro:IPR016186, InterPro:IPR016187, UniProtKB/TrEMBL:Q9NAP0, WormBase:WBGene00010953		7.87892	41.0716	1.62883	4.83716	1.3171e-06	1.02468e-05
RCEA021941	BX284603	Y82E9BR.17	CCD73054.1, CELE_Y82E9BR.17, GI:373220364, InterPro:IPR015880, UniProtKB/TrEMBL:Q9BKR7, WormBase:WBGene00022349, Y82E9BR.17		7.86397	43.4309	1.80294	4.36174	1.29031e-05	7.79511e-05
RCEA003183	BX284601	nhr-2	CCD61911.1, CELE_C32F10.6, EnsemblGenomes-Gn:WBGene00003601, EnsemblGenomes-Tr:C32F10.6, GI:351065897, nhr-2, WormBase:WBGene00003601		7.85275	55.7524	1.53011	5.13214	2.86472e-07	2.64085e-06
RCEA097036	BX284606	spp-21	CAI91169.1, CELE_T25C12.4, EnsemblGenomes-Gn:WBGene00044284, EnsemblGenomes-Tr:T25C12.4, GI:62954610, InterPro:IPR008139, InterPro:IPR011001, spp-21, UniProtKB/TrEMBL:Q52GZ2, WormBase:WBGene00044284		7.83685	167.475	1.63225	4.80124	1.57687e-06	1.20258e-05
RCEA100869	BX284606	F39F10.3	CCD66182.1, CELE_F39F10.3, EnsemblGenomes-Gn:WBGene00018203, EnsemblGenomes-Tr:F39F10.3, F39F10.3, GI:351065041, GOA:Q20192, InterPro:IPR000719, InterPro:IPR008271, InterPro:IPR011009, InterPro:IPR017441, UniProtKB/TrEMBL:Q20192, WormBase:WBGene00018203		7.79826	64.3783	1.60814	4.84923	1.2394e-06	9.69726e-06
RCEA084862	BX284605	F14H3.3	CAB05482.2, CELE_F14H3.3, EnsemblGenomes-Gn:WBGene00008822, EnsemblGenomes-Tr:F14H3.3, F14H3.3, GI:5824455, UniProtKB/TrEMBL:O45362, WormBase:WBGene00008822		7.68156	45.6962	1.61217	4.76473	1.89107e-06	1.41432e-05
RCEA075555	BX284605	ceh-49	CCD69359.1, ceh-49, CELE_F17A9.6, EnsemblGenomes-Gn:WBGene00017538, EnsemblGenomes-Tr:F17A9.6, GI:373219674, GOA:O16218, InterPro:IPR001356, InterPro:IPR003350, InterPro:IPR009057, InterPro:IPR010982, UniProtKB/TrEMBL:O16218, WormBase:WBGene00017538		7.67228	59.8955	1.61455	4.75195	2.01462e-06	1.49862e-05
RCEA030449	BX284604	dsl-2	CCD74019.1, CELE_W09G12.1, dsl-2, EnsemblGenomes-Gn:WBGene00001104, EnsemblGenomes-Tr:W09G12.1, GI:373220536, GOA:O45203, InterPro:IPR001774, InterPro:IPR013032, UniProtKB/TrEMBL:O45203, WormBase:WBGene00001104		7.67005	46.4857	1.58925	4.82621	1.39155e-06	1.07594e-05
RCEA049800	BX284604	F02H6.4	CELE_F02H6.4, F02H6.4		7.65529	220.05	1.17143	6.53498	6.36161e-11	1.3182e-09
RCEA013793	BX284602	ZK177.1	CCD64855.2, CELE_ZK177.1, EnsemblGenomes-Gn:WBGene00022669, EnsemblGenomes-Tr:ZK177.1, GI:358246652, WormBase:WBGene00022669, ZK177.1		7.64346	44.1789	1.70337	4.48724	7.21501e-06	4.66917e-05
RCEA076846	BX284605	C50E3.11	C50E3.11, CCD67748.1, CELE_C50E3.11, EnsemblGenomes-Gn:WBGene00016822, EnsemblGenomes-Tr:C50E3.11, GI:351060130, UniProtKB/TrEMBL:A7LPD9, WormBase:WBGene00016822		7.6324	138.967	1.31375	5.80961	6.26193e-09	8.44912e-08
RCEA044992	BX284604	dnj-26	CAB60492.1, CELE_Y39C12A.8, dnj-26, EnsemblGenomes-Gn:WBGene00001044, EnsemblGenomes-Tr:Y39C12A.8, GI:6425300, GOA:Q9U2L4, InterPro:IPR001623, UniProtKB/TrEMBL:Q9U2L4, WormBase:WBGene00001044		7.55088	60.4364	1.71954	4.39121	1.12723e-05	6.90952e-05
RCEA095450	BX284606	B0416.4	B0416.4, CCD61922.1, CELE_B0416.4, EnsemblGenomes-Gn:WBGene00015180, EnsemblGenomes-Tr:B0416.4, GI:351065910, WormBase:WBGene00015180		7.54241	43.6536	1.63849	4.60327	4.15904e-06	2.87135e-05
RCEA031971	BX284604	F56D6.9	CCD70726.1, CELE_F56D6.9, EnsemblGenomes-Gn:WBGene00044471, EnsemblGenomes-Tr:F56D6.9, F56D6.9, GI:351062690, UniProtKB/TrEMBL:Q4R117, WormBase:WBGene00044471		7.53943	147.368	1.10095	6.84814	7.48158e-12	1.88099e-10
RCEA002850	BX284601	F48C1.9	CCD62475.1, CELE_F48C1.9, EnsemblGenomes-Gn:WBGene00018601, EnsemblGenomes-Tr:F48C1.9, F48C1.9, GI:351020492, UniProtKB/TrEMBL:Q8MPU7, WormBase:WBGene00018601		7.53756	111.64	1.3265	5.68229	1.32901e-08	1.67767e-07
RCEA089333	BX284606	fbxa-170	CCD66882.1, CELE_C36C9.3, EnsemblGenomes-Gn:WBGene00016486, EnsemblGenomes-Tr:C36C9.3, fbxa-170, GI:351059020, InterPro:IPR001810, InterPro:IPR002900, UniProtKB/TrEMBL:Q9TZK9, WormBase:WBGene00016486		7.52903	39.5034	1.55467	4.84285	1.27988e-06	9.97263e-06
RCEA010973	BX284602	ceh-83	CCD71265.1, ceh-83, CELE_F45C12.15, EnsemblGenomes-Gn:WBGene00018446, EnsemblGenomes-Tr:F45C12.15.1, EnsemblGenomes-Tr:F45C12.15.2, EnsemblGenomes-Tr:F45C12.15.3, GI:351063184, GOA:O16749, InterPro:IPR001356, InterPro:IPR009057, UniProtKB/TrEMBL:O16749, WormBase:WBGene00018446		7.51619	43.4835	1.57328	4.77741	1.77568e-06	1.33596e-05
RCEA008611	BX284601	sepa-1	CAB07643.1, CELE_M01E5.6, EnsemblGenomes-Gn:WBGene00010808, EnsemblGenomes-Tr:M01E5.6, GI:3878635, GOA:G5EC37, InterPro:IPR003101, sepa-1, UniProtKB/TrEMBL:G5EC37, WormBase:WBGene00010808		7.4649	36.3238	1.58803	4.70072	2.59246e-06	1.87925e-05
RCEA008574	BX284601	ZK1053.4	CAB04980.2, CELE_ZK1053.4, EnsemblGenomes-Gn:WBGene00014199, EnsemblGenomes-Tr:ZK1053.4, GI:919006380, GOA:O45995, UniProtKB/TrEMBL:O45995, WormBase:WBGene00014199, ZK1053.4		7.44925	97.3703	1.30012	5.72968	1.0062e-08	1.30962e-07
RCEA004815	BX284601	K04G2.10	CAB00047.1, CELE_K04G2.10, EnsemblGenomes-Gn:WBGene00010568, EnsemblGenomes-Tr:K04G2.10, GI:3878269, GOA:Q21229, K04G2.10, UniProtKB/TrEMBL:Q21229, WormBase:WBGene00010568		7.4475	36.2195	1.76781	4.21283	2.52189e-05	0.000140847
RCEA011022	BX284602	C08F1.10	C08F1.10, CCD63716.1, CELE_C08F1.10, EnsemblGenomes-Gn:WBGene00015613, EnsemblGenomes-Tr:C08F1.10, GI:351021417, GOA:Q8MXJ2, UniProtKB/TrEMBL:Q8MXJ2, WormBase:WBGene00015613		7.44669	37.2447	1.62282	4.58874	4.4592e-06	3.04376e-05
RCEA008055	BX284601	nlp-39	CAB05463.1, CELE_C54C8.9, EnsemblGenomes-Gn:WBGene00008295, EnsemblGenomes-Tr:C54C8.9, GI:3875212, GOA:O17707, nlp-39, UniProtKB/TrEMBL:O17707, WormBase:WBGene00008295		7.43595	77.4264	1.40917	5.27681	1.31451e-07	1.31146e-06
RCEA012486	BX284602	F40H7.12	CCD67496.1, CELE_F40H7.12, EnsemblGenomes-Gn:WBGene00044379, EnsemblGenomes-Tr:F40H7.12, F40H7.12, GI:351059908, InterPro:IPR008999, UniProtKB/TrEMBL:Q4W516, WormBase:WBGene00044379		7.31724	111.972	1.64636	4.4445	8.80962e-06	5.58375e-05
RCEA031975	BX284604	dct-8	CCD70727.1, CELE_F56D6.10, dct-8, EnsemblGenomes-Gn:WBGene00044472, EnsemblGenomes-Tr:F56D6.10, GI:351062691, UniProtKB/TrEMBL:Q4R116, WormBase:WBGene00044472		7.30342	147.002	1.01146	7.2207	5.17214e-13	1.60539e-11
RCEA013686	BX284602	EEED8.15	CCD68742.1, CELE_EEED8.15, EEED8.15, EnsemblGenomes-Gn:WBGene00017143, EnsemblGenomes-Tr:EEED8.15, GI:351060995, UniProtKB/TrEMBL:Q95QN5, WormBase:WBGene00017143		7.30102	35.6623	1.61188	4.52952	5.91176e-06	3.93032e-05
RCEA097322	BX284606	F54F7.9	CAM33504.2, CELE_F54F7.9, EnsemblGenomes-Gn:WBGene00045251, EnsemblGenomes-Tr:F54F7.9, F54F7.9, GI:152002990, UniProtKB/TrEMBL:A3FPK6, WormBase:WBGene00045251		7.27342	77.5207	1.54983	4.69303	2.69188e-06	1.94199e-05
RCEA093664	BX284606	hen-1	CCD66846.1, CELE_C36B7.7, EnsemblGenomes-Gn:WBGene00001841, EnsemblGenomes-Tr:C36B7.7, GI:373219305, GOA:G5ECA8, hen-1, InterPro:IPR002172, InterPro:IPR023415, UniProtKB/TrEMBL:G5ECA8, WormBase:WBGene00001841		7.26292	23.7735	1.75645	4.135	3.5495e-05	0.000190549
RCEA095469	BX284606	H29C22.1	CCD61928.1, CELE_H29C22.1, EnsemblGenomes-Gn:WBGene00045261, EnsemblGenomes-Tr:H29C22.1, GI:351018012, H29C22.1, UniProtKB/TrEMBL:A2V8C8, WormBase:WBGene00045261		7.22722	451.358	0.693332	10.4239	1.92887e-25	6.19085e-23
RCEA031973	BX284604	F56D6.8	CCD70725.1, CELE_F56D6.8, EnsemblGenomes-Gn:WBGene00044292, EnsemblGenomes-Tr:F56D6.8, F56D6.8, GI:351062689, UniProtKB/TrEMBL:Q4W4Z3, WormBase:WBGene00044292		7.21197	99.3358	1.18436	6.08932	1.13392e-09	1.79743e-08
RCEA007592	BX284601	T02G6.5	CBW48436.1, CELE_T02G6.5, GI:306438534, GOA:E1B6V8, InterPro:IPR001810, InterPro:IPR012885, T02G6.5, UniProtKB/TrEMBL:E1B6V8, WormBase:WBGene00011388	Hypothetical protein	7.20158	93.6191	1.28478	5.60528	2.07915e-08	2.51033e-07
RCEA090644	BX284606	cht-1	CCD63028.1, CELE_C04F6.3, cht-1, GI:373218754, WormBase:WBGene00000503	chitinase (EC 3.2.1.14)	7.19432	387.569	0.818893	8.78542	1.55781e-18	1.4844e-16
RCEA019701	BX284602	Y46G5A.8	CAB60353.1, CELE_Y46G5A.8, EnsemblGenomes-Gn:WBGene00012900, EnsemblGenomes-Tr:Y46G5A.8, GI:6425310, GOA:Q9U2F8, InterPro:IPR001810, UniProtKB/TrEMBL:Q9U2F8, WormBase:WBGene00012900, Y46G5A.8		7.16211	33.6329	1.62362	4.41119	1.02805e-05	6.3872e-05
RCEA011208	BX284602	bath-19	bath-19, CCD61292.1, CELE_F59H6.1, EnsemblGenomes-Gn:WBGene00019132, EnsemblGenomes-Tr:F59H6.1, GI:351065315, InterPro:IPR000210, InterPro:IPR002083, InterPro:IPR008974, InterPro:IPR011333, UniProtKB/TrEMBL:Q9N5P6, WormBase:WBGene00019132		7.16066	30.686	1.80159	3.97463	7.04882e-05	0.000347943
RCEA007083	BX284601	clec-97	CAB05016.3, CELE_ZK39.6, clec-97, EnsemblGenomes-Gn:WBGene00013931, EnsemblGenomes-Tr:ZK39.6, GI:38422244, GOA:Q9XUI4, InterPro:IPR001304, InterPro:IPR016186, InterPro:IPR016187, UniProtKB/TrEMBL:Q9XUI4, WormBase:WBGene00013931	Hypothetical protein	7.15103	96.608	1.24103	5.76218	8.30327e-09	1.09776e-07
RCEA086035	BX284605	fbxb-7	CAA16305.2, CELE_Y20C6A.2, EnsemblGenomes-Gn:WBGene00012492, EnsemblGenomes-Tr:Y20C6A.2, fbxb-7, GI:163263116, InterPro:IPR001810, InterPro:IPR012885, UniProtKB/TrEMBL:Q9XXS3, WormBase:WBGene00012492		7.14141	47.3494	1.58854	4.49557	6.93831e-06	4.51529e-05
RCEA074460	BX284605	F54D11.3	CCD71036.1, CELE_F54D11.3, EnsemblGenomes-Gn:WBGene00018813, EnsemblGenomes-Tr:F54D11.3, F54D11.3, GI:351062984, UniProtKB/TrEMBL:Q22994, WormBase:WBGene00018813		7.13167	48.1621	1.67034	4.2696	1.95821e-05	0.000113352
RCEA074382	BX284605	skr-7	CCD69372.1, CELE_Y47D7A.1, EnsemblGenomes-Gn:WBGene00004813, EnsemblGenomes-Tr:Y47D7A.1, GI:373254279, GOA:G5EDY3, InterPro:IPR001232, InterPro:IPR011333, InterPro:IPR016072, InterPro:IPR016073, InterPro:IPR016897, skr-7, UniProtKB/TrEMBL:G5EDY3, WormBase:WBGene00004813		7.12317	426.487	0.862273	8.26092	1.44556e-16	9.04827e-15
RCEA008631	BX284601	T04D3.5	CAB03287.1, CELE_T04D3.5, EnsemblGenomes-Gn:WBGene00011434, EnsemblGenomes-Tr:T04D3.5.1, EnsemblGenomes-Tr:T04D3.5.2, GI:3879435, T04D3.5, UniProtKB/TrEMBL:O02299, WormBase:WBGene00011434		7.12303	219.086	1.03045	6.91255	4.7603e-12	1.24002e-10
RCEA012446	BX284602	M151.3	CCD69707.2, CELE_M151.3, EnsemblGenomes-Gn:WBGene00019795, EnsemblGenomes-Tr:M151.3, GI:358246676, M151.3, UniProtKB/TrEMBL:O17118, WormBase:WBGene00019795		7.12074	82.5291	1.397	5.09716	3.44786e-07	3.10513e-06
RCEA007868	BX284601	F14B6.3	CAB04104.1, CELE_F14B6.3, EnsemblGenomes-Gn:WBGene00008784, EnsemblGenomes-Tr:F14B6.3, F14B6.3, GI:3875878, UniProtKB/TrEMBL:O62160, WormBase:WBGene00008784		7.1188	23.5649	1.59427	4.46523	7.99815e-06	5.11238e-05
RCEA013297	BX284602	try-1	CCD73226.1, CELE_ZK546.15, EnsemblGenomes-Gn:WBGene00006619, EnsemblGenomes-Tr:ZK546.15, GI:351064740, GOA:Q23528, InterPro:IPR001254, InterPro:IPR001314, InterPro:IPR009003, InterPro:IPR018114, try-1, UniProtKB/TrEMBL:Q23528, WormBase:WBGene00006619		7.01167	228.594	1.00348	6.98739	2.80049e-12	7.65316e-11
RCEA098437	BX284606	fkh-3	CDX47492.1, CELE_C29F7.4, fkh-3, GI:671688092, GOA:A0A078BQN7, InterPro:IPR001766, InterPro:IPR011991, UniProtKB/TrEMBL:A0A078BQN7, WormBase:WBGene00001435		7.0058	24.794	1.61679	4.33315	1.46988e-05	8.77796e-05
RCEA083165	BX284605	F14D7.2	CAB01156.1, CELE_F14D7.2, EnsemblGenomes-Gn:WBGene00008789, EnsemblGenomes-Tr:F14D7.2, F14D7.2, GI:3875871, UniProtKB/TrEMBL:Q19452, WormBase:WBGene00008789		7.0052	311.056	0.965532	7.25527	4.00857e-13	1.27572e-11
RCEA022428	BX284603	E02H9.7	CCD68639.1, CELE_E02H9.7, E02H9.7, EnsemblGenomes-Gn:WBGene00017105, EnsemblGenomes-Tr:E02H9.7.1, EnsemblGenomes-Tr:E02H9.7.2, GI:351060902, UniProtKB/TrEMBL:Q9TZA1, WormBase:WBGene00017105		7.00151	23.4516	1.66598	4.20263	2.63831e-05	0.000146643
RCEA097733	BX284606	F19H6.4	CAA92168.1, CELE_F19H6.4, EnsemblGenomes-Gn:WBGene00008959, EnsemblGenomes-Tr:F19H6.4, F19H6.4, GI:3876116, GOA:Q19605, InterPro:IPR001104, InterPro:IPR016636, UniProtKB/TrEMBL:Q19605, WormBase:WBGene00008959	3-oxo-5-alpha-steroid 4-dehydrogenase (EC 1.3.99.5)	6.97319	231.795	0.947542	7.35924	1.84964e-13	6.37029e-12
RCEA079584	BX284605	wdr-5.3	CAA98293.1, CELE_ZC302.2, EnsemblGenomes-Gn:WBGene00013862, EnsemblGenomes-Tr:ZC302.2a, GI:3881391, wdr-5.3, WormBase:WBGene00013862		6.96497	352.598	0.868314	8.02126	1.04664e-15	5.53819e-14
RCEA070364	BX284604	skr-9	CAM36325.1, CELE_C52D10.7, EnsemblGenomes-Gn:WBGene00004815, EnsemblGenomes-Tr:C52D10.7, GI:126468448, GOA:G5EFA9, InterPro:IPR001232, InterPro:IPR011333, InterPro:IPR016072, InterPro:IPR016073, InterPro:IPR016897, skr-9, UniProtKB/TrEMBL:G5EFA9, WormBase:WBGene00004815		6.95085	25.7143	1.65754	4.19348	2.74705e-05	0.000151959
RCEA097854	BX284606	R09A8.1	CBK55584.1, CELE_R09A8.1, GI:291201267, R09A8.1, UniProtKB/TrEMBL:D4PH97, WormBase:WBGene00011152		6.93564	28.9213	1.77385	3.90993	9.23238e-05	0.000440729
RCEA032943	BX284604	Y17G9A.4	CCD72231.2, CELE_Y17G9A.4, EnsemblGenomes-Gn:WBGene00021197, EnsemblGenomes-Tr:Y17G9A.4, GI:548932315, GOA:Q9N484, InterPro:IPR007767, UniProtKB/TrEMBL:Q9N484, WormBase:WBGene00021197, Y17G9A.4		6.9297	27.206	1.7501	3.95959	7.50772e-05	0.000368665
RCEA086193	BX284605	C38D9.2	C38D9.2, CAB03948.2, CELE_C38D9.2, EnsemblGenomes-Gn:WBGene00008010, EnsemblGenomes-Tr:C38D9.2.1, EnsemblGenomes-Tr:C38D9.2.2, GI:379657259, GOA:Q9XVC4, InterPro:IPR001878, UniProtKB/TrEMBL:Q9XVC4, WormBase:WBGene00008010		6.92106	83.0954	1.38427	4.99978	5.73958e-07	4.90825e-06
RCEA098336	BX284606	R04D3.3	CAA94163.1, CELE_R04D3.3, EnsemblGenomes-Gn:WBGene00011011, EnsemblGenomes-Tr:R04D3.3, GI:3878815, R04D3.3, UniProtKB/TrEMBL:Q21713, WormBase:WBGene00011011		6.91576	435.739	0.915113	7.55727	4.11609e-14	1.65136e-12
RCEA007646	BX284601	fbxa-217	CELE_Y47H9C.11, fbxa-217		6.91095	41.7662	1.78412	3.87359	0.000107244	0.000503195
RCEA041330	BX284604	D2096.5	CCD68510.1, CELE_D2096.5, D2096.5, EnsemblGenomes-Gn:WBGene00017072, EnsemblGenomes-Tr:D2096.5, GI:351060774, InterPro:IPR008588, UniProtKB/TrEMBL:Q19002, WormBase:WBGene00017072		6.89119	25.4025	1.58835	4.33857	1.4341e-05	8.58808e-05
RCEA099499	BX284606	F31F6.2	CAA93749.1, CELE_F31F6.2, EnsemblGenomes-Gn:WBGene00009301, EnsemblGenomes-Tr:F31F6.2, F31F6.2, GI:3892142, UniProtKB/TrEMBL:Q19943, WormBase:WBGene00009301		6.88486	27.7806	1.6505	4.17137	3.02776e-05	0.000165425
RCEA070372	BX284604	skr-8	CAM36327.1, CELE_C52D10.9, EnsemblGenomes-Gn:WBGene00004814, EnsemblGenomes-Tr:C52D10.9, GI:126468450, GOA:G5ECY4, InterPro:IPR001232, InterPro:IPR011333, InterPro:IPR016072, InterPro:IPR016073, InterPro:IPR016897, skr-8, UniProtKB/TrEMBL:G5ECY4, WormBase:WBGene00004814		6.86296	77.7587	1.46419	4.6872	2.76963e-06	1.99142e-05
RCEA040202	BX284604	C42D4.19	C42D4.19, CDH93026.1, CELE_C42D4.19, EnsemblGenomes-Gn:WBGene00235295, EnsemblGenomes-Tr:C42D4.19, GI:548932076, UniProtKB/TrEMBL:U4PAW9, WormBase:WBGene00235295		6.8523	27.3213	1.70184	4.02641	5.66347e-05	0.000286689
RCEA009739	BX284602	T25D3.3	CCD72840.1, CELE_T25D3.3, EnsemblGenomes-Gn:WBGene00020797, EnsemblGenomes-Tr:T25D3.3, GI:351064452, GOA:Q965I8, InterPro:IPR001926, T25D3.3, UniProtKB/TrEMBL:Q965I8, WormBase:WBGene00020797		6.84812	82.4574	1.35682	5.04719	4.48349e-07	3.90043e-06
RCEA012579	BX284602	T24E12.1	CCD69340.1, CELE_T24E12.1, EnsemblGenomes-Gn:WBGene00020771, EnsemblGenomes-Tr:T24E12.1, GI:373254276, T24E12.1, UniProtKB/TrEMBL:O44885, WormBase:WBGene00020771		6.84198	69.4367	1.41256	4.84369	1.27449e-06	9.94088e-06
RCEA011526	BX284602	bath-12	bath-12, CELE_F59H5.3		6.8326	26.426	1.72664	3.95717	7.58443e-05	0.000371827
RCEA006214	BX284601	ztf-11	CAB05737.2, CELE_F52F12.6, GI:6434299, GOA:O02274, InterPro:IPR002515, UniProtKB/TrEMBL:O02274, WormBase:WBGene00009939, ztf-11		6.81963	31.4313	1.6284	4.18793	2.81515e-05	0.000155555
RCEA074976	BX284605	F08F3.6	CCD65595.1, CELE_F08F3.6, EnsemblGenomes-Gn:WBGene00017263, EnsemblGenomes-Tr:F08F3.6, F08F3.6, GI:373254026, GOA:Q22946, InterPro:IPR001810, InterPro:IPR012885, UniProtKB/TrEMBL:Q22946, WormBase:WBGene00017263		6.81503	250.689	0.959818	7.10033	1.24459e-12	3.58295e-11
RCEA098812	BX284606	meg-1	CAA93511.1, CELE_K02B9.1, EnsemblGenomes-Gn:WBGene00010492, EnsemblGenomes-Tr:K02B9.1, GI:3878128, GOA:Q21126, meg-1, UniProtKB/TrEMBL:Q21126, WormBase:WBGene00010492		6.79797	493.427	0.777168	8.74711	2.18879e-18	2.00109e-16
RCEA044691	BX284604	tbx-36	CAA98075.1, CELE_ZK829.5, EnsemblGenomes-Gn:WBGene00006555, EnsemblGenomes-Tr:ZK829.5, GI:3881824, tbx-36, WormBase:WBGene00006555		6.79599	57.6776	1.41961	4.78722	1.69105e-06	1.27867e-05
RCEA049797	BX284604	F02H6.3	CDR32707.1, CELE_F02H6.3, EnsemblGenomes-Gn:WBGene00008536, EnsemblGenomes-Tr:F02H6.3a.1, EnsemblGenomes-Tr:F02H6.3a.2, EnsemblGenomes-Tr:F02H6.3c, F02H6.3, GI:646227202, UniProtKB/TrEMBL:O62132, WormBase:WBGene00008536		6.79589	84.3295	1.43151	4.74735	2.06097e-06	1.5285e-05
RCEA010366	BX284602	fbxc-32	CCD66351.1, CELE_C32B5.10, EnsemblGenomes-Gn:WBGene00016303, EnsemblGenomes-Tr:C32B5.10, fbxc-32, GI:351065178, InterPro:IPR021942, UniProtKB/TrEMBL:P91104, WormBase:WBGene00016303		6.76833	35.3163	1.58681	4.26537	1.9957e-05	0.000115169
RCEA099495	BX284606	C27C12.3	C27C12.3, CAA93745.1, CELE_C27C12.3, EnsemblGenomes-Gn:WBGene00007773, EnsemblGenomes-Tr:C27C12.3, GI:3892137, UniProtKB/TrEMBL:G5EEW4, WormBase:WBGene00007773		6.74643	30.0184	1.58098	4.26724	1.9791e-05	0.000114386
RCEA097858	BX284606	R09A8.2	CAA92004.2, CELE_R09A8.2, EnsemblGenomes-Gn:WBGene00011153, EnsemblGenomes-Tr:R09A8.2, GI:31043803, R09A8.2, UniProtKB/TrEMBL:Q21853, WormBase:WBGene00011153		6.74288	28.0571	1.70602	3.95241	7.73688e-05	0.000378194
RCEA011631	BX284602	F22E5.20	CCD68460.1, CELE_F22E5.20, EnsemblGenomes-Gn:WBGene00017713, EnsemblGenomes-Tr:F22E5.20, F22E5.20, GI:373254226, UniProtKB/TrEMBL:Q7KQ96, WormBase:WBGene00017713		6.73523	20.966	1.64738	4.08846	4.3424e-05	0.000227685
RCEA074694	BX284605	F26G5.1	CCD62596.1, CELE_F26G5.1, EnsemblGenomes-Gn:WBGene00017843, EnsemblGenomes-Tr:F26G5.1a, F26G5.1, GI:351020612, UniProtKB/TrEMBL:H2KYD9, WormBase:WBGene00017843		6.73302	308.294	0.806165	8.35191	6.71654e-17	4.56392e-15
RCEA028646	BX284603	tbx-33	CAC35862.2, CELE_Y66A7A.8, EnsemblGenomes-Gn:WBGene00006552, EnsemblGenomes-Tr:Y66A7A.8, GI:211970261, tbx-33, WormBase:WBGene00006552		6.72314	31.6558	1.56649	4.29186	1.7718e-05	0.000103958
RCEA023362	BX284603	F43C1.7	CAH10806.2, CELE_F43C1.7, EnsemblGenomes-Gn:WBGene00023423, EnsemblGenomes-Tr:F43C1.7, F43C1.7, GI:262225519, InterPro:IPR008532, UniProtKB/TrEMBL:Q6A574, WormBase:WBGene00023423		6.69703	49.0931	1.7643	3.79585	0.000147137	0.000660582
RCEA088623	BX284606	set-33	CCD61183.1, CELE_Y108F1.3, EnsemblGenomes-Gn:WBGene00022431, EnsemblGenomes-Tr:Y108F1.3, GI:351065235, InterPro:IPR001214, set-33, UniProtKB/TrEMBL:Q8MXK5, WormBase:WBGene00022431		6.69036	20.8385	1.75225	3.81815	0.000134458	0.000612967
RCEA026066	BX284603	F54H12.5	CCD63462.1, CELE_F54H12.5, EnsemblGenomes-Gn:WBGene00018845, EnsemblGenomes-Tr:F54H12.5, F54H12.5, GI:351021195, WormBase:WBGene00018845		6.68822	26.476	1.74734	3.82766	0.000129367	0.000592982
RCEA089500	BX284606	rgs-9	CCD61690.1, CELE_ZC53.7, EnsemblGenomes-Gn:WBGene00004352, EnsemblGenomes-Tr:ZC53.7, GI:351065702, rgs-9, WormBase:WBGene00004352	Hypothetical protein	6.68807	72.6132	1.2777	5.23446	1.6547e-07	1.61981e-06
RCEA005394	BX284601	fipr-26	CAB54255.1, CELE_F53B6.8, EnsemblGenomes-Gn:WBGene00009963, EnsemblGenomes-Tr:F53B6.8, fipr-26, GI:5824510, UniProtKB/TrEMBL:Q9U3E7, WormBase:WBGene00009963		6.66274	15.8471	1.88588	3.53296	0.000410941	0.00162705
RCEA010327	BX284602	fbxa-200	CELE_T07D3.1, fbxa-200		6.64675	24.4913	1.82033	3.65139	0.000260823	0.00108839
RCEA090673	BX284606	ZK813.2	CCD63035.1, CELE_ZK813.2, EnsemblGenomes-Gn:WBGene00022821, EnsemblGenomes-Tr:ZK813.2, GI:351021023, UniProtKB/TrEMBL:Q23605, WormBase:WBGene00022821, ZK813.2		6.64593	1638.84	0.822862	8.0766	6.65996e-16	3.65329e-14
RCEA010468	BX284602	btb-10	btb-10, CCD63501.1, CELE_K02E7.9, EnsemblGenomes-Gn:WBGene00019313, EnsemblGenomes-Tr:K02E7.9, GI:351021241, InterPro:IPR000210, InterPro:IPR011333, UniProtKB/TrEMBL:O17253, WormBase:WBGene00019313		6.64518	22.4555	1.71794	3.86811	0.000109683	0.000512411
RCEA095357	BX284606	C25A11.10	C25A11.10, CCG28109.1, CELE_C25A11.10, EnsemblGenomes-Gn:WBGene00219374, EnsemblGenomes-Tr:C25A11.10, GI:379656888, UniProtKB/TrEMBL:H8W3W9, WormBase:WBGene00219374		6.63107	48.8221	1.40441	4.7216	2.34e-06	1.70856e-05
RCEA100446	BX284606	F23A7.1	CAB02975.1, CELE_F23A7.1, EnsemblGenomes-Gn:WBGene00009067, EnsemblGenomes-Tr:F23A7.1, F23A7.1, GI:3876264, GOA:Q93553, UniProtKB/TrEMBL:Q93553, WormBase:WBGene00009067		6.59448	33.4576	1.62967	4.04651	5.19859e-05	0.000266391
RCEA087063	BX284605	F11D11.3	CAB04096.1, CELE_F11D11.3, EnsemblGenomes-Gn:WBGene00008698, EnsemblGenomes-Tr:F11D11.3, F11D11.3, GI:3875785, GOA:O62153, InterPro:IPR005071, UniProtKB/TrEMBL:O62153, WormBase:WBGene00008698		6.56912	23.5519	1.69819	3.86831	0.000109594	0.00051227
RCEA097348	BX284606	Y62H9A.3	CAA21560.1, CELE_Y62H9A.3, EnsemblGenomes-Gn:WBGene00013391, EnsemblGenomes-Tr:Y62H9A.3, GI:3881220, UniProtKB/TrEMBL:Q9XWT5, WormBase:WBGene00013391, Y62H9A.3		6.56719	5046.24	0.669991	9.80191	1.10474e-22	2.16429e-20
RCEA010414	BX284602	fbxc-42	CCD66371.1, CELE_F45D11.9, EnsemblGenomes-Gn:WBGene00018455, EnsemblGenomes-Tr:F45D11.9, fbxc-42, GI:351058675, InterPro:IPR021942, UniProtKB/TrEMBL:Q9N5T9, WormBase:WBGene00018455		6.56064	24.6072	1.64076	3.99854	6.37346e-05	0.00031899
RCEA008480	BX284601	C17H1.5	C17H1.5, CAB07169.1, CELE_C17H1.5, EnsemblGenomes-Gn:WBGene00007658, EnsemblGenomes-Tr:C17H1.5, GI:3874477, UniProtKB/TrEMBL:O45256, WormBase:WBGene00007658		6.55569	36.7761	1.64338	3.98914	6.63122e-05	0.000329921
RCEA097681	BX284606	F17A2.13	CAA92157.2, CELE_F17A2.13, EnsemblGenomes-Gn:WBGene00008904, EnsemblGenomes-Tr:F17A2.13, F17A2.13, GI:31043766, UniProtKB/TrEMBL:Q19510, WormBase:WBGene00008904		6.54993	27.772	1.61752	4.04937	5.13552e-05	0.00026368
RCEA084718	BX284605	pzf-1	CAA19434.2, CELE_T05G11.1, EnsemblGenomes-Gn:WBGene00011505, EnsemblGenomes-Tr:T05G11.1a, GI:169402859, GOA:G5EGQ2, InterPro:IPR001781, InterPro:IPR007087, InterPro:IPR015880, pzf-1, UniProtKB/TrEMBL:G5EGQ2, WormBase:WBGene00011505		6.51962	151.18	1.28465	5.07503	3.8743e-07	3.44192e-06
RCEA083500	BX284605	F43D2.3	CAB05723.1, CELE_F43D2.3, EnsemblGenomes-Gn:WBGene00009652, EnsemblGenomes-Tr:F43D2.3, F43D2.3, GI:3877141, UniProtKB/TrEMBL:Q9XU58, WormBase:WBGene00009652		6.51693	34.3308	1.67474	3.8913	9.97066e-05	0.000470759
RCEA004700	BX284601	F20G4.2	CAA99840.2, CELE_F20G4.2, EnsemblGenomes-Gn:WBGene00008991, EnsemblGenomes-Tr:F20G4.2, F20G4.2, GI:172052133, UniProtKB/TrEMBL:Q19657, WormBase:WBGene00008991		6.4956	70.684	1.4101	4.60648	4.09537e-06	2.83388e-05
RCEA019525	BX284602	F15A4.10	CAB02940.1, CELE_F15A4.10, F15A4.10, GI:3875972, WormBase:WBGene00008844		6.49189	27.134	1.61957	4.00841	6.11301e-05	0.000307485
RCEA028679	BX284603	col-95	CAD66222.1, CELE_Y41C4A.16, col-95, EnsemblGenomes-Gn:WBGene00000670, EnsemblGenomes-Tr:Y41C4A.16, GI:28316223, GOA:Q86MP1, InterPro:IPR002486, InterPro:IPR008160, UniProtKB/TrEMBL:Q86MP1, WormBase:WBGene00000670		6.48858	6199.85	0.565101	11.4822	1.62158e-30	1.28745e-27
RCEA073774	BX284605	T24A6.7	CCD63571.1, CELE_T24A6.7, EnsemblGenomes-Gn:WBGene00020747, EnsemblGenomes-Tr:T24A6.7, GI:351021308, GOA:O61936, InterPro:IPR012816, T24A6.7, UniProtKB/TrEMBL:O61936, WormBase:WBGene00020747	Hypothetical cytosolic protein	6.47454	50.7518	1.4193	4.56178	5.07221e-06	3.42499e-05
RCEA090671	BX284606	ZK813.3	CCD63040.1, CELE_ZK813.3, EnsemblGenomes-Gn:WBGene00022822, EnsemblGenomes-Tr:ZK813.3, GI:351021028, GOA:Q23604, InterPro:IPR005649, UniProtKB/TrEMBL:Q23604, WormBase:WBGene00022822, ZK813.3		6.47152	11099.5	0.693168	9.33615	9.99012e-21	1.42171e-18
RCEA098476	BX284606	col-183	CAA91932.1, CELE_F02D10.1, col-183, EnsemblGenomes-Gn:WBGene00000756, EnsemblGenomes-Tr:F02D10.1, GI:3875538, GOA:Q19111, InterPro:IPR002486, UniProtKB/TrEMBL:Q19111, WormBase:WBGene00000756		6.47118	1431.94	0.862477	7.50302	6.23626e-14	2.40599e-12
RCEA078508	BX284605	cyp-29A4	CAB11775.2, CELE_B0331.1, cyp-29A4, EnsemblGenomes-Gn:WBGene00007140, EnsemblGenomes-Tr:B0331.1, GI:198446543, GOA:O45219, InterPro:IPR001128, InterPro:IPR002401, InterPro:IPR017972, UniProtKB/TrEMBL:O45219, WormBase:WBGene00007140		6.45935	15.8681	1.99946	3.23054	0.00123556	0.00422353
RCEA011786	BX284602	Y110A2AL.3	CCD72972.1, CELE_Y110A2AL.3, EnsemblGenomes-Gn:WBGene00022440, EnsemblGenomes-Tr:Y110A2AL.3, GI:351064528, InterPro:IPR007026, UniProtKB/TrEMBL:Q9N498, WormBase:WBGene00022440, Y110A2AL.3		6.38875	22.1086	1.84693	3.45912	0.000541947	0.00206551
RCEA001478	BX284601	Y71F9AL.7	CCD73502.1, CELE_Y71F9AL.7, EnsemblGenomes-Gn:WBGene00022112, EnsemblGenomes-Tr:Y71F9AL.7, GI:351059473, GOA:Q9N4H9, UniProtKB/TrEMBL:Q9N4H9, WormBase:WBGene00022112, Y71F9AL.7		6.37895	14.543	1.78736	3.56893	0.000358441	0.00144227
RCEA075500	BX284605	F29G9.7	CCD64138.1, CELE_F29G9.7, EnsemblGenomes-Gn:WBGene00017933, EnsemblGenomes-Tr:F29G9.7, F29G9.7, GI:351050060, GOA:O16372, InterPro:IPR012885, UniProtKB/TrEMBL:O16372, WormBase:WBGene00017933		6.37477	23.463	1.63055	3.90959	9.24529e-05	0.00044117
RCEA083914	BX284605	T01G5.7	CAB03269.2, CELE_T01G5.7, EnsemblGenomes-Gn:WBGene00011342, EnsemblGenomes-Tr:T01G5.7, GI:169402815, GOA:O18012, InterPro:IPR001841, InterPro:IPR013083, InterPro:IPR017907, InterPro:IPR018957, T01G5.7, UniProtKB/TrEMBL:O18012, WormBase:WBGene00011342		6.36509	20.9037	1.82897	3.48015	0.000501135	0.00193143
RCEA006921	BX284601	vet-2	CCD66820.2, CELE_C35E7.1, EnsemblGenomes-Gn:WBGene00016453, EnsemblGenomes-Tr:C35E7.1a, GI:412982109, GOA:O61775, UniProtKB/TrEMBL:O61775, vet-2, WormBase:WBGene00016453		6.36483	44.1912	1.35431	4.69969	2.60552e-06	1.88781e-05
RCEA099360	BX284606	hch-1	CAB61002.1, CELE_F40E10.1, EnsemblGenomes-Gn:WBGene00001828, EnsemblGenomes-Tr:F40E10.1, GI:6435513, hch-1, WormBase:WBGene00001828		6.335	28.9495	1.74816	3.62381	0.000290295	0.00119582
RCEA005086	BX284601	K02B12.2	CAB00032.1, CELE_K02B12.2, EnsemblGenomes-Gn:WBGene00010495, EnsemblGenomes-Tr:K02B12.2, GI:3878159, K02B12.2, UniProtKB/TrEMBL:Q21114, WormBase:WBGene00010495		6.32405	19.1849	1.68169	3.76053	0.000169552	0.000748738
RCEA074906	BX284605	C10G8.4	C10G8.4, CCD64159.1, CELE_C10G8.4, EnsemblGenomes-Gn:WBGene00015683, EnsemblGenomes-Tr:C10G8.4, GI:351050073, InterPro:IPR002919, UniProtKB/TrEMBL:Q94162, WormBase:WBGene00015683		6.30142	394.831	0.80336	7.84383	4.37014e-15	2.04098e-13
RCEA090646	BX284606	vit-5	CCD63027.1, CELE_C04F6.1, GI:373218753, vit-5, WormBase:WBGene00006929	Vitellogenin	6.28965	165436	0.856324	7.34494	2.05851e-13	6.9873e-12
RCEA049746	BX284604	K01G12.3	CAB05237.2, CELE_K01G12.3, EnsemblGenomes-Gn:WBGene00010483, EnsemblGenomes-Tr:K01G12.3, GI:114420892, K01G12.3, UniProtKB/TrEMBL:O45633, WormBase:WBGene00010483		6.28378	44.7567	1.37472	4.57097	4.85483e-06	3.29739e-05
RCEA070902	BX284604	clec-196	CAB02321.1, CELE_F26D10.12, clec-196, GI:3924752, GOA:Q9XVT9, InterPro:IPR001304, InterPro:IPR016186, InterPro:IPR016187, UniProtKB/TrEMBL:Q9XVT9, WormBase:WBGene00009156		6.27133	16.7319	1.89512	3.3092	0.000935641	0.00331025
RCEA086622	BX284605	C31G12.1	C31G12.1, CAB03932.1, CELE_C31G12.1, EnsemblGenomes-Gn:WBGene00007850, EnsemblGenomes-Tr:C31G12.1, GI:3874689, GOA:O17629, UniProtKB/TrEMBL:O17629, WormBase:WBGene00007850		6.26895	15.6947	1.97821	3.16901	0.00152959	0.0050947
RCEA043747	BX284604	aqp-3	aqp-3, CAA22259.1, CELE_Y69E1A.7, EnsemblGenomes-Gn:WBGene00000171, EnsemblGenomes-Tr:Y69E1A.7a, GI:3947638, GOA:Q9XW36, InterPro:IPR000425, InterPro:IPR022357, InterPro:IPR023271, UniProtKB/TrEMBL:Q9XW36, WormBase:WBGene00000171		6.26633	15.5467	1.68688	3.71475	0.000203403	0.000878249
RCEA046440	BX284604	Y45F10C.2	CAB16475.1, CELE_Y45F10C.2, EnsemblGenomes-Gn:WBGene00012878, EnsemblGenomes-Tr:Y45F10C.2, GI:3880966, WormBase:WBGene00012878, Y45F10C.2		6.24433	88.0781	1.25054	4.9933	5.93551e-07	5.0586e-06
RCEA092418	BX284606	C41G11.1	C41G11.1, CCD67133.1, CELE_C41G11.1, EnsemblGenomes-Gn:WBGene00016568, EnsemblGenomes-Tr:C41G11.1a, GI:351059538, GOA:Q3Y403, InterPro:IPR004843, InterPro:IPR029052, UniProtKB/TrEMBL:Q3Y403, WormBase:WBGene00016568		6.24402	751.315	0.633531	9.8559	6.46327e-23	1.3356e-20
RCEA008919	BX284601	W04A8.5	CAB04905.1, CELE_W04A8.5, EnsemblGenomes-Gn:WBGene00012240, EnsemblGenomes-Tr:W04A8.5, GI:3880475, InterPro:IPR001810, UniProtKB/TrEMBL:Q9XUM1, W04A8.5, WormBase:WBGene00012240		6.24343	14.587	1.71652	3.63725	0.00027556	0.00114198
RCEA085621	BX284605	fbxa-207	CELE_Y102A5C.3, fbxa-207		6.23671	18.5254	1.63475	3.81508	0.000136139	0.000619139
RCEA016973	BX284602	hlh-3	CAA92758.2, CELE_T24B8.6, GI:194686270, GOA:Q22717, hlh-3, InterPro:IPR011598, InterPro:IPR015660, UniProtKB/TrEMBL:Q22717, WormBase:WBGene00001950		6.23219	15.8246	1.77423	3.51262	0.000443716	0.00173989
RCEA012442	BX284602	M151.7	CCD69710.1, CELE_M151.7, EnsemblGenomes-Gn:WBGene00019799, EnsemblGenomes-Tr:M151.7, GI:351061857, M151.7, UniProtKB/TrEMBL:Q965L8, WormBase:WBGene00019799		6.2316	154.425	1.2686	4.9122	9.00582e-07	7.30784e-06
RCEA008427	BX284601	hpo-2	CAB54340.2, CELE_Y26D4A.2, EnsemblGenomes-Gn:WBGene00012500, EnsemblGenomes-Tr:Y26D4A.2, GI:38422464, hpo-2, InterPro:IPR001304, InterPro:IPR006583, InterPro:IPR016186, UniProtKB/TrEMBL:Q9U2Q4, WormBase:WBGene00012500		6.21936	10.317	2.02804	3.06669	0.00216443	0.00689555
RCEA042233	BX284604	F56D5.5	CAA93504.1, CELE_F56D5.5, EnsemblGenomes-Gn:WBGene00010149, EnsemblGenomes-Tr:F56D5.5, F56D5.5, GI:3877706, UniProtKB/TrEMBL:Q20885, WormBase:WBGene00010149		6.20733	14.1646	1.80212	3.44447	0.000572188	0.00216762
RCEA028750	BX284603	C18D11.6	C18D11.6, CAD90171.3, CELE_C18D11.6, EnsemblGenomes-Gn:WBGene00007682, EnsemblGenomes-Tr:C18D11.6, GI:257145806, UniProtKB/TrEMBL:Q86DA6, WormBase:WBGene00007682		6.20491	107.611	1.44766	4.28616	1.81785e-05	0.00010637
RCEA052668	BX284604	Y57G11B.5	CAB16499.1, CELE_Y57G11B.5, EnsemblGenomes-Gn:WBGene00013297, EnsemblGenomes-Tr:Y57G11B.5, GI:3881174, UniProtKB/TrEMBL:O18224, WormBase:WBGene00013297, Y57G11B.5		6.20273	5056.81	0.736748	8.41907	3.79488e-17	2.65564e-15
RCEA085770	BX284605	T05E12.3	CAB04686.1, CELE_T05E12.3, EnsemblGenomes-Gn:WBGene00011486, EnsemblGenomes-Tr:T05E12.3, GI:4008382, GOA:Q9XUR6, InterPro:IPR000210, InterPro:IPR003131, InterPro:IPR011333, T05E12.3, UniProtKB/TrEMBL:Q9XUR6, WormBase:WBGene00011486		6.1932	93.618	1.1269	5.4958	3.88944e-08	4.37199e-07
RCEA100440	BX284606	R11.4	CAB04648.1, CELE_R11.4, EnsemblGenomes-Gn:WBGene00011229, EnsemblGenomes-Tr:R11.4, GI:3879108, GOA:O62344, R11.4, UniProtKB/TrEMBL:O62344, WormBase:WBGene00011229		6.18886	18.4502	1.76314	3.51013	0.000447885	0.00175398
RCEA010346	BX284602	fbxc-28	CCD66379.1, CELE_R07C3.6, EnsemblGenomes-Gn:WBGene00019922, EnsemblGenomes-Tr:R07C3.6, fbxc-28, GI:351058681, InterPro:IPR021942, UniProtKB/TrEMBL:O16771, WormBase:WBGene00019922		6.18703	14.4447	1.94988	3.17303	0.00150858	0.00503584
RCEA017624	BX284602	C05C10.5	C05C10.5, CAA88203.1, CELE_C05C10.5, EnsemblGenomes-Gn:WBGene00007332, EnsemblGenomes-Tr:C05C10.5a, GI:3874070, WormBase:WBGene00007332		6.18627	594.782	0.673715	9.18234	4.21842e-20	5.39278e-18
RCEA021677	BX284603	E_BE45912.2	CCD62284.1, CELE_E_BE45912.2, E_BE45912.2, EnsemblGenomes-Gn:WBGene00017153, EnsemblGenomes-Tr:E_BE45912.2, GI:373218651, GOA:Q8ITZ9, InterPro:IPR009545, UniProtKB/TrEMBL:Q8ITZ9, WormBase:WBGene00017153		6.17086	46.4783	1.34068	4.60277	4.16906e-06	2.87696e-05
RCEA074001	BX284605	C17E7.12	C17E7.12, CCD64878.1, CELE_C17E7.12, EnsemblGenomes-Gn:WBGene00015905, EnsemblGenomes-Tr:C17E7.12, GI:351050339, GOA:Q965M6, UniProtKB/TrEMBL:Q965M6, WormBase:WBGene00015905		6.16781	33.047	1.64359	3.75266	0.000174969	0.000769507
RCEA015282	BX284602	nos-2	CCD73713.1, CELE_ZK1127.1, EnsemblGenomes-Gn:WBGene00003784, EnsemblGenomes-Tr:ZK1127.1.1, EnsemblGenomes-Tr:ZK1127.1.2, GI:373220448, GOA:Q23406, InterPro:IPR008705, InterPro:IPR024161, nos-2, UniProtKB/TrEMBL:Q23406, WormBase:WBGene00003784		6.15994	1185.07	0.721452	8.53827	1.36251e-17	1.06495e-15
RCEA008591	BX284601	vet-6	CAB03105.1, CELE_F44F1.7, EnsemblGenomes-Gn:WBGene00006902, EnsemblGenomes-Tr:F44F1.7, GI:3877124, GOA:G5EEK5, UniProtKB/TrEMBL:G5EEK5, vet-6, WormBase:WBGene00006902		6.15983	13.6519	2.00629	3.07026	0.00213876	0.00681809
RCEA074108	BX284605	K09D9.12	CELE_K09D9.12, EnsemblGenomes-Gn:WBGene00044515, EnsemblGenomes-Tr:K10C9.9, K09D9.12	Hypothetical protein	6.15281	24.8828	1.70022	3.61884	0.000295926	0.00121636
RCEA097330	BX284606	mes-1	CAA91758.2, CELE_F54F7.5, EnsemblGenomes-Gn:WBGene00003219, EnsemblGenomes-Tr:F54F7.5, GI:14530461, GOA:G5EBL2, InterPro:IPR000719, InterPro:IPR001245, InterPro:IPR011009, mes-1, UniProtKB/TrEMBL:G5EBL2, WormBase:WBGene00003219		6.15111	51.7383	1.52346	4.0376	5.40006e-05	0.000275575
RCEA003500	BX284601	vet-1	CCD73364.1, CELE_T05E7.5, EnsemblGenomes-Gn:WBGene00020261, EnsemblGenomes-Tr:T05E7.5, GI:351064907, UniProtKB/TrEMBL:O01861, vet-1, WormBase:WBGene00020261		6.1479	17.0874	1.60895	3.82107	0.000132872	0.000606467
RCEA012131	BX284602	scl-15	CCD64920.1, CELE_F02E11.5, EnsemblGenomes-Gn:WBGene00017183, EnsemblGenomes-Tr:F02E11.5, GI:373218993, InterPro:IPR001283, InterPro:IPR002413, InterPro:IPR014044, scl-15, UniProtKB/TrEMBL:O16575, WormBase:WBGene00017183		6.14661	12.6235	2.03962	3.0136	0.00258165	0.00803463
RCEA007077	BX284601	clec-94	CAB05019.1, CELE_ZK39.3, clec-94, EnsemblGenomes-Gn:WBGene00013928, EnsemblGenomes-Tr:ZK39.3, GI:3881628, GOA:Q9XUI1, InterPro:IPR001304, InterPro:IPR016186, InterPro:IPR016187, UniProtKB/TrEMBL:Q9XUI1, WormBase:WBGene00013928	Hypothetical protein	6.14464	12.1949	2.4911	2.46663	0.013639	0.0331365
RCEA085859	BX284605	F40D4.13	CAB04361.1, CELE_F40D4.13, EnsemblGenomes-Gn:WBGene00009572, EnsemblGenomes-Tr:F40D4.13a, F40D4.13, GI:3876974, UniProtKB/TrEMBL:Q9XV33, WormBase:WBGene00009572		6.14125	38.073	1.38638	4.42971	9.43593e-06	5.93784e-05
RCEA063055	BX284604	skr-10	CAB54358.1, CELE_Y105C5B.13, EnsemblGenomes-Gn:WBGene00004816, EnsemblGenomes-Tr:Y105C5B.13, GI:5824668, GOA:G5EG39, InterPro:IPR001232, InterPro:IPR011333, InterPro:IPR016072, InterPro:IPR016073, InterPro:IPR016897, skr-10, UniProtKB/TrEMBL:G5EG39, WormBase:WBGene00004816		6.14059	64.3589	1.35709	4.52483	6.04435e-06	4.00435e-05
RCEA098332	BX284606	R04D3.2	CAA94162.1, CELE_R04D3.2, EnsemblGenomes-Gn:WBGene00011010, EnsemblGenomes-Tr:R04D3.2, GI:3878814, R04D3.2, UniProtKB/TrEMBL:Q21712, WormBase:WBGene00011010		6.13799	247.149	0.847777	7.2401	4.48349e-13	1.41197e-11
RCEA098810	BX284606	meg-2	CAA93509.2, CELE_K02B9.2, EnsemblGenomes-Gn:WBGene00010493, EnsemblGenomes-Tr:K02B9.2, GI:34555824, GOA:Q21127, meg-2, UniProtKB/TrEMBL:Q21127, WormBase:WBGene00010493		6.13492	139.069	0.918171	6.68167	2.36235e-11	5.34274e-10
RCEA085408	BX284605	W06G6.17	CAR31503.1, CELE_W06G6.17, EnsemblGenomes-Gn:WBGene00086565, EnsemblGenomes-Tr:W06G6.17, GI:194686258, UniProtKB/TrEMBL:B5BM44, W06G6.17, WormBase:WBGene00086565		6.13388	11.8152	1.90665	3.21709	0.00129499	0.00439283
RCEA039376	BX284604	F38A5.22	CDK13569.1, CELE_F38A5.22, EnsemblGenomes-Gn:WBGene00235391, EnsemblGenomes-Tr:F38A5.22, F38A5.22, GI:563403477, GOA:V6CLT2, InterPro:IPR001534, UniProtKB/TrEMBL:V6CLT2, WormBase:WBGene00235391		6.1332	24.6631	1.68259	3.64509	0.0002673	0.00111093
RCEA044378	BX284604	ttr-50	CAA97805.1, CELE_F58B3.9, EnsemblGenomes-Gn:WBGene00010234, EnsemblGenomes-Tr:F58B3.9, GI:3877886, GOA:G5EE48, InterPro:IPR001534, ttr-50, UniProtKB/TrEMBL:G5EE48, WormBase:WBGene00010234		6.12246	178.063	1.20993	5.06018	4.18867e-07	3.68218e-06
RCEA008912	BX284601	W04A8.2	CAB04903.3, CELE_W04A8.2, EnsemblGenomes-Gn:WBGene00012237, EnsemblGenomes-Tr:W04A8.2, GI:193248180, UniProtKB/TrEMBL:Q9XUM3, W04A8.2, WormBase:WBGene00012237		6.10513	16.4294	1.78166	3.42665	0.000611079	0.00229764
RCEA096544	BX284606	pgp-7	CAA94219.3, CELE_T21E8.2, EnsemblGenomes-Gn:WBGene00004001, EnsemblGenomes-Tr:T21E8.2, GI:50507726, GOA:Q22655, InterPro:IPR003439, InterPro:IPR003593, InterPro:IPR011527, InterPro:IPR017871, InterPro:IPR027417, pgp-7, UniProtKB/TrEMBL:Q22655, WormBase:WBGene00004001	Multidrug resistance ABC transporter ATP-binding and permease protein	6.1032	17.2774	1.6669	3.66141	0.000250831	0.00105135
RCEA012239	BX284602	bath-9	bath-9, CCD69498.1, CELE_Y49F6C.3, EnsemblGenomes-Gn:WBGene00021725, EnsemblGenomes-Tr:Y49F6C.3, GI:351061653, InterPro:IPR000210, InterPro:IPR002083, InterPro:IPR008974, InterPro:IPR011333, UniProtKB/TrEMBL:Q9TYJ0, WormBase:WBGene00021725		6.10088	15.5356	1.83069	3.33256	0.000860511	0.00308626
RCEA090677	BX284606	ZK813.1	CCD63034.1, CELE_ZK813.1, EnsemblGenomes-Gn:WBGene00022820, EnsemblGenomes-Tr:ZK813.1.1, EnsemblGenomes-Tr:ZK813.1.2, GI:351021022, GOA:Q23606, InterPro:IPR005649, UniProtKB/TrEMBL:Q23606, WormBase:WBGene00022820, ZK813.1		6.09816	5648.42	0.752452	8.10438	5.3015e-16	2.95104e-14
RCEA097354	BX284606	Y62H9A.6	CAA21562.1, CELE_Y62H9A.6, EnsemblGenomes-Gn:WBGene00013394, EnsemblGenomes-Tr:Y62H9A.6, GI:3881222, UniProtKB/TrEMBL:Q9XWT3, WormBase:WBGene00013394, Y62H9A.6		6.09616	4531.39	0.768086	7.93681	2.07446e-15	1.02938e-13
RCEA017098	BX284602	C01G6.3	C01G6.3, CAA84634.2, CELE_C01G6.3, EnsemblGenomes-Gn:WBGene00007225, EnsemblGenomes-Tr:C01G6.3, GI:54110620, UniProtKB/TrEMBL:Q17572, WormBase:WBGene00007225		6.09196	1116.82	0.53851	11.3126	1.13644e-29	8.16341e-27
RCEA063437	BX284604	Y105C5B.20	CAB54366.1, CELE_Y105C5B.20, EnsemblGenomes-Gn:WBGene00013659, EnsemblGenomes-Tr:Y105C5B.20, GI:5824676, UniProtKB/TrEMBL:Q9NAM1, WormBase:WBGene00013659, Y105C5B.20		6.07053	28.6496	1.71267	3.54448	0.000393391	0.00156537
RCEA012605	BX284602	F54D10.7	CCD64812.1, CELE_F54D10.7, EnsemblGenomes-Gn:WBGene00018808, EnsemblGenomes-Tr:F54D10.7, F54D10.7, GI:351050270, GOA:Q9TZ84, InterPro:IPR000626, InterPro:IPR029071, UniProtKB/TrEMBL:Q9TZ84, WormBase:WBGene00018808		6.06105	125.214	1.00488	6.03163	1.62318e-09	2.47329e-08
RCEA001010	BX284601	W03F11.1	CCD69309.1, CELE_W03F11.1, EnsemblGenomes-Gn:WBGene00021005, EnsemblGenomes-Tr:W03F11.1a, GI:351061510, GOA:O01780, InterPro:IPR002557, UniProtKB/TrEMBL:O01780, W03F11.1, WormBase:WBGene00021005		6.04938	5743.03	0.57287	10.5598	4.57766e-26	1.81721e-23
RCEA010957	BX284602	btb-6	btb-6, CCD71256.1, CELE_F45C12.7, EnsemblGenomes-Gn:WBGene00018438, EnsemblGenomes-Tr:F45C12.7, GI:351063175, InterPro:IPR000210, InterPro:IPR011333, UniProtKB/TrEMBL:O16741, WormBase:WBGene00018438		6.04809	94.4506	1.02406	5.90599	3.50526e-09	4.95101e-08
RCEA071325	BX284605	kin-34	CCD68552.1, CELE_R02C2.2, EnsemblGenomes-Gn:WBGene00019815, EnsemblGenomes-Tr:R02C2.2, GI:351060807, GOA:O44546, InterPro:IPR000719, InterPro:IPR002290, InterPro:IPR008271, InterPro:IPR011009, InterPro:IPR017441, kin-34, UniProtKB/TrEMBL:O44546, WormBase:WBGene00019815		6.04769	24.4309	1.72937	3.49706	0.000470423	0.00183179
RCEA011036	BX284602	fbxb-10	CCD63725.1, CELE_T08E11.6, EnsemblGenomes-Gn:WBGene00020362, EnsemblGenomes-Tr:T08E11.6, fbxb-10, GI:351021425, InterPro:IPR001810, InterPro:IPR012885, UniProtKB/TrEMBL:O76637, WormBase:WBGene00020362		6.0387	11.5161	2.07193	2.91453	0.00356223	0.0105914
RCEA091463	BX284606	F02E8.4	CCD83388.1, CELE_F02E8.4, EnsemblGenomes-Gn:WBGene00017177, EnsemblGenomes-Tr:F02E8.4, F02E8.4, GI:373219579, UniProtKB/TrEMBL:Q19122, WormBase:WBGene00017177		6.02853	222.427	0.82646	7.2944	2.99997e-13	9.82384e-12
RCEA006914	BX284601	C35E7.3	C35E7.3, CCD66809.1, CELE_C35E7.3, EnsemblGenomes-Gn:WBGene00016455, EnsemblGenomes-Tr:C35E7.3, GI:373219278, UniProtKB/TrEMBL:O61773, WormBase:WBGene00016455		6.02192	17.8445	1.77764	3.38759	0.000705101	0.00259996
RCEA088333	BX284605	F53F8.3	CAB04460.1, CELE_F53F8.3, EnsemblGenomes-Gn:WBGene00010000, EnsemblGenomes-Tr:F53F8.3, F53F8.3, GI:3877546, GOA:O62260, InterPro:IPR001841, InterPro:IPR013083, InterPro:IPR017907, InterPro:IPR018957, UniProtKB/TrEMBL:O62260, WormBase:WBGene00010000		6.01227	247.87	0.845254	7.11297	1.13572e-12	3.32021e-11
RCEA082906	BX284605	eol-1	CAN86644.3, CELE_T26F2.3, EnsemblGenomes-Gn:WBGene00045401, EnsemblGenomes-Tr:T26F2.3.1, EnsemblGenomes-Tr:T26F2.3.2, eol-1, GI:297374708, GOA:A5JYX9, InterPro:IPR013961, UniProtKB/TrEMBL:A5JYX9, WormBase:WBGene00045401		6.00857	72.7761	1.39768	4.29896	1.71605e-05	0.000101001
RCEA097183	BX284606	hnd-1	CAA93634.1, CELE_C44C10.8, EnsemblGenomes-Gn:WBGene00001981, EnsemblGenomes-Tr:C44C10.8, GI:3874976, GOA:Q18612, hnd-1, InterPro:IPR011598, UniProtKB/TrEMBL:Q18612, WormBase:WBGene00001981		6.00076	14.2609	2.01342	2.98037	0.00287897	0.00881813
RCEA010170	BX284602	Y39F10C.1	CELE_Y39F10C.1, CUR29999.1, GI:940795980, WormBase:WBGene00021457, Y39F10C.1		5.98938	12.8588	2.02699	2.95482	0.00312854	0.00946342
RCEA091926	BX284606	vit-2	CCD65563.1, CELE_C42D8.2, GI:351058187, vit-2, WormBase:WBGene00006926	Vitellogenin	5.98553	339213	0.759593	7.87992	3.27603e-15	1.56389e-13
RCEA098439	BX284606	fkh-4	CAB07323.2, CELE_C29F7.5, EnsemblGenomes-Gn:WBGene00001436, EnsemblGenomes-Tr:C29F7.5, fkh-4, GI:320202914, GOA:O17617, InterPro:IPR001766, InterPro:IPR011991, UniProtKB/TrEMBL:O17617, WormBase:WBGene00001436		5.97548	14.9848	1.73859	3.43697	0.000588267	0.00222239
RCEA055294	BX284604	ccch-5	CAB16528.1, ccch-5, CELE_Y57G11C.25, EnsemblGenomes-Gn:WBGene00013319, EnsemblGenomes-Tr:Y57G11C.25, GI:3881203, GOA:O18251, InterPro:IPR000571, UniProtKB/TrEMBL:O18251, WormBase:WBGene00013319		5.97395	14.141	1.66678	3.58412	0.000338219	0.00137218
RCEA074637	BX284605	ugt-14	CCD62607.1, CELE_H23N18.2, EnsemblGenomes-Gn:WBGene00019233, EnsemblGenomes-Tr:H23N18.2, GI:373218705, GOA:Q9TXZ5, InterPro:IPR002213, ugt-14, UniProtKB/TrEMBL:Q9TXZ5, WormBase:WBGene00019233	UDP-glucuronosyltransferase (EC 2.4.1.17)	5.9729	18.7145	1.86985	3.19432	0.00140159	0.00471099
RCEA009068	BX284601	fbxb-100	CAA21709.1, CELE_Y63D3A.2, EnsemblGenomes-Gn:WBGene00013403, EnsemblGenomes-Tr:Y63D3A.2, fbxb-100, GI:3881235, InterPro:IPR012885, UniProtKB/TrEMBL:Q9XWG1, WormBase:WBGene00013403		5.96991	17.4064	2.00441	2.97839	0.00289769	0.00886465
RCEA076177	BX284605	col-143	CCD68157.1, CELE_T15B7.3, col-143, EnsemblGenomes-Gn:WBGene00000716, EnsemblGenomes-Tr:T15B7.3, GI:373254198, GOA:O17038, InterPro:IPR002486, InterPro:IPR008160, UniProtKB/TrEMBL:O17038, WormBase:WBGene00000716		5.96982	20467.3	0.60874	9.80686	1.05193e-22	2.08795e-20
RCEA084868	BX284605	F14H3.6	CAB05487.2, CELE_F14H3.6, EnsemblGenomes-Gn:WBGene00008825, EnsemblGenomes-Tr:F14H3.6, F14H3.6, GI:5824456, UniProtKB/TrEMBL:O45367, WormBase:WBGene00008825		5.96054	1506.02	0.592583	10.0586	8.42158e-24	2.22876e-21
RCEA012540	BX284602	F12E12.1	CCD67479.1, CELE_F12E12.1, EnsemblGenomes-Gn:WBGene00017402, EnsemblGenomes-Tr:F12E12.1, F12E12.1, GI:351059890, UniProtKB/TrEMBL:Q9BLB9, WormBase:WBGene00017402		5.95652	42.8606	1.3912	4.28156	1.85584e-05	0.000108258
RCEA084828	BX284605	T10C6.7	CAB07663.2, CELE_T10C6.7, EnsemblGenomes-Gn:WBGene00011689, EnsemblGenomes-Tr:T10C6.7, GI:358246497, GOA:O45769, InterPro:IPR001810, T10C6.7, UniProtKB/TrEMBL:O45769, WormBase:WBGene00011689		5.95235	46.5464	1.35212	4.40224	1.07139e-05	6.6156e-05
RCEA095808	BX284606	lec-7	CAA88540.2, CELE_R07B1.2, EnsemblGenomes-Gn:WBGene00002270, EnsemblGenomes-Tr:R07B1.2.1, EnsemblGenomes-Tr:R07B1.2.2, GI:13548362, lec-7, WormBase:WBGene00002270		5.9379	15.0855	1.95789	3.03281	0.00242291	0.00761182
RCEA071265	BX284605	Y108G3AL.3	CCD74338.1, CELE_Y108G3AL.3, EnsemblGenomes-Gn:WBGene00022435, EnsemblGenomes-Tr:Y108G3AL.3, GI:373220533, InterPro:IPR023379, UniProtKB/TrEMBL:Q95Y36, WormBase:WBGene00022435, Y108G3AL.3		5.90855	108.73	0.834764	7.07811	1.46133e-12	4.12041e-11
RCEA024415	BX284603	sdz-21	CCD61767.1, CELE_F54E7.5, EnsemblGenomes-Gn:WBGene00018828, EnsemblGenomes-Tr:F54E7.5, GI:373218589, GOA:Q20783, sdz-21, UniProtKB/TrEMBL:Q20783, WormBase:WBGene00018828		5.90466	14.0949	1.85598	3.18143	0.00146552	0.00490946
RCEA088619	BX284606	AC8.1	AC8.1, CELE_AC8.1, PSEUDO:CEN20929.1		5.89001	12.6913	1.96369	2.99946	0.00270455	0.00835171
RCEA007959	BX284601	C47F8.1	C47F8.1, CAA15835.1, CELE_C47F8.1, EnsemblGenomes-Gn:WBGene00008157, EnsemblGenomes-Tr:C47F8.1, GI:3875097, InterPro:IPR001810, InterPro:IPR012885, UniProtKB/TrEMBL:O62111, WormBase:WBGene00008157		5.88458	12.7019	1.7559	3.35132	0.000804268	0.00290735
RCEA006379	BX284601	Y106G6D.1	CAA20974.2, CELE_Y106G6D.1, EnsemblGenomes-Gn:WBGene00013698, EnsemblGenomes-Tr:Y106G6D.1, GI:166157239, UniProtKB/TrEMBL:Q9XX63, WormBase:WBGene00013698, Y106G6D.1		5.87905	11.2843	1.67888	3.50178	0.000462166	0.00180476
RCEA098143	BX284606	K03A11.1	CAB00865.2, CELE_K03A11.1, EnsemblGenomes-Gn:WBGene00010519, EnsemblGenomes-Tr:K03A11.1, GI:154147291, K03A11.1, UniProtKB/TrEMBL:G5EDX0, WormBase:WBGene00010519		5.87202	11.5588	2.06619	2.84196	0.00448365	0.0129596
RCEA041527	BX284604	C49C8.3	C49C8.3, CCD67643.1, CELE_C49C8.3, EnsemblGenomes-Gn:WBGene00016767, EnsemblGenomes-Tr:C49C8.3, GI:351060017, UniProtKB/TrEMBL:Q18704, WormBase:WBGene00016767		5.86257	15.9401	1.76099	3.32913	0.000871186	0.00311714
RCEA010128	BX284602	arrd-1	arrd-1, CCD72772.1, CELE_T04B8.3, EnsemblGenomes-Gn:WBGene00020205, EnsemblGenomes-Tr:T04B8.3, GI:373220239, InterPro:IPR011021, InterPro:IPR011022, InterPro:IPR014756, UniProtKB/TrEMBL:O44847, WormBase:WBGene00020205		5.85673	45.5603	1.22073	4.79774	1.60465e-06	1.22315e-05
RCEA010833	BX284602	math-38	CCD63705.1, CELE_T07H3.3, EnsemblGenomes-Gn:WBGene00020326, EnsemblGenomes-Tr:T07H3.3, GI:373218861, GOA:D6VPA0, InterPro:IPR002083, InterPro:IPR008974, math-38, UniProtKB/TrEMBL:D6VPA0, WormBase:WBGene00020326		5.8565	17.4464	1.82346	3.21176	0.00131927	0.00446414
RCEA075899	BX284605	F46E10.2	CCD71313.1, CELE_F46E10.2, EnsemblGenomes-Gn:WBGene00018489, EnsemblGenomes-Tr:F46E10.2, F46E10.2, GI:351063227, UniProtKB/TrEMBL:G5EDS0, WormBase:WBGene00018489		5.85401	17.3022	1.66588	3.51407	0.000441297	0.00173268
RCEA030580	BX284604	Y77E11A.23	CDH93295.1, CELE_Y77E11A.23, EnsemblGenomes-Gn:WBGene00235267, EnsemblGenomes-Tr:Y77E11A.23, GI:548932511, UniProtKB/TrEMBL:U4PC24, WormBase:WBGene00235267, Y77E11A.23		5.84845	16.1025	1.74593	3.34977	0.00080878	0.00291877
RCEA029387	BX284603	F56A8.8	CAB05748.1, CELE_F56A8.8, EnsemblGenomes-Gn:WBGene00010142, EnsemblGenomes-Tr:F56A8.8, F56A8.8, GI:3877652, UniProtKB/TrEMBL:O45578, WormBase:WBGene00010142		5.84199	13.9854	1.73196	3.37306	0.000743387	0.0027192
RCEA076860	BX284605	C50E3.12	C50E3.12, CCD67749.1, CELE_C50E3.12, EnsemblGenomes-Gn:WBGene00016823, EnsemblGenomes-Tr:C50E3.12, GI:351060131, UniProtKB/TrEMBL:Q22935, WormBase:WBGene00016823		5.83845	83.1179	1.2152	4.8045	1.55135e-06	1.18612e-05
RCEA010386	BX284602	fbxc-18	CCD66355.1, CELE_C32B5.14, EnsemblGenomes-Gn:WBGene00016307, EnsemblGenomes-Tr:C32B5.14, fbxc-18, GI:351065182, InterPro:IPR021942, UniProtKB/TrEMBL:P91112, WormBase:WBGene00016307		5.82323	7.2408	1.98211	2.9379	0.00330446	0.00992985
RCEA011952	BX284602	Y25C1A.6	CCD61982.1, CELE_Y25C1A.6, EnsemblGenomes-Gn:WBGene00021293, EnsemblGenomes-Tr:Y25C1A.6, GI:351018076, UniProtKB/TrEMBL:Q9TYM3, WormBase:WBGene00021293, Y25C1A.6		5.81897	14.7551	1.80628	3.22152	0.00127512	0.00433973
RCEA076327	BX284605	drd-10	CCD66527.1, CELE_C33G8.3, drd-10, EnsemblGenomes-Gn:WBGene00016361, EnsemblGenomes-Tr:C33G8.3, GI:351058750, UniProtKB/TrEMBL:Q18400, WormBase:WBGene00016361		5.81233	10.2236	1.92707	3.01614	0.00256012	0.00797921
RCEA079415	BX284605	T21C9.13	CAA97340.2, CELE_T21C9.13, EnsemblGenomes-Gn:WBGene00011898, EnsemblGenomes-Tr:T21C9.13, GI:34555845, GOA:Q22648, T21C9.13, UniProtKB/TrEMBL:Q22648, WormBase:WBGene00011898		5.80311	390.729	0.597899	9.70584	2.84725e-22	5.23789e-20
RCEA011024	BX284602	C08F1.6	C08F1.6, CCD63714.1, CELE_C08F1.6, EnsemblGenomes-Gn:WBGene00015610, EnsemblGenomes-Tr:C08F1.6, GI:351021415, GOA:O17177, UniProtKB/TrEMBL:O17177, WormBase:WBGene00015610		5.80209	28.6832	1.34859	4.30235	1.68998e-05	9.95447e-05
RCEA010453	BX284602	fbxb-45	CCD71288.1, CELE_M01D1.10, EnsemblGenomes-Gn:WBGene00019705, EnsemblGenomes-Tr:M01D1.10, fbxb-45, GI:351063209, InterPro:IPR001810, InterPro:IPR012885, UniProtKB/TrEMBL:Q965L5, WormBase:WBGene00019705		5.80078	12.2032	1.82135	3.18489	0.00144811	0.00485547
RCEA022086	BX284603	cnc-6	CCD73783.1, CELE_Y46E12A.1, cnc-6, EnsemblGenomes-Gn:WBGene00000560, EnsemblGenomes-Tr:Y46E12A.1, GI:351051157, UniProtKB/TrEMBL:Q9N3V6, WormBase:WBGene00000560		5.79658	21.2358	1.71179	3.38627	0.000708484	0.00261116
RCEA099497	BX284606	F31F6.1	CAA93748.2, CELE_F31F6.1, EnsemblGenomes-Gn:WBGene00009300, EnsemblGenomes-Tr:F31F6.1, F31F6.1, GI:320202836, UniProtKB/TrEMBL:Q19942, WormBase:WBGene00009300		5.79504	17.298	1.81544	3.19208	0.00141253	0.0047446
RCEA079646	BX284605	D1054.11	CAA98439.1, CELE_D1054.11, D1054.11, EnsemblGenomes-Gn:WBGene00008378, EnsemblGenomes-Tr:D1054.11, GI:3875309, UniProtKB/TrEMBL:Q18947, WormBase:WBGene00008378		5.79459	23604.5	0.650913	8.90225	5.47251e-19	5.6543e-17
RCEA094623	BX284606	M60.7	CCD69430.1, CELE_M60.7, EnsemblGenomes-Gn:WBGene00019782, EnsemblGenomes-Tr:M60.7, GI:351061575, GOA:Q9GYM5, InterPro:IPR001496, InterPro:IPR002110, InterPro:IPR020683, M60.7, UniProtKB/TrEMBL:Q9GYM5, WormBase:WBGene00019782	Ankyrin repeat protein	5.79085	44.2463	1.42617	4.06041	4.89868e-05	0.00025307
RCEA080235	BX284605	clec-223	CAB03824.2, CELE_C03E10.5, clec-223, EnsemblGenomes-Gn:WBGene00007282, EnsemblGenomes-Tr:C03E10.5, GI:158936286, GOA:O17562, InterPro:IPR001304, InterPro:IPR016186, InterPro:IPR016187, UniProtKB/TrEMBL:O17562, WormBase:WBGene00007282	Extracellular serine protease precursor (EC 3.4.21.-)	5.78428	167.585	0.759242	7.61849	2.56654e-14	1.06072e-12
RCEA043770	BX284604	cyb-2.1	CAA15975.2, CELE_Y43E12A.1, cyb-2.1, EnsemblGenomes-Gn:WBGene00000866, EnsemblGenomes-Tr:Y43E12A.1, GI:14530630, GOA:O45926, InterPro:IPR004367, InterPro:IPR006671, InterPro:IPR013763, UniProtKB/TrEMBL:O45926, WormBase:WBGene00000866		5.78198	684.899	0.67769	8.53189	1.43973e-17	1.11376e-15
RCEA080243	BX284605	C03E10.3	C03E10.3, CAB03822.2, CELE_C03E10.3, EnsemblGenomes-Gn:WBGene00007281, EnsemblGenomes-Tr:C03E10.3, GI:163263189, GOA:O17559, UniProtKB/TrEMBL:O17559, WormBase:WBGene00007281		5.77667	29.0248	1.40753	4.10411	4.05869e-05	0.000214525
RCEA088593	BX284606	set-28	CCD74449.1, CELE_Y73B3B.2, EnsemblGenomes-Gn:WBGene00022224, EnsemblGenomes-Tr:Y73B3B.2, GI:351064976, InterPro:IPR001214, set-28, UniProtKB/TrEMBL:Q95XE0, WormBase:WBGene00022224		5.77371	13.6361	1.69602	3.40427	0.00066341	0.00246552
RCEA004200	BX284601	taf-11.2	CAA99885.1, CELE_K10D3.3, EnsemblGenomes-Gn:WBGene00006394, EnsemblGenomes-Tr:K10D3.3, GI:3878489, GOA:Q21417, InterPro:IPR006809, InterPro:IPR009072, taf-11.2, UniProtKB/TrEMBL:Q21417, WormBase:WBGene00006394		5.77366	62.8992	1.22254	4.72266	2.32775e-06	1.70209e-05
RCEA012074	BX284602	ZC239.14	CCD64944.1, CELE_ZC239.14, EnsemblGenomes-Gn:WBGene00022572, EnsemblGenomes-Tr:ZC239.14, GI:351050400, GOA:P91561, InterPro:IPR000210, InterPro:IPR003131, InterPro:IPR011333, UniProtKB/TrEMBL:P91561, WormBase:WBGene00022572, ZC239.14		5.77205	31.1566	1.37009	4.2129	2.52111e-05	0.000140847
RCEA045685	BX284604	scl-8	CAA94332.1, CELE_C39E9.6, EnsemblGenomes-Gn:WBGene00008030, EnsemblGenomes-Tr:C39E9.6, GI:3874841, InterPro:IPR001283, InterPro:IPR002413, InterPro:IPR014044, scl-8, UniProtKB/TrEMBL:Q18540, WormBase:WBGene00008030	Hypothetical protein	5.77098	6.32087	2.31627	2.49149	0.0127207	0.0312477
RCEA006381	BX284601	Y106G6D.2	CAA20975.1, CELE_Y106G6D.2, EnsemblGenomes-Gn:WBGene00013699, EnsemblGenomes-Tr:Y106G6D.2, GI:3880675, UniProtKB/TrEMBL:Q9XX62, WormBase:WBGene00013699, Y106G6D.2		5.77014	9.23154	1.81054	3.18697	0.00143773	0.00482279
RCEA100969	BX284606	C08A9.11	C08A9.11, CELE_C08A9.11		5.75685	11.9593	1.88414	3.05542	0.00224747	0.00712999
RCEA008157	BX284601	T07D10.8	CELE_T07D10.8, T07D10.8		5.75311	14.6259	1.69922	3.38573	0.000709895	0.00261572
RCEA091619	BX284606	ent-5	CCD67465.1, CELE_F16H11.3, EnsemblGenomes-Gn:WBGene00017532, EnsemblGenomes-Tr:F16H11.3, ent-5, GI:373219354, GOA:Q19495, InterPro:IPR002259, InterPro:IPR020846, UniProtKB/TrEMBL:Q19495, WormBase:WBGene00017532	EQUILIBRATIVE NUCLEOSIDE TRANSPORTER	5.74852	65.518	1.1853	4.84986	1.23551e-06	9.6744e-06
RCEA015113	BX284602	C44B7.5	C44B7.5, CCD61558.1, CELE_C44B7.5, EnsemblGenomes-Gn:WBGene00016627, EnsemblGenomes-Tr:C44B7.5, GI:351065576, WormBase:WBGene00016627		5.73696	1775.13	0.710407	8.0756	6.71483e-16	3.67004e-14
RCEA100988	BX284606	K09E3.5	CCD63627.1, CELE_K09E3.5, EnsemblGenomes-Gn:WBGene00019576, EnsemblGenomes-Tr:K09E3.5, GI:351021354, InterPro:IPR005020, K09E3.5, UniProtKB/TrEMBL:Q21395, WormBase:WBGene00019576		5.73692	15.2033	1.66069	3.45455	0.000551221	0.00209608
RCEA069553	BX284604	rom-3	CAB55154.2, CELE_Y116A8C.14, EnsemblGenomes-Gn:WBGene00004402, EnsemblGenomes-Tr:Y116A8C.14, GI:85539323, GOA:Q9U2S3, InterPro:IPR002610, InterPro:IPR022764, rom-3, UniProtKB/TrEMBL:Q9U2S3, WormBase:WBGene00004402		5.73567	11.0627	1.78785	3.20813	0.00133601	0.00451371
RCEA097655	BX284606	C04B4.2	C04B4.2, CAA93527.1, CELE_C04B4.2, EnsemblGenomes-Gn:WBGene00007290, EnsemblGenomes-Tr:C04B4.2, GI:3873893, UniProtKB/TrEMBL:Q17620, WormBase:WBGene00007290		5.73452	224.683	0.836652	6.85413	7.17482e-12	1.80688e-10
RCEA097667	BX284606	W06D11.3	CAA93536.1, CELE_W06D11.3, EnsemblGenomes-Gn:WBGene00012301, EnsemblGenomes-Tr:W06D11.3, GI:3880522, UniProtKB/TrEMBL:Q23198, W06D11.3, WormBase:WBGene00012301		5.73442	134.322	0.9047	6.33848	2.32044e-10	4.2532e-09
RCEA032297	BX284604	dct-7	CCD69516.1, CELE_F15E6.8, dct-7, EnsemblGenomes-Gn:WBGene00017488, EnsemblGenomes-Tr:F15E6.8, GI:351061673, UniProtKB/TrEMBL:O44494, WormBase:WBGene00017488		5.72822	22.4701	1.42726	4.01344	5.98409e-05	0.000301604
RCEA012435	BX284602	Y49F6A.5	CCD70926.1, CELE_Y49F6A.5, EnsemblGenomes-Gn:WBGene00021713, EnsemblGenomes-Tr:Y49F6A.5, GI:351062889, UniProtKB/TrEMBL:Q9N3L6, WormBase:WBGene00021713, Y49F6A.5		5.72024	15.7131	1.69816	3.3685	0.000755781	0.00275719
RCEA059192	BX284604	Y73F8A.22	CAB60550.1, CELE_Y73F8A.22, EnsemblGenomes-Gn:WBGene00013527, EnsemblGenomes-Tr:Y73F8A.22, GI:6425462, InterPro:IPR006583, UniProtKB/TrEMBL:Q9NA50, WormBase:WBGene00013527, Y73F8A.22		5.70797	8.4173	1.84302	3.09708	0.00195439	0.00631712
RCEA097334	BX284606	F54F7.6	CAA91759.1, CELE_F54F7.6, EnsemblGenomes-Gn:WBGene00010066, EnsemblGenomes-Tr:F54F7.6.1, EnsemblGenomes-Tr:F54F7.6.2, F54F7.6, GI:3877585, GOA:Q20793, UniProtKB/TrEMBL:Q20793, WormBase:WBGene00010066		5.70684	63.6358	1.20711	4.72767	2.2711e-06	1.66308e-05
RCEA020531	BX284602	Y54G11A.19	CDH92995.1, CELE_Y54G11A.19, EnsemblGenomes-Gn:WBGene00235256, EnsemblGenomes-Tr:Y54G11A.19, GI:548931431, GOA:U4PAT2, UniProtKB/TrEMBL:U4PAT2, WormBase:WBGene00235256, Y54G11A.19		5.70477	11.6248	1.80514	3.1603	0.00157608	0.00522646
RCEA087357	BX284605	F21D9.6	CELE_F21D9.6, F21D9.6		5.69747	11.2307	2.1199	2.68761	0.00719659	0.0192688
RCEA066329	BX284604	Y10G11A.90	CBJ25107.1, CELE_Y10G11A.90, EnsemblGenomes-Gn:WBGene00194949, EnsemblGenomes-Tr:Y10G11A.90, GI:285307433, UniProtKB/TrEMBL:D3DEM6, WormBase:WBGene00194949, Y10G11A.90		5.69682	11.0915	1.97325	2.88703	0.00388899	0.0114447
RCEA010503	BX284602	lips-11	CCD63489.1, CELE_T13B5.5, EnsemblGenomes-Gn:WBGene00020472, EnsemblGenomes-Tr:T13B5.5, GI:351021228, GOA:O17375, InterPro:IPR002918, InterPro:IPR029058, lips-11, UniProtKB/TrEMBL:O17375, WormBase:WBGene00020472	Lipase family	5.68808	140.315	1.14452	4.96983	6.70119e-07	5.64104e-06
RCEA012245	BX284602	T06D4.1	CCD69650.1, CELE_T06D4.1, GI:351061808, T06D4.1, UniProtKB/TrEMBL:O16649, WormBase:WBGene00020290		5.68766	382.524	0.781186	7.2808	3.31854e-13	1.08121e-11
RCEA025421	BX284603	egg-2	CCD69284.1, CELE_R01H2.3, egg-2, EnsemblGenomes-Gn:WBGene00019811, EnsemblGenomes-Tr:R01H2.3, GI:373219653, GOA:Q21629, InterPro:IPR002172, InterPro:IPR023415, UniProtKB/TrEMBL:Q21629, WormBase:WBGene00019811		5.68403	918.531	0.686679	8.27756	1.25723e-16	8.01107e-15
RCEA085044	BX284605	F21H7.12	CAD54132.1, CELE_F21H7.12, EnsemblGenomes-Gn:WBGene00009033, EnsemblGenomes-Tr:F21H7.12, F21H7.12, GI:24817296, GOA:Q8I4K8, UniProtKB/TrEMBL:Q8I4K8, WormBase:WBGene00009033		5.68354	14.6666	1.97636	2.87576	0.00403056	0.0118037
RCEA012924	BX284602	ZK430.5	CCD61673.1, CELE_ZK430.5, EnsemblGenomes-Gn:WBGene00022741, EnsemblGenomes-Tr:ZK430.5, GI:351065682, GOA:Q23491, InterPro:IPR005314, InterPro:IPR030397, UniProtKB/TrEMBL:Q23491, WormBase:WBGene00022741, ZK430.5		5.67377	12.5744	1.97796	2.86849	0.00412433	0.0120363
RCEA000110	BX284601	Y48G1BL.5	CELE_Y48G1BL.5, Y48G1BL.5	Hypothetical protein	5.67364	141.851	0.912502	6.21768	5.04561e-10	8.62959e-09
RCEA093256	BX284606	clec-266	CCD65631.1, CELE_C25B8.4, clec-266, EnsemblGenomes-Gn:WBGene00016088, EnsemblGenomes-Tr:C25B8.4b, GI:351058216, GOA:H2KZ07, InterPro:IPR001304, InterPro:IPR016186, InterPro:IPR016187, UniProtKB/TrEMBL:H2KZ07, WormBase:WBGene00016088		5.67165	127.471	0.911688	6.22104	4.93879e-10	8.45649e-09
RCEA097352	BX284606	Y62H9A.5	CAA21569.2, CELE_Y62H9A.5, EnsemblGenomes-Gn:WBGene00013393, EnsemblGenomes-Tr:Y62H9A.5, GI:21615513, UniProtKB/TrEMBL:Q9XWS6, WormBase:WBGene00013393, Y62H9A.5		5.66324	4670.2	0.778487	7.27467	3.47261e-13	1.12654e-11
RCEA084866	BX284605	F14H3.5	CAB05481.3, CELE_F14H3.5, EnsemblGenomes-Gn:WBGene00008824, EnsemblGenomes-Tr:F14H3.5, F14H3.5, GI:306438537, UniProtKB/TrEMBL:O45361, WormBase:WBGene00008824		5.65822	30.0615	1.50364	3.76301	0.00016788	0.000742225
RCEA010963	BX284602	btb-8	btb-8, CCD71255.1, CELE_F45C12.6, EnsemblGenomes-Gn:WBGene00018437, EnsemblGenomes-Tr:F45C12.6, GI:351063174, GOA:O16744, InterPro:IPR000210, InterPro:IPR011333, UniProtKB/TrEMBL:O16744, WormBase:WBGene00018437		5.65672	9.71347	1.82954	3.09188	0.00198894	0.00640819
RCEA011663	BX284602	Y47G7B.2	CCD70476.1, CELE_Y47G7B.2, EnsemblGenomes-Gn:WBGene00021654, EnsemblGenomes-Tr:Y47G7B.2, GI:351062507, GOA:Q9TZD6, UniProtKB/TrEMBL:Q9TZD6, WormBase:WBGene00021654, Y47G7B.2		5.65582	40.8776	1.52889	3.69931	0.00021619	0.000924647
RCEA017381	BX284602	T15H9.6	CAA87419.1, CELE_T15H9.6, EnsemblGenomes-Gn:WBGene00011791, EnsemblGenomes-Tr:T15H9.6, GI:3879808, GOA:Q09995, InterPro:IPR002934, InterPro:IPR007010, InterPro:IPR007012, InterPro:IPR011068, InterPro:IPR014492, T15H9.6, UniProtKB/TrEMBL:Q09995, WormBase:WBGene00011791	Poly(A) polymerase (EC 2.7.7.19)	5.64467	10.9723	1.87912	3.0039	0.00266544	0.00825579
RCEA005749	BX284601	C17E4.2	C17E4.2, CAB02745.2, CELE_C17E4.2, EnsemblGenomes-Gn:WBGene00007642, EnsemblGenomes-Tr:C17E4.2, GI:371571128, UniProtKB/TrEMBL:Q93228, WormBase:WBGene00007642		5.64123	8.8446	1.72655	3.26734	0.00108565	0.00376397
RCEA100996	BX284606	K09E3.7	CCD63629.1, CELE_K09E3.7, EnsemblGenomes-Gn:WBGene00019578, EnsemblGenomes-Tr:K09E3.7, GI:351021356, K09E3.7, UniProtKB/TrEMBL:Q21401, WormBase:WBGene00019578		5.63244	10.5452	1.79816	3.13233	0.00173426	0.00569097
RCEA016527	BX284602	aptf-4	aptf-4, CAA92669.1, CELE_F28C6.1, EnsemblGenomes-Gn:WBGene00009202, EnsemblGenomes-Tr:F28C6.1, GI:3876352, GOA:Q19863, InterPro:IPR004979, InterPro:IPR013854, UniProtKB/TrEMBL:Q19863, WormBase:WBGene00009202		5.63029	8.55282	2.11968	2.6562	0.00790267	0.020885
RCEA028794	BX284603	fbxb-24	CAB60509.1, CELE_Y56A3A.15, EnsemblGenomes-Gn:WBGene00013234, EnsemblGenomes-Tr:Y56A3A.15, fbxb-24, GI:6425396, InterPro:IPR001810, InterPro:IPR012885, UniProtKB/TrEMBL:Q9U231, WormBase:WBGene00013234		5.62482	12.401	1.73391	3.24402	0.00117857	0.00405352
RCEA101142	BX284606	F11C7.6	CCD66915.1, CELE_F11C7.6, EnsemblGenomes-Gn:WBGene00017378, EnsemblGenomes-Tr:F11C7.6a, F11C7.6, GI:351059058, InterPro:IPR000884, UniProtKB/TrEMBL:Q8MQ77, WormBase:WBGene00017378		5.62239	17.3369	1.61464	3.48213	0.000497433	0.00191962
RCEA074003	BX284605	C17E7.4	C17E7.4, CCD64869.1, CELE_C17E7.4, EnsemblGenomes-Gn:WBGene00015899, EnsemblGenomes-Tr:C17E7.4, GI:351050330, UniProtKB/TrEMBL:O16393, WormBase:WBGene00015899		5.61446	283.024	0.764505	7.34391	2.07436e-13	7.01609e-12
RCEA034004	BX284604	C24D10.5	C24D10.5, CCD61157.1, CELE_C24D10.5, EnsemblGenomes-Gn:WBGene00016056, EnsemblGenomes-Tr:C24D10.5, GI:351065212, GOA:O44132, UniProtKB/TrEMBL:O44132, WormBase:WBGene00016056		5.61249	16.7915	1.69938	3.30268	0.000957663	0.00337531
RCEA098320	BX284606	phf-33	CAA90618.2, CELE_K09A11.5, EnsemblGenomes-Gn:WBGene00010708, EnsemblGenomes-Tr:K09A11.5, GI:32440603, GOA:Q21375, InterPro:IPR001965, InterPro:IPR011011, InterPro:IPR013083, InterPro:IPR019786, InterPro:IPR019787, phf-33, UniProtKB/TrEMBL:Q21375, WormBase:WBGene00010708		5.60851	12.9919	1.74623	3.21177	0.00131919	0.00446414
RCEA011371	BX284602	fbxc-25	CCD61655.1, CELE_K09F6.8, EnsemblGenomes-Gn:WBGene00019591, EnsemblGenomes-Tr:K09F6.8, fbxc-25, GI:351065662, InterPro:IPR021942, UniProtKB/TrEMBL:O16735, WormBase:WBGene00019591		5.60749	11.0644	1.76775	3.1721	0.00151341	0.00505084
RCEA094379	BX284606	C39D10.7	C39D10.7, CCD63857.2, CELE_C39D10.7, EnsemblGenomes-Gn:WBGene00016534, EnsemblGenomes-Tr:C39D10.7.1, EnsemblGenomes-Tr:C39D10.7.2, GI:379656911, GOA:Q18529, InterPro:IPR002557, UniProtKB/TrEMBL:Q18529, WormBase:WBGene00016534		5.60108	3267.09	0.49856	11.2345	2.7597e-29	1.89227e-26
RCEA008049	BX284601	C54C8.12	C54C8.12, CAI79156.1, CELE_C54C8.12, EnsemblGenomes-Gn:WBGene00044242, EnsemblGenomes-Tr:C54C8.12, GI:62554009, UniProtKB/TrEMBL:Q564S8, WormBase:WBGene00044242		5.60009	65.3153	1.41142	3.9677	7.25697e-05	0.000357633
RCEA019765	BX284602	sra-14	CAB03051.3, CELE_F35C5.2, EnsemblGenomes-Gn:WBGene00005040, EnsemblGenomes-Tr:F35C5.2, GI:28315981, GOA:Q9XVP3, InterPro:IPR000344, sra-14, UniProtKB/TrEMBL:Q9XVP3, WormBase:WBGene00005040	Transporter	5.59936	11.0394	1.83555	3.05051	0.00228454	0.00723239
RCEA011376	BX284602	B0281.5	B0281.5, CCD61636.1, CELE_B0281.5, EnsemblGenomes-Gn:WBGene00015112, EnsemblGenomes-Tr:B0281.5a, GI:351065642, GOA:O16612, InterPro:IPR000210, InterPro:IPR003131, InterPro:IPR011333, UniProtKB/TrEMBL:O16612, WormBase:WBGene00015112		5.58674	21.6363	1.37238	4.07085	4.68414e-05	0.000243404
RCEA012552	BX284602	fbxb-91	CCD67486.1, CELE_F12E12.8, EnsemblGenomes-Gn:WBGene00044692, EnsemblGenomes-Tr:F12E12.8, fbxb-91, GI:351059897, InterPro:IPR001810, InterPro:IPR012885, UniProtKB/TrEMBL:Q2V078, WormBase:WBGene00044692		5.55785	8.63573	2.1425	2.5941	0.0094839	0.0245016
RCEA082817	BX284605	spp-12	CAB03392.1, CELE_T22G5.7, EnsemblGenomes-Gn:WBGene00004997, EnsemblGenomes-Tr:T22G5.7, GI:3880050, GOA:Q9XVI5, InterPro:IPR008139, InterPro:IPR011001, spp-12, UniProtKB/TrEMBL:Q9XVI5, WormBase:WBGene00004997		5.54348	17.2647	1.78538	3.10493	0.00190322	0.00617422
RCEA095150	BX284606	C28G1.4	C28G1.4, CCD63331.1, CELE_C28G1.4, EnsemblGenomes-Gn:WBGene00016189, EnsemblGenomes-Tr:C28G1.4, GI:351049650, GOA:Q18289, InterPro:IPR007087, InterPro:IPR015880, UniProtKB/TrEMBL:Q18289, WormBase:WBGene00016189		5.54077	11.1368	2.08938	2.65187	0.00800475	0.0211141
RCEA044707	BX284604	ZK829.9	CAA98077.1, CELE_ZK829.9, EnsemblGenomes-Gn:WBGene00014097, EnsemblGenomes-Tr:ZK829.9, GI:3881826, GOA:Q23626, InterPro:IPR005828, InterPro:IPR020846, UniProtKB/TrEMBL:Q23626, WormBase:WBGene00014097, ZK829.9		5.53955	557.091	0.578774	9.57117	1.05703e-21	1.79161e-19
RCEA016519	BX284602	puf-5	CAA90254.1, CELE_F54C9.8, EnsemblGenomes-Gn:WBGene00004241, EnsemblGenomes-Tr:F54C9.8, GI:3877504, puf-5, WormBase:WBGene00004241	Hypothetical protein	5.52792	9790.92	0.627079	8.81535	1.19316e-18	1.15377e-16
RCEA093994	BX284606	F48E3.6	CCD71305.1, CELE_F48E3.6, EnsemblGenomes-Gn:WBGene00018606, EnsemblGenomes-Tr:F48E3.6, F48E3.6, GI:373219942, GOA:Q9GP99, UniProtKB/TrEMBL:Q9GP99, WormBase:WBGene00018606		5.52406	11.1724	2.00605	2.7537	0.00589255	0.0162766
RCEA024875	BX284603	T12A2.3	CCD65210.1, CELE_T12A2.3, EnsemblGenomes-Gn:WBGene00020438, EnsemblGenomes-Tr:T12A2.3, GI:351050612, T12A2.3, UniProtKB/TrEMBL:Q22415, WormBase:WBGene00020438		5.52009	10.2557	1.7939	3.07714	0.00208995	0.00668793
RCEA049766	BX284604	F02H6.2	CAB05169.2, CELE_F02H6.2, EnsemblGenomes-Gn:WBGene00008535, EnsemblGenomes-Tr:F02H6.2, F02H6.2, GI:114420891, UniProtKB/TrEMBL:G5EFJ5, WormBase:WBGene00008535		5.51771	141.059	1.04995	5.25519	1.47869e-07	1.46078e-06
RCEA089498	BX284606	ZC53.1	CCD61691.2, CELE_ZC53.1, EnsemblGenomes-Gn:WBGene00022508, EnsemblGenomes-Tr:ZC53.1, GI:919009902, UniProtKB/TrEMBL:Q23377, WormBase:WBGene00022508, ZC53.1		5.51734	25.5368	1.5908	3.46827	0.000523819	0.00200558
RCEA017210	BX284602	arrd-2	arrd-2, CAA19538.1, CELE_Y51B9A.4, EnsemblGenomes-Gn:WBGene00013086, EnsemblGenomes-Tr:Y51B9A.4, GI:3881067, InterPro:IPR011021, InterPro:IPR011022, InterPro:IPR014756, UniProtKB/TrEMBL:Q9XXC4, WormBase:WBGene00013086		5.51621	7.98732	2.10144	2.62496	0.00866582	0.0226558
RCEA097350	BX284606	Y62H9A.4	CAA21561.1, CELE_Y62H9A.4, EnsemblGenomes-Gn:WBGene00013392, EnsemblGenomes-Tr:Y62H9A.4.1, EnsemblGenomes-Tr:Y62H9A.4.2, GI:3881221, UniProtKB/TrEMBL:Q9XWT4, WormBase:WBGene00013392, Y62H9A.4		5.51204	2480.09	0.779741	7.06906	1.55989e-12	4.3901e-11
RCEA088575	BX284606	T08D2.5	CCD74401.1, CELE_T08D2.5, EnsemblGenomes-Gn:WBGene00011610, EnsemblGenomes-Tr:T08D2.5, GI:351064970, T08D2.5, UniProtKB/TrEMBL:A4F322, WormBase:WBGene00011610		5.50834	6.95454	2.34023	2.35376	0.0185847	0.0430049
RCEA029240	BX284603	Y37D8A.19	CAA21542.1, CELE_Y37D8A.19, EnsemblGenomes-Gn:WBGene00012557, EnsemblGenomes-Tr:Y37D8A.19, GI:3925214, UniProtKB/TrEMBL:Q9XWU9, WormBase:WBGene00012557, Y37D8A.19		5.50581	3458.52	0.790215	6.96748	3.22664e-12	8.75429e-11
RCEA012060	BX284602	sdz-35	CCD64936.1, CELE_ZC239.12, EnsemblGenomes-Gn:WBGene00022570, EnsemblGenomes-Tr:ZC239.12, GI:351050392, GOA:P91555, InterPro:IPR000210, InterPro:IPR003131, InterPro:IPR011333, sdz-35, UniProtKB/TrEMBL:P91555, WormBase:WBGene00022570		5.50137	20.5099	1.66992	3.2944	0.000986319	0.00346512
RCEA079644	BX284605	D1054.10	CAA98435.1, CELE_D1054.10, D1054.10, EnsemblGenomes-Gn:WBGene00008377, EnsemblGenomes-Tr:D1054.10, GI:3875305, UniProtKB/TrEMBL:Q18943, WormBase:WBGene00008377		5.49163	7444.17	0.603424	9.10078	8.9685e-20	1.09105e-17
RCEA041644	BX284604	C33D9.5	C33D9.5, CELE_C33D9.5		5.48389	8.9577	1.9915	2.75365	0.00589346	0.0162766
RCEA099485	BX284606	C27C12.1	C27C12.1, CAA93740.1, CELE_C27C12.1, EnsemblGenomes-Gn:WBGene00007771, EnsemblGenomes-Tr:C27C12.1, GI:3892132, UniProtKB/TrEMBL:Q18249, WormBase:WBGene00007771		5.48145	105.763	0.97774	5.60625	2.0676e-08	2.50118e-07
RCEA041762	BX284604	C27B7.9	C27B7.9, CAE17700.1, CELE_C27B7.9, EnsemblGenomes-Gn:WBGene00007765, EnsemblGenomes-Tr:C27B7.9, GI:33300019, UniProtKB/TrEMBL:Q7YTR9, WormBase:WBGene00007765		5.47035	1097.5	0.541541	10.1014	5.44316e-24	1.46625e-21
RCEA011483	BX284602	ceh-86	CCD70286.1, ceh-86, CELE_F42G2.6, EnsemblGenomes-Gn:WBGene00018355, EnsemblGenomes-Tr:F42G2.6, GI:351062312, GOA:O17102, InterPro:IPR001356, InterPro:IPR009057, UniProtKB/TrEMBL:O17102, WormBase:WBGene00018355		5.46798	9.22014	1.99521	2.74055	0.00613369	0.0168483
RCEA010955	BX284602	btb-7	btb-7, CCD71262.1, CELE_F45C12.12, EnsemblGenomes-Gn:WBGene00018443, EnsemblGenomes-Tr:F45C12.12, GI:351063181, InterPro:IPR000210, InterPro:IPR011333, UniProtKB/TrEMBL:O16740, WormBase:WBGene00018443		5.45966	28.8015	1.42656	3.82714	0.000129642	0.000594062
RCEA071824	BX284605	T02B11.6	CCD72451.2, CELE_T02B11.6, EnsemblGenomes-Gn:WBGene00020157, EnsemblGenomes-Tr:T02B11.6, GI:919009091, GOA:O16976, InterPro:IPR011701, InterPro:IPR020846, T02B11.6, UniProtKB/TrEMBL:O16976, WormBase:WBGene00020157		5.45817	9.22846	2.18331	2.49995	0.0124211	0.0306491
RCEA094684	BX284606	R09F10.8	CCD69422.1, CELE_R09F10.8, EnsemblGenomes-Gn:WBGene00019989, EnsemblGenomes-Tr:R09F10.8, GI:351061568, R09F10.8, UniProtKB/TrEMBL:Q23031, WormBase:WBGene00019989		5.43989	184.582	0.981526	5.54228	2.9856e-08	3.46978e-07
RCEA095405	BX284606	Y81B9A.2	CCD62263.1, CELE_Y81B9A.2, EnsemblGenomes-Gn:WBGene00022316, EnsemblGenomes-Tr:Y81B9A.2, GI:373218647, UniProtKB/TrEMBL:Q9N4P7, WormBase:WBGene00022316, Y81B9A.2		5.43207	14.5367	1.67737	3.23845	0.00120182	0.00412314
RCEA005753	BX284601	43893	CAB02744.2, CELE_C17E4.3, EnsemblGenomes-Gn:WBGene00007643, EnsemblGenomes-Tr:C17E4.3, GI:51591871, GOA:Q93227, InterPro:IPR011016, InterPro:IPR013083, marc-3, UniProtKB/TrEMBL:Q93227, WormBase:WBGene00007643		5.42893	314.861	0.588677	9.22226	2.9089e-20	3.81572e-18
RCEA077403	BX284605	clec-219	CCD69840.1, CELE_W02D7.10, clec-219, EnsemblGenomes-Gn:WBGene00020945, EnsemblGenomes-Tr:W02D7.10, GI:351061967, GOA:Q960A6, InterPro:IPR016186, InterPro:IPR016187, UniProtKB/TrEMBL:Q960A6, WormBase:WBGene00020945		5.42136	14.2686	1.88213	2.88044	0.00397123	0.0116526
RCEA041678	BX284604	T28C6.3	CAA90994.1, CELE_T28C6.3, EnsemblGenomes-Gn:WBGene00012119, EnsemblGenomes-Tr:T28C6.3, GI:3880305, GOA:Q22845, T28C6.3, UniProtKB/TrEMBL:Q22845, WormBase:WBGene00012119		5.41831	8.31735	1.83098	2.95925	0.00308392	0.00933966
RCEA096909	BX284606	ZK455.5	CAA91490.3, CELE_ZK455.5, EnsemblGenomes-Gn:WBGene00013975, EnsemblGenomes-Tr:ZK455.5, GI:169402752, GOA:Q23499, InterPro:IPR005069, UniProtKB/TrEMBL:Q23499, WormBase:WBGene00013975, ZK455.5		5.41412	8.70342	2.00356	2.70226	0.00688709	0.0185786
RCEA045914	BX284604	srsx-25	CAB60603.1, CELE_Y62E10A.4, GI:6425501, GOA:Q9U1X1, InterPro:IPR000276, InterPro:IPR017452, InterPro:IPR019424, srsx-25, UniProtKB/TrEMBL:Q9U1X1, WormBase:WBGene00013375		5.4068	8.62443	1.79441	3.01314	0.00258557	0.00804358
RCEA027314	BX284603	C48B4.12	C48B4.12, CAA82385.1, CELE_C48B4.12, EnsemblGenomes-Gn:WBGene00008175, EnsemblGenomes-Tr:C48B4.12b, GI:3875026, UniProtKB/TrEMBL:G5EFZ6, WormBase:WBGene00008175		5.4032	25.5271	1.99456	2.70896	0.00674942	0.018266
RCEA012476	BX284602	sea-1	CCD69699.1, CELE_F19B10.9, EnsemblGenomes-Gn:WBGene00004750, EnsemblGenomes-Tr:F19B10.9, GI:351061846, sea-1, WormBase:WBGene00004750		5.40157	67.5834	1.03923	5.19765	2.01822e-07	1.9397e-06
RCEA010928	BX284602	fbxb-26	CCD71268.1, CELE_F58E1.3, EnsemblGenomes-Gn:WBGene00019035, EnsemblGenomes-Tr:F58E1.3, fbxb-26, GI:351063188, InterPro:IPR012885, UniProtKB/TrEMBL:Q9TZG6, WormBase:WBGene00019035		5.39911	9.33218	1.91763	2.81551	0.00486997	0.013903
RCEA015325	BX284602	F10E7.11	CCD69171.1, CELE_F10E7.11, EnsemblGenomes-Gn:WBGene00017352, EnsemblGenomes-Tr:F10E7.11, F10E7.11, GI:351061396, GOA:Q19306, InterPro:IPR000949, InterPro:IPR001005, InterPro:IPR009057, UniProtKB/TrEMBL:Q19306, WormBase:WBGene00017352		5.39672	11.5943	2.33384	2.31238	0.0207567	0.0472056
RCEA045959	BX284604	aptf-2	aptf-2, CCD31155.1, CELE_Y62E10A.17, GI:345107482, GOA:G2HK15, InterPro:IPR004979, InterPro:IPR013854, UniProtKB/TrEMBL:G2HK15, WormBase:WBGene00013383		5.38588	144.151	0.728616	7.39193	1.44718e-13	5.10062e-12
RCEA095138	BX284606	C28G1.2	C28G1.2, CCD63329.1, CELE_C28G1.2, EnsemblGenomes-Gn:WBGene00016187, EnsemblGenomes-Tr:C28G1.2, GI:351049648, GOA:Q18287, InterPro:IPR023796, UniProtKB/TrEMBL:Q18287, WormBase:WBGene00016187		5.38384	16.6875	1.84398	2.91968	0.00350394	0.0104398
RCEA001978	BX284601	abf-2	abf-2, CCD67778.1, CELE_C50F2.10, GI:351060147, WormBase:WBGene00000013		5.37945	134.609	0.895287	6.00863	1.87099e-09	2.80278e-08
RCEA008586	BX284601	F44F1.6	CAB54248.1, CELE_F44F1.6, EnsemblGenomes-Gn:WBGene00009698, EnsemblGenomes-Tr:F44F1.6a, F44F1.6, GI:5824502, GOA:Q9U3F0, UniProtKB/TrEMBL:Q9U3F0, WormBase:WBGene00009698		5.37823	9.41245	1.83376	2.9329	0.00335814	0.0100571
RCEA008172	BX284601	ntr-1	CAB04712.1, CELE_T07D10.2, EnsemblGenomes-Gn:WBGene00011582, EnsemblGenomes-Tr:T07D10.2, GI:3879621, GOA:O02300, InterPro:IPR000276, InterPro:IPR017452, ntr-1, UniProtKB/TrEMBL:O02300, WormBase:WBGene00011582		5.37454	18.8237	1.94419	2.7644	0.00570271	0.0158272
RCEA013345	BX284602	F59A6.5	CCD70465.1, CELE_F59A6.5, EnsemblGenomes-Gn:WBGene00019087, EnsemblGenomes-Tr:F59A6.5, F59A6.5, GI:351062496, GOA:Q21025, InterPro:IPR001180, InterPro:IPR001849, InterPro:IPR002219, InterPro:IPR011993, UniProtKB/TrEMBL:Q21025, WormBase:WBGene00019087		5.37381	591.894	0.577265	9.30908	1.28942e-20	1.801e-18
RCEA001086	BX284601	zeel-1	CCD69903.1, CELE_Y39G10AR.5, EnsemblGenomes-Gn:WBGene00021463, EnsemblGenomes-Tr:Y39G10AR.5, GI:351062028, GOA:Q95XQ4, UniProtKB/TrEMBL:Q95XQ4, WormBase:WBGene00021463, zeel-1		5.36656	9.03417	1.92924	2.7817	0.00540756	0.0151603
RCEA090675	BX284606	ZK813.7	CCD63041.1, CELE_ZK813.7, EnsemblGenomes-Gn:WBGene00045394, EnsemblGenomes-Tr:ZK813.7.1, EnsemblGenomes-Tr:ZK813.7.2, GI:351021029, UniProtKB/TrEMBL:A5HU91, WormBase:WBGene00045394, ZK813.7		5.36633	2297.37	0.74846	7.16983	7.50929e-13	2.27009e-11
RCEA085298	BX284605	srr-3	CAB04315.1, CELE_F36D3.3, EnsemblGenomes-Gn:WBGene00005654, EnsemblGenomes-Tr:F36D3.3, GI:3876794, GOA:O45459, InterPro:IPR004950, srr-3, UniProtKB/TrEMBL:O45459, WormBase:WBGene00005654		5.36388	6.56508	1.94732	2.75449	0.00587832	0.0162467
RCEA053174	BX284604	F13G11.3	CAL49433.1, CELE_F13G11.3, EnsemblGenomes-Gn:WBGene00045038, EnsemblGenomes-Tr:F13G11.3, F13G11.3, GI:115530288, UniProtKB/TrEMBL:Q067X2, WormBase:WBGene00045038		5.36161	1810.14	0.77136	6.95085	3.63083e-12	9.71118e-11
RCEA023405	BX284603	R10E4.6	CAA90767.2, CELE_R10E4.6, EnsemblGenomes-Gn:WBGene00011202, EnsemblGenomes-Tr:R10E4.6, GI:224490509, GOA:Q21903, R10E4.6, UniProtKB/TrEMBL:Q21903, WormBase:WBGene00011202		5.3583	10.2249	2.03306	2.63559	0.0083992	0.0220428
RCEA029960	BX284604	gpa-4	CCD73978.1, CELE_T07A9.7, EnsemblGenomes-Gn:WBGene00001666, EnsemblGenomes-Tr:T07A9.7, GI:351064945, gpa-4, WormBase:WBGene00001666	Guanine nucleotide-binding protein alpha subunit	5.34795	12.596	2.10586	2.53955	0.0110995	0.0279666
RCEA012528	BX284602	C46E10.9	C46E10.9, CCD67477.1, CELE_C46E10.9, EnsemblGenomes-Gn:WBGene00016713, EnsemblGenomes-Tr:C46E10.9, GI:351059887, GOA:O44720, InterPro:IPR007087, InterPro:IPR013087, InterPro:IPR015880, UniProtKB/TrEMBL:O44720, WormBase:WBGene00016713	C2H2 type zinc finger protein	5.33042	15.5615	1.76656	3.0174	0.00254949	0.00794938
RCEA085762	BX284605	T05E12.8	CAM84811.1, CELE_T05E12.8, EnsemblGenomes-Gn:WBGene00045382, EnsemblGenomes-Tr:T05E12.8, GI:145292039, GOA:A4UVL7, T05E12.8, UniProtKB/TrEMBL:A4UVL7, WormBase:WBGene00045382		5.32818	10.5852	1.95968	2.71891	0.00654974	0.017828
RCEA007035	BX284601	mltn-2	CAB63389.3, CELE_Y52B11A.7, EnsemblGenomes-Gn:WBGene00013126, EnsemblGenomes-Tr:Y52B11A.7, GI:172051522, GOA:Q9U257, InterPro:IPR006954, mltn-2, UniProtKB/TrEMBL:Q9U257, WormBase:WBGene00013126		5.30628	11.0744	2.19102	2.42183	0.0154424	0.0368531
RCEA041316	BX284604	F17E9.4	CCD68528.1, CELE_F17E9.4, EnsemblGenomes-Gn:WBGene00017541, EnsemblGenomes-Tr:F17E9.4, F17E9.4, GI:351060794, InterPro:IPR008588, UniProtKB/TrEMBL:O61522, WormBase:WBGene00017541		5.30188	771.625	0.800951	6.61948	3.60468e-11	7.90358e-10
RCEA011000	BX284602	F36H5.4	CCD63734.1, CELE_F36H5.4, EnsemblGenomes-Gn:WBGene00018103, EnsemblGenomes-Tr:F36H5.4, F36H5.4, GI:351021435, GOA:P91297, UniProtKB/TrEMBL:P91297, WormBase:WBGene00018103		5.29562	7.49185	2.05959	2.5712	0.0101347	0.0259526
RCEA074346	BX284605	F13A2.2	CCD69364.2, CELE_F13A2.2, EnsemblGenomes-Gn:WBGene00017411, EnsemblGenomes-Tr:F13A2.2, F13A2.2, GI:373254594, UniProtKB/TrEMBL:O16895, WormBase:WBGene00017411		5.29373	14.6503	1.71602	3.08489	0.00203627	0.0065439
RCEA023570	BX284603	cpg-1	CAA83679.1, CELE_C07G2.1, cpg-1, GI:3874082, WormBase:WBGene00000465		5.29083	17960.1	0.49528	10.6825	1.22917e-26	5.29773e-24
RCEA074770	BX284605	Y58A7A.5	CCD63024.1, CELE_Y58A7A.5, EnsemblGenomes-Gn:WBGene00021979, EnsemblGenomes-Tr:Y58A7A.5, GI:351021018, GOA:Q966A4, UniProtKB/TrEMBL:Q966A4, WormBase:WBGene00021979, Y58A7A.5		5.29059	1526.38	0.622391	8.50042	1.88901e-17	1.40373e-15
RCEA028942	BX284603	Y75B8A.18	CAQ48408.1, CELE_Y75B8A.18, GI:186929437, UniProtKB/TrEMBL:B2FDA5, WormBase:WBGene00013553, Y75B8A.18		5.2843	63.4118	1.11907	4.72205	2.33479e-06	1.70583e-05
RCEA012747	BX284602	W06A11.4	CCD73311.1, CELE_W06A11.4, EnsemblGenomes-Gn:WBGene00021055, EnsemblGenomes-Tr:W06A11.4, GI:351064820, UniProtKB/TrEMBL:Q23180, W06A11.4, WormBase:WBGene00021055		5.28328	11.1445	1.81275	2.9145	0.00356254	0.0105914
RCEA072309	BX284605	Y46H3C.5	CCD72655.1, CELE_Y46H3C.5, EnsemblGenomes-Gn:WBGene00021605, EnsemblGenomes-Tr:Y46H3C.5, GI:351064299, UniProtKB/TrEMBL:Q9N4W2, WormBase:WBGene00021605, Y46H3C.5		5.28132	6.59661	2.27288	2.32362	0.0201459	0.0460152
RCEA077178	BX284605	oma-2	CCD64069.1, CELE_ZC513.6, EnsemblGenomes-Gn:WBGene00003865, EnsemblGenomes-Tr:ZC513.6, GI:351049995, GOA:Q23359, InterPro:IPR000571, oma-2, UniProtKB/TrEMBL:Q23359, WormBase:WBGene00003865		5.27505	3988.21	0.601611	8.76821	1.81531e-18	1.69037e-16
RCEA051521	BX284604	F55B11.3	CAB05903.3, CELE_F55B11.3, EnsemblGenomes-Gn:WBGene00010085, EnsemblGenomes-Tr:F55B11.3, F55B11.3, GI:38422350, UniProtKB/TrEMBL:O17893, WormBase:WBGene00010085		5.27296	2215.1	0.71708	7.35339	1.93247e-13	6.64039e-12
RCEA094767	BX284606	F08F1.4	CCD69026.1, CELE_F08F1.4, EnsemblGenomes-Gn:WBGene00017258, EnsemblGenomes-Tr:F08F1.4a, F08F1.4, GI:351061252, UniProtKB/TrEMBL:H2KZN5, WormBase:WBGene00017258		5.26692	145.347	0.820314	6.42062	1.35721e-10	2.63155e-09
RCEA029978	BX284604	daf-18	CCD73977.1, CELE_T07A9.6, daf-18, EnsemblGenomes-Gn:WBGene00000913, EnsemblGenomes-Tr:T07A9.6, GI:351064944, GOA:G5EE01, InterPro:IPR000242, InterPro:IPR014020, InterPro:IPR016130, InterPro:IPR029021, InterPro:IPR029023, UniProtKB/TrEMBL:G5EE01, WormBase:WBGene00000913		5.26524	2382.64	0.495914	10.6172	2.47779e-26	1.0102e-23
RCEA042424	BX284604	trcs-1	CAA92464.1, CELE_F27C8.6, EnsemblGenomes-Gn:WBGene00009186, EnsemblGenomes-Tr:F27C8.6.1, EnsemblGenomes-Tr:F27C8.6.2, GI:3876350, GOA:Q19839, InterPro:IPR013094, InterPro:IPR017157, InterPro:IPR029058, trcs-1, UniProtKB/TrEMBL:Q19839, WormBase:WBGene00009186		5.26193	3119.08	0.546964	9.62024	6.56755e-22	1.16555e-19
RCEA085320	BX284605	Y32B12B.1	CBX53343.1, CELE_Y32B12B.1, EnsemblGenomes-Gn:WBGene00012521, EnsemblGenomes-Tr:Y32B12B.1a, GI:310910993, GOA:E3CTH2, UniProtKB/TrEMBL:E3CTH2, WormBase:WBGene00012521, Y32B12B.1		5.25855	4.73094	2.22079	2.36788	0.0178905	0.0416139
RCEA008117	BX284601	W02D9.6	CAB03463.1, CELE_W02D9.6, EnsemblGenomes-Gn:WBGene00012212, EnsemblGenomes-Tr:W02D9.6, GI:3880406, UniProtKB/TrEMBL:Q9XVH0, W02D9.6, WormBase:WBGene00012212		5.25477	679.442	0.688392	7.63341	2.28627e-14	9.55358e-13
RCEA028971	BX284603	Y75B8A.39	CAH19095.1, CELE_Y75B8A.39, EnsemblGenomes-Gn:WBGene00023483, EnsemblGenomes-Tr:Y75B8A.39, GI:51587635, UniProtKB/TrEMBL:Q67X95, WormBase:WBGene00023483, Y75B8A.39		5.24697	16.9526	1.72834	3.03583	0.00239871	0.00754472
RCEA010458	BX284602	fbxb-40	CCD71287.1, CELE_M01D1.9, EnsemblGenomes-Gn:WBGene00019704, EnsemblGenomes-Tr:M01D1.9, fbxb-40, GI:351063208, InterPro:IPR012885, UniProtKB/TrEMBL:O17231, WormBase:WBGene00019704		5.24477	5.75049	1.98138	2.64704	0.00812009	0.0213735
RCEA094770	BX284606	ced-8	CCD69028.1, ced-8, CELE_F08F1.5, EnsemblGenomes-Gn:WBGene00000422, EnsemblGenomes-Tr:F08F1.5, GI:351061254, WormBase:WBGene00000422		5.2393	11.2647	1.95016	2.68659	0.00721845	0.0193171
RCEA015256	BX284602	cin-4	CCD73727.1, CELE_ZK1127.7, cin-4, EnsemblGenomes-Gn:WBGene00022854, EnsemblGenomes-Tr:ZK1127.7, GI:373220462, GOA:G5ECQ8, InterPro:IPR001241, InterPro:IPR002205, InterPro:IPR013757, InterPro:IPR013758, InterPro:IPR013759, InterPro:IPR013760, InterPro:IPR018522, InterPro:IPR024946, InterPro:IPR031660, UniProtKB/TrEMBL:G5ECQ8, WormBase:WBGene00022854		5.2369	185.945	0.663488	7.89299	2.95032e-15	1.4219e-13
RCEA092670	BX284606	egl-6	CCD67505.1, CELE_C46F4.1, egl-6, EnsemblGenomes-Gn:WBGene00001175, EnsemblGenomes-Tr:C46F4.1a.1, EnsemblGenomes-Tr:C46F4.1a.2, GI:351059912, GOA:G5EFX1, InterPro:IPR000276, InterPro:IPR017452, InterPro:IPR019427, UniProtKB/TrEMBL:G5EFX1, WormBase:WBGene00001175		5.23416	11.438	1.87766	2.78759	0.00531011	0.014939
RCEA013038	BX284602	clec-137	CCD70535.1, CELE_F35D11.8, clec-137, EnsemblGenomes-Gn:WBGene00018048, EnsemblGenomes-Tr:F35D11.8, GI:373254352, GOA:Q20037, InterPro:IPR001304, InterPro:IPR016187, UniProtKB/TrEMBL:Q20037, WormBase:WBGene00018048		5.22862	10.9039	1.83151	2.85481	0.0043063	0.0124996
RCEA090021	BX284606	ttr-42	CCD71666.1, CELE_H01M10.3, EnsemblGenomes-Gn:WBGene00045268, EnsemblGenomes-Tr:H01M10.3, GI:351063482, GOA:A2V8C3, InterPro:IPR001534, ttr-42, UniProtKB/TrEMBL:A2V8C3, WormBase:WBGene00045268		5.2271	198.926	0.777897	6.71953	1.82308e-11	4.21152e-10
RCEA028744	BX284603	C18D11.7	C18D11.7, CAI79117.1, CELE_C18D11.7, EnsemblGenomes-Gn:WBGene00044232, EnsemblGenomes-Tr:C18D11.7, GI:62554051, InterPro:IPR000210, InterPro:IPR011333, UniProtKB/TrEMBL:G5ED70, WormBase:WBGene00044232		5.22408	11.4186	1.89881	2.75124	0.00593693	0.0163787
RCEA044138	BX284604	cbd-1	CAB07215.2, cbd-1, CELE_H02I12.1, EnsemblGenomes-Gn:WBGene00010351, EnsemblGenomes-Tr:H02I12.1, GI:54110967, GOA:O45599, InterPro:IPR002557, UniProtKB/TrEMBL:O45599, WormBase:WBGene00010351		5.21468	22804.6	0.5798	8.99394	2.38529e-19	2.68524e-17
RCEA043516	BX284604	R102.6	CAA94360.2, CELE_R102.6, EnsemblGenomes-Gn:WBGene00011293, EnsemblGenomes-Tr:R102.6, GI:186929593, GOA:Q21892, R102.6, UniProtKB/TrEMBL:Q21892, WormBase:WBGene00011293		5.21427	9.61283	1.87418	2.78216	0.00539986	0.0151534
RCEA090512	BX284606	fbxb-71	CCD70140.1, CELE_F40F4.1, EnsemblGenomes-Gn:WBGene00018236, EnsemblGenomes-Tr:F40F4.1, fbxb-71, GI:351062229, InterPro:IPR001810, InterPro:IPR012885, UniProtKB/TrEMBL:Q20225, WormBase:WBGene00018236		5.21026	5.15751	2.27574	2.28948	0.0220515	0.0497304
RCEA095948	BX284606	ZC373.2	CAA88974.2, CELE_ZC373.2, EnsemblGenomes-Gn:WBGene00013867, EnsemblGenomes-Tr:ZC373.2, GI:371570795, UniProtKB/TrEMBL:Q23258, WormBase:WBGene00013867, ZC373.2		5.20482	2812.86	0.732195	7.10851	1.17303e-12	3.42265e-11
RCEA041235	BX284604	vit-6	CCD70605.1, CELE_K07H8.6, GI:373254378, vit-6, WormBase:WBGene00006930	Vitellogenin	5.20414	247502	0.793242	6.5606	5.35922e-11	1.12283e-09
RCEA095774	BX284606	F36G3.3	CAE17781.2, CELE_F36G3.3, EnsemblGenomes-Gn:WBGene00009484, EnsemblGenomes-Tr:F36G3.3, F36G3.3, GI:242342421, GOA:Q7YX40, InterPro:IPR006629, UniProtKB/TrEMBL:Q7YX40, WormBase:WBGene00009484		5.20146	33.435	1.48082	3.51255	0.000443825	0.00173989
RCEA011635	BX284602	F22E5.17	CCD68468.1, CELE_F22E5.17, EnsemblGenomes-Gn:WBGene00017712, EnsemblGenomes-Tr:F22E5.17, F22E5.17, GI:373254228, InterPro:IPR012885, UniProtKB/TrEMBL:Q95X85, WormBase:WBGene00017712		5.19695	93.8004	1.03951	4.99943	5.75014e-07	4.91279e-06
RCEA018876	BX284602	F54D5.5	CAI46602.1, CELE_F54D5.5, EnsemblGenomes-Gn:WBGene00010051, EnsemblGenomes-Tr:F54D5.5b, F54D5.5, GI:58081970, UniProtKB/TrEMBL:Q5FC73, WormBase:WBGene00010051		5.19363	389.774	0.61621	8.42833	3.50633e-17	2.47164e-15
RCEA087089	BX284605	Y17D7B.3	CAA16300.1, CELE_Y17D7B.3, EnsemblGenomes-Gn:WBGene00012451, EnsemblGenomes-Tr:Y17D7B.3, GI:3880702, UniProtKB/TrEMBL:O45911, WormBase:WBGene00012451, Y17D7B.3		5.19158	31.2969	1.64567	3.15468	0.00160674	0.00531646
RCEA019863	BX284602	puf-6	CAB04133.1, CELE_F18A11.1, EnsemblGenomes-Gn:WBGene00004242, EnsemblGenomes-Tr:F18A11.1.1, EnsemblGenomes-Tr:F18A11.1.2, GI:3876074, puf-6, WormBase:WBGene00004242	Hypothetical protein	5.17371	1038.45	0.991682	5.21711	1.81741e-07	1.76306e-06
RCEA044770	BX284604	T12G3.6	CCE72213.1, CELE_T12G3.6, GI:358246337, T12G3.6, UniProtKB/TrEMBL:H2L295, WormBase:WBGene00011741		5.17139	355.549	0.875465	5.90703	3.48336e-09	4.925e-08
RCEA082671	BX284605	fbxa-181	CAB04271.1, CELE_F35E12.3, EnsemblGenomes-Gn:WBGene00009427, EnsemblGenomes-Tr:F35E12.3, fbxa-181, GI:3876739, InterPro:IPR001810, InterPro:IPR002900, UniProtKB/TrEMBL:O02356, WormBase:WBGene00009427		5.16972	17.9902	1.78398	2.89786	0.00375721	0.0111067
RCEA008131	BX284601	F33E2.10	CAQ76473.1, CELE_F33E2.10, EnsemblGenomes-Gn:WBGene00077769, EnsemblGenomes-Tr:F33E2.10, F33E2.10, GI:193248196, UniProtKB/TrEMBL:B3WFY9, WormBase:WBGene00077769		5.16763	7.06226	2.23489	2.31226	0.0207635	0.0472141
RCEA090634	BX284606	ZK563.7	CCD63047.1, CELE_ZK563.7, EnsemblGenomes-Gn:WBGene00044355, EnsemblGenomes-Tr:ZK563.7, GI:373218765, GOA:Q4TTB1, InterPro:IPR009283, UniProtKB/TrEMBL:Q4TTB1, WormBase:WBGene00044355, ZK563.7		5.163	25.6135	1.44235	3.57957	0.000344157	0.00139335
RCEA015115	BX284602	slc-36.5	CCD61559.1, CELE_C44B7.6, EnsemblGenomes-Gn:WBGene00016628, EnsemblGenomes-Tr:C44B7.6a.1, EnsemblGenomes-Tr:C44B7.6a.2, GI:351065577, GOA:Q18595, InterPro:IPR013057, slc-36.5, UniProtKB/TrEMBL:Q18595, WormBase:WBGene00016628	Amino acid transporter	5.16079	23.4058	1.57933	3.2677	0.00108426	0.00376088
RCEA070025	BX284604	athp-3	athp-3, CAB55128.1, CELE_Y116A8C.22, EnsemblGenomes-Gn:WBGene00013799, EnsemblGenomes-Tr:Y116A8C.22, GI:5832790, GOA:Q9U2U9, InterPro:IPR001965, InterPro:IPR011011, InterPro:IPR013083, InterPro:IPR017956, InterPro:IPR020478, UniProtKB/TrEMBL:Q9U2U9, WormBase:WBGene00013799		5.16063	11.6159	1.7614	2.92984	0.00339133	0.0101425
RCEA087193	BX284605	sws-1	CAD31831.2, CELE_Y39B6A.40, EnsemblGenomes-Gn:WBGene00012698, EnsemblGenomes-Tr:Y39B6A.40, GI:31043905, GOA:Q8MYM5, InterPro:IPR007527, sws-1, UniProtKB/TrEMBL:Q8MYM5, WormBase:WBGene00012698		5.15784	21.2145	1.64108	3.14295	0.00167256	0.00551246
RCEA030870	BX284604	R05C11.2	CCD65357.1, CELE_R05C11.2, EnsemblGenomes-Gn:WBGene00019874, EnsemblGenomes-Tr:R05C11.2, GI:351050752, InterPro:IPR001810, InterPro:IPR002900, R05C11.2, UniProtKB/TrEMBL:Q9TYQ1, WormBase:WBGene00019874		5.15389	6.82438	1.90534	2.70497	0.00683105	0.0184473
RCEA075020	BX284605	ZC317.7	CCD69055.1, CELE_ZC317.7, EnsemblGenomes-Gn:WBGene00022590, EnsemblGenomes-Tr:ZC317.7, GI:373219614, UniProtKB/TrEMBL:Q23079, WormBase:WBGene00022590, ZC317.7		5.14796	38.3044	1.22504	4.20229	2.64233e-05	0.000146812
RCEA086541	BX284605	fbxa-107	CAB60569.1, CELE_Y37H2A.4, EnsemblGenomes-Gn:WBGene00012564, EnsemblGenomes-Tr:Y37H2A.4, fbxa-107, GI:6425279, InterPro:IPR001810, InterPro:IPR002900, UniProtKB/TrEMBL:Q9U2P1, WormBase:WBGene00012564		5.14275	216.452	0.745325	6.90001	5.19987e-12	1.34204e-10
RCEA012958	BX284602	W06B4.1	CCD73639.1, CELE_W06B4.1, EnsemblGenomes-Gn:WBGene00021056, EnsemblGenomes-Tr:W06B4.1, GI:373254551, UniProtKB/TrEMBL:Q23196, W06B4.1, WormBase:WBGene00021056		5.13941	710.39	0.68412	7.51244	5.80341e-14	2.26213e-12
RCEA078109	BX284605	pitr-3	CCD61416.1, CELE_B0222.3, EnsemblGenomes-Gn:WBGene00015055, EnsemblGenomes-Tr:B0222.3, GI:351065449, GOA:Q17455, InterPro:IPR001204, pitr-3, UniProtKB/TrEMBL:Q17455, WormBase:WBGene00015055	Sodium-dependent phosphate transporter	5.13419	97.5336	1.2471	4.11688	3.84028e-05	0.000204197
RCEA045319	BX284604	let-99	CAB01225.1, CELE_K08E7.3, EnsemblGenomes-Gn:WBGene00002368, EnsemblGenomes-Tr:K08E7.3, GI:3878411, let-99, WormBase:WBGene00002368		5.13167	1004.81	0.600079	8.55166	1.21331e-17	9.53272e-16
RCEA001151	BX284601	inx-19	CCD69899.1, CELE_T16H5.1, GI:351062023, inx-19, WormBase:WBGene00002141	Gap junction-forming innexin protein	5.13008	6.75948	2.03301	2.52339	0.0116229	0.0290139
RCEA017575	BX284602	chil-8	CAA91153.1, CELE_C08H9.14, chil-8, EnsemblGenomes-Gn:WBGene00007473, EnsemblGenomes-Tr:C08H9.14, GI:3874132, GOA:Q17840, InterPro:IPR001223, InterPro:IPR011583, InterPro:IPR013781, InterPro:IPR017853, UniProtKB/TrEMBL:Q17840, WormBase:WBGene00007473	Hypothetical protein	5.12191	6.26146	2.12611	2.40905	0.0159939	0.0378757
RCEA076592	BX284605	F10G2.4	CCD62812.1, CELE_F10G2.4, EnsemblGenomes-Gn:WBGene00017365, EnsemblGenomes-Tr:F10G2.4, F10G2.4, GI:351020834, UniProtKB/TrEMBL:Q22954, WormBase:WBGene00017365		5.1162	7.96374	2.14498	2.3852	0.01707	0.0400718
RCEA076074	BX284605	W02F12.1	CELE_W02F12.1, W02F12.1		5.11591	7.7917	1.98595	2.57605	0.00999352	0.0256482
RCEA001041	BX284601	Y39G10AL.1	CCD69306.1, CELE_Y39G10AL.1, EnsemblGenomes-Gn:WBGene00021458, EnsemblGenomes-Tr:Y39G10AL.1a, GI:373219660, UniProtKB/TrEMBL:Q9N402, WormBase:WBGene00021458, Y39G10AL.1		5.1137	7.23232	1.90781	2.6804	0.00735335	0.0196131
RCEA004054	BX284601	C48B6.9	C48B6.9, CCD67586.1, CELE_C48B6.9, EnsemblGenomes-Gn:WBGene00016745, EnsemblGenomes-Tr:C48B6.9, GI:373219376, GOA:O01515, InterPro:IPR029201, UniProtKB/TrEMBL:O01515, WormBase:WBGene00016745		5.1109	106.379	0.780625	6.54719	5.863e-11	1.22159e-09
RCEA001710	BX284601	enu-3.4	CCD70008.1, CELE_W05F2.2, EnsemblGenomes-Gn:WBGene00021034, EnsemblGenomes-Tr:W05F2.2, enu-3.4, GI:373254309, GOA:Q9TYT9, UniProtKB/TrEMBL:Q9TYT9, WormBase:WBGene00021034		5.10958	7.95522	2.16951	2.35518	0.0185137	0.0428796
RCEA000104	BX284601	puf-10	CELE_Y48G1BL.3, puf-10	Hypothetical protein	5.10352	622.445	0.76668	6.65665	2.80143e-11	6.26997e-10
RCEA071319	BX284605	R02C2.6	CCD68554.1, CELE_R02C2.6, EnsemblGenomes-Gn:WBGene00019817, EnsemblGenomes-Tr:R02C2.6, GI:351060809, GOA:Q86S44, InterPro:IPR000719, InterPro:IPR002290, InterPro:IPR008271, InterPro:IPR011009, InterPro:IPR017441, R02C2.6, UniProtKB/TrEMBL:Q86S44, WormBase:WBGene00019817		5.10268	8.1566	1.9876	2.56726	0.0102507	0.0262088
RCEA012205	BX284602	F14D2.15	CCD69489.1, CELE_F14D2.15, EnsemblGenomes-Gn:WBGene00023427, EnsemblGenomes-Tr:F14D2.15, F14D2.15, GI:351061643, InterPro:IPR000210, InterPro:IPR011333, UniProtKB/TrEMBL:Q6A584, WormBase:WBGene00023427		5.08774	46.2527	1.25258	4.0618	4.86952e-05	0.000251823
RCEA005951	BX284601	K07A1.6	CAB03176.1, CELE_K07A1.6, EnsemblGenomes-Gn:WBGene00010613, EnsemblGenomes-Tr:K07A1.6, GI:3878340, InterPro:IPR002919, K07A1.6, UniProtKB/TrEMBL:P90911, WormBase:WBGene00010613		5.08368	503.486	0.871664	5.83216	5.47147e-09	7.44248e-08
RCEA024313	BX284603	nekl-4	CCD68375.1, CELE_D1044.8, EnsemblGenomes-Gn:WBGene00017033, EnsemblGenomes-Tr:D1044.8, GI:351060657, nekl-4, WormBase:WBGene00017033		5.06654	5.62716	2.17366	2.33088	0.0197595	0.0452652
RCEA086127	BX284605	scl-24	CAA16500.1, CELE_F08E10.7, EnsemblGenomes-Gn:WBGene00008575, EnsemblGenomes-Tr:F08E10.7, GI:3875669, InterPro:IPR001283, InterPro:IPR014044, scl-24, UniProtKB/TrEMBL:Q9XXP4, WormBase:WBGene00008575		5.06452	5.76445	2.02466	2.50141	0.0123698	0.0305549
RCEA073999	BX284605	C17E7.9	C17E7.9, CCD64874.1, CELE_C17E7.9, EnsemblGenomes-Gn:WBGene00015903, EnsemblGenomes-Tr:C17E7.9a, GI:351050335, GOA:Q965M7, UniProtKB/TrEMBL:Q965M7, WormBase:WBGene00015903		5.05953	210.797	0.826807	6.11936	9.39524e-10	1.52723e-08
RCEA016139	BX284602	lron-4	CAA88103.2, CELE_C41C4.3, EnsemblGenomes-Gn:WBGene00008051, EnsemblGenomes-Tr:C41C4.3, GI:25004912, InterPro:IPR001611, lron-4, UniProtKB/TrEMBL:Q09498, WormBase:WBGene00008051		5.052	9.95341	1.87893	2.68877	0.00717155	0.0192086
RCEA041324	BX284604	F17E9.2	CCD68526.1, CELE_F17E9.2, EnsemblGenomes-Gn:WBGene00017539, EnsemblGenomes-Tr:F17E9.2, F17E9.2, GI:351060792, UniProtKB/TrEMBL:O61524, WormBase:WBGene00017539		5.03333	8.35995	1.96903	2.55624	0.0105809	0.0268935
RCEA035069	BX284604	puf-7	CCD61586.1, CELE_B0273.2, EnsemblGenomes-Gn:WBGene00004243, EnsemblGenomes-Tr:B0273.2.1, EnsemblGenomes-Tr:B0273.2.2, GI:351065602, puf-7, WormBase:WBGene00004243	Hypothetical protein	5.02671	1058.78	0.621068	8.09365	5.79009e-16	3.21116e-14
RCEA024493	BX284603	egg-1	CCD61503.1, CELE_B0244.8, egg-1, EnsemblGenomes-Gn:WBGene00015083, EnsemblGenomes-Tr:B0244.8, GI:351065536, GOA:Q09967, InterPro:IPR002172, InterPro:IPR023415, UniProtKB/TrEMBL:Q09967, WormBase:WBGene00015083		5.02634	4500.29	0.625493	8.03581	9.29629e-16	4.97286e-14
RCEA025462	BX284603	cpg-2	CCD61602.1, CELE_B0280.5, cpg-2, EnsemblGenomes-Gn:WBGene00015102, EnsemblGenomes-Tr:B0280.5, GI:351065621, WormBase:WBGene00015102		5.02622	34263.8	0.64052	7.8471	4.25753e-15	1.99456e-13
RCEA084762	BX284605	F36G9.7	CAB04338.2, CELE_F36G9.7, EnsemblGenomes-Gn:WBGene00009486, EnsemblGenomes-Tr:F36G9.7, F36G9.7, GI:194686224, GOA:O45477, UniProtKB/TrEMBL:O45477, WormBase:WBGene00009486		5.02532	11.2887	1.57542	3.18983	0.00142358	0.00477852
RCEA100990	BX284606	K09E3.6	CCD63628.1, CELE_K09E3.6, EnsemblGenomes-Gn:WBGene00019577, EnsemblGenomes-Tr:K09E3.6, GI:351021355, InterPro:IPR005020, K09E3.6, UniProtKB/TrEMBL:Q21396, WormBase:WBGene00019577		5.02097	8.92645	1.77404	2.83025	0.00465117	0.0133797
RCEA022088	BX284603	tbx-43	CCD73786.1, CELE_Y46E12A.4, EnsemblGenomes-Gn:WBGene00044798, EnsemblGenomes-Tr:Y46E12A.4, GI:351051160, GOA:Q1T6W8, InterPro:IPR001699, InterPro:IPR008967, tbx-43, UniProtKB/TrEMBL:Q1T6W8, WormBase:WBGene00044798		5.01926	10.3266	1.79316	2.79911	0.00512435	0.0145158
RCEA024922	BX284603	gadr-3	CCD83375.1, CELE_F47D12.5, EnsemblGenomes-Gn:WBGene00018561, EnsemblGenomes-Tr:F47D12.5, gadr-3, GI:373219058, WormBase:WBGene00018561		5.01793	11.2894	1.95608	2.5653	0.0103086	0.0263346
RCEA085179	BX284605	skr-11	CELE_F13A7.9, skr-11		5.01547	10.0117	1.81868	2.75775	0.00582013	0.0160947
RCEA019341	BX284602	tag-276	CAB55028.1, CELE_Y57A10A.9, EnsemblGenomes-Gn:WBGene00013254, EnsemblGenomes-Tr:Y57A10A.9, GI:5832940, tag-276, UniProtKB/TrEMBL:Q9NA77, WormBase:WBGene00013254		5.01536	7.48537	1.98002	2.53299	0.0113095	0.0284292
RCEA026255	BX284603	rfs-1	CCD62651.1, CELE_C30A5.2, EnsemblGenomes-Gn:WBGene00004342, EnsemblGenomes-Tr:C30A5.2, GI:351020664, rfs-1, WormBase:WBGene00004342		5.01452	12.4054	1.93106	2.59678	0.00941033	0.0243365
RCEA011276	BX284602	sdz-28	CCD67112.1, CELE_R52.1, EnsemblGenomes-Gn:WBGene00020073, EnsemblGenomes-Tr:R52.1, GI:373220648, GOA:O17297, InterPro:IPR000210, InterPro:IPR002083, InterPro:IPR008974, InterPro:IPR011333, sdz-28, UniProtKB/TrEMBL:O17297, WormBase:WBGene00020073		5.01376	13.7025	1.56089	3.21211	0.00131764	0.00446163
RCEA028792	BX284603	sdz-33	CAB60508.1, CELE_Y56A3A.14, EnsemblGenomes-Gn:WBGene00013233, EnsemblGenomes-Tr:Y56A3A.14, GI:6425395, InterPro:IPR012885, sdz-33, UniProtKB/TrEMBL:Q9U232, WormBase:WBGene00013233		5.01286	7.77558	2.04517	2.45107	0.0142432	0.0344049
RCEA022257	BX284603	cpt-3	CCD67073.1, CELE_Y48G9A.10, cpt-3, EnsemblGenomes-Gn:WBGene00021703, EnsemblGenomes-Tr:Y48G9A.10, GI:373219329, GOA:Q9N3N3, InterPro:IPR000542, UniProtKB/TrEMBL:Q9N3N3, WormBase:WBGene00021703		5.00822	133.309	0.917418	5.45904	4.78719e-08	5.24436e-07
RCEA100982	BX284606	sdz-2	CCD63616.1, CELE_C08A9.7, EnsemblGenomes-Gn:WBGene00015587, EnsemblGenomes-Tr:C08A9.7, GI:373218832, InterPro:IPR005020, sdz-2, UniProtKB/TrEMBL:Q17810, WormBase:WBGene00015587		5.00274	10.8569	2.16108	2.31493	0.020617	0.0469303
RCEA021944	BX284603	Y82E9BR.1	CCD73057.1, CELE_Y82E9BR.1, EnsemblGenomes-Gn:WBGene00022334, EnsemblGenomes-Tr:Y82E9BR.1, GI:373220367, InterPro:IPR015880, UniProtKB/TrEMBL:Q9BKR6, WormBase:WBGene00022334, Y82E9BR.1		4.99565	7.45739	2.11538	2.36159	0.018197	0.0422375
RCEA014594	BX284602	clec-88	CCD66395.1, CELE_K10B2.3, clec-88, EnsemblGenomes-Gn:WBGene00019606, EnsemblGenomes-Tr:K10B2.3b, GI:351058698, GOA:H2KZ57, InterPro:IPR001304, InterPro:IPR016186, InterPro:IPR016187, UniProtKB/TrEMBL:H2KZ57, WormBase:WBGene00019606		4.9916	1492.62	0.570925	8.74302	2.2697e-18	2.04167e-16
RCEA087821	BX284605	chk-2	CAB60407.2, CELE_Y60A3A.12, chk-2, GI:14530652, WormBase:WBGene00000499		4.99029	39.7501	1.19199	4.18652	2.83261e-05	0.000156291
RCEA011528	BX284602	bath-13	bath-13, CCD70869.1, CELE_F40B1.1, EnsemblGenomes-Gn:WBGene00018223, EnsemblGenomes-Tr:F40B1.1, GI:351062826, InterPro:IPR000210, InterPro:IPR002083, InterPro:IPR008974, InterPro:IPR011333, UniProtKB/TrEMBL:O76568, WormBase:WBGene00018223		4.98402	6.55984	2.0581	2.42167	0.0154495	0.0368584
RCEA097379	BX284606	dot-1.4	CAA90610.1, CELE_F55G7.2, dot-1.4, EnsemblGenomes-Gn:WBGene00010120, EnsemblGenomes-Tr:F55G7.2, GI:3877615, GOA:Q20856, InterPro:IPR013110, InterPro:IPR025789, InterPro:IPR029063, InterPro:IPR030445, UniProtKB/TrEMBL:Q20856, WormBase:WBGene00010120	Histone-lysine N-methyltransferase (EC 2.1.1.43)	4.98323	7.30069	1.94828	2.55776	0.010535	0.0267993
RCEA097679	BX284606	ceh-40	CAA92154.1, ceh-40, CELE_F17A2.5, EnsemblGenomes-Gn:WBGene00000461, EnsemblGenomes-Tr:F17A2.5, GI:3876016, WormBase:WBGene00000461		4.97965	23.2743	1.61629	3.0809	0.00206373	0.00661947
RCEA012295	BX284602	C16C8.20	C16C8.20, CCD64708.1, CELE_C16C8.20, EnsemblGenomes-Gn:WBGene00195070, EnsemblGenomes-Tr:C16C8.20, GI:351058089, InterPro:IPR000626, InterPro:IPR029071, UniProtKB/TrEMBL:G4S0D4, WormBase:WBGene00195070		4.97647	21.1782	1.4152	3.51643	0.000437387	0.00171912
RCEA016371	BX284602	dod-23	CAA91387.1, CELE_F49E12.2, dod-23, EnsemblGenomes-Gn:WBGene00009898, EnsemblGenomes-Tr:F49E12.2, GI:3877354, UniProtKB/TrEMBL:Q20615, WormBase:WBGene00009898		4.97047	1669.35	0.699859	7.1021	1.22878e-12	3.54425e-11
RCEA024084	BX284603	cah-1	cah-1, CCD67410.1, CELE_F54D8.4, EnsemblGenomes-Gn:WBGene00000279, EnsemblGenomes-Tr:F54D8.4, GI:351059829, WormBase:WBGene00000279		4.96822	17.812	1.62401	3.05923	0.00221904	0.00704721
RCEA031243	BX284604	nhr-277	CCD74201.1, CELE_Y94H6A.1, EnsemblGenomes-Gn:WBGene00022374, EnsemblGenomes-Tr:Y94H6A.1, GI:351051379, GOA:Q9N2W3, InterPro:IPR000536, InterPro:IPR001628, InterPro:IPR013088, InterPro:IPR016355, nhr-277, UniProtKB/TrEMBL:Q9N2W3, WormBase:WBGene00022374		4.96671	8.00477	1.75805	2.82512	0.00472626	0.0135414
RCEA076263	BX284605	Y57E12B.10	CCD72910.1, CELE_Y57E12B.10, EnsemblGenomes-Gn:WBGene00202501, EnsemblGenomes-Tr:Y57E12B.10, GI:373220275, UniProtKB/TrEMBL:E2S7J3, WormBase:WBGene00202501, Y57E12B.10		4.9667	8.6367	1.90219	2.61104	0.00902675	0.0234935
RCEA087706	BX284605	W04E12.2	CAB04914.1, CELE_W04E12.2, EnsemblGenomes-Gn:WBGene00012247, EnsemblGenomes-Tr:W04E12.2, GI:3880541, GOA:Q9XUL2, UniProtKB/TrEMBL:Q9XUL2, W04E12.2, WormBase:WBGene00012247		4.96206	10.2271	2.11131	2.35023	0.0187617	0.0433149
RCEA003992	BX284601	dpy-14	CCD72469.1, CELE_H27M09.4, dpy-14, EnsemblGenomes-Gn:WBGene00001075, EnsemblGenomes-Tr:H27M09.4, GI:351064179, GOA:G5EEB6, InterPro:IPR002486, UniProtKB/TrEMBL:G5EEB6, WormBase:WBGene00001075		4.96142	79.9222	1.15136	4.30919	1.63854e-05	9.68932e-05
RCEA012237	BX284602	bath-10	bath-10, CCD69499.1, CELE_Y49F6C.4, EnsemblGenomes-Gn:WBGene00021726, EnsemblGenomes-Tr:Y49F6C.4, GI:351061654, InterPro:IPR000210, InterPro:IPR002083, InterPro:IPR008974, InterPro:IPR011333, UniProtKB/TrEMBL:Q9TYJ1, WormBase:WBGene00021726		4.96087	9.25756	2.14687	2.31074	0.020847	0.047354
RCEA022318	BX284603	C39B5.2	C39B5.2, CCF23387.1, CELE_C39B5.2, EnsemblGenomes-Gn:WBGene00016520, EnsemblGenomes-Tr:C39B5.2b, GI:373254160, GOA:H1ZUW8, InterPro:IPR001810, UniProtKB/TrEMBL:H1ZUW8, WormBase:WBGene00016520		4.95981	20.7097	1.5217	3.2594	0.00111648	0.00386286
RCEA009021	BX284601	ins-30	CAB04963.1, CELE_ZC334.2, EnsemblGenomes-Gn:WBGene00002113, EnsemblGenomes-Tr:ZC334.2, GI:3881431, GOA:Q9XUI8, ins-30, InterPro:IPR003235, UniProtKB/TrEMBL:Q9XUI8, WormBase:WBGene00002113		4.95475	12.7799	2.02644	2.44505	0.0144831	0.0348935
RCEA002809	BX284601	C01G8.1	C01G8.1, CCD62458.1, CELE_C01G8.1, EnsemblGenomes-Gn:WBGene00015312, EnsemblGenomes-Tr:C01G8.1a, GI:351020474, UniProtKB/TrEMBL:P91011, WormBase:WBGene00015312		4.94625	1482.02	0.527781	9.37177	7.13231e-21	1.07591e-18
RCEA097034	BX284606	spp-9	CAA91486.2, CELE_T25C12.2, EnsemblGenomes-Gn:WBGene00004994, EnsemblGenomes-Tr:T25C12.2, GI:62954611, InterPro:IPR008138, InterPro:IPR008139, InterPro:IPR011001, spp-9, UniProtKB/TrEMBL:Q22776, WormBase:WBGene00004994		4.94587	68.1024	1.68152	2.94131	0.00326829	0.00982898
RCEA099032	BX284606	cyp-13B2	CAB04582.3, CELE_K06G5.2, cyp-13B2, EnsemblGenomes-Gn:WBGene00010606, EnsemblGenomes-Tr:K06G5.2, GI:54649872, GOA:Q9XUT8, InterPro:IPR001128, InterPro:IPR002401, InterPro:IPR017972, UniProtKB/TrEMBL:Q9XUT8, WormBase:WBGene00010606		4.94073	8.52773	1.76907	2.79284	0.00522481	0.0147404
RCEA042602	BX284604	T13F2.6	CAB03357.1, CELE_T13F2.6, EnsemblGenomes-Gn:WBGene00011746, EnsemblGenomes-Tr:T13F2.6, GI:3879833, T13F2.6, UniProtKB/TrEMBL:Q94049, WormBase:WBGene00011746		4.93778	545.535	0.527975	9.35229	8.57681e-21	1.24694e-18
RCEA038903	BX284604	dlc-5	CCD74188.1, CELE_Y73B6BL.43, dlc-5, EnsemblGenomes-Gn:WBGene00043067, EnsemblGenomes-Tr:Y73B6BL.43, GI:351059345, GOA:Q65XS9, InterPro:IPR001372, UniProtKB/TrEMBL:Q65XS9, WormBase:WBGene00043067		4.93723	19.3894	1.46191	3.37724	0.000732171	0.00268338
RCEA042087	BX284604	Y11D7A.7	CAA21583.2, CELE_Y11D7A.7, EnsemblGenomes-Gn:WBGene00012431, EnsemblGenomes-Tr:Y11D7A.7, GI:371571191, UniProtKB/TrEMBL:Q9XWR5, WormBase:WBGene00012431, Y11D7A.7		4.93699	243.078	0.67995	7.26082	3.84752e-13	1.22966e-11
RCEA000530	BX284601	R06A10.1	CCD73239.1, CELE_R06A10.1, EnsemblGenomes-Gn:WBGene00019909, EnsemblGenomes-Tr:R06A10.1, GI:351064755, GOA:O44746, InterPro:IPR020846, R06A10.1, UniProtKB/TrEMBL:O44746, WormBase:WBGene00019909	Hypothetical protein	4.93666	16.8717	1.45865	3.3844	0.000713349	0.00262396
RCEA029331	BX284603	Y39E4B.10	CAB54431.1, CELE_Y39E4B.10, EnsemblGenomes-Gn:WBGene00012719, EnsemblGenomes-Tr:Y39E4B.10, GI:5824781, UniProtKB/TrEMBL:Q9U2K2, WormBase:WBGene00012719, Y39E4B.10		4.93643	171.285	0.590894	8.35418	6.58913e-17	4.51469e-15
RCEA073543	BX284605	K08D9.9	CCQ25650.1, CELE_K08D9.9, EnsemblGenomes-Gn:WBGene00235094, EnsemblGenomes-Tr:K08D9.9, GI:442535401, K08D9.9, UniProtKB/TrEMBL:L8EC28, WormBase:WBGene00235094		4.92229	53.215	1.19736	4.11096	3.94012e-05	0.000208917
RCEA032571	BX284604	F28E10.5	CCD69731.2, CELE_F28E10.5, EnsemblGenomes-Gn:WBGene00044302, EnsemblGenomes-Tr:F28E10.5, F28E10.5, GI:548932261, GOA:A3FPI8, InterPro:IPR008758, InterPro:IPR029058, UniProtKB/TrEMBL:A3FPI8, WormBase:WBGene00044302		4.91519	12.3624	1.81731	2.70466	0.00683743	0.0184579
RCEA028677	BX284603	pqn-84	CAB63354.2, CELE_Y41C4A.5, EnsemblGenomes-Gn:WBGene00004165, EnsemblGenomes-Tr:Y41C4A.5, GI:28316221, GOA:Q9U2I7, InterPro:IPR001079, InterPro:IPR013320, pqn-84, UniProtKB/TrEMBL:Q9U2I7, WormBase:WBGene00004165		4.91353	15.3624	1.75662	2.79715	0.00515557	0.0145847
RCEA022337	BX284603	fbxa-43	CCD67066.1, CELE_T20H9.2, EnsemblGenomes-Gn:WBGene00020638, EnsemblGenomes-Tr:T20H9.2, fbxa-43, GI:373254167, InterPro:IPR001810, InterPro:IPR002900, UniProtKB/TrEMBL:O44888, WormBase:WBGene00020638		4.91274	9.02593	2.14487	2.29046	0.0219945	0.0496241
RCEA010426	BX284602	F45D11.5	CCD66364.1, CELE_F45D11.5, EnsemblGenomes-Gn:WBGene00018452, EnsemblGenomes-Tr:F45D11.5, F45D11.5, GI:351058668, InterPro:IPR000210, InterPro:IPR011333, UniProtKB/TrEMBL:Q8MYD5, WormBase:WBGene00018452		4.91246	6.82647	2.09158	2.34868	0.0188399	0.0434822
RCEA098464	BX284606	F02D10.6	CAA91937.1, CELE_F02D10.6, EnsemblGenomes-Gn:WBGene00008526, EnsemblGenomes-Tr:F02D10.6, F02D10.6, GI:3875543, GOA:Q19116, UniProtKB/TrEMBL:Q19116, WormBase:WBGene00008526		4.90538	16.973	1.53445	3.19684	0.00138942	0.00467594
RCEA083502	BX284605	F43D2.2	CELE_F43D2.2, F43D2.2		4.90528	74.0321	1.27552	3.84572	0.000120197	0.000556869
RCEA093423	BX284606	C53B7.3	C53B7.3, CCD67893.1, CELE_C53B7.3, EnsemblGenomes-Gn:WBGene00016894, EnsemblGenomes-Tr:C53B7.3b, GI:351060256, UniProtKB/TrEMBL:H2KZE4, WormBase:WBGene00016894		4.90488	617.098	0.577809	8.48876	2.08862e-17	1.52946e-15
RCEA100965	BX284606	irld-23	CCD63637.2, CELE_C30G4.6, EnsemblGenomes-Gn:WBGene00016271, EnsemblGenomes-Tr:C30G4.6, GI:373218846, InterPro:IPR000494, irld-23, UniProtKB/TrEMBL:Q18335, WormBase:WBGene00016271		4.9033	7.35944	2.12989	2.30214	0.0213273	0.0483283
RCEA027905	BX284603	T07A5.7	CAO78722.2, CELE_T07A5.7, EnsemblGenomes-Gn:WBGene00045475, EnsemblGenomes-Tr:T07A5.7, GI:242342420, T07A5.7, WormBase:WBGene00045475		4.90297	9.91461	1.732	2.8308	0.00464311	0.0133615
RCEA008333	BX284601	clec-104	CAA22313.1, CELE_Y18D10A.10, clec-104, EnsemblGenomes-Gn:WBGene00012480, EnsemblGenomes-Tr:Y18D10A.10, GI:3979934, GOA:Q9XW21, InterPro:IPR001304, InterPro:IPR016186, InterPro:IPR016187, UniProtKB/TrEMBL:Q9XW21, WormBase:WBGene00012480		4.90063	11.1009	1.91729	2.55602	0.0105876	0.0268975
RCEA004479	BX284601	chs-1	CAA96688.2, CELE_T25G3.2, chs-1, EnsemblGenomes-Gn:WBGene00000496, EnsemblGenomes-Tr:T25G3.2.1, EnsemblGenomes-Tr:T25G3.2.2, GI:77799168, GOA:G5ECD6, InterPro:IPR004835, InterPro:IPR029044, UniProtKB/TrEMBL:G5ECD6, WormBase:WBGene00000496	N-acetylglucosaminyltransferase (EC 2.4.1.-)	4.89806	846.064	0.762917	6.42018	1.36116e-10	2.63582e-09
RCEA087355	BX284605	fbxb-1	CAB04843.1, CELE_T26H2.1, EnsemblGenomes-Gn:WBGene00012063, EnsemblGenomes-Tr:T26H2.1, fbxb-1, GI:3880245, InterPro:IPR001810, InterPro:IPR012885, UniProtKB/TrEMBL:O18134, WormBase:WBGene00012063		4.89295	6.77008	1.9202	2.54814	0.0108299	0.027393
RCEA012301	BX284602	C16C8.13	C16C8.13, CCD64703.1, CELE_C16C8.13, EnsemblGenomes-Gn:WBGene00015851, EnsemblGenomes-Tr:C16C8.13, GI:351058084, InterPro:IPR000626, InterPro:IPR029071, UniProtKB/TrEMBL:P91052, WormBase:WBGene00015851		4.88938	10.0977	1.937	2.52419	0.0115964	0.0289669
RCEA020713	BX284602	clec-147	CAB03841.1, CELE_C04H5.2, clec-147, EnsemblGenomes-Gn:WBGene00007313, EnsemblGenomes-Tr:C04H5.2.1, EnsemblGenomes-Tr:C04H5.2.2, GI:3873941, GOA:O62025, InterPro:IPR001304, InterPro:IPR016186, InterPro:IPR016187, UniProtKB/TrEMBL:O62025, WormBase:WBGene00007313		4.88508	173.256	0.797582	6.12486	9.07624e-10	1.48177e-08
RCEA009982	BX284602	C24H12.2	C24H12.2, CCD62827.1, CELE_C24H12.2, EnsemblGenomes-Gn:WBGene00016072, EnsemblGenomes-Tr:C24H12.2, GI:351020851, InterPro:IPR024861, UniProtKB/TrEMBL:O17164, WormBase:WBGene00016072		4.88347	6.42467	1.93319	2.52612	0.0115329	0.0288562
RCEA011213	BX284602	btb-3	btb-3, CELE_B0047.2, EnsemblGenomes-Gn:WBGene00015013, EnsemblGenomes-Tr:B0047.2		4.88312	7.18183	1.92883	2.53165	0.0113527	0.0284952
RCEA076051	BX284605	mtl-1	CCD72928.1, CELE_K11G9.6, EnsemblGenomes-Gn:WBGene00003473, EnsemblGenomes-Tr:K11G9.6, GI:373220292, mtl-1, WormBase:WBGene00003473		4.8824	26.9533	1.1786	4.14255	3.43472e-05	0.000184932
RCEA076862	BX284605	C50E3.13	C50E3.13, CCD67750.1, CELE_C50E3.13, EnsemblGenomes-Gn:WBGene00016824, EnsemblGenomes-Tr:C50E3.13, GI:351060132, UniProtKB/TrEMBL:Q22936, WormBase:WBGene00016824		4.87217	52.1516	1.15402	4.2219	2.42248e-05	0.000136049
RCEA087039	BX284605	ZK384.4	CELE_ZK384.4, ZK384.4		4.8706	15.8683	1.64623	2.95863	0.00309007	0.00935455
RCEA010863	BX284602	fbxa-164	CCD63671.1, CELE_C08E3.7, EnsemblGenomes-Gn:WBGene00015599, EnsemblGenomes-Tr:C08E3.7, fbxa-164, GI:351021380, GOA:O17198, InterPro:IPR001810, InterPro:IPR002900, UniProtKB/TrEMBL:O17198, WormBase:WBGene00015599		4.86238	8.05392	1.94908	2.49471	0.0126061	0.0310406
RCEA087772	BX284605	Y116F11B.17	CAY39360.1, CELE_Y116F11B.17, EnsemblGenomes-Gn:WBGene00189943, EnsemblGenomes-Tr:Y116F11B.17, GI:227905032, UniProtKB/TrEMBL:C3JXF1, WormBase:WBGene00189943, Y116F11B.17		4.84329	26.2231	1.40707	3.44211	0.000577189	0.00218437
RCEA012036	BX284602	Y27F2A.8	CCD73687.1, CELE_Y27F2A.8, EnsemblGenomes-Gn:WBGene00021299, EnsemblGenomes-Tr:Y27F2A.8, GI:351059286, UniProtKB/TrEMBL:Q86MI6, WormBase:WBGene00021299, Y27F2A.8		4.84178	19.4196	1.72263	2.8107	0.00494346	0.0140808
RCEA035042	BX284604	rme-2	CCD61594.1, CELE_T11F8.3, GI:351065612, GOA:O44191, InterPro:IPR000033, InterPro:IPR000152, InterPro:IPR000742, InterPro:IPR001881, InterPro:IPR002172, InterPro:IPR011042, InterPro:IPR013032, InterPro:IPR018097, InterPro:IPR023415, rme-2, UniProtKB/TrEMBL:O44191, WormBase:WBGene00004374		4.83188	6957.59	0.61325	7.87913	3.29658e-15	1.56873e-13
RCEA012664	BX284602	fbxb-103	CCD67671.1, CELE_F53C3.2, EnsemblGenomes-Gn:WBGene00018746, EnsemblGenomes-Tr:F53C3.2, fbxb-103, GI:351060048, InterPro:IPR001810, InterPro:IPR012885, UniProtKB/TrEMBL:Q9TXT8, WormBase:WBGene00018746		4.82949	6.93908	1.93561	2.49508	0.012593	0.0310148
RCEA051507	BX284604	F55B11.2	CAB05901.2, CELE_F55B11.2, EnsemblGenomes-Gn:WBGene00010084, EnsemblGenomes-Tr:F55B11.2.1, EnsemblGenomes-Tr:F55B11.2.2, F55B11.2, GI:26985855, UniProtKB/TrEMBL:O17891, WormBase:WBGene00010084		4.82843	3630.91	0.676122	7.14137	9.2408e-13	2.77684e-11
RCEA097417	BX284606	C49F5.6	C49F5.6, CAB03979.1, CELE_C49F5.6, EnsemblGenomes-Gn:WBGene00008210, EnsemblGenomes-Tr:C49F5.6, GI:3875068, UniProtKB/TrEMBL:O17684, WormBase:WBGene00008210		4.82775	256.171	0.672851	7.17507	7.22717e-13	2.1936e-11
RCEA044797	BX284604	K08E4.2	CAA92680.1, CELE_K08E4.2, GI:3878368, GOA:Q21333, InterPro:IPR014830, K08E4.2, UniProtKB/TrEMBL:Q21333, WormBase:WBGene00010666		4.8239	156.709	0.746495	6.46206	1.03284e-10	2.05275e-09
RCEA087508	BX284605	C25F9.16	C25F9.16, CBH29654.1, CELE_C25F9.16, EnsemblGenomes-Gn:WBGene00194803, EnsemblGenomes-Tr:C25F9.16, GI:262225629, UniProtKB/TrEMBL:D0VWP3, WormBase:WBGene00194803		4.82236	20.5796	1.6428	2.93544	0.00333074	0.00999633
RCEA074804	BX284605	F14F9.3	CCD62731.1, CELE_F14F9.3, EnsemblGenomes-Gn:WBGene00017466, EnsemblGenomes-Tr:F14F9.3, F14F9.3, GI:351020758, InterPro:IPR002867, UniProtKB/TrEMBL:Q9GUC7, WormBase:WBGene00017466		4.82057	115.875	1.25273	3.84805	0.000119059	0.000552109
RCEA086560	BX284605	Y37H2A.10	CAB60577.2, CELE_Y37H2A.10, GI:194680440, GOA:Q9U2N3, InterPro:IPR002601, UniProtKB/TrEMBL:Q9U2N3, WormBase:WBGene00012570, Y37H2A.10		4.81651	7.79706	1.80621	2.66665	0.00766124	0.0203289
RCEA100967	BX284606	C08A9.10	C08A9.10, CCD63618.1, CELE_C08A9.10, EnsemblGenomes-Gn:WBGene00044773, EnsemblGenomes-Tr:C08A9.10, GI:373218834, InterPro:IPR008451, UniProtKB/TrEMBL:Q27GT6, WormBase:WBGene00044773		4.81177	559.74	0.881114	5.46101	4.73441e-08	5.19786e-07
RCEA001815	BX284601	Y47G6A.31	CCD72575.1, CELE_Y47G6A.31, EnsemblGenomes-Gn:WBGene00044436, EnsemblGenomes-Tr:Y47G6A.31, GI:373220175, GOA:Q4W5S1, InterPro:IPR001841, InterPro:IPR013083, InterPro:IPR017907, UniProtKB/TrEMBL:Q4W5S1, WormBase:WBGene00044436, Y47G6A.31		4.81117	7.16363	1.92458	2.49986	0.0124242	0.0306491
RCEA006295	BX284601	hpo-24	CAB03400.2, CELE_T23D8.7, EnsemblGenomes-Gn:WBGene00011945, EnsemblGenomes-Tr:T23D8.7, GI:189310693, GOA:Q9XVI3, hpo-24, InterPro:IPR003100, InterPro:IPR003165, InterPro:IPR012337, InterPro:IPR014811, InterPro:IPR032472, InterPro:IPR032473, InterPro:IPR032474, UniProtKB/TrEMBL:Q9XVI3, WormBase:WBGene00011945	Protein Translation Initiation Factor 2C (IF-2C)	4.81044	569.92	0.547579	8.78493	1.56459e-18	1.4844e-16
RCEA026956	BX284603	glp-1	CAA79620.1, CELE_F02A9.6, EnsemblGenomes-Gn:WBGene00001609, EnsemblGenomes-Tr:F02A9.6, GI:3875450, glp-1, WormBase:WBGene00001609		4.80238	836.636	0.456003	10.5315	6.18701e-26	2.3931e-23
RCEA018259	BX284602	egg-3	CAA85453.1, CELE_F44F4.2, egg-3, EnsemblGenomes-Gn:WBGene00009701, EnsemblGenomes-Tr:F44F4.2.1, EnsemblGenomes-Tr:F44F4.2.2, GI:3877057, GOA:Q20402, InterPro:IPR000242, InterPro:IPR029021, UniProtKB/TrEMBL:Q20402, WormBase:WBGene00009701		4.79913	1175.45	0.636498	7.5399	4.70321e-14	1.85243e-12
RCEA092348	BX284606	T22B7.7	CCD74414.1, CELE_T22B7.7, EnsemblGenomes-Gn:WBGene00020674, EnsemblGenomes-Tr:T22B7.7, GI:351059393, InterPro:IPR029069, T22B7.7, UniProtKB/TrEMBL:Q23044, WormBase:WBGene00020674		4.79637	394.761	0.754491	6.35709	2.05605e-10	3.83382e-09
RCEA074991	BX284605	snpc-1.3	CCD65600.1, CELE_F08F3.9, EnsemblGenomes-Gn:WBGene00017265, EnsemblGenomes-Tr:F08F3.9b, GI:373254030, InterPro:IPR019188, snpc-1.3, UniProtKB/TrEMBL:Q7JNN6, WormBase:WBGene00017265		4.79609	253.501	0.795407	6.02973	1.64231e-09	2.49488e-08
RCEA090371	BX284606	twk-16	CCD66479.1, CELE_F52E4.4, EnsemblGenomes-Gn:WBGene00006670, EnsemblGenomes-Tr:F52E4.4, GI:373219215, GOA:G5ED42, InterPro:IPR003092, InterPro:IPR003280, InterPro:IPR013099, twk-16, UniProtKB/TrEMBL:G5ED42, WormBase:WBGene00006670		4.7945	4.6424	2.01919	2.37447	0.0175743	0.0410383
RCEA004282	BX284601	cpg-3	CAA95840.1, CELE_R06C7.4, cpg-3, EnsemblGenomes-Gn:WBGene00011063, EnsemblGenomes-Tr:R06C7.4.1, EnsemblGenomes-Tr:R06C7.4.2, EnsemblGenomes-Tr:R06C7.4.3, GI:3878835, WormBase:WBGene00011063		4.79305	3767.03	0.563205	8.51031	1.73463e-17	1.30835e-15
RCEA022255	BX284603	Y39A3A.4	CCD73007.1, CELE_Y39A3A.4, EnsemblGenomes-Gn:WBGene00021435, EnsemblGenomes-Tr:Y39A3A.4, GI:351064561, GOA:Q9N520, InterPro:IPR000242, InterPro:IPR029021, UniProtKB/TrEMBL:Q9N520, WormBase:WBGene00021435, Y39A3A.4		4.78368	13.4537	1.77177	2.69995	0.00693499	0.0186778
RCEA088587	BX284606	Y73B3B.5	CELE_Y73B3B.5, Y73B3B.5		4.78169	9.5612	1.90319	2.51246	0.0119892	0.0297805
RCEA029895	BX284604	col-101	CCD69690.1, CELE_K02D7.3, col-101, GI:351061836, GOA:O45105, InterPro:IPR002486, InterPro:IPR008160, UniProtKB/TrEMBL:O45105, WormBase:WBGene00000675		4.77227	3328.69	0.751405	6.35113	2.13745e-10	3.9523e-09
RCEA008972	BX284601	Y71A12B.14	CELE_Y71A12B.14, Y71A12B.14		4.7668	10.7382	1.95636	2.43656	0.0148276	0.0356054
RCEA005028	BX284601	F10D11.2	CAB02914.2, CELE_F10D11.2, EnsemblGenomes-Gn:WBGene00008648, EnsemblGenomes-Tr:F10D11.2, F10D11.2, GI:25004925, UniProtKB/TrEMBL:O17777, WormBase:WBGene00008648		4.7615	203.341	0.78508	6.06498	1.31966e-09	2.05652e-08
RCEA093103	BX284606	K10C2.7	CCD72628.1, CELE_K10C2.7, EnsemblGenomes-Gn:WBGene00019622, EnsemblGenomes-Tr:K10C2.7, GI:351064288, K10C2.7, UniProtKB/TrEMBL:Q967F0, WormBase:WBGene00019622		4.75754	6.30893	2.01098	2.36578	0.0179922	0.0418008
RCEA099192	BX284606	M163.8	CAH04750.1, CELE_M163.8, EnsemblGenomes-Gn:WBGene00010940, EnsemblGenomes-Tr:M163.8.1, EnsemblGenomes-Tr:M163.8.2, GI:50507721, InterPro:IPR003582, M163.8, UniProtKB/TrEMBL:Q6BES2, WormBase:WBGene00010940		4.75705	5.39253	1.98048	2.40197	0.0163071	0.0384785
RCEA070356	BX284604	skr-13	CAM36326.1, CELE_C52D10.8, EnsemblGenomes-Gn:WBGene00004819, EnsemblGenomes-Tr:C52D10.8, GI:126468449, GOA:G5EEX4, InterPro:IPR001232, InterPro:IPR011333, InterPro:IPR016072, InterPro:IPR016073, InterPro:IPR016897, skr-13, UniProtKB/TrEMBL:G5EEX4, WormBase:WBGene00004819		4.75221	66.8782	1.04131	4.5637	5.0261e-06	3.39994e-05
RCEA022583	BX284603	twk-45	CCD73876.2, CELE_Y71H2AM.22, GI:919007382, GOA:Q9BL31, InterPro:IPR003280, InterPro:IPR013099, twk-45, UniProtKB/TrEMBL:Q9BL31, WormBase:WBGene00006695		4.75165	7.22141	1.81415	2.61922	0.00881309	0.022989
RCEA077468	BX284605	pos-1	CCD70802.1, CELE_F52E1.1, EnsemblGenomes-Gn:WBGene00004078, EnsemblGenomes-Tr:F52E1.1, GI:373254396, GOA:G5EF15, InterPro:IPR000571, pos-1, UniProtKB/TrEMBL:G5EF15, WormBase:WBGene00004078		4.74929	4267.16	0.581153	8.17218	3.02872e-16	1.77086e-14
RCEA027745	BX284603	T16G12.8	CAB54306.1, CELE_T16G12.8, EnsemblGenomes-Gn:WBGene00011809, EnsemblGenomes-Tr:T16G12.8, GI:5824621, GOA:Q9U366, T16G12.8, UniProtKB/TrEMBL:Q9U366, WormBase:WBGene00011809		4.74756	61.798	1.00829	4.70854	2.49495e-06	1.81467e-05
RCEA042219	BX284604	col-121	CAA93499.1, CELE_F56D5.1, col-121, EnsemblGenomes-Gn:WBGene00000695, EnsemblGenomes-Tr:F56D5.1, GI:3877701, GOA:Q20880, InterPro:IPR002486, InterPro:IPR008160, UniProtKB/TrEMBL:Q20880, WormBase:WBGene00000695		4.7454	12.1225	1.85383	2.55978	0.0104738	0.0266705
RCEA024294	BX284603	R02F2.4	CCD68398.1, CELE_R02F2.4, EnsemblGenomes-Gn:WBGene00019833, EnsemblGenomes-Tr:R02F2.4, GI:351060682, GOA:Q21650, InterPro:IPR002557, R02F2.4, UniProtKB/TrEMBL:Q21650, WormBase:WBGene00019833		4.74405	379.855	0.645909	7.34476	2.06122e-13	6.9873e-12
RCEA001633	BX284601	fog-1	CCD72822.1, CELE_Y54E10A.4, fog-1, GI:373220248, GOA:G5EBS6, InterPro:IPR000504, InterPro:IPR012677, UniProtKB/TrEMBL:G5EBS6, WormBase:WBGene00001481		4.74158	752.77	0.505591	9.37828	6.70603e-21	1.02182e-18
RCEA049249	BX284604	ins-34	CAB05196.2, CELE_F52B11.6, EnsemblGenomes-Gn:WBGene00002117, EnsemblGenomes-Tr:F52B11.6, GI:87251897, ins-34, UniProtKB/TrEMBL:Q9XUE8, WormBase:WBGene00002117		4.73875	14.2711	1.86104	2.54629	0.0108873	0.0275055
RCEA022059	BX284603	Y22D7AR.10	CCD73765.1, CELE_Y22D7AR.10, EnsemblGenomes-Gn:WBGene00021263, EnsemblGenomes-Tr:Y22D7AR.10, GI:351051149, UniProtKB/TrEMBL:Q9BKX4, WormBase:WBGene00021263, Y22D7AR.10		4.73442	250.948	0.841146	5.62854	1.81743e-08	2.22532e-07
RCEA016373	BX284602	skpo-1	CAA91388.1, CELE_F49E12.1, EnsemblGenomes-Gn:WBGene00009897, EnsemblGenomes-Tr:F49E12.1, GI:3877355, skpo-1, WormBase:WBGene00009897		4.72587	1089.31	0.657071	7.19233	6.36938e-13	1.95139e-11
RCEA004545	BX284601	del-3	CAB01704.1, CELE_F26A3.6, del-3, EnsemblGenomes-Gn:WBGene00009144, EnsemblGenomes-Tr:F26A3.6, GI:3876386, GOA:Q93597, InterPro:IPR001873, UniProtKB/TrEMBL:Q93597, WormBase:WBGene00009144		4.72568	11.5163	1.80045	2.62471	0.00867218	0.0226646
RCEA031742	BX284604	B0212.3	B0212.3, CCD61331.1, CELE_B0212.3, EnsemblGenomes-Gn:WBGene00015037, EnsemblGenomes-Tr:B0212.3, GI:351065357, InterPro:IPR006570, UniProtKB/TrEMBL:O45063, WormBase:WBGene00015037		4.71942	68.2989	0.929762	5.07594	3.8559e-07	3.4276e-06
RCEA012289	BX284602	C16C8.4	C16C8.4, CCD64695.1, CELE_C16C8.4, EnsemblGenomes-Gn:WBGene00015842, EnsemblGenomes-Tr:C16C8.4, GI:351058076, InterPro:IPR000626, InterPro:IPR019956, InterPro:IPR029071, UniProtKB/TrEMBL:P91057, WormBase:WBGene00015842		4.71884	204.024	0.609508	7.74204	9.78345e-15	4.37933e-13
RCEA031552	BX284604	gcy-23	CCD74008.1, CELE_T26C12.4, EnsemblGenomes-Gn:WBGene00001548, EnsemblGenomes-Tr:T26C12.4, gcy-23, GI:351050934, WormBase:WBGene00001548		4.71778	18.0197	1.73974	2.71177	0.00669249	0.0181478
RCEA020486	BX284602	eat-2	CAB54450.1, CELE_Y48B6A.4, eat-2, EnsemblGenomes-Gn:WBGene00001133, EnsemblGenomes-Tr:Y48B6A.4, GI:5824807, WormBase:WBGene00001133		4.71441	7.97978	1.82035	2.58984	0.00960198	0.0247515
RCEA013124	BX284602	C27D9.1	C27D9.1, CCD65844.1, CELE_C27D9.1, EnsemblGenomes-Gn:WBGene00016163, EnsemblGenomes-Tr:C27D9.1, GI:351058401, GOA:Q18255, InterPro:IPR001503, InterPro:IPR009497, UniProtKB/TrEMBL:Q18255, WormBase:WBGene00016163		4.70859	346.895	0.806411	5.83894	5.25344e-09	7.20438e-08
RCEA005646	BX284601	prom-1	CAB04206.2, CELE_F26H9.1, EnsemblGenomes-Gn:WBGene00009173, EnsemblGenomes-Tr:F26H9.1, GI:159572263, prom-1, UniProtKB/TrEMBL:G5EDC7, WormBase:WBGene00009173		4.70529	128.678	0.662514	7.10217	1.22814e-12	3.54425e-11
RCEA008115	BX284601	W02D9.7	CAB03464.1, CELE_W02D9.7, EnsemblGenomes-Gn:WBGene00012213, EnsemblGenomes-Tr:W02D9.7, GI:3880407, UniProtKB/TrEMBL:Q9XVG9, W02D9.7, WormBase:WBGene00012213		4.69152	581.592	0.903573	5.19219	2.0784e-07	1.98802e-06
RCEA056677	BX284604	col-135	CAD89749.1, CELE_M199.5, col-135, EnsemblGenomes-Gn:WBGene00000708, EnsemblGenomes-Tr:M199.5a, GI:30145696, GOA:Q86D04, InterPro:IPR008160, UniProtKB/TrEMBL:Q86D04, WormBase:WBGene00000708		4.69061	26.7609	1.57436	2.97938	0.00288831	0.00883955
RCEA030396	BX284604	perm-4	CCD67230.2, CELE_C44B12.5, EnsemblGenomes-Gn:WBGene00016638, EnsemblGenomes-Tr:C44B12.5, GI:548932114, perm-4, UniProtKB/TrEMBL:O44144, WormBase:WBGene00016638		4.68484	12137.7	0.596173	7.85818	3.89751e-15	1.83731e-13
RCEA017318	BX284602	mex-6	CAA88088.2, CELE_AH6.5, EnsemblGenomes-Gn:WBGene00003231, EnsemblGenomes-Tr:AH6.5, GI:13548299, mex-6, WormBase:WBGene00003231		4.68064	1392.76	0.536692	8.72128	2.75075e-18	2.42662e-16
RCEA084834	BX284605	T10C6.10	CAB07666.1, CELE_T10C6.10, EnsemblGenomes-Gn:WBGene00011691, EnsemblGenomes-Tr:T10C6.10a, GI:3879745, GOA:O45772, InterPro:IPR001810, T10C6.10, UniProtKB/TrEMBL:O45772, WormBase:WBGene00011691		4.68052	50.5924	1.32879	3.52239	0.000427678	0.00168491
RCEA040769	BX284604	C50F7.5	C50F7.5, CCD67453.2, CELE_C50F7.5, EnsemblGenomes-Gn:WBGene00016845, EnsemblGenomes-Tr:C50F7.5, GI:412981949, UniProtKB/TrEMBL:Q18751, WormBase:WBGene00016845		4.67932	955.782	0.583661	8.01718	1.08202e-15	5.68722e-14
RCEA000200	BX284601	cutl-13	CCD73389.1, CELE_W04C9.3, cutl-13, EnsemblGenomes-Gn:WBGene00021025, EnsemblGenomes-Tr:W04C9.3, GI:351051100, GOA:Q9TZE2, InterPro:IPR001507, UniProtKB/TrEMBL:Q9TZE2, WormBase:WBGene00021025	Cuticlin 1 precursor	4.67613	5.19131	1.97068	2.37285	0.0176514	0.0411739
RCEA007860	BX284601	sdz-14	CAB04105.1, CELE_F14B6.1, EnsemblGenomes-Gn:WBGene00008782, EnsemblGenomes-Tr:F14B6.1, GI:3875879, sdz-14, UniProtKB/TrEMBL:O62161, WormBase:WBGene00008782		4.66902	13.0884	1.54173	3.02843	0.00245832	0.0077049
RCEA082978	BX284605	D1086.11	CAZ39161.1, CELE_D1086.11, D1086.11, EnsemblGenomes-Gn:WBGene00044081, EnsemblGenomes-Tr:D1086.11b, GI:242334865, UniProtKB/TrEMBL:C6KRN4, WormBase:WBGene00044081		4.6684	5036.33	0.687282	6.79255	1.10166e-11	2.68473e-10
RCEA065894	BX284604	K03D3.2	CAB05239.1, CELE_K03D3.2, EnsemblGenomes-Gn:WBGene00010528, EnsemblGenomes-Tr:K03D3.2, GI:3878209, K03D3.2, UniProtKB/TrEMBL:O45640, WormBase:WBGene00010528		4.66818	10.7307	1.7182	2.7169	0.00658963	0.0179107
RCEA072667	BX284605	C45H4.14	C45H4.14, CCD67423.1, CELE_C45H4.14, GI:351059842, UniProtKB/TrEMBL:H2KZB9, WormBase:WBGene00016695		4.66618	10.1743	1.84736	2.52586	0.0115417	0.0288638
RCEA017806	BX284602	R05H5.7	CAA88730.1, CELE_R05H5.7, EnsemblGenomes-Gn:WBGene00011041, EnsemblGenomes-Tr:R05H5.7, GI:3878803, R05H5.7, UniProtKB/TrEMBL:Q21766, WormBase:WBGene00011041		4.66136	6.97508	1.98176	2.35213	0.018666	0.0431403
RCEA008983	BX284601	gadr-5	CCE71291.2, CELE_Y71A12B.17, EnsemblGenomes-Gn:WBGene00045058, EnsemblGenomes-Tr:Y71A12B.17b, gadr-5, GI:412977277, GOA:G3DRG2, UniProtKB/TrEMBL:G3DRG2, WormBase:WBGene00045058		4.65868	6.30892	2.00795	2.32011	0.0203348	0.0463649
RCEA012085	BX284602	ZC239.1	CELE_ZC239.1, ZC239.1		4.65806	23.3424	1.60347	2.90499	0.00367265	0.0108781
RCEA093895	BX284606	C10A4.1	C10A4.1, CCD62403.1, CELE_C10A4.1, EnsemblGenomes-Gn:WBGene00015662, EnsemblGenomes-Tr:C10A4.1, GI:351020409, GOA:Q17894, InterPro:IPR008906, InterPro:IPR012337, UniProtKB/TrEMBL:Q17894, WormBase:WBGene00015662		4.65491	6.65472	1.83583	2.53559	0.011226	0.0282427
RCEA074730	BX284605	K11D12.13	CCD64407.1, CELE_K11D12.13, EnsemblGenomes-Gn:WBGene00044535, EnsemblGenomes-Tr:K11D12.13, GI:351057806, GOA:Q4R127, InterPro:IPR002223, InterPro:IPR020901, K11D12.13, UniProtKB/TrEMBL:Q4R127, WormBase:WBGene00044535		4.64712	313.529	0.851663	5.45653	4.85538e-08	5.31134e-07
RCEA006434	BX284601	clec-87	CAB02756.1, CELE_C25A1.8, clec-87, EnsemblGenomes-Gn:WBGene00007709, EnsemblGenomes-Tr:C25A1.8, GI:3874431, WormBase:WBGene00007709		4.64426	7538.46	0.606757	7.65423	1.94481e-14	8.19483e-13
RCEA019231	BX284602	Y17G7B.23	CBX25202.1, CELE_Y17G7B.23, EnsemblGenomes-Gn:WBGene00044030, EnsemblGenomes-Tr:Y17G7B.23a, GI:308071702, UniProtKB/TrEMBL:E1NZ05, WormBase:WBGene00044030, Y17G7B.23		4.64362	8.13897	1.88285	2.46628	0.0136526	0.0331642
RCEA032270	BX284604	F36A4.5	CCD69530.1, CELE_F36A4.5, EnsemblGenomes-Gn:WBGene00018084, EnsemblGenomes-Tr:F36A4.5a, F36A4.5, GI:351061689, InterPro:IPR008588, UniProtKB/TrEMBL:Q20092, WormBase:WBGene00018084		4.63892	13.5663	1.66256	2.79023	0.00526714	0.0148347
RCEA026544	BX284603	ZC21.10	CCD62577.1, CELE_ZC21.10, EnsemblGenomes-Gn:WBGene00044443, EnsemblGenomes-Tr:ZC21.10.1, EnsemblGenomes-Tr:ZC21.10.2, GI:373218699, UniProtKB/TrEMBL:Q3S1N7, WormBase:WBGene00044443, ZC21.10		4.6183	7.9914	1.83422	2.51785	0.0118072	0.0294011
RCEA099052	BX284606	K04C1.5	CAA94212.1, CELE_K04C1.5, EnsemblGenomes-Gn:WBGene00010555, EnsemblGenomes-Tr:K04C1.5, GI:3878249, GOA:Q21204, InterPro:IPR000719, InterPro:IPR008271, InterPro:IPR011009, K04C1.5, UniProtKB/TrEMBL:Q21204, WormBase:WBGene00010555		4.61537	72.0539	1.03877	4.44312	8.86635e-06	5.61263e-05
RCEA036513	BX284604	C31H1.8	C31H1.8, CCD64154.1, CELE_C31H1.8, EnsemblGenomes-Gn:WBGene00016291, EnsemblGenomes-Tr:C31H1.8a, GI:351050067, UniProtKB/TrEMBL:Q18343, WormBase:WBGene00016291		4.61143	695.669	0.653534	7.05615	1.71183e-12	4.78202e-11
RCEA098334	BX284606	R04D3.4	CAA94161.1, CELE_R04D3.4, EnsemblGenomes-Gn:WBGene00011012, EnsemblGenomes-Tr:R04D3.4, GI:3878813, R04D3.4, UniProtKB/TrEMBL:Q21711, WormBase:WBGene00011012		4.60901	236.5	0.912013	5.05367	4.33401e-07	3.78787e-06
RCEA042102	BX284604	flh-1	CAA21587.2, CELE_Y11D7A.12, EnsemblGenomes-Gn:WBGene00012435, EnsemblGenomes-Tr:Y11D7A.12a, flh-1, GI:37619868, GOA:Q9XWR1, InterPro:IPR007588, UniProtKB/TrEMBL:Q9XWR1, WormBase:WBGene00012435		4.59171	338.442	0.619354	7.41371	1.22815e-13	4.40062e-12
RCEA041243	BX284604	K07H8.11	CCD70609.1, CELE_K07H8.11, EnsemblGenomes-Gn:WBGene00044510, EnsemblGenomes-Tr:K07H8.11, GI:373254382, K07H8.11, UniProtKB/TrEMBL:Q4R123, WormBase:WBGene00044510		4.58409	13.2196	1.89837	2.41476	0.0157457	0.0373995
RCEA076061	BX284605	era-1	CCD72932.1, CELE_W02F12.3, EnsemblGenomes-Gn:WBGene00020948, EnsemblGenomes-Tr:W02F12.3, era-1, GI:373220296, UniProtKB/TrEMBL:O45146, WormBase:WBGene00020948		4.58259	1172.07	0.645245	7.10209	1.2288e-12	3.54425e-11
RCEA099585	BX284606	rgs-10	CAB05727.1, CELE_F45B8.2, EnsemblGenomes-Gn:WBGene00004353, EnsemblGenomes-Tr:F45B8.2, GI:3877145, rgs-10, WormBase:WBGene00004353	Hypothetical protein	4.58036	50.218	1.03192	4.43867	9.05163e-06	5.71791e-05
RCEA041744	BX284604	oma-1	CAA90977.1, CELE_C09G9.6, EnsemblGenomes-Gn:WBGene00003864, EnsemblGenomes-Tr:C09G9.6, GI:3874120, GOA:G5EC86, InterPro:IPR000571, oma-1, UniProtKB/TrEMBL:G5EC86, WormBase:WBGene00003864		4.57718	862.335	0.561936	8.14538	3.78089e-16	2.1769e-14
RCEA027098	BX284603	cpb-1	CAA79552.3, CELE_C40H1.1, cpb-1, EnsemblGenomes-Gn:WBGene00000770, EnsemblGenomes-Tr:C40H1.1, GI:224492398, WormBase:WBGene00000770		4.57314	327.513	0.591509	7.7313	1.06451e-14	4.70911e-13
RCEA074132	BX284605	C49G7.12	C49G7.12, CCD67693.1, CELE_C49G7.12, EnsemblGenomes-Gn:WBGene00077593, EnsemblGenomes-Tr:C49G7.12, GI:351060070, UniProtKB/TrEMBL:B1GRK3, WormBase:WBGene00077593		4.57175	177.363	0.881037	5.18906	2.11364e-07	2.01137e-06
RCEA084826	BX284605	hpo-42	CELE_T10C6.8, hpo-42		4.5705	167.745	0.879746	5.19526	2.04438e-07	1.9618e-06
RCEA026828	BX284603	cdc-25.3	CAA77456.1, cdc-25.3, CELE_ZK637.11, EnsemblGenomes-Gn:WBGene00000388, EnsemblGenomes-Tr:ZK637.11, GI:3881671, WormBase:WBGene00000388	M-phase inducer phosphatase 3 (EC 3.1.3.48)	4.57008	182.707	0.950669	4.80722	1.53043e-06	1.17191e-05
RCEA020701	BX284602	F57C2.4	CAB05526.1, CELE_F57C2.4, EnsemblGenomes-Gn:WBGene00010196, EnsemblGenomes-Tr:F57C2.4, F57C2.4, GI:3877787, UniProtKB/TrEMBL:O45596, WormBase:WBGene00010196		4.5697	254.165	0.89579	5.10131	3.37309e-07	3.04872e-06
RCEA015337	BX284602	gld-3	CCD65918.1, CELE_T07F8.3, EnsemblGenomes-Gn:WBGene00001597, EnsemblGenomes-Tr:T07F8.3a, GI:351058462, gld-3, WormBase:WBGene00001597		4.56957	1156.3	0.536795	8.51269	1.69938e-17	1.2882e-15
RCEA001824	BX284601	inx-21	CCD72546.1, CELE_Y47G6A.1, EnsemblGenomes-Gn:WBGene00002143, EnsemblGenomes-Tr:Y47G6A.1.1, EnsemblGenomes-Tr:Y47G6A.1.2, GI:373220146, GOA:Q9N3R4, InterPro:IPR000990, inx-21, UniProtKB/TrEMBL:Q9N3R4, WormBase:WBGene00002143		4.56265	198.001	0.576652	7.91232	2.52645e-15	1.2294e-13
RCEA091189	BX284606	F09F9.3	CCD69099.1, CELE_F09F9.3, EnsemblGenomes-Gn:WBGene00017308, EnsemblGenomes-Tr:F09F9.3, F09F9.3, GI:373219617, GOA:Q19283, UniProtKB/TrEMBL:Q19283, WormBase:WBGene00017308		4.55841	11.659	1.77778	2.5641	0.0103444	0.0264171
RCEA006270	BX284601	T24D1.3	CAB03425.1, CELE_T24D1.3, EnsemblGenomes-Gn:WBGene00011986, EnsemblGenomes-Tr:T24D1.3, GI:3880157, GOA:O02333, InterPro:IPR001841, InterPro:IPR013083, T24D1.3, UniProtKB/TrEMBL:O02333, WormBase:WBGene00011986		4.5539	898.907	0.603934	7.54039	4.68578e-14	1.85039e-12
RCEA025881	BX284603	C03B8.2	C03B8.2, CCD62759.1, CELE_C03B8.2, EnsemblGenomes-Gn:WBGene00015385, EnsemblGenomes-Tr:C03B8.2, GI:351020790, WormBase:WBGene00015385		4.54507	18.7301	1.49986	3.03033	0.00244288	0.00766927
RCEA040018	BX284604	cht-3	CCD63429.1, CELE_C25A8.4, cht-3, EnsemblGenomes-Gn:WBGene00016084, EnsemblGenomes-Tr:C25A8.4, GI:351021159, WormBase:WBGene00016084		4.54358	427.782	0.75103	6.0498	1.45029e-09	2.23697e-08
RCEA054323	BX284604	Y57G11C.45	CCF23369.1, CELE_Y57G11C.45, EnsemblGenomes-Gn:WBGene00013334, EnsemblGenomes-Tr:Y57G11C.45c, GI:371571198, UniProtKB/TrEMBL:H2FLM4, WormBase:WBGene00013334, Y57G11C.45		4.54335	142.679	0.773058	5.87712	4.17469e-09	5.83644e-08
RCEA083009	BX284605	D1086.2	CAB04020.1, CELE_D1086.2, D1086.2, GI:3875336, InterPro:IPR002542, UniProtKB/TrEMBL:O17727, WormBase:WBGene00008389		4.54019	32.8676	1.2546	3.61885	0.000295919	0.00121636
RCEA013825	BX284602	C17C3.5	C17C3.5, CCD64837.1, CELE_C17C3.5, EnsemblGenomes-Gn:WBGene00015890, EnsemblGenomes-Tr:C17C3.5, GI:351050296, InterPro:IPR002900, UniProtKB/TrEMBL:Q18059, WormBase:WBGene00015890		4.5352	38.7146	1.27001	3.571	0.000355614	0.00143243
RCEA010901	BX284602	fbxb-15	CCD63688.1, CELE_ZC204.7, EnsemblGenomes-Gn:WBGene00022557, EnsemblGenomes-Tr:ZC204.7, fbxb-15, GI:351021398, InterPro:IPR001810, InterPro:IPR012885, UniProtKB/TrEMBL:P91541, WormBase:WBGene00022557		4.53203	6.06274	1.94465	2.3305	0.0197795	0.0452906
RCEA032155	BX284604	mul-1	CCD66748.1, CELE_F49F1.6, EnsemblGenomes-Gn:WBGene00018646, EnsemblGenomes-Tr:F49F1.6, GI:373219267, InterPro:IPR003582, mul-1, UniProtKB/TrEMBL:Q9GZE3, WormBase:WBGene00018646		4.53072	63.5874	1.14574	3.9544	7.67279e-05	0.00037567
RCEA070380	BX284604	skr-12	CAM36324.1, CELE_C52D10.6, EnsemblGenomes-Gn:WBGene00004818, EnsemblGenomes-Tr:C52D10.6.1, EnsemblGenomes-Tr:C52D10.6.2, GI:126468447, GOA:G5EGD5, InterPro:IPR001232, InterPro:IPR011333, InterPro:IPR016072, InterPro:IPR016073, InterPro:IPR016897, skr-12, UniProtKB/TrEMBL:G5EGD5, WormBase:WBGene00004818		4.52284	100.128	0.917964	4.92704	8.34865e-07	6.82598e-06
RCEA086595	BX284605	C31G12.4	C31G12.4, CCM09390.1, CELE_C31G12.4, EnsemblGenomes-Gn:WBGene00007853, EnsemblGenomes-Tr:C31G12.4b, GI:403411263, UniProtKB/TrEMBL:J7RNJ8, WormBase:WBGene00007853		4.51973	46.8957	1.16261	3.88759	0.000101246	0.000477577
RCEA082337	BX284605	C50B6.3	C50B6.3, CCE71490.1, CELE_C50B6.3, EnsemblGenomes-Gn:WBGene00008219, EnsemblGenomes-Tr:C50B6.3b, GI:358246428, UniProtKB/TrEMBL:H2L2E3, WormBase:WBGene00008219		4.51924	753.074	0.477422	9.46591	2.91012e-21	4.62096e-19
RCEA029059	BX284603	Y49E10.29	CAM33505.1, CELE_Y49E10.29, EnsemblGenomes-Gn:WBGene00045239, EnsemblGenomes-Tr:Y49E10.29, GI:125629692, GOA:A3FPL3, UniProtKB/TrEMBL:A3FPL3, WormBase:WBGene00045239, Y49E10.29		4.51154	86.0659	1.0039	4.49401	6.98942e-06	4.54463e-05
RCEA042034	BX284604	C46C2.5	C46C2.5, CAB54197.2, CELE_C46C2.5, EnsemblGenomes-Gn:WBGene00008113, EnsemblGenomes-Tr:C46C2.5, GI:14530359, UniProtKB/TrEMBL:Q9U3M0, WormBase:WBGene00008113		4.48351	287.918	0.836656	5.35885	8.37549e-08	8.70739e-07
RCEA074130	BX284605	C49G7.7	C49G7.7, CCD67694.1, CELE_C49G7.7, EnsemblGenomes-Gn:WBGene00016785, EnsemblGenomes-Tr:C49G7.7, GI:351060071, InterPro:IPR003366, UniProtKB/TrEMBL:B1GRK2, WormBase:WBGene00016785		4.48066	70.2656	0.991639	4.51844	6.22981e-06	4.11565e-05
RCEA010451	BX284602	fbxb-41	CCD71286.1, CELE_M01D1.8, EnsemblGenomes-Gn:WBGene00019703, EnsemblGenomes-Tr:M01D1.8, fbxb-41, GI:351063207, InterPro:IPR001810, InterPro:IPR012885, UniProtKB/TrEMBL:O17229, WormBase:WBGene00019703		4.47646	11.6127	1.55675	2.87552	0.00403368	0.0118073
RCEA080233	BX284605	clec-222	CAB03825.2, CELE_C03E10.6, clec-222, EnsemblGenomes-Gn:WBGene00007283, EnsemblGenomes-Tr:C03E10.6, GI:145292088, GOA:O62024, InterPro:IPR001304, InterPro:IPR016186, InterPro:IPR016187, UniProtKB/TrEMBL:O62024, WormBase:WBGene00007283		4.4716	111.195	0.821305	5.44451	5.19477e-08	5.65391e-07
RCEA021832	BX284603	fbxa-50	CCD73939.1, CELE_ZC47.13, EnsemblGenomes-Gn:WBGene00013844, EnsemblGenomes-Tr:ZC47.13a, fbxa-50, GI:351051510, InterPro:IPR001810, InterPro:IPR002900, UniProtKB/TrEMBL:A4F334, WormBase:WBGene00013844	Hypothetical protein	4.47078	13.6619	1.85954	2.40424	0.0162062	0.0382908
RCEA073886	BX284605	W08A12.4	CCD74296.2, CELE_W08A12.4, EnsemblGenomes-Gn:WBGene00021081, EnsemblGenomes-Tr:W08A12.4, GI:919009281, InterPro:IPR026674, UniProtKB/TrEMBL:O01622, W08A12.4, WormBase:WBGene00021081		4.46981	9.71764	1.94377	2.29955	0.0214736	0.0486235
RCEA001712	BX284601	W05F2.3	CCD70009.1, CELE_W05F2.3, EnsemblGenomes-Gn:WBGene00021035, EnsemblGenomes-Tr:W05F2.3, GI:373254310, GOA:Q9TYT8, UniProtKB/TrEMBL:Q9TYT8, W05F2.3, WormBase:WBGene00021035		4.46674	3364.53	0.653879	6.83114	8.42408e-12	2.10045e-10
RCEA013785	BX284602	ZK177.9	CCD64862.1, CELE_ZK177.9, EnsemblGenomes-Gn:WBGene00022674, EnsemblGenomes-Tr:ZK177.9, GI:351050322, WormBase:WBGene00022674, ZK177.9		4.46238	59.7884	0.964659	4.62586	3.73053e-06	2.60654e-05
RCEA070975	BX284604	clec-197	CAB05157.2, CELE_C49C3.12, clec-197, EnsemblGenomes-Gn:WBGene00008202, EnsemblGenomes-Tr:C49C3.12, GI:442535487, GOA:Q9XUG1, InterPro:IPR001304, InterPro:IPR016186, InterPro:IPR016187, UniProtKB/TrEMBL:Q9XUG1, WormBase:WBGene00008202		4.44483	31.8218	1.6519	2.69074	0.00712945	0.0191128
RCEA045498	BX284604	gcy-18	CAB05325.2, CELE_ZK896.8, EnsemblGenomes-Gn:WBGene00001543, EnsemblGenomes-Tr:ZK896.8, gcy-18, GI:186929258, WormBase:WBGene00001543		4.44137	10.7831	1.86997	2.3751	0.0175444	0.0409848
RCEA021095	BX284602	spsb-2	CCD61143.1, CELE_Y46E12BL.3, EnsemblGenomes-Gn:WBGene00021596, EnsemblGenomes-Tr:Y46E12BL.3, GI:373253777, GOA:Q965N7, InterPro:IPR001496, InterPro:IPR001870, InterPro:IPR003877, InterPro:IPR013320, spsb-2, UniProtKB/TrEMBL:Q965N7, WormBase:WBGene00021596	GARP protein	4.43741	456.089	0.662395	6.69904	2.0979e-11	4.77328e-10
RCEA098290	BX284606	K08H2.4	CAA94151.1, CELE_K08H2.4, EnsemblGenomes-Gn:WBGene00010691, EnsemblGenomes-Tr:K08H2.4, GI:3878388, K08H2.4, UniProtKB/TrEMBL:Q21369, WormBase:WBGene00010691		4.43484	7.11916	1.87246	2.36846	0.0178624	0.0415634
RCEA029970	BX284604	T07A9.12	CCD73985.1, CELE_T07A9.12, EnsemblGenomes-Gn:WBGene00020299, EnsemblGenomes-Tr:T07A9.12a, GI:351064952, GOA:H2L0K6, T07A9.12, UniProtKB/TrEMBL:H2L0K6, WormBase:WBGene00020299		4.43208	24.613	1.27789	3.46826	0.000523831	0.00200558
RCEA032701	BX284604	Y17G9B.9	CCD68716.1, CELE_Y17G9B.9, EnsemblGenomes-Gn:WBGene00021206, EnsemblGenomes-Tr:Y17G9B.9, GI:351060968, UniProtKB/TrEMBL:Q9N575, WormBase:WBGene00021206, Y17G9B.9		4.42603	305.174	0.65388	6.76887	1.29789e-11	3.08326e-10
RCEA078545	BX284605	her-1	CAA94804.1, CELE_ZK287.8, EnsemblGenomes-Gn:WBGene00001842, EnsemblGenomes-Tr:ZK287.8a, GI:3881652, her-1, WormBase:WBGene00001842		4.42553	8.06975	1.76915	2.50151	0.0123665	0.0305518
RCEA100021	BX284606	tbh-1	CAZ65507.1, CELE_H13N06.6, GI:242334893, GOA:Q9XTQ6, InterPro:IPR000323, InterPro:IPR000945, InterPro:IPR005018, InterPro:IPR014784, InterPro:IPR020611, InterPro:IPR024548, InterPro:IPR028460, tbh-1, UniProtKB/Swiss-Prot:Q9XTQ6, WormBase:WBGene00006541		4.42202	520.142	0.604851	7.31092	2.65317e-13	8.73868e-12
RCEA002086	BX284601	cyb-2.2	CCD65547.1, CELE_H31G24.4, cyb-2.2, EnsemblGenomes-Gn:WBGene00000867, EnsemblGenomes-Tr:H31G24.4.1, EnsemblGenomes-Tr:H31G24.4.2, GI:351058177, GOA:Q9BLB5, InterPro:IPR004367, InterPro:IPR006671, InterPro:IPR013763, UniProtKB/TrEMBL:Q9BLB5, WormBase:WBGene00000867		4.41864	834.42	0.651143	6.78598	1.15301e-11	2.77403e-10
RCEA046452	BX284604	fbxa-215	CAB16478.1, CELE_Y45F10C.3, EnsemblGenomes-Gn:WBGene00012879, EnsemblGenomes-Tr:Y45F10C.3, fbxa-215, GI:3880969, InterPro:IPR001810, InterPro:IPR002900, UniProtKB/TrEMBL:O62474, WormBase:WBGene00012879		4.41791	708.138	0.585451	7.54616	4.48277e-14	1.77617e-12
RCEA021712	BX284603	kbp-4	CCD62277.1, CELE_Y92C3B.1, EnsemblGenomes-Gn:WBGene00022357, EnsemblGenomes-Tr:Y92C3B.1, GI:351018333, GOA:Q9N2X3, kbp-4, UniProtKB/TrEMBL:Q9N2X3, WormBase:WBGene00022357		4.41391	164.557	0.642406	6.87091	6.37953e-12	1.6174e-10
RCEA045950	BX284604	Y62E10A.14	CAB60601.1, CELE_Y62E10A.14, EnsemblGenomes-Gn:WBGene00013380, EnsemblGenomes-Tr:Y62E10A.14, GI:6425499, UniProtKB/TrEMBL:Q9U1X3, WormBase:WBGene00013380, Y62E10A.14		4.40765	359.073	0.944374	4.66728	3.0522e-06	2.17387e-05
RCEA012111	BX284602	gcy-19	CCD64916.1, CELE_C17F4.6, EnsemblGenomes-Gn:WBGene00001544, EnsemblGenomes-Tr:C17F4.6, gcy-19, GI:351050382, GOA:O16544, InterPro:IPR000719, InterPro:IPR001054, InterPro:IPR001828, InterPro:IPR011009, InterPro:IPR018297, InterPro:IPR028082, InterPro:IPR029787, UniProtKB/Swiss-Prot:O16544, WormBase:WBGene00001544		4.40736	55.0314	1.00329	4.39292	1.11838e-05	6.86918e-05
RCEA019297	BX284602	Y57A10A.8	CAB55013.2, CELE_Y57A10A.8, EnsemblGenomes-Gn:WBGene00013253, EnsemblGenomes-Tr:Y57A10A.8, GI:34556093, InterPro:IPR006570, UniProtKB/TrEMBL:Q9NA84, WormBase:WBGene00013253, Y57A10A.8		4.37882	86.763	0.804657	5.44184	5.27324e-08	5.73517e-07
RCEA005751	BX284601	C17E4.20	C17E4.20, CCF23392.1, CELE_C17E4.20, EnsemblGenomes-Gn:WBGene00219313, EnsemblGenomes-Tr:C17E4.20, GI:371571127, UniProtKB/TrEMBL:H2FLI6, WormBase:WBGene00219313		4.37708	55.2329	1.00153	4.37039	1.24024e-05	7.52575e-05
RCEA041335	BX284604	D2096.12	CCD68517.1, CELE_D2096.12, D2096.12, EnsemblGenomes-Gn:WBGene00017079, EnsemblGenomes-Tr:D2096.12, GI:351060781, UniProtKB/TrEMBL:Q86ME1, WormBase:WBGene00017079		4.37509	207.248	0.686009	6.3776	1.79886e-10	3.40901e-09
RCEA027637	BX284603	K03H1.7	CAA82659.1, CELE_K03H1.7, EnsemblGenomes-Gn:WBGene00010542, EnsemblGenomes-Tr:K03H1.7, GI:3878173, K03H1.7, UniProtKB/TrEMBL:Q21196, WormBase:WBGene00010542		4.37443	120.737	0.779756	5.60999	2.02335e-08	2.45355e-07
RCEA073013	BX284605	C29G2.2	C29G2.2, CELE_C29G2.2, EnsemblGenomes-Gn:WBGene00016230, EnsemblGenomes-Tr:C29G2.2, UniProtKB/TrEMBL:O16888		4.37272	17.7957	1.63921	2.66758	0.00764008	0.0202799
RCEA071113	BX284604	F11E6.7	CAB02920.1, CELE_F11E6.7, EnsemblGenomes-Gn:WBGene00008710, EnsemblGenomes-Tr:F11E6.7, F11E6.7, GI:3924723, GOA:Q9XVR0, InterPro:IPR028566, UniProtKB/TrEMBL:Q9XVR0, WormBase:WBGene00008710		4.3712	707.603	0.586717	7.45026	9.31581e-14	3.42754e-12
RCEA086020	BX284605	lsy-27	CAB07203.1, CELE_F47H4.1, GI:3877333, GOA:O45526, InterPro:IPR007087, InterPro:IPR015880, lsy-27, UniProtKB/TrEMBL:O45526, WormBase:WBGene00009834		4.36973	99.4022	0.712765	6.13067	8.75111e-10	1.43334e-08
RCEA010338	BX284602	fbxc-29	CCD66388.1, CELE_R07C3.7, EnsemblGenomes-Gn:WBGene00019923, EnsemblGenomes-Tr:R07C3.7, fbxc-29, GI:351058690, UniProtKB/TrEMBL:A3KFD9, WormBase:WBGene00019923		4.36033	10.3724	1.77831	2.45196	0.0142081	0.0343477
RCEA001084	BX284601	ugt-31	CCD69904.1, CELE_Y39G10AR.6, EnsemblGenomes-Gn:WBGene00021464, EnsemblGenomes-Tr:Y39G10AR.6, GI:351062029, GOA:Q86S61, InterPro:IPR002213, ugt-31, UniProtKB/TrEMBL:Q86S61, WormBase:WBGene00021464	UDP-glucuronosyltransferase (EC 2.4.1.17)	4.358	527.337	0.576769	7.55588	4.16023e-14	1.66464e-12
RCEA044166	BX284604	gfat-2	CAA92735.1, CELE_F22B3.4, EnsemblGenomes-Gn:WBGene00009035, EnsemblGenomes-Tr:F22B3.4, gfat-2, GI:3876197, GOA:Q19699, InterPro:IPR001347, InterPro:IPR005855, InterPro:IPR017932, InterPro:IPR029055, UniProtKB/TrEMBL:Q19699, WormBase:WBGene00009035	Glucosamine--fructose-6-phosphate aminotransferase [isomerizing] (EC 2.6.1.16)	4.35531	5190.8	0.59474	7.32304	2.42417e-13	8.0904e-12
RCEA099141	BX284606	F23D12.2	CAA94917.4, CELE_F23D12.2, EnsemblGenomes-Gn:WBGene00009086, EnsemblGenomes-Tr:F23D12.2, F23D12.2, GI:297374684, UniProtKB/TrEMBL:Q19761, WormBase:WBGene00009086		4.34773	17.741	1.55702	2.79234	0.0052329	0.0147521
RCEA041639	BX284604	C33D9.9	C33D9.9, CELE_C33D9.9		4.34652	14.6822	1.58358	2.74475	0.00605574	0.0166729
RCEA083022	BX284605	H39E23.3	CAI79216.1, CELE_H39E23.3, EnsemblGenomes-Gn:WBGene00044201, EnsemblGenomes-Tr:H39E23.3, GI:62554056, H39E23.3, UniProtKB/TrEMBL:Q564Q6, WormBase:WBGene00044201		4.34451	8.35702	1.82738	2.37746	0.0174325	0.0407942
RCEA010859	BX284602	fbxa-163	CCD63670.1, CELE_C08E3.6, EnsemblGenomes-Gn:WBGene00015598, EnsemblGenomes-Tr:C08E3.6, fbxa-163, GI:351021379, InterPro:IPR001810, InterPro:IPR002900, UniProtKB/TrEMBL:O17196, WormBase:WBGene00015598		4.34015	236.025	0.918646	4.72451	2.3067e-06	1.68833e-05
RCEA011313	BX284602	gba-2	CCD66456.1, CELE_C33C12.8, EnsemblGenomes-Gn:WBGene00016340, EnsemblGenomes-Tr:C33C12.8, gba-2, GI:373219209, WormBase:WBGene00016340	Glucosylceramidase (EC 3.2.1.45)	4.33658	34.8633	1.37647	3.15051	0.00162988	0.00538592
RCEA080062	BX284605	C06H2.7	C06H2.7, CCH63810.1, CELE_C06H2.7, GI:387912289, UniProtKB/TrEMBL:I2HAA3, WormBase:WBGene00007391		4.33647	128.809	0.69943	6.20001	5.64597e-10	9.58036e-09
RCEA012982	BX284602	B0304.4	B0304.4, CCD61736.1, CELE_B0304.4, EnsemblGenomes-Gn:WBGene00015136, EnsemblGenomes-Tr:B0304.4, GI:351065756, WormBase:WBGene00015136		4.33361	104.403	0.980361	4.42042	9.85083e-06	6.14811e-05
RCEA004898	BX284601	kri-1	CAB03514.2, CELE_ZK265.1, EnsemblGenomes-Gn:WBGene00013955, EnsemblGenomes-Tr:ZK265.1a, GI:58081798, GOA:G5EDH0, InterPro:IPR000299, InterPro:IPR002110, InterPro:IPR019748, InterPro:IPR019749, InterPro:IPR020683, InterPro:IPR032022, kri-1, UniProtKB/TrEMBL:G5EDH0, WormBase:WBGene00013955		4.33326	14.2134	1.7102	2.53378	0.011284	0.0283697
RCEA046044	BX284604	puf-3	CAB63369.1, CELE_Y45F10A.2, EnsemblGenomes-Gn:WBGene00004239, EnsemblGenomes-Tr:Y45F10A.2, GI:6580298, GOA:Q9U2G4, InterPro:IPR001313, InterPro:IPR011989, InterPro:IPR016024, puf-3, UniProtKB/TrEMBL:Q9U2G4, WormBase:WBGene00004239	Hypothetical protein	4.32462	4478.2	0.494575	8.74412	2.24755e-18	2.04167e-16
RCEA076969	BX284605	T05B11.4	CCD65787.1, CELE_T05B11.4, EnsemblGenomes-Gn:WBGene00020247, EnsemblGenomes-Tr:T05B11.4, GI:373254073, GOA:Q22213, InterPro:IPR008166, T05B11.4, UniProtKB/TrEMBL:Q22213, WormBase:WBGene00020247		4.32414	162.64	0.579379	7.46341	8.43139e-14	3.15602e-12
RCEA093990	BX284606	F48E3.4	CCD71303.1, CELE_F48E3.4, EnsemblGenomes-Gn:WBGene00018605, EnsemblGenomes-Tr:F48E3.4, F48E3.4, GI:373219940, GOA:Q9GPA1, InterPro:IPR001254, InterPro:IPR009003, UniProtKB/TrEMBL:Q9GPA1, WormBase:WBGene00018605		4.31863	533.784	0.718244	6.01277	1.82383e-09	2.74301e-08
RCEA013772	BX284602	F12A10.8	CCD69295.1, CELE_F12A10.8, EnsemblGenomes-Gn:WBGene00017397, EnsemblGenomes-Tr:F12A10.8, F12A10.8, GI:351061506, WormBase:WBGene00017397		4.3176	90.4663	0.81692	5.28522	1.25555e-07	1.26217e-06
RCEA019209	BX284602	mex-1	CAA91362.2, CELE_W03C9.7, GI:14530587, GOA:G5ECB9, InterPro:IPR000571, mex-1, UniProtKB/TrEMBL:G5ECB9, WormBase:WBGene00003228		4.31086	967.35	0.554334	7.77665	7.44697e-15	3.40004e-13
RCEA020299	BX284602	W02B8.2	CAB03458.1, CELE_W02B8.2, EnsemblGenomes-Gn:WBGene00012198, EnsemblGenomes-Tr:W02B8.2, GI:3880401, GOA:Q9XVH4, InterPro:IPR001180, InterPro:IPR001849, InterPro:IPR002219, InterPro:IPR011993, UniProtKB/TrEMBL:Q9XVH4, W02B8.2, WormBase:WBGene00012198		4.31079	225.325	0.594461	7.2516	4.11882e-13	1.3053e-11
RCEA030679	BX284604	dsl-3	CCD66710.1, CELE_Y41D4B.10, dsl-3, EnsemblGenomes-Gn:WBGene00001105, EnsemblGenomes-Tr:Y41D4B.10a, GI:351058909, GOA:Q95Y10, InterPro:IPR000742, InterPro:IPR001774, InterPro:IPR013032, UniProtKB/TrEMBL:Q95Y10, WormBase:WBGene00001105		4.30682	49.7177	0.949411	4.53631	5.72475e-06	3.82718e-05
RCEA004379	BX284601	inx-14	CAA96621.1, CELE_F07A5.1, GI:3875471, inx-14, WormBase:WBGene00002136		4.3065	526.469	0.672577	6.40298	1.52368e-10	2.92427e-09
RCEA082030	BX284605	T16G1.5	CAB04727.1, CELE_T16G1.5, EnsemblGenomes-Gn:WBGene00011799, EnsemblGenomes-Tr:T16G1.5, GI:3879846, InterPro:IPR011009, InterPro:IPR012877, InterPro:IPR015897, T16G1.5, UniProtKB/TrEMBL:Q9XUP8, WormBase:WBGene00011799		4.29946	154.139	0.793716	5.41687	6.06514e-08	6.47965e-07
RCEA078266	BX284605	try-5	CCD68623.1, CELE_K07B1.1, EnsemblGenomes-Gn:WBGene00006623, EnsemblGenomes-Tr:K07B1.1.1, EnsemblGenomes-Tr:K07B1.1.2, EnsemblGenomes-Tr:K07B1.1.3, GI:351060884, GOA:O01887, InterPro:IPR001254, InterPro:IPR001314, InterPro:IPR009003, InterPro:IPR018114, try-5, UniProtKB/TrEMBL:O01887, WormBase:WBGene00006623		4.28304	19.5331	1.79238	2.38958	0.0168675	0.0396395
RCEA083319	BX284605	egl-1	CAB82213.2, CELE_F23B12.9, egl-1, EnsemblGenomes-Gn:WBGene00001170, EnsemblGenomes-Tr:F23B12.9, GI:35210147, WormBase:WBGene00001170		4.2815	14.7381	1.43916	2.97501	0.00292983	0.00894303
RCEA017293	BX284602	T19H5.7	CAN99724.1, CELE_T19H5.7, EnsemblGenomes-Gn:WBGene00045414, EnsemblGenomes-Tr:T19H5.7, GI:148879268, T19H5.7, UniProtKB/TrEMBL:A5Z2S1, WormBase:WBGene00045414		4.2741	15.1121	1.56766	2.72642	0.00640246	0.0174839
RCEA022478	BX284603	Y54F10AM.11	CCD73829.1, CELE_Y54F10AM.11, EnsemblGenomes-Gn:WBGene00021853, EnsemblGenomes-Tr:Y54F10AM.11, GI:373254575, InterPro:IPR000210, InterPro:IPR011333, UniProtKB/TrEMBL:Q9BKZ7, WormBase:WBGene00021853, Y54F10AM.11		4.27054	175.729	0.791024	5.39875	6.71052e-08	7.12874e-07
RCEA032150	BX284604	drd-50	CCD66745.1, CELE_F49F1.1, drd-50, EnsemblGenomes-Gn:WBGene00018643, EnsemblGenomes-Tr:F49F1.1, GI:373219264, GOA:Q9GZE5, InterPro:IPR003582, UniProtKB/TrEMBL:Q9GZE5, WormBase:WBGene00018643		4.26877	94.5377	0.8748	4.87971	1.06243e-06	8.48875e-06
RCEA083992	BX284605	Y75B12B.1	CBG22752.1, CELE_Y75B12B.1, EnsemblGenomes-Gn:WBGene00013567, EnsemblGenomes-Tr:Y75B12B.1b, GI:260161119, UniProtKB/TrEMBL:C8TDI7, WormBase:WBGene00013567, Y75B12B.1		4.26691	1447.27	0.553873	7.70376	1.32119e-14	5.74356e-13
RCEA082981	BX284605	D1086.6	CAB04023.4, CELE_D1086.6, D1086.6, EnsemblGenomes-Gn:WBGene00008393, EnsemblGenomes-Tr:D1086.6, GI:206994331, UniProtKB/TrEMBL:O17729, WormBase:WBGene00008393		4.26205	1442.22	0.893602	4.76951	1.84675e-06	1.38588e-05
RCEA026608	BX284603	polk-1	CCD62142.1, CELE_F22B7.6, GI:373253818, polk-1, WormBase:WBGene00017696		4.25996	248.631	0.643931	6.61555	3.70166e-11	8.09269e-10
RCEA008294	BX284601	bath-34	bath-34, CAB04892.1, CELE_W02A11.5, EnsemblGenomes-Gn:WBGene00012195, EnsemblGenomes-Tr:W02A11.5, GI:3880443, WormBase:WBGene00012195		4.25977	15.0388	1.70344	2.50069	0.012395	0.0306022
RCEA074055	BX284605	cyp-34A5	CCD61360.1, CELE_B0213.10, cyp-34A5, EnsemblGenomes-Gn:WBGene00015040, EnsemblGenomes-Tr:B0213.10, GI:351065389, GOA:O44655, InterPro:IPR001128, InterPro:IPR002401, InterPro:IPR017972, UniProtKB/TrEMBL:O44655, WormBase:WBGene00015040	Cytochrome P450 (EC 1.14.14.1)	4.25731	11.9876	1.48692	2.86317	0.0041942	0.0122095
RCEA005548	BX284601	clec-91	CAB02136.1, CELE_ZK858.3, clec-91, EnsemblGenomes-Gn:WBGene00014117, EnsemblGenomes-Tr:ZK858.3, GI:3881851, WormBase:WBGene00014117		4.25716	991.635	0.543044	7.83944	4.52545e-15	2.1005e-13
RCEA101086	BX284606	C33E10.3	C33E10.3, CELE_C33E10.3		4.25696	9.42723	1.63248	2.60766	0.00911637	0.0236982
RCEA007726	BX284601	fbxa-123	CELE_Y53C10A.14, fbxa-123		4.25639	25.7604	1.52506	2.79096	0.00525516	0.014812
RCEA027177	BX284603	cpar-1	CAA80154.1, CELE_F54C8.2, cpar-1, EnsemblGenomes-Gn:WBGene00010036, EnsemblGenomes-Tr:F54C8.2, GI:3877486, WormBase:WBGene00010036		4.25459	326.612	0.643701	6.60958	3.854e-11	8.38926e-10
RCEA000163	BX284601	Y48G1A.2	CCD67940.1, CELE_Y48G1A.2, EnsemblGenomes-Gn:WBGene00021658, EnsemblGenomes-Tr:Y48G1A.2, GI:351060310, UniProtKB/TrEMBL:Q9N3Q6, WormBase:WBGene00021658, Y48G1A.2		4.25011	125.523	0.768913	5.52743	3.24962e-08	3.72214e-07
RCEA019053	BX284602	F43G6.3	CELE_F43G6.3, F43G6.3		4.24918	38.9025	1.11052	3.82631	0.000130081	0.00059571
RCEA097318	BX284606	F54F7.2	CAA91755.2, CELE_F54F7.2, EnsemblGenomes-Gn:WBGene00010064, EnsemblGenomes-Tr:F54F7.2, F54F7.2, GI:54110643, UniProtKB/TrEMBL:Q20789, WormBase:WBGene00010064		4.24456	101.605	0.85056	4.99031	6.02822e-07	5.13471e-06
RCEA075461	BX284605	cpg-4	CCD64120.1, CELE_C10F3.1, cpg-4, EnsemblGenomes-Gn:WBGene00015677, EnsemblGenomes-Tr:C10F3.1, GI:351050041, WormBase:WBGene00015677		4.23683	507.901	0.580841	7.2943	3.00218e-13	9.82384e-12
RCEA008119	BX284601	ssp-37	CAB03462.1, CELE_W02D9.5, EnsemblGenomes-Gn:WBGene00012211, EnsemblGenomes-Tr:W02D9.5, GI:3880405, InterPro:IPR000535, InterPro:IPR008962, ssp-37, UniProtKB/TrEMBL:Q9XVH1, WormBase:WBGene00012211		4.23609	51.3009	1.05072	4.03161	5.53957e-05	0.000281172
RCEA041572	BX284604	parg-2	CCD68980.1, CELE_H23L24.5, EnsemblGenomes-Gn:WBGene00004052, EnsemblGenomes-Tr:H23L24.5, GI:351061216, parg-2, WormBase:WBGene00004052		4.23288	100.984	0.98204	4.3103	1.63035e-05	9.6551e-05
RCEA002135	BX284601	egg-5	CCD65177.1, CELE_R12E2.10, egg-5, EnsemblGenomes-Gn:WBGene00020035, EnsemblGenomes-Tr:R12E2.10, GI:351050576, GOA:O61789, InterPro:IPR000242, InterPro:IPR000387, InterPro:IPR028855, InterPro:IPR029021, UniProtKB/TrEMBL:O61789, WormBase:WBGene00020035		4.23242	957.357	0.664707	6.36735	1.92326e-10	3.62654e-09
RCEA038841	BX284604	puf-11	CCD74185.1, CELE_Y73B6BL.38, EnsemblGenomes-Gn:WBGene00022257, EnsemblGenomes-Tr:Y73B6BL.38, GI:351059342, GOA:Q8IU00, InterPro:IPR001313, InterPro:IPR011989, InterPro:IPR016024, puf-11, UniProtKB/TrEMBL:Q8IU00, WormBase:WBGene00022257	Hypothetical protein	4.19453	2917.79	0.508289	8.25226	1.55431e-16	9.64888e-15
RCEA076130	BX284605	spn-4	CCD72494.1, CELE_ZC404.8, EnsemblGenomes-Gn:WBGene00004984, EnsemblGenomes-Tr:ZC404.8.1, EnsemblGenomes-Tr:ZC404.8.2, GI:351064206, GOA:G5EF02, InterPro:IPR000504, InterPro:IPR012677, spn-4, UniProtKB/TrEMBL:G5EF02, WormBase:WBGene00004984		4.19182	3460.25	0.537629	7.79687	6.34637e-15	2.90988e-13
RCEA020533	BX284602	Y54G11A.1	CAA22455.2, CELE_Y54G11A.1, EnsemblGenomes-Gn:WBGene00013212, EnsemblGenomes-Tr:Y54G11A.1, GI:548931432, GOA:Q9XVZ7, UniProtKB/TrEMBL:Q9XVZ7, WormBase:WBGene00013212, Y54G11A.1		4.18181	269.661	0.622942	6.713	1.90661e-11	4.37766e-10
RCEA010442	BX284602	btb-11	btb-11, CCD71284.1, CELE_M01D1.3, EnsemblGenomes-Gn:WBGene00019700, EnsemblGenomes-Tr:M01D1.3, GI:351063205, InterPro:IPR000210, InterPro:IPR011333, UniProtKB/TrEMBL:O17223, WormBase:WBGene00019700		4.18137	10.6401	1.51489	2.76017	0.00577705	0.016002
RCEA041328	BX284604	D2096.13	CCD68518.1, CELE_D2096.13, D2096.13, EnsemblGenomes-Gn:WBGene00044953, EnsemblGenomes-Tr:D2096.13, GI:351060782, UniProtKB/TrEMBL:Q0MQ67, WormBase:WBGene00044953		4.1804	14.388	1.54542	2.70502	0.00683002	0.0184473
RCEA009097	BX284601	fipr-24	CAB07335.1, CELE_C37A5.8, EnsemblGenomes-Gn:WBGene00007992, EnsemblGenomes-Tr:C37A5.8, fipr-24, GI:3874811, UniProtKB/TrEMBL:O62093, WormBase:WBGene00007992	Hypothetical protein	4.17783	90.2507	1.26355	3.30642	0.000944957	0.00333833
RCEA012798	BX284602	R03H10.6	CCD70303.1, CELE_R03H10.6, EnsemblGenomes-Gn:WBGene00019858, EnsemblGenomes-Tr:R03H10.6, GI:351062333, GOA:Q9GYL9, InterPro:IPR012340, InterPro:IPR031657, R03H10.6, UniProtKB/TrEMBL:Q9GYL9, WormBase:WBGene00019858		4.17379	100.834	0.849409	4.91376	8.93484e-07	7.25805e-06
RCEA082838	BX284605	C06B3.7	C06B3.7, CAB01117.2, CELE_C06B3.7, EnsemblGenomes-Gn:WBGene00007366, EnsemblGenomes-Tr:C06B3.7, GI:15718039, UniProtKB/TrEMBL:Q17706, WormBase:WBGene00007366		4.17194	71.5047	0.805417	5.17985	2.2206e-07	2.10413e-06
RCEA098441	BX284606	C29F7.10	C29F7.10, CBZ01814.1, CELE_C29F7.10, EnsemblGenomes-Gn:WBGene00206389, EnsemblGenomes-Tr:C29F7.10, GI:320202913, UniProtKB/TrEMBL:E9P8A1, WormBase:WBGene00206389		4.17192	19.3642	1.49107	2.79794	0.00514292	0.0145528
RCEA084864	BX284605	F14H3.4	CAB05486.2, CELE_F14H3.4, EnsemblGenomes-Gn:WBGene00008823, EnsemblGenomes-Tr:F14H3.4, F14H3.4, GI:242334876, UniProtKB/TrEMBL:O45366, WormBase:WBGene00008823		4.16919	104.947	0.840975	4.95757	7.13794e-07	5.96873e-06
RCEA077035	BX284605	C37C3.9	C37C3.9, CCD66951.1, CELE_C37C3.9, EnsemblGenomes-Gn:WBGene00016501, EnsemblGenomes-Tr:C37C3.9, GI:351059098, InterPro:IPR000210, InterPro:IPR011333, UniProtKB/TrEMBL:Q22917, WormBase:WBGene00016501		4.16862	459.259	0.664616	6.27222	3.55941e-10	6.25801e-09
RCEA027934	BX284603	tbx-9	CAA82575.2, CELE_T07C4.6, EnsemblGenomes-Gn:WBGene00006546, EnsemblGenomes-Tr:T07C4.6, GI:51011748, tbx-9, WormBase:WBGene00006546		4.16588	79.2919	0.930391	4.47756	7.55024e-06	4.85695e-05
RCEA045902	BX284604	mex-5	CAB05310.1, CELE_W02A2.7, EnsemblGenomes-Gn:WBGene00003230, EnsemblGenomes-Tr:W02A2.7, GI:4008408, mex-5, WormBase:WBGene00003230		4.15843	2730.28	0.464309	8.95619	3.36098e-19	3.67394e-17
RCEA031474	BX284604	T23E1.2	CELE_T23E1.2, T23E1.2		4.15289	16.3987	1.47961	2.80674	0.0050045	0.0142332
RCEA099139	BX284606	F23D12.10	CAM35835.1, CELE_F23D12.10, EnsemblGenomes-Gn:WBGene00045291, EnsemblGenomes-Tr:F23D12.10, F23D12.10, GI:126363065, UniProtKB/TrEMBL:A3RMT9, WormBase:WBGene00045291		4.15036	14.3609	1.71896	2.41446	0.0157583	0.0374207
RCEA004294	BX284601	ztf-15	CAA95846.2, CELE_R06C7.9, EnsemblGenomes-Gn:WBGene00011066, EnsemblGenomes-Tr:R06C7.9a, GI:25004999, GOA:Q21777, InterPro:IPR007087, InterPro:IPR015880, UniProtKB/TrEMBL:Q21777, WormBase:WBGene00011066, ztf-15		4.13838	319.978	0.699242	5.91837	3.25146e-09	4.63157e-08
RCEA012951	BX284602	T12C9.7	CCD73615.1, CELE_T12C9.7, EnsemblGenomes-Gn:WBGene00020461, EnsemblGenomes-Tr:T12C9.7a, GI:373220507, GOA:H2L0L4, InterPro:IPR004367, InterPro:IPR006671, InterPro:IPR013763, T12C9.7, UniProtKB/TrEMBL:H2L0L4, WormBase:WBGene00020461		4.13471	80.3229	0.922537	4.4819	7.39822e-06	4.77136e-05
RCEA041372	BX284604	M116.5	CCD68524.2, CELE_M116.5, EnsemblGenomes-Gn:WBGene00019792, EnsemblGenomes-Tr:M116.5, GI:604719511, GOA:Q965L0, InterPro:IPR001589, InterPro:IPR001715, InterPro:IPR003108, M116.5, UniProtKB/TrEMBL:Q965L0, WormBase:WBGene00019792		4.13197	55.061	0.945225	4.37141	1.23445e-05	7.49704e-05
RCEA089597	BX284606	igcm-4	CCD71592.1, CELE_Y102A11A.8, EnsemblGenomes-Gn:WBGene00022418, EnsemblGenomes-Tr:Y102A11A.8, GI:351063409, GOA:Q95XJ7, igcm-4, InterPro:IPR003598, InterPro:IPR003599, InterPro:IPR007110, InterPro:IPR013098, InterPro:IPR013783, UniProtKB/TrEMBL:Q95XJ7, WormBase:WBGene00022418		4.11956	23.8789	1.70785	2.41213	0.0158595	0.0376106
RCEA023058	BX284603	C14B1.9	C14B1.9, CAA85490.2, CELE_C14B1.9, EnsemblGenomes-Gn:WBGene00007580, EnsemblGenomes-Tr:C14B1.9, GI:224490512, InterPro:IPR029153, UniProtKB/TrEMBL:Q17966, WormBase:WBGene00007580		4.11704	710.87	0.642875	6.4041	1.51258e-10	2.90666e-09
RCEA012556	BX284602	T24E12.5	CCD69332.1, CELE_T24E12.5, EnsemblGenomes-Gn:WBGene00020774, EnsemblGenomes-Tr:T24E12.5, GI:373254268, GOA:Q965K6, T24E12.5, UniProtKB/TrEMBL:Q965K6, WormBase:WBGene00020774		4.1104	132.085	0.728642	5.64117	1.68898e-08	2.08325e-07
RCEA028020	BX284603	sip-1	CAA84703.1, CELE_F43D9.4, EnsemblGenomes-Gn:WBGene00004798, EnsemblGenomes-Tr:F43D9.4, GI:3877053, sip-1, WormBase:WBGene00004798		4.10977	11923.8	0.565752	7.26426	3.75097e-13	1.2039e-11
RCEA082335	BX284605	nasp-2	CAB02850.1, CELE_C50B6.2, EnsemblGenomes-Gn:WBGene00008218, EnsemblGenomes-Tr:C50B6.2, GI:3875052, InterPro:IPR019544, nasp-2, UniProtKB/TrEMBL:O17687, WormBase:WBGene00008218		4.10438	7292.89	0.460945	8.90428	5.37354e-19	5.59034e-17
RCEA013367	BX284602	lrr-1	CCD65793.1, CELE_F33G12.4, EnsemblGenomes-Gn:WBGene00018016, EnsemblGenomes-Tr:F33G12.4.1, EnsemblGenomes-Tr:F33G12.4.2, GI:351058346, GOA:Q19988, lrr-1, UniProtKB/TrEMBL:Q19988, WormBase:WBGene00018016		4.09236	536.698	0.660203	6.19863	5.69556e-10	9.62827e-09
RCEA015752	BX284602	F18A1.7	CCD62045.1, CELE_F18A1.7, EnsemblGenomes-Gn:WBGene00017548, EnsemblGenomes-Tr:F18A1.7, F18A1.7, GI:351018140, InterPro:IPR029153, UniProtKB/TrEMBL:Q19536, WormBase:WBGene00017548		4.08181	1698.16	0.469575	8.69256	3.54371e-18	3.05467e-16
RCEA086209	BX284605	ztf-25	CAB07491.1, CELE_Y6G8.3, EnsemblGenomes-Gn:WBGene00012405, EnsemblGenomes-Tr:Y6G8.3, GI:3881251, GOA:O01709, InterPro:IPR007087, InterPro:IPR015880, UniProtKB/TrEMBL:O01709, WormBase:WBGene00012405, ztf-25		4.07227	112.717	0.621955	6.54753	5.84948e-11	1.22046e-09
RCEA022136	BX284603	pqn-82	CCD62168.1, CELE_Y39A3CR.7, EnsemblGenomes-Gn:WBGene00004163, EnsemblGenomes-Tr:Y39A3CR.7, GI:351018244, pqn-82, UniProtKB/TrEMBL:Q9N411, WormBase:WBGene00004163		4.06419	108.518	0.724912	5.60646	2.06504e-08	2.50009e-07
RCEA012478	BX284602	F19B10.2	CCD69693.1, CELE_F19B10.2, EnsemblGenomes-Gn:WBGene00017584, EnsemblGenomes-Tr:F19B10.2, F19B10.2, GI:351061840, UniProtKB/TrEMBL:O02074, WormBase:WBGene00017584		4.06064	64.1337	0.787025	5.15949	2.47628e-07	2.31914e-06
RCEA083014	BX284605	D1086.1	CAB04019.1, CELE_D1086.1, D1086.1, EnsemblGenomes-Gn:WBGene00008388, EnsemblGenomes-Tr:D1086.1, GI:3875335, InterPro:IPR002542, InterPro:IPR016638, UniProtKB/TrEMBL:O17726, WormBase:WBGene00008388		4.05606	64.1773	0.951523	4.2627	2.01974e-05	0.000116353
RCEA077428	BX284605	mom-2	CCD63659.1, CELE_F38E1.7, EnsemblGenomes-Gn:WBGene00003395, EnsemblGenomes-Tr:F38E1.7, GI:351021367, mom-2, WormBase:WBGene00003395	WNT-2B protein precursor	4.05527	639.815	0.638515	6.35109	2.13794e-10	3.9523e-09
RCEA041322	BX284604	F17E9.3	CCD68527.1, CELE_F17E9.3, EnsemblGenomes-Gn:WBGene00017540, EnsemblGenomes-Tr:F17E9.3, F17E9.3, GI:351060793, UniProtKB/TrEMBL:O61523, WormBase:WBGene00017540		4.05523	25.5825	1.6182	2.506	0.0122104	0.0302355
RCEA012210	BX284602	bath-30	bath-30, CCD69486.1, CELE_F14D2.12, EnsemblGenomes-Gn:WBGene00017460, EnsemblGenomes-Tr:F14D2.12, GI:351061640, InterPro:IPR000210, InterPro:IPR002083, InterPro:IPR008974, InterPro:IPR011333, UniProtKB/TrEMBL:Q8MXH8, WormBase:WBGene00017460		4.04563	364.235	0.514985	7.85582	3.9718e-15	1.8665e-13
RCEA085503	BX284605	gyg-2	CAB04823.1, CELE_T25E12.5, EnsemblGenomes-Gn:WBGene00012020, EnsemblGenomes-Tr:T25E12.5, GI:3880227, GOA:O45819, gyg-2, InterPro:IPR002495, InterPro:IPR029044, UniProtKB/TrEMBL:O45819, WormBase:WBGene00012020	Glycogenin (EC 2.4.1.186)	4.04264	1835.85	0.689913	5.85964	4.63859e-09	6.43727e-08
RCEA084481	BX284605	Y6E2A.4	CAA15963.3, CELE_Y6E2A.4, EnsemblGenomes-Gn:WBGene00012398, EnsemblGenomes-Tr:Y6E2A.4, GI:169402810, InterPro:IPR007883, UniProtKB/TrEMBL:O45969, WormBase:WBGene00012398, Y6E2A.4		4.04031	7.64746	1.73379	2.33034	0.0197884	0.0453039
RCEA004586	BX284601	F27D4.3	CELE_F27D4.3, F27D4.3		4.03737	38.4848	1.03686	3.89384	9.86701e-05	0.00046635
RCEA002015	BX284601	egg-4	CCD71367.1, CELE_T21E3.1, egg-4, EnsemblGenomes-Gn:WBGene00020652, EnsemblGenomes-Tr:T21E3.1, GI:351063243, GOA:O01767, InterPro:IPR000242, InterPro:IPR000387, InterPro:IPR028855, InterPro:IPR029021, UniProtKB/TrEMBL:O01767, WormBase:WBGene00020652		4.01936	1019.36	0.451011	8.91189	5.01697e-19	5.29238e-17
RCEA084648	BX284605	fbxa-197	CAB03304.1, CELE_T06C12.4, EnsemblGenomes-Gn:WBGene00011513, EnsemblGenomes-Tr:T06C12.4, fbxa-197, GI:3879614, InterPro:IPR002900, UniProtKB/TrEMBL:O18043, WormBase:WBGene00011513		4.01318	39.3074	1.17996	3.40112	0.000671113	0.00249046
RCEA004570	BX284601	gna-2	CAB03416.1, CELE_T23G11.2, EnsemblGenomes-Gn:WBGene00001647, EnsemblGenomes-Tr:T23G11.2, GI:3880112, gna-2, GOA:G5EC27, InterPro:IPR000182, InterPro:IPR016181, UniProtKB/TrEMBL:G5EC27, WormBase:WBGene00001647		4.00734	652.887	0.478301	8.37827	5.37092e-17	3.71653e-15
RCEA031212	BX284604	egrh-3	CDH93023.1, CELE_Y94H6A.11, egrh-3, GI:548932403, GOA:U4PLQ8, InterPro:IPR007087, InterPro:IPR013087, InterPro:IPR015880, UniProtKB/TrEMBL:U4PLQ8, WormBase:WBGene00044651		3.99543	105.489	0.675014	5.91903	3.23842e-09	4.61736e-08
RCEA000608	BX284601	Y48G8AR.2	CCD72955.1, CELE_Y48G8AR.2, EnsemblGenomes-Gn:WBGene00021693, EnsemblGenomes-Tr:Y48G8AR.2, GI:351064523, GOA:Q9N3N6, InterPro:IPR011011, InterPro:IPR013083, InterPro:IPR017455, UniProtKB/TrEMBL:Q9N3N6, WormBase:WBGene00021693, Y48G8AR.2		3.99497	18.3028	1.45734	2.74127	0.00612023	0.0168228
RCEA080650	BX284605	sas-5	CAA98463.2, CELE_F35B12.5, GI:14530450, sas-5, WormBase:WBGene00009385		3.99215	634.229	0.567326	7.03678	1.96735e-12	5.44542e-11
RCEA096889	BX284606	inx-2	CAB54206.2, CELE_F08G12.10, GI:13548338, inx-2, WormBase:WBGene00002124		3.98921	160.708	0.987542	4.03953	5.35587e-05	0.000273597
RCEA014743	BX284602	R05G9.3	CCD73233.1, CELE_R05G9.3, EnsemblGenomes-Gn:WBGene00019905, EnsemblGenomes-Tr:R05G9.3, GI:351064748, GOA:Q966H1, R05G9.3, UniProtKB/TrEMBL:Q966H1, WormBase:WBGene00019905		3.98848	90.1068	0.839598	4.75046	2.02955e-06	1.50891e-05
RCEA094233	BX284606	set-12	CCD67568.1, CELE_K09F5.5, EnsemblGenomes-Gn:WBGene00019584, EnsemblGenomes-Tr:K09F5.5, GI:351059968, GOA:Q21404, InterPro:IPR001214, InterPro:IPR003616, InterPro:IPR006560, set-12, UniProtKB/TrEMBL:Q21404, WormBase:WBGene00019584		3.98743	33.4753	1.30385	3.0582	0.00222674	0.00706867
RCEA090816	BX284606	ceh-63	CCD62377.1, ceh-63, CELE_C02F12.10, EnsemblGenomes-Gn:WBGene00045215, EnsemblGenomes-Tr:C02F12.10, GI:373218682, GOA:A3FPJ2, InterPro:IPR001356, InterPro:IPR009057, InterPro:IPR017970, InterPro:IPR020479, UniProtKB/TrEMBL:A3FPJ2, WormBase:WBGene00045215		3.98347	9.1112	1.63317	2.4391	0.0147239	0.035396
RCEA034360	BX284604	F36H12.2	CDK13437.1, CELE_F36H12.2, EnsemblGenomes-Gn:WBGene00018118, EnsemblGenomes-Tr:F36H12.2b, F36H12.2, GI:563403552, UniProtKB/TrEMBL:V6CLF4, WormBase:WBGene00018118		3.98135	21.1022	1.3307	2.99193	0.0027722	0.00854138
RCEA045103	BX284604	F28D1.2	CAA94596.1, CELE_F28D1.2, EnsemblGenomes-Gn:WBGene00009212, EnsemblGenomes-Tr:F28D1.2, F28D1.2, GI:3876369, GOA:Q19872, UniProtKB/TrEMBL:Q19872, WormBase:WBGene00009212		3.98018	106.018	0.768749	5.17748	2.24909e-07	2.12774e-06
RCEA009095	BX284601	fipr-22	CAB07334.1, CELE_C37A5.2, EnsemblGenomes-Gn:WBGene00007989, EnsemblGenomes-Tr:C37A5.2, fipr-22, GI:3874810, UniProtKB/TrEMBL:O62092, WormBase:WBGene00007989	Hypothetical protein	3.96755	62.2646	0.98498	4.02805	5.62404e-05	0.000284838
RCEA041426	BX284604	mesp-1	CCD64004.1, CELE_C28C12.2, EnsemblGenomes-Gn:WBGene00016178, EnsemblGenomes-Tr:C28C12.2, GI:351049936, mesp-1, UniProtKB/TrEMBL:Q18282, WormBase:WBGene00016178		3.96643	2196.61	0.613209	6.46832	9.90972e-11	1.9826e-09
RCEA032306	BX284604	F15E6.3	CCD69513.1, CELE_F15E6.3, EnsemblGenomes-Gn:WBGene00017484, EnsemblGenomes-Tr:F15E6.3, F15E6.3, GI:351061670, UniProtKB/TrEMBL:G5ECT2, WormBase:WBGene00017484		3.96367	207.74	0.75051	5.2813	1.28273e-07	1.28572e-06
RCEA008613	BX284601	T04D3.1	CAB03285.1, CELE_T04D3.1, EnsemblGenomes-Gn:WBGene00011431, EnsemblGenomes-Tr:T04D3.1, GI:3879433, GOA:O18697, T04D3.1, UniProtKB/TrEMBL:O18697, WormBase:WBGene00011431		3.95515	63.7648	1.37987	2.86632	0.00415276	0.0121052
RCEA012299	BX284602	C16C8.14	C16C8.14, CCD64704.1, CELE_C16C8.14, EnsemblGenomes-Gn:WBGene00015852, EnsemblGenomes-Tr:C16C8.14, GI:351058085, InterPro:IPR000626, InterPro:IPR029071, UniProtKB/TrEMBL:P91053, WormBase:WBGene00015852		3.95403	84.7929	0.946779	4.1763	2.96295e-05	0.000162413
RCEA001666	BX284601	tyr-5	CCD73451.1, CELE_Y44E3B.2, EnsemblGenomes-Gn:WBGene00021553, EnsemblGenomes-Tr:Y44E3B.2, GI:373220529, GOA:O76708, InterPro:IPR002227, InterPro:IPR008922, tyr-5, UniProtKB/TrEMBL:O76708, WormBase:WBGene00021553		3.95148	41.6243	1.19374	3.31017	0.000932409	0.00330251
RCEA003306	BX284601	C06A5.12	C06A5.12, CCD61223.1, CELE_C06A5.12, EnsemblGenomes-Gn:WBGene00044414, EnsemblGenomes-Tr:C06A5.12, GI:351065263, GOA:Q4TT80, UniProtKB/TrEMBL:Q4TT80, WormBase:WBGene00044414		3.94591	25.2713	1.22611	3.21824	0.00128981	0.0043792
RCEA083159	BX284605	F40G12.11	CAB01191.1, CELE_F40G12.11, EnsemblGenomes-Gn:WBGene00009606, EnsemblGenomes-Tr:F40G12.11, F40G12.11, GI:3877031, UniProtKB/TrEMBL:G5EET4, WormBase:WBGene00009606		3.94432	217.369	0.773122	5.10181	3.36417e-07	3.04248e-06
RCEA000074	BX284601	mex-3	CCD71704.1, CELE_F53G12.5, EnsemblGenomes-Gn:WBGene00003229, EnsemblGenomes-Tr:F53G12.5b, GI:373220019, GOA:H2L067, InterPro:IPR004087, InterPro:IPR004088, mex-3, UniProtKB/TrEMBL:H2L067, WormBase:WBGene00003229	Nuclear protein	3.93853	1774.45	0.517909	7.60468	2.85603e-14	1.17074e-12
RCEA001879	BX284601	T12F5.2	CCD69783.1, CELE_T12F5.2, EnsemblGenomes-Gn:WBGene00020467, EnsemblGenomes-Tr:T12F5.2, GI:373219729, GOA:O44759, T12F5.2, UniProtKB/TrEMBL:O44759, WormBase:WBGene00020467		3.93633	30.8859	1.08366	3.63243	0.000280763	0.00116163
RCEA075225	BX284605	rga-3	CCD67874.1, CELE_K09H11.3, EnsemblGenomes-Gn:WBGene00019600, EnsemblGenomes-Tr:K09H11.3, GI:351060238, GOA:O01585, InterPro:IPR000198, InterPro:IPR008936, rga-3, UniProtKB/TrEMBL:O01585, WormBase:WBGene00019600		3.93057	921.22	0.457622	8.58912	8.76372e-18	6.99474e-16
RCEA000045	BX284601	Y48G1C.13	CCD71730.2, CELE_Y48G1C.13, EnsemblGenomes-Gn:WBGene00189949, EnsemblGenomes-Tr:Y48G1C.13, GI:563403572, GOA:E3WIS3, InterPro:IPR002557, UniProtKB/TrEMBL:E3WIS3, WormBase:WBGene00189949, Y48G1C.13	Hypothetical protein	3.92923	50.3522	1.00102	3.9252	8.66564e-05	0.000416973
RCEA074764	BX284605	Y58A7A.3	CCD63022.1, CELE_Y58A7A.3, EnsemblGenomes-Gn:WBGene00021977, EnsemblGenomes-Tr:Y58A7A.3, GI:351021016, InterPro:IPR002867, UniProtKB/TrEMBL:Q966A6, WormBase:WBGene00021977, Y58A7A.3		3.91962	1308.01	0.599235	6.54105	6.10885e-11	1.26931e-09
RCEA082436	BX284605	Y2H9A.6	CCQ25655.1, CELE_Y2H9A.6, EnsemblGenomes-Gn:WBGene00086568, EnsemblGenomes-Tr:Y2H9A.6b, GI:442535368, GOA:L8EC29, UniProtKB/TrEMBL:L8EC29, WormBase:WBGene00086568, Y2H9A.6		3.91699	11.3788	1.60786	2.43616	0.0148442	0.0356285
RCEA013926	BX284602	fut-3	CCD64979.1, CELE_F59E12.13, EnsemblGenomes-Gn:WBGene00006402, EnsemblGenomes-Tr:F59E12.13.1, EnsemblGenomes-Tr:F59E12.13.2, EnsemblGenomes-Tr:F59E12.13.3, fut-3, GI:351050436, GOA:G5EFP5, InterPro:IPR001503, InterPro:IPR031481, UniProtKB/TrEMBL:G5EFP5, WormBase:WBGene00006402		3.91289	460.73	0.610353	6.41087	1.44695e-10	2.79835e-09
RCEA012219	BX284602	F14D2.2	CCD69482.1, CELE_F14D2.2, EnsemblGenomes-Gn:WBGene00017451, EnsemblGenomes-Tr:F14D2.2.1, EnsemblGenomes-Tr:F14D2.2.2, F14D2.2, GI:351061636, InterPro:IPR005020, UniProtKB/TrEMBL:O44809, WormBase:WBGene00017451		3.91205	12.4659	1.48214	2.63947	0.00830357	0.0218146
RCEA013016	BX284602	vab-1	CCD70551.1, CELE_M03A1.1, EnsemblGenomes-Gn:WBGene00006868, EnsemblGenomes-Tr:M03A1.1b, GI:373254361, vab-1, WormBase:WBGene00006868		3.91155	1328.81	0.458828	8.52509	1.52692e-17	1.16922e-15
RCEA087178	BX284605	ztf-20	CAD31836.1, CELE_Y39B6A.46, EnsemblGenomes-Gn:WBGene00012702, EnsemblGenomes-Tr:Y39B6A.46, GI:21038861, GOA:Q8MYM0, InterPro:IPR007087, InterPro:IPR015880, UniProtKB/TrEMBL:Q8MYM0, WormBase:WBGene00012702, ztf-20		3.90548	24.4799	1.26704	3.08238	0.00205355	0.00659243
RCEA019966	BX284602	F15D4.5	CAB02488.2, CELE_F15D4.5, EnsemblGenomes-Gn:WBGene00008862, EnsemblGenomes-Tr:F15D4.5, F15D4.5, GI:38422278, GOA:Q93513, InterPro:IPR001878, UniProtKB/TrEMBL:Q93513, WormBase:WBGene00008862		3.90076	195.295	0.738058	5.28517	1.25589e-07	1.26217e-06
RCEA023870	BX284603	F26A1.1	CCD66793.1, CELE_F26A1.1, EnsemblGenomes-Gn:WBGene00017801, EnsemblGenomes-Tr:F26A1.1, F26A1.1, GI:351058969, UniProtKB/TrEMBL:Q19805, WormBase:WBGene00017801		3.89893	448.132	0.558952	6.97543	3.04945e-12	8.28847e-11
RCEA033827	BX284604	tkr-3	CCD61149.1, CELE_AC7.1, EnsemblGenomes-Gn:WBGene00006428, EnsemblGenomes-Tr:AC7.1a, GI:351065203, GOA:Q58AU0, InterPro:IPR000276, InterPro:IPR000611, InterPro:IPR017452, tkr-3, UniProtKB/TrEMBL:Q58AU0, WormBase:WBGene00006428		3.89856	10.42	1.60635	2.42696	0.015226	0.0364115
RCEA005984	BX284601	T05F1.2	CAB04690.1, CELE_T05F1.2, EnsemblGenomes-Gn:WBGene00011489, EnsemblGenomes-Tr:T05F1.2, GI:3924846, T05F1.2, UniProtKB/TrEMBL:Q9XUR4, WormBase:WBGene00011489		3.8856	928.258	0.686828	5.65731	1.53764e-08	1.91411e-07
RCEA019072	BX284602	F43G6.10	CAA90403.1, CELE_F43G6.10, EnsemblGenomes-Gn:WBGene00009662, EnsemblGenomes-Tr:F43G6.10, F43G6.10, GI:4008360, UniProtKB/TrEMBL:Q9XVX2, WormBase:WBGene00009662		3.87588	62.3554	0.755273	5.13177	2.87033e-07	2.64167e-06
RCEA078420	BX284605	C50F4.6	C50F4.6, CAA94741.1, CELE_C50F4.6, EnsemblGenomes-Gn:WBGene00001910, EnsemblGenomes-Tr:C50F4.6, GI:3875124, UniProtKB/TrEMBL:Q18742, WormBase:WBGene00001910		3.87333	139.613	0.617157	6.27609	3.47195e-10	6.1185e-09
RCEA092331	BX284606	octr-1	CCD83473.1, CELE_F14D12.6, EnsemblGenomes-Gn:WBGene00006411, EnsemblGenomes-Tr:F14D12.6b, GI:351059191, GOA:Q7JP61, InterPro:IPR000276, InterPro:IPR017452, octr-1, UniProtKB/TrEMBL:Q7JP61, WormBase:WBGene00006411		3.86769	22.928	1.22808	3.14937	0.00163624	0.0054022
RCEA083589	BX284605	unc-61	CAD54172.2, CELE_Y50E8A.4, EnsemblGenomes-Gn:WBGene00006795, EnsemblGenomes-Tr:Y50E8A.4a, GI:412977109, GOA:Q8I4C9, InterPro:IPR016491, InterPro:IPR027417, InterPro:IPR030379, unc-61, UniProtKB/TrEMBL:Q8I4C9, WormBase:WBGene00006795		3.86689	598.311	0.63375	6.1016	1.05015e-09	1.68348e-08
RCEA041535	BX284604	C49C8.2	C49C8.2, CCD67642.1, CELE_C49C8.2, EnsemblGenomes-Gn:WBGene00016766, EnsemblGenomes-Tr:C49C8.2, GI:351060016, GOA:Q18706, UniProtKB/TrEMBL:Q18706, WormBase:WBGene00016766		3.86512	14.6822	1.41086	2.73955	0.00615229	0.0168894
RCEA019273	BX284602	Y17G7B.19	CAA19467.3, CELE_Y17G7B.19, EnsemblGenomes-Gn:WBGene00012470, EnsemblGenomes-Tr:Y17G7B.19, GI:169402860, GOA:G5EC62, InterPro:IPR002593, UniProtKB/TrEMBL:G5EC62, WormBase:WBGene00012470, Y17G7B.19		3.85809	16.0357	1.42361	2.71007	0.00672685	0.018218
RCEA004243	BX284601	hlh-2	CAA95837.1, CELE_M05B5.5, GI:3878580, GOA:G5EEG9, hlh-2, InterPro:IPR011598, UniProtKB/TrEMBL:G5EEG9, WormBase:WBGene00001949		3.85217	72.7793	1.02105	3.77276	0.000161454	0.000717389
RCEA077530	BX284605	F45F2.11	CCH63847.1, CELE_F45F2.11, F45F2.11, GI:387910734, UniProtKB/TrEMBL:I2HAE0, WormBase:WBGene00018483		3.84728	516.641	0.482828	7.96822	1.60978e-15	8.14886e-14
RCEA040851	BX284604	sgo-1	CDM63523.1, CELE_C33H5.15, EnsemblGenomes-Gn:WBGene00016381, EnsemblGenomes-Tr:C33H5.15b, GI:583026003, InterPro:IPR011516, sgo-1, UniProtKB/TrEMBL:W6SBE3, WormBase:WBGene00016381		3.84702	310.52	0.560133	6.86805	6.50842e-12	1.64731e-10
RCEA089565	BX284606	meg-3	CCD71642.1, CELE_F52D2.4, EnsemblGenomes-Gn:WBGene00001569, EnsemblGenomes-Tr:F52D2.4.1, EnsemblGenomes-Tr:F52D2.4.2, GI:351063455, GOA:Q9TXM1, meg-3, UniProtKB/TrEMBL:Q9TXM1, WormBase:WBGene00001569		3.84465	205.631	0.941993	4.0814	4.47659e-05	0.000233504
RCEA029226	BX284603	unc-71	CAA21545.1, CELE_Y37D8A.13, EnsemblGenomes-Gn:WBGene00006804, EnsemblGenomes-Tr:Y37D8A.13, GI:3925217, GOA:G5EFD5, InterPro:IPR000742, InterPro:IPR001590, InterPro:IPR001762, InterPro:IPR002870, InterPro:IPR006586, InterPro:IPR013032, InterPro:IPR013111, InterPro:IPR024079, unc-71, UniProtKB/TrEMBL:G5EFD5, WormBase:WBGene00006804	disintegrin and metalloproteinase domain-containing protein 19 (EC 3.4.24.-)	3.83673	895.583	0.441823	8.68385	3.82585e-18	3.2423e-16
RCEA043376	BX284604	zim-1	CAQ48399.1, CELE_T07G12.6, GI:186929249, GOA:B2MZC6, InterPro:IPR007087, InterPro:IPR015880, UniProtKB/TrEMBL:B2MZC6, WormBase:WBGene00011597, zim-1		3.82529	175.548	0.669337	5.71504	1.0968e-08	1.41291e-07
RCEA083849	BX284605	mcm-3	CAB02770.1, CELE_C25D7.6, EnsemblGenomes-Gn:WBGene00003155, EnsemblGenomes-Tr:C25D7.6, GI:3874445, GOA:Q9XVR7, InterPro:IPR001208, InterPro:IPR003593, InterPro:IPR008046, InterPro:IPR012340, InterPro:IPR018525, InterPro:IPR027417, InterPro:IPR027925, InterPro:IPR031327, mcm-3, UniProtKB/TrEMBL:Q9XVR7, WormBase:WBGene00003155		3.82274	1609.88	0.449516	8.50413	1.82963e-17	1.36633e-15
RCEA044156	BX284604	H02I12.5	CAB07219.1, CELE_H02I12.5, EnsemblGenomes-Gn:WBGene00010353, EnsemblGenomes-Tr:H02I12.5, GI:3877983, H02I12.5, UniProtKB/TrEMBL:O45603, WormBase:WBGene00010353		3.82111	1125.38	0.56192	6.8001	1.04548e-11	2.5644e-10
RCEA043385	BX284604	zim-2	CAB05280.2, CELE_T07G12.10, EnsemblGenomes-Gn:WBGene00011600, EnsemblGenomes-Tr:T07G12.10, GI:17645982, GOA:O18067, InterPro:IPR007087, InterPro:IPR015880, UniProtKB/TrEMBL:O18067, WormBase:WBGene00011600, zim-2		3.8103	101.051	0.740821	5.14335	2.69886e-07	2.50537e-06
RCEA005269	BX284601	imp-1	CAI79138.1, CELE_C36B1.12, EnsemblGenomes-Gn:WBGene00007979, EnsemblGenomes-Tr:C36B1.12c.1, EnsemblGenomes-Tr:C36B1.12c.2, GI:62553968, GOA:Q564X0, imp-1, InterPro:IPR006639, InterPro:IPR007369, UniProtKB/TrEMBL:Q564X0, WormBase:WBGene00007979		3.80774	1035.15	0.44064	8.6414	5.55289e-18	4.57734e-16
RCEA017459	BX284602	wee-1.3	CAB16484.1, CELE_Y53C12A.1, EnsemblGenomes-Gn:WBGene00006940, EnsemblGenomes-Tr:Y53C12A.1, GI:3881127, wee-1.3, WormBase:WBGene00006940		3.80431	1071.26	0.603566	6.30306	2.91827e-10	5.25324e-09
RCEA100287	BX284606	csb-1	CAB03135.2, CELE_F53H4.1, csb-1, EnsemblGenomes-Gn:WBGene00000803, EnsemblGenomes-Tr:F53H4.1, GI:30145715, GOA:Q93781, InterPro:IPR000330, InterPro:IPR001650, InterPro:IPR014001, InterPro:IPR027417, UniProtKB/TrEMBL:Q93781, WormBase:WBGene00000803		3.80145	277.733	0.585205	6.49592	8.25266e-11	1.67103e-09
RCEA045789	BX284604	ced-3	CAB61001.2, ced-3, CELE_C48D1.2, EnsemblGenomes-Gn:WBGene00000417, EnsemblGenomes-Tr:C48D1.2a, GI:15718157, WormBase:WBGene00000417		3.80088	448.529	0.508427	7.47577	7.67526e-14	2.90179e-12
RCEA015986	BX284602	perm-1	CAA92688.1, CELE_T01H3.4, EnsemblGenomes-Gn:WBGene00011350, EnsemblGenomes-Tr:T01H3.4, GI:3879267, GOA:Q22090, InterPro:IPR016040, perm-1, UniProtKB/TrEMBL:Q22090, WormBase:WBGene00011350		3.79539	399.291	0.605622	6.26694	3.68217e-10	6.44379e-09
RCEA004082	BX284601	C30F12.3	C30F12.3, CCD66232.1, CELE_C30F12.3, EnsemblGenomes-Gn:WBGene00016262, EnsemblGenomes-Tr:C30F12.3, GI:373254087, GOA:Q95YE0, UniProtKB/TrEMBL:Q95YE0, WormBase:WBGene00016262		3.79053	56.8498	1.00417	3.77481	0.000160129	0.000712129
RCEA030398	BX284604	perm-2	CCD67227.1, CELE_C44B12.1, EnsemblGenomes-Gn:WBGene00016636, EnsemblGenomes-Tr:C44B12.1, GI:351059637, perm-2, UniProtKB/TrEMBL:O44145, WormBase:WBGene00016636		3.78942	5982.52	0.621653	6.09571	1.0895e-09	1.73549e-08
RCEA083788	BX284605	T01C3.3	CAB01659.1, CELE_T01C3.3, EnsemblGenomes-Gn:WBGene00011320, EnsemblGenomes-Tr:T01C3.3, GI:3879246, GOA:Q22055, InterPro:IPR001841, InterPro:IPR013083, InterPro:IPR017907, InterPro:IPR018957, T01C3.3, UniProtKB/TrEMBL:Q22055, WormBase:WBGene00011320		3.78272	939.985	0.570513	6.63039	3.34801e-11	7.3622e-10
RCEA071890	BX284605	ergo-1	CCD62622.1, CELE_R09A1.1, EnsemblGenomes-Gn:WBGene00019971, EnsemblGenomes-Tr:R09A1.1, ergo-1, GI:351020632, GOA:O61931, InterPro:IPR003100, InterPro:IPR003165, InterPro:IPR012337, UniProtKB/Swiss-Prot:O61931, WormBase:WBGene00019971		3.77473	2277.28	0.405236	9.31489	1.2208e-20	1.72111e-18
RCEA012603	BX284602	fbxa-24	CCD64808.1, CELE_F54D10.2, EnsemblGenomes-Gn:WBGene00018803, EnsemblGenomes-Tr:F54D10.2, fbxa-24, GI:351050266, InterPro:IPR002900, UniProtKB/TrEMBL:Q9TZ85, WormBase:WBGene00018803	Hypothetical protein	3.77314	25.6988	1.39428	2.70616	0.00680662	0.0183912
RCEA093487	BX284606	pes-23	CCD64779.1, CELE_F14B8.3, EnsemblGenomes-Gn:WBGene00003987, EnsemblGenomes-Tr:F14B8.3, GI:351050236, GOA:Q19442, InterPro:IPR005828, InterPro:IPR020846, pes-23, UniProtKB/TrEMBL:Q19442, WormBase:WBGene00003987		3.77266	190.322	0.673009	5.60566	2.07468e-08	2.50774e-07
RCEA027234	BX284603	lrg-1	CELE_F55H2.4, lrg-1		3.77245	136.903	0.852982	4.42266	9.74918e-06	6.09475e-05
RCEA042562	BX284604	gln-6	CAB05127.1, CELE_C28D4.3, EnsemblGenomes-Gn:WBGene00001607, EnsemblGenomes-Tr:C28D4.3.1, EnsemblGenomes-Tr:C28D4.3.2, GI:3874586, gln-6, GOA:O02225, InterPro:IPR008146, InterPro:IPR008147, InterPro:IPR014746, InterPro:IPR027302, UniProtKB/TrEMBL:O02225, WormBase:WBGene00001607	Glutamine synthetase (EC 6.3.1.2)	3.77197	6486.52	0.606174	6.22259	4.89e-10	8.38716e-09
RCEA097663	BX284606	W06D11.1	CAA93539.1, CELE_W06D11.1, EnsemblGenomes-Gn:WBGene00012299, EnsemblGenomes-Tr:W06D11.1, GI:3880525, UniProtKB/TrEMBL:G5EGF5, W06D11.1, WormBase:WBGene00012299		3.77111	130.021	1.00042	3.76951	0.000163567	0.000725283
RCEA014448	BX284602	szy-4	CCD66140.1, CELE_C30B5.1, EnsemblGenomes-Gn:WBGene00077732, EnsemblGenomes-Tr:C30B5.1, GI:351058647, GOA:Q18320, szy-4, UniProtKB/TrEMBL:Q18320, WormBase:WBGene00077732		3.77093	258.446	0.727118	5.18613	2.14703e-07	2.04083e-06
RCEA026967	BX284603	cya-1	CAA82372.1, CELE_ZK507.6, cya-1, EnsemblGenomes-Gn:WBGene00000863, EnsemblGenomes-Tr:ZK507.6, GI:3881636, WormBase:WBGene00000863		3.76841	226.115	0.581327	6.48243	9.02553e-11	1.81776e-09
RCEA027743	BX284603	T16G12.4	CAA82967.1, CELE_T16G12.4, EnsemblGenomes-Gn:WBGene00011805, EnsemblGenomes-Tr:T16G12.4, GI:3879898, GOA:Q22527, InterPro:IPR024483, T16G12.4, UniProtKB/TrEMBL:Q22527, WormBase:WBGene00011805		3.76315	168.636	0.559379	6.72736	1.72769e-11	4.00957e-10
RCEA005209	BX284601	egg-6	CAB03182.1, CELE_K07A12.2, egg-6, EnsemblGenomes-Gn:WBGene00010621, EnsemblGenomes-Tr:K07A12.2, GI:3878353, WormBase:WBGene00010621		3.76255	2200.75	0.5287	7.11661	1.10612e-12	3.25354e-11
RCEA017544	BX284602	rnh-1.2	CAA90146.1, CELE_ZK938.7, EnsemblGenomes-Gn:WBGene00014163, EnsemblGenomes-Tr:ZK938.7, GI:3881909, GOA:Q23676, InterPro:IPR002156, InterPro:IPR011021, InterPro:IPR012337, InterPro:IPR014756, rnh-1.2, UniProtKB/TrEMBL:Q23676, WormBase:WBGene00014163		3.75655	209.286	0.739509	5.07979	3.7785e-07	3.36474e-06
RCEA011884	BX284602	C41H7.3	C41H7.3, CCD61997.1, CELE_C41H7.3, GI:351018092, InterPro:IPR005020, UniProtKB/TrEMBL:O17152, WormBase:WBGene00016573		3.75062	701.884	0.558707	6.71304	1.90605e-11	4.37766e-10
RCEA082111	BX284605	F15B9.6	CAB01424.2, CELE_F15B9.6, EnsemblGenomes-Gn:WBGene00008850, EnsemblGenomes-Tr:F15B9.6, F15B9.6, GI:198447244, GOA:Q19481, UniProtKB/TrEMBL:Q19481, WormBase:WBGene00008850		3.7502	218.591	0.539734	6.94824	3.69881e-12	9.86216e-11
RCEA044158	BX284604	cyp-31A2	CAB07222.3, CELE_H02I12.8, cyp-31A2, EnsemblGenomes-Gn:WBGene00010354, EnsemblGenomes-Tr:H02I12.8, GI:54649875, GOA:G5EGT6, InterPro:IPR001128, InterPro:IPR002401, InterPro:IPR017972, UniProtKB/TrEMBL:G5EGT6, WormBase:WBGene00010354		3.74626	451.941	0.55589	6.73921	1.59254e-11	3.71305e-10
RCEA040556	BX284604	plk-3	CCD69395.1, CELE_F55G1.8, EnsemblGenomes-Gn:WBGene00004044, EnsemblGenomes-Tr:F55G1.8.1, EnsemblGenomes-Tr:F55G1.8.2, GI:351061539, plk-3, WormBase:WBGene00004044	Serine/threonine-protein kinase PLK (EC 2.7.1.-)	3.74417	1106.95	0.570677	6.56093	5.34718e-11	1.12187e-09
RCEA029571	BX284603	T05D4.2	CAB03292.1, CELE_T05D4.2, EnsemblGenomes-Gn:WBGene00011475, EnsemblGenomes-Tr:T05D4.2, GI:3879440, GOA:O45748, InterPro:IPR012885, T05D4.2, UniProtKB/TrEMBL:O45748, WormBase:WBGene00011475		3.7385	19.8456	1.07462	3.47892	0.000503444	0.00193785
RCEA074978	BX284605	cyp-14A5	CCD65596.1, CELE_F08F3.7, cyp-14A5, EnsemblGenomes-Gn:WBGene00000373, EnsemblGenomes-Tr:F08F3.7, GI:373254027, GOA:Q27531, InterPro:IPR001128, InterPro:IPR002401, InterPro:IPR017972, UniProtKB/TrEMBL:Q27531, WormBase:WBGene00000373	Cytochrome P450 (EC 1.14.14.1)	3.72387	1247.65	0.488127	7.6289	2.36772e-14	9.86657e-13
RCEA025756	BX284603	clk-2	CCD63593.1, CELE_C07H6.6, clk-2, EnsemblGenomes-Gn:WBGene00000537, EnsemblGenomes-Tr:C07H6.6, GI:351021328, WormBase:WBGene00000537		3.71904	149.725	0.551968	6.73777	1.60831e-11	3.74404e-10
RCEA005125	BX284601	rskn-1	CAN86594.1, CELE_T01H8.1, EnsemblGenomes-Gn:WBGene00011352, EnsemblGenomes-Tr:T01H8.1e, GI:148472892, GOA:G5EE78, InterPro:IPR000719, InterPro:IPR000961, InterPro:IPR002290, InterPro:IPR008271, InterPro:IPR011009, InterPro:IPR016239, InterPro:IPR017441, InterPro:IPR017892, rskn-1, UniProtKB/TrEMBL:G5EE78, WormBase:WBGene00011352		3.71842	803.142	0.492391	7.55176	4.29419e-14	1.70918e-12
RCEA013682	BX284602	EEED8.3	CCD68730.1, CELE_EEED8.3, EEED8.3, EnsemblGenomes-Gn:WBGene00017134, EnsemblGenomes-Tr:EEED8.3, GI:351060983, WormBase:WBGene00017134		3.70729	179.58	0.723754	5.1223	3.01833e-07	2.75949e-06
RCEA082240	BX284605	sun-1	CAB01511.1, CELE_F57B1.2, EnsemblGenomes-Gn:WBGene00006311, EnsemblGenomes-Tr:F57B1.2, GI:3877753, sun-1, WormBase:WBGene00006311		3.70497	330.425	0.517571	7.15838	8.16332e-13	2.46287e-11
RCEA003230	BX284601	cdc-7	CCD66685.1, cdc-7, CELE_C34G6.5, EnsemblGenomes-Gn:WBGene00016421, EnsemblGenomes-Tr:C34G6.5, GI:351058887, GOA:O01493, InterPro:IPR000719, InterPro:IPR008271, InterPro:IPR011009, InterPro:IPR017441, UniProtKB/TrEMBL:O01493, WormBase:WBGene00016421		3.70271	220.691	0.650671	5.6906	1.26591e-08	1.60879e-07
RCEA020715	BX284602	C04H5.7	C04H5.7, CAN99656.1, CELE_C04H5.7, EnsemblGenomes-Gn:WBGene00007315, EnsemblGenomes-Tr:C04H5.7a, GI:148879352, UniProtKB/TrEMBL:A5Z2V2, WormBase:WBGene00007315		3.69856	112.199	1.00974	3.6629	0.00024938	0.00104613
RCEA041036	BX284604	Y42H9B.3	CCD65706.1, CELE_Y42H9B.3, EnsemblGenomes-Gn:WBGene00021541, EnsemblGenomes-Tr:Y42H9B.3, GI:351058281, UniProtKB/TrEMBL:Q9N3X7, WormBase:WBGene00021541, Y42H9B.3		3.69825	231.943	0.682609	5.41782	6.03302e-08	6.4499e-07
RCEA077466	BX284605	vha-18	CCD70812.1, CELE_F52E1.10, EnsemblGenomes-Gn:WBGene00018698, EnsemblGenomes-Tr:F52E1.10, GI:373254406, vha-18, WormBase:WBGene00018698	Vacuolar ATP synthase subunit H (EC 3.6.3.14)	3.69706	200.254	0.791537	4.67074	3.00116e-06	2.14358e-05
RCEA006758	BX284601	B0511.19	B0511.19, CELE_B0511.19, CTQ86345.1, GI:919006362, UniProtKB/TrEMBL:A0A0K3AU60, WormBase:WBGene00255714		3.69622	167.031	0.67199	5.50042	3.78898e-08	4.26225e-07
RCEA085631	BX284605	Y102A5C.6	CELE_Y102A5C.6, Y102A5C.6		3.69071	308.174	0.634948	5.81262	6.15013e-09	8.31314e-08
RCEA075058	BX284605	syp-2	CCD65128.1, CELE_C24G6.1, EnsemblGenomes-Gn:WBGene00006376, EnsemblGenomes-Tr:C24G6.1, GI:351050524, GOA:O76388, syp-2, UniProtKB/TrEMBL:O76388, WormBase:WBGene00006376		3.68924	145.42	0.690606	5.34202	9.19147e-08	9.44505e-07
RCEA044315	BX284604	srgp-1	CAA97790.1, CELE_F12F6.5, GI:3875798, GOA:Q19370, InterPro:IPR000198, InterPro:IPR001060, InterPro:IPR008936, InterPro:IPR031160, srgp-1, UniProtKB/TrEMBL:Q19370, WormBase:WBGene00006406	Rho-GTPase activating protein	3.68898	1971.3	0.456888	8.07416	6.79448e-16	3.70017e-14
RCEA028467	BX284603	mcm-10	CAB57900.1, CELE_Y47D3A.28, EnsemblGenomes-Gn:WBGene00012935, EnsemblGenomes-Tr:Y47D3A.28, GI:6018412, GOA:Q9U2C2, InterPro:IPR015408, InterPro:IPR015411, mcm-10, UniProtKB/TrEMBL:Q9U2C2, WormBase:WBGene00012935		3.68795	166.078	0.648746	5.68474	1.3101e-08	1.65656e-07
RCEA041637	BX284604	F20C5.6	CAA92300.1, CELE_F20C5.6, EnsemblGenomes-Gn:WBGene00008971, EnsemblGenomes-Tr:F20C5.6, F20C5.6, GI:3876123, GOA:G5EFF2, UniProtKB/TrEMBL:G5EFF2, WormBase:WBGene00008971		3.68136	47.7998	0.98155	3.75056	0.000176439	0.000775294
RCEA013353	BX284602	F59A6.12	CCD70471.1, CELE_F59A6.12, EnsemblGenomes-Gn:WBGene00044665, EnsemblGenomes-Tr:F59A6.12, F59A6.12, GI:351062502, UniProtKB/TrEMBL:Q2V4S7, WormBase:WBGene00044665		3.67621	74.893	1.05657	3.47939	0.000502554	0.00193542
RCEA044970	BX284604	Y39C12A.2	CELE_Y39C12A.2, Y39C12A.2		3.67064	28.3829	1.05623	3.47521	0.000510447	0.00196131
RCEA000908	BX284601	Y51F10.2	CCD73473.1, CELE_Y51F10.2, GI:373220546, GOA:Q8WTJ8, InterPro:IPR001841, InterPro:IPR013083, InterPro:IPR017907, UniProtKB/TrEMBL:Q8WTJ8, WormBase:WBGene00021763, Y51F10.2		3.66463	1925.23	0.550942	6.65156	2.89996e-11	6.47129e-10
RCEA024534	BX284603	Y37B11A.3	CCD61514.2, CELE_Y37B11A.3, EnsemblGenomes-Gn:WBGene00021345, EnsemblGenomes-Tr:Y37B11A.3, GI:919007408, GOA:Q9BKQ2, InterPro:IPR018108, InterPro:IPR023395, UniProtKB/TrEMBL:Q9BKQ2, WormBase:WBGene00021345, Y37B11A.3		3.66382	17.3244	1.47961	2.47621	0.0132785	0.032416
RCEA028252	BX284603	C44B9.3	C44B9.3, CAA97780.1, CELE_C44B9.3, EnsemblGenomes-Gn:WBGene00008080, EnsemblGenomes-Tr:C44B9.3, GI:3874929, GOA:Q18604, UniProtKB/TrEMBL:Q18604, WormBase:WBGene00008080		3.66342	187.335	0.503965	7.2692	3.61615e-13	1.16559e-11
RCEA023813	BX284603	B0393.6	B0393.6, CAA86059.2, CELE_B0393.6, EnsemblGenomes-Gn:WBGene00007171, EnsemblGenomes-Tr:B0393.6, GI:31043679, GOA:Q17495, InterPro:IPR001841, InterPro:IPR013083, InterPro:IPR017907, UniProtKB/TrEMBL:Q17495, WormBase:WBGene00007171		3.66115	192.695	0.654408	5.5946	2.2113e-08	2.65585e-07
RCEA000549	BX284601	Y48G8AL.10	CDK13486.1, CELE_Y48G8AL.10, GI:563403843, GOA:V6CKC3, InterPro:IPR007087, InterPro:IPR013087, InterPro:IPR015880, UniProtKB/TrEMBL:V6CKC3, WormBase:WBGene00021689, Y48G8AL.10	Zinc finger protein	3.65433	162.061	0.54529	6.70162	2.06118e-11	4.71105e-10
RCEA040049	BX284604	klp-18	CCD83549.1, CELE_C06G3.2, GI:351021140, GOA:G5EBX0, InterPro:IPR001752, InterPro:IPR027417, InterPro:IPR027640, klp-18, UniProtKB/TrEMBL:G5EBX0, WormBase:WBGene00002228		3.64938	1563.35	0.456064	8.00189	1.22519e-15	6.3731e-14
RCEA080194	BX284605	dvc-1	CAA98538.1, CELE_T19B10.6, dvc-1, EnsemblGenomes-Gn:WBGene00011834, EnsemblGenomes-Tr:T19B10.6.1, EnsemblGenomes-Tr:T19B10.6.2, EnsemblGenomes-Tr:T19B10.6.3, GI:3879914, WormBase:WBGene00011834		3.64162	529.939	0.52683	6.91232	4.76775e-12	1.24002e-10
RCEA083760	BX284605	hil-1	CAB01632.1, CELE_C30G7.1, EnsemblGenomes-Gn:WBGene00001852, EnsemblGenomes-Tr:C30G7.1, GI:3874541, hil-1, WormBase:WBGene00001852		3.63717	121.269	0.599657	6.06542	1.31609e-09	2.05307e-08
RCEA084591	BX284605	F54B8.4	CCG28143.1, CELE_F54B8.4, F54B8.4, GI:379657186, GOA:H9G342, InterPro:IPR024130, UniProtKB/TrEMBL:H9G342, WormBase:WBGene00010019		3.63359	276.071	0.526402	6.90269	5.10264e-12	1.3203e-10
RCEA079471	BX284605	aqp-6	aqp-6, CCF23336.1, CELE_C32C4.2, GI:371570822, GOA:H2FLH4, InterPro:IPR000425, InterPro:IPR022357, InterPro:IPR023271, UniProtKB/TrEMBL:H2FLH4, WormBase:WBGene00000174	Aquaporin	3.62944	24.2993	1.0676	3.39961	0.000674823	0.00250177
RCEA098167	BX284606	R03G8.6	CAA93680.1, CELE_R03G8.6, EnsemblGenomes-Gn:WBGene00011000, EnsemblGenomes-Tr:R03G8.6, GI:3878809, GOA:Q9XVV9, InterPro:IPR001930, InterPro:IPR014782, InterPro:IPR024571, R03G8.6, UniProtKB/TrEMBL:Q9XVV9, WormBase:WBGene00011000		3.62214	157.451	0.939022	3.85735	0.000114621	0.000532981
RCEA001494	BX284601	parp-1	CCD73512.1, CELE_Y71F9AL.18, EnsemblGenomes-Gn:WBGene00004049, EnsemblGenomes-Tr:Y71F9AL.18, GI:351059483, parp-1, WormBase:WBGene00004049		3.61997	898.125	0.509551	7.10424	1.20988e-12	3.51658e-11
RCEA003959	BX284601	pqn-20	CCD66919.1, CELE_C37A2.2, EnsemblGenomes-Gn:WBGene00004110, EnsemblGenomes-Tr:C37A2.2, GI:351059063, pqn-20, UniProtKB/TrEMBL:O01505, WormBase:WBGene00004110		3.61715	811.234	0.48735	7.42208	1.15294e-13	4.17078e-12
RCEA004810	BX284601	43922	apr-1, CAB00048.1, CELE_K04G2.8, EnsemblGenomes-Gn:WBGene00000156, EnsemblGenomes-Tr:K04G2.8b, GI:3878270, WormBase:WBGene00000156		3.61416	766.013	0.544185	6.64141	3.10687e-11	6.89222e-10
RCEA071282	BX284605	arid-1	arid-1, CELE_Y108G3AL.7, CTQ86703.1, GI:919008996, GOA:A0A0K3AXH1, UniProtKB/TrEMBL:A0A0K3AXH1, WormBase:WBGene00044689	AT-rich interactive domain-containing protein 4A	3.61358	590.814	0.507803	7.11611	1.11017e-12	3.25815e-11
RCEA044416	BX284604	inx-8	CAA92633.2, CELE_ZK792.2, EnsemblGenomes-Gn:WBGene00002130, EnsemblGenomes-Tr:ZK792.2.1, EnsemblGenomes-Tr:ZK792.2.2, EnsemblGenomes-Tr:ZK792.2.3, GI:14530705, inx-8, WormBase:WBGene00002130	Gap junction-forming innexin protein	3.59902	818.552	0.571716	6.29512	3.07172e-10	5.501e-09
RCEA002305	BX284601	eri-7	CCD64256.1, CELE_C41D11.7, EnsemblGenomes-Gn:WBGene00016566, EnsemblGenomes-Tr:C41D11.7, eri-7, GI:373253976, GOA:O01976, InterPro:IPR003593, InterPro:IPR014001, InterPro:IPR027417, UniProtKB/TrEMBL:O01976, WormBase:WBGene00016566		3.59676	77.2923	0.659462	5.45408	4.92275e-08	5.38114e-07
RCEA023731	BX284603	T04A8.8	CAA84734.1, CELE_T04A8.8, EnsemblGenomes-Gn:WBGene00011410, EnsemblGenomes-Tr:T04A8.8, GI:3879349, GOA:Q22144, InterPro:IPR022617, InterPro:IPR029071, T04A8.8, UniProtKB/TrEMBL:Q22144, WormBase:WBGene00011410		3.59446	976.972	0.484981	7.41155	1.2483e-13	4.46221e-12
RCEA072191	BX284605	oac-32	CELE_F52F10.4, CTQ86813.1, GI:919009176, GOA:A0A0K3AXT9, oac-32, UniProtKB/TrEMBL:A0A0K3AXT9, WormBase:WBGene00018708	putative acyltransferases	3.59144	118.223	0.938912	3.82511	0.000130716	0.000597893
RCEA003075	BX284601	F46F11.8	CCD71330.1, CELE_F46F11.8, EnsemblGenomes-Gn:WBGene00018511, EnsemblGenomes-Tr:F46F11.8, F46F11.8, GI:373254603, InterPro:IPR015880, UniProtKB/TrEMBL:P91308, WormBase:WBGene00018511		3.5889	490.644	0.470665	7.62517	2.43709e-14	1.00999e-12
RCEA015280	BX284602	him-14	CCD73725.1, CELE_ZK1127.11, EnsemblGenomes-Gn:WBGene00001872, EnsemblGenomes-Tr:ZK1127.11, GI:373220460, him-14, WormBase:WBGene00001872		3.588	172.467	0.61058	5.87638	4.19343e-09	5.85722e-08
RCEA014208	BX284602	vrk-1	CCD61237.1, CELE_F28B12.3, EnsemblGenomes-Gn:WBGene00017895, EnsemblGenomes-Tr:F28B12.3.1, EnsemblGenomes-Tr:F28B12.3.2, GI:351065280, vrk-1, WormBase:WBGene00017895		3.58707	648.683	0.459342	7.80914	5.7578e-15	2.64806e-13
RCEA024490	BX284603	wrm-1	CCD61515.1, CELE_B0336.1, EnsemblGenomes-Gn:WBGene00006943, EnsemblGenomes-Tr:B0336.1, GI:351065550, WormBase:WBGene00006943, wrm-1		3.58493	338.123	0.506135	7.08296	1.41109e-12	4.00873e-11
RCEA074800	BX284605	F14F9.4	CCD62732.1, CELE_F14F9.4, EnsemblGenomes-Gn:WBGene00017467, EnsemblGenomes-Tr:F14F9.4, F14F9.4, GI:351020759, InterPro:IPR002867, UniProtKB/TrEMBL:Q9GUC8, WormBase:WBGene00017467		3.58101	725.431	0.658969	5.43426	5.50234e-08	5.92877e-07
RCEA070898	BX284604	gln-5	CAB02317.1, CELE_F26D10.10, EnsemblGenomes-Gn:WBGene00001606, EnsemblGenomes-Tr:F26D10.10, GI:3924748, gln-5, GOA:Q9XVU2, InterPro:IPR008146, InterPro:IPR008147, InterPro:IPR014746, InterPro:IPR027302, UniProtKB/TrEMBL:Q9XVU2, WormBase:WBGene00001606	Glutamine synthetase (EC 6.3.1.2)	3.57846	2122.72	0.525732	6.80664	9.9906e-12	2.45453e-10
RCEA011560	BX284602	F33H12.7	CCD68473.1, CELE_F33H12.7, EnsemblGenomes-Gn:WBGene00045457, EnsemblGenomes-Tr:F33H12.7, F33H12.7, GI:351060732, UniProtKB/TrEMBL:A7DT42, WormBase:WBGene00045457		3.57837	294.151	0.542179	6.59997	4.11251e-11	8.86245e-10
RCEA097324	BX284606	F54F7.3	CAA91756.1, CELE_F54F7.3, EnsemblGenomes-Gn:WBGene00010065, EnsemblGenomes-Tr:F54F7.3, F54F7.3, GI:3877582, UniProtKB/TrEMBL:Q20790, WormBase:WBGene00010065		3.57508	512.138	0.79378	4.50387	6.67272e-06	4.36884e-05
RCEA024541	BX284603	polq-1	CCD73325.1, CELE_W03A3.2, EnsemblGenomes-Gn:WBGene00020964, EnsemblGenomes-Tr:W03A3.2, GI:373220425, polq-1, WormBase:WBGene00020964		3.57346	194.806	0.703409	5.0802	3.77037e-07	3.35971e-06
RCEA003716	BX284601	cdc-25.1	CCD68116.1, cdc-25.1, CELE_K06A5.7, EnsemblGenomes-Gn:WBGene00000386, EnsemblGenomes-Tr:K06A5.7.1, EnsemblGenomes-Tr:K06A5.7.2, GI:351060449, WormBase:WBGene00000386	M-phase inducer phosphatase 1 (EC 3.1.3.48)	3.56934	2392.27	0.511358	6.98011	2.9494e-12	8.031e-11
RCEA026340	BX284603	F10E9.7	CCD69135.1, CELE_F10E9.7, EnsemblGenomes-Gn:WBGene00017358, EnsemblGenomes-Tr:F10E9.7.1, EnsemblGenomes-Tr:F10E9.7.2, F10E9.7, GI:351061356, WormBase:WBGene00017358		3.56891	260.265	0.689762	5.17411	2.28997e-07	2.15901e-06
RCEA040550	BX284604	F55G1.7	CCD69403.1, CELE_F55G1.7, F55G1.7, GI:351061547, UniProtKB/TrEMBL:Q20844, WormBase:WBGene00018903		3.56708	35.8639	1.1965	2.98127	0.00287052	0.00880117
RCEA080198	BX284605	ima-1	CAA98540.1, CELE_T19B10.7, EnsemblGenomes-Gn:WBGene00002072, EnsemblGenomes-Tr:T19B10.7.1, EnsemblGenomes-Tr:T19B10.7.2, GI:3879916, ima-1, WormBase:WBGene00002072		3.5641	511.868	0.614628	5.79878	6.67985e-09	8.95694e-08
RCEA022392	BX284603	H14E04.3	CCD72185.1, CELE_H14E04.3, EnsemblGenomes-Gn:WBGene00019200, EnsemblGenomes-Tr:H14E04.3, GI:351063932, GOA:Q9TYP4, H14E04.3, UniProtKB/TrEMBL:Q9TYP4, WormBase:WBGene00019200		3.56132	50.5544	0.772361	4.61095	4.00837e-06	2.77878e-05
RCEA012383	BX284602	W10G11.2	CCD73663.1, CELE_W10G11.2, EnsemblGenomes-Gn:WBGene00021135, EnsemblGenomes-Tr:W10G11.2, GI:351059450, InterPro:IPR002542, InterPro:IPR016638, UniProtKB/TrEMBL:O44921, W10G11.2, WormBase:WBGene00021135		3.55938	59.6323	0.696296	5.11188	3.18964e-07	2.89831e-06
RCEA008976	BX284601	Y71A12B.19	CELE_Y71A12B.19, Y71A12B.19		3.55891	16.5431	1.32826	2.67937	0.00737602	0.0196655
RCEA023829	BX284603	pal-1	CAA86322.2, CELE_C38D4.6, GI:14530354, pal-1, WormBase:WBGene00003912		3.55737	497.31	0.5138	6.92365	4.40163e-12	1.16081e-10
RCEA079914	BX284605	C45B11.2	C45B11.2, CAA98430.2, CELE_C45B11.2, EnsemblGenomes-Gn:WBGene00008105, EnsemblGenomes-Tr:C45B11.2, GI:145292045, UniProtKB/TrEMBL:Q18638, WormBase:WBGene00008105		3.55427	24.0399	1.21201	2.93253	0.00336209	0.0100669
RCEA041520	BX284604	dgk-4	CCD67663.1, CELE_F42A9.1, dgk-4, EnsemblGenomes-Gn:WBGene00006483, EnsemblGenomes-Tr:F42A9.1a, GI:351060039, GOA:H2KZC9, InterPro:IPR000756, InterPro:IPR001206, InterPro:IPR001660, InterPro:IPR002219, InterPro:IPR013761, InterPro:IPR016064, UniProtKB/TrEMBL:H2KZC9, WormBase:WBGene00006483		3.55145	925.462	0.570049	6.23008	4.66203e-10	8.01901e-09
RCEA083756	BX284605	C30G7.4	C30G7.4, CAI79142.2, CELE_C30G7.4, EnsemblGenomes-Gn:WBGene00044178, EnsemblGenomes-Tr:C30G7.4.1, EnsemblGenomes-Tr:C30G7.4.2, GI:148472888, GOA:Q564Y2, UniProtKB/TrEMBL:Q564Y2, WormBase:WBGene00044178		3.55091	85.9595	0.919435	3.86206	0.000112437	0.000523491
RCEA078064	BX284605	T27E4.1	CCD65661.1, CELE_T27E4.1, EnsemblGenomes-Gn:WBGene00020861, EnsemblGenomes-Tr:T27E4.1, GI:351058243, GOA:Q23056, InterPro:IPR000008, T27E4.1, UniProtKB/TrEMBL:Q23056, WormBase:WBGene00020861		3.5478	17.108	1.53512	2.31108	0.0208283	0.0473329
RCEA002274	BX284601	ZK973.1	CCD73563.1, CELE_ZK973.1, EnsemblGenomes-Gn:WBGene00022830, EnsemblGenomes-Tr:ZK973.1, GI:351064871, GOA:Q9N4L5, InterPro:IPR003029, InterPro:IPR003583, InterPro:IPR006641, InterPro:IPR010994, InterPro:IPR012337, InterPro:IPR012340, InterPro:IPR018974, InterPro:IPR022967, InterPro:IPR023097, InterPro:IPR023319, InterPro:IPR023323, InterPro:IPR032639, UniProtKB/TrEMBL:Q9N4L5, WormBase:WBGene000228…	Transcription accessory protein (S1 RNA binding domain)	3.54171	1129.11	0.46836	7.56193	3.97129e-14	1.59752e-12
RCEA074138	BX284605	irg-2	CCD67689.1, CELE_C49G7.5, EnsemblGenomes-Gn:WBGene00016783, EnsemblGenomes-Tr:C49G7.5, GI:351060066, GOA:O16224, irg-2, UniProtKB/TrEMBL:O16224, WormBase:WBGene00016783		3.54011	133.873	0.706358	5.01179	5.39271e-07	4.63e-06
RCEA090748	BX284606	vit-4	CCD71958.1, CELE_F59D8.2, GI:351063736, vit-4, WormBase:WBGene00006928	Vitellogenin	3.53965	4633.25	0.98824	3.58177	0.000341276	0.00138354
RCEA025140	BX284603	C13B9.2	C13B9.2, CCD64381.1, CELE_C13B9.2, EnsemblGenomes-Gn:WBGene00015733, EnsemblGenomes-Tr:C13B9.2, GI:351050217, WormBase:WBGene00015733	Glycerate dehydrogenase (EC 1.1.1.29) / Hydroxypyruvate reductase (EC 1.1.1.81)	3.5391	143.758	0.791792	4.46974	7.83143e-06	5.01432e-05
RCEA027639	BX284603	K03H1.13	CAL22705.2, CELE_K03H1.13, EnsemblGenomes-Gn:WBGene00044903, EnsemblGenomes-Tr:K03H1.13a, GI:269993263, GOA:Q0PDK5, InterPro:IPR012887, K03H1.13, UniProtKB/TrEMBL:Q0PDK5, WormBase:WBGene00044903		3.53657	198.489	0.673923	5.24773	1.53981e-07	1.51718e-06
RCEA019699	BX284602	Y46G5A.7	CAB60352.2, CELE_Y46G5A.7, EnsemblGenomes-Gn:WBGene00012899, EnsemblGenomes-Tr:Y46G5A.7, GI:62551005, InterPro:IPR001810, UniProtKB/TrEMBL:Q9U2F9, WormBase:WBGene00012899, Y46G5A.7		3.53575	16.5238	1.27679	2.76925	0.00561862	0.0156349
RCEA075590	BX284605	W06H8.2	CCD72164.1, CELE_W06H8.2, EnsemblGenomes-Gn:WBGene00021066, EnsemblGenomes-Tr:W06H8.2, GI:373254502, GOA:Q9N5C0, InterPro:IPR001155, InterPro:IPR013785, UniProtKB/TrEMBL:Q9N5C0, W06H8.2, WormBase:WBGene00021066	NADH-dependent flavin oxidoreductase (EC 1.-.-.-)	3.5342	43.7127	0.838295	4.21594	2.48739e-05	0.000139178
RCEA012833	BX284602	fbxc-44	CCD62425.1, CELE_C16A11.6, EnsemblGenomes-Gn:WBGene00015819, EnsemblGenomes-Tr:C16A11.6, fbxc-44, GI:351020434, UniProtKB/TrEMBL:A3KFE6, WormBase:WBGene00015819		3.53288	285.167	0.632032	5.58972	2.27431e-08	2.72069e-07
RCEA084540	BX284605	F57A10.4	CAB09421.1, CELE_F57A10.4, EnsemblGenomes-Gn:WBGene00010185, EnsemblGenomes-Tr:F57A10.4, F57A10.4, GI:3877817, GOA:O17897, UniProtKB/TrEMBL:O17897, WormBase:WBGene00010185		3.52826	43.1987	0.900757	3.91699	8.96605e-05	0.000429238
RCEA008617	BX284601	T04D3.8	CAC42332.1, CELE_T04D3.8, EnsemblGenomes-Gn:WBGene00011435, EnsemblGenomes-Tr:T04D3.8, GI:14530552, T04D3.8, UniProtKB/TrEMBL:Q95ZQ2, WormBase:WBGene00011435		3.52643	41.4335	0.961342	3.66823	0.000244233	0.00102891
RCEA025121	BX284603	ddo-3	CCD69778.1, CELE_F20H11.5, ddo-3, EnsemblGenomes-Gn:WBGene00017648, EnsemblGenomes-Tr:F20H11.5, GI:351061904, WormBase:WBGene00017648		3.52461	618.161	0.528576	6.66812	2.59106e-11	5.83375e-10
RCEA003649	BX284601	ZC308.4	CCD72662.1, CELE_ZC308.4, EnsemblGenomes-Gn:WBGene00022586, EnsemblGenomes-Tr:ZC308.4a, GI:351064307, UniProtKB/TrEMBL:H2L0E4, WormBase:WBGene00022586, ZC308.4		3.51443	184.816	0.65129	5.39611	6.81014e-08	7.21137e-07
RCEA002170	BX284601	hop-1	CCD65145.1, CELE_C18E3.8, EnsemblGenomes-Gn:WBGene00001985, EnsemblGenomes-Tr:C18E3.8, GI:351050542, hop-1, WormBase:WBGene00001985		3.50777	156.09	0.740101	4.73958	2.14159e-06	1.58052e-05
RCEA016529	BX284602	aptf-3	aptf-3, CAA92668.1, CELE_F28C6.2, EnsemblGenomes-Gn:WBGene00009203, EnsemblGenomes-Tr:F28C6.2, GI:3876351, GOA:Q19862, InterPro:IPR004979, InterPro:IPR013854, UniProtKB/TrEMBL:Q19862, WormBase:WBGene00009203		3.50641	117.044	0.828505	4.23221	2.31409e-05	0.000130839
RCEA004084	BX284601	C30F12.4	C30F12.4, CCD66233.1, CELE_C30F12.4, EnsemblGenomes-Gn:WBGene00016263, EnsemblGenomes-Tr:C30F12.4, GI:373254088, UniProtKB/TrEMBL:Q95YD9, WormBase:WBGene00016263		3.50544	389.259	0.482387	7.26688	3.67898e-13	1.18331e-11
RCEA003490	BX284601	pigv-1	CCD71986.1, CELE_T09B4.1, EnsemblGenomes-Gn:WBGene00020375, EnsemblGenomes-Tr:T09B4.1.1, EnsemblGenomes-Tr:T09B4.1.2, GI:351063762, GOA:O02164, InterPro:IPR007315, pigv-1, UniProtKB/Swiss-Prot:O02164, WormBase:WBGene00020375		3.5036	1764.25	0.428697	8.17268	3.01623e-16	1.77042e-14
RCEA011132	BX284602	F52C6.3	CCD67517.1, CELE_F52C6.3, EnsemblGenomes-Gn:WBGene00018660, EnsemblGenomes-Tr:F52C6.3, F52C6.3, GI:351059927, GOA:O44820, InterPro:IPR000626, InterPro:IPR029071, UniProtKB/TrEMBL:O44820, WormBase:WBGene00018660		3.5034	17.4502	1.29938	2.69621	0.00701325	0.0188684
RCEA010301	BX284602	fbxc-51	CCD70093.1, CELE_Y46B2A.1, EnsemblGenomes-Gn:WBGene00021576, EnsemblGenomes-Tr:Y46B2A.1, fbxc-51, GI:351062178, InterPro:IPR021942, UniProtKB/TrEMBL:Q9N4X2, WormBase:WBGene00021576		3.50227	24.9646	1.19597	2.92839	0.00340727	0.010186
RCEA016712	BX284602	F07H5.10	CAA92656.2, CELE_F07H5.10, EnsemblGenomes-Gn:WBGene00008561, EnsemblGenomes-Tr:F07H5.10, F07H5.10, GI:15718135, InterPro:IPR013961, UniProtKB/TrEMBL:Q19174, WormBase:WBGene00008561		3.50161	343.137	0.510496	6.85924	6.92258e-12	1.74627e-10
RCEA076509	BX284605	C13F10.6	C13F10.6, CCD63116.1, CELE_C13F10.6, EnsemblGenomes-Gn:WBGene00015745, EnsemblGenomes-Tr:C13F10.6, GI:351021104, UniProtKB/TrEMBL:O01487, WormBase:WBGene00015745		3.49977	385.305	0.598679	5.84582	5.04085e-09	6.94441e-08
RCEA084393	BX284605	fbxa-153	CAB03799.2, CELE_B0391.5, EnsemblGenomes-Gn:WBGene00007162, EnsemblGenomes-Tr:B0391.5, fbxa-153, GI:7160683, InterPro:IPR001810, InterPro:IPR002900, UniProtKB/TrEMBL:O62012, WormBase:WBGene00007162		3.49317	35.7243	0.890538	3.92254	8.76217e-05	0.000420813
RCEA066325	BX284604	Y65A5A.2	CBJ25113.1, CELE_Y65A5A.2, GI:285310548, GOA:D3KFX0, UniProtKB/TrEMBL:D3KFX0, WormBase:WBGene00013419, Y65A5A.2		3.48703	259.229	0.50429	6.91474	4.68717e-12	1.22329e-10
RCEA021576	BX284603	T24C4.5	CCD69959.1, CELE_T24C4.5, EnsemblGenomes-Gn:WBGene00020761, EnsemblGenomes-Tr:T24C4.5, GI:351062076, GOA:Q9TZ34, InterPro:IPR002755, InterPro:IPR014052, T24C4.5, UniProtKB/TrEMBL:Q9TZ34, WormBase:WBGene00020761		3.48159	93.8616	0.785183	4.43412	9.24508e-06	5.82504e-05
RCEA006268	BX284601	har-2	CAD01083.1, CELE_T24D1.5, EnsemblGenomes-Gn:WBGene00011988, EnsemblGenomes-Tr:T24D1.5.1, EnsemblGenomes-Tr:T24D1.5.2, GI:16332352, GOA:Q8WQC5, har-2, InterPro:IPR001841, InterPro:IPR013083, UniProtKB/TrEMBL:Q8WQC5, WormBase:WBGene00011988		3.48037	161.003	0.639661	5.44097	5.29923e-08	5.74687e-07
RCEA023526	BX284603	C28A5.1	C28A5.1, CAA83599.1, CELE_C28A5.1, EnsemblGenomes-Gn:WBGene00007788, EnsemblGenomes-Tr:C28A5.1, GI:3874516, UniProtKB/TrEMBL:Q18271, WormBase:WBGene00007788		3.47102	161.497	0.703181	4.93618	7.96692e-07	6.54937e-06
RCEA025401	BX284603	col-8	CCD63397.1, CELE_F11H8.3, col-8, EnsemblGenomes-Gn:WBGene00000597, EnsemblGenomes-Tr:F11H8.3, GI:373218822, WormBase:WBGene00000597		3.47082	802.947	0.811417	4.27747	1.89026e-05	0.000109967
RCEA074134	BX284605	C49G7.10	C49G7.10, CCD67695.1, CELE_C49G7.10, EnsemblGenomes-Gn:WBGene00016788, EnsemblGenomes-Tr:C49G7.10, GI:351060072, GOA:O16222, UniProtKB/TrEMBL:O16222, WormBase:WBGene00016788		3.46819	353.512	0.681116	5.09193	3.54442e-07	3.18428e-06
RCEA011524	BX284602	gbas-1	CCD70880.1, CELE_F59H5.1, gbas-1, GI:351062838, GOA:Q9TZI4, InterPro:IPR006570, UniProtKB/TrEMBL:Q9TZI4, WormBase:WBGene00019130		3.46522	487.548	0.417975	8.29048	1.12789e-16	7.2627e-15
RCEA010752	BX284602	Y51H7C.3	CCD71789.1, CELE_Y51H7C.3, EnsemblGenomes-Gn:WBGene00021781, EnsemblGenomes-Tr:Y51H7C.3, GI:351063578, UniProtKB/TrEMBL:Q9N3I5, WormBase:WBGene00021781, Y51H7C.3		3.46422	138.006	0.609124	5.68722	1.29127e-08	1.63687e-07
RCEA083944	BX284605	K08F9.4	CAB03189.1, CELE_K08F9.4, EnsemblGenomes-Gn:WBGene00010687, EnsemblGenomes-Tr:K08F9.4, GI:3878429, K08F9.4, UniProtKB/TrEMBL:G5EDM0, WormBase:WBGene00010687		3.46203	160.367	0.69249	4.99938	5.7514e-07	4.91279e-06
RCEA024980	BX284603	nfx-1	CCD63227.1, CELE_C16A3.7, EnsemblGenomes-Gn:WBGene00007048, EnsemblGenomes-Tr:C16A3.7, GI:351047547, nfx-1, WormBase:WBGene00007048		3.46062	1750.62	0.438941	7.88402	3.17008e-15	1.52295e-13
RCEA090205	BX284606	vang-1	CCD61852.1, CELE_B0410.2, EnsemblGenomes-Gn:WBGene00015171, EnsemblGenomes-Tr:B0410.2a, GI:373218600, GOA:H2KY90, InterPro:IPR009539, UniProtKB/TrEMBL:H2KY90, vang-1, WormBase:WBGene00015171		3.45952	53.3066	0.982751	3.52025	0.000431147	0.00169725
RCEA100315	BX284606	F31B9.3	CAB04222.2, CELE_F31B9.3, EnsemblGenomes-Gn:WBGene00009280, EnsemblGenomes-Tr:F31B9.3, F31B9.3, GI:211970488, UniProtKB/TrEMBL:O62188, WormBase:WBGene00009280		3.45503	29.5618	1.14524	3.01686	0.00255408	0.00796205
RCEA018856	BX284602	F54D5.9	CAA91335.1, CELE_F54D5.9, EnsemblGenomes-Gn:WBGene00010053, EnsemblGenomes-Tr:F54D5.9, F54D5.9, GI:3877514, GOA:Q20775, InterPro:IPR001810, UniProtKB/TrEMBL:Q20775, WormBase:WBGene00010053		3.45149	833.343	0.41493	8.31824	8.92778e-17	5.90682e-15
RCEA016184	BX284602	pch-2	CAA88312.1, CELE_F10B5.5, EnsemblGenomes-Gn:WBGene00008641, EnsemblGenomes-Tr:F10B5.5, GI:3875713, pch-2, WormBase:WBGene00008641	Pachytene checkpoint protein 2	3.45108	295.702	0.58023	5.94778	2.71803e-09	3.93488e-08
RCEA044822	BX284604	lex-1	CAA92596.2, CELE_F11A10.1, GI:118142313, lex-1, WormBase:WBGene00008682		3.44741	1320.42	0.383641	8.98601	2.56368e-19	2.84361e-17
RCEA014503	BX284602	F13H8.3	CCD66045.1, CELE_F13H8.3, EnsemblGenomes-Gn:WBGene00017436, EnsemblGenomes-Tr:F13H8.3.1, EnsemblGenomes-Tr:F13H8.3.2, F13H8.3, GI:351058584, GOA:Q19431, InterPro:IPR001910, InterPro:IPR023186, UniProtKB/TrEMBL:Q19431, WormBase:WBGene00017436	Inosine-uridine preferring nucleoside hydrolase (EC 3.2.2.1)	3.44601	127.766	0.748483	4.60399	4.14472e-06	2.8654e-05
RCEA040822	BX284604	swd-2.1	CCD66586.1, CELE_C33H5.6, EnsemblGenomes-Gn:WBGene00016373, EnsemblGenomes-Tr:C33H5.6, GI:351058811, InterPro:IPR001680, InterPro:IPR015943, InterPro:IPR017986, swd-2.1, UniProtKB/TrEMBL:Q18404, WormBase:WBGene00016373		3.4437	204.636	0.674085	5.10871	3.24369e-07	2.93704e-06
RCEA045035	BX284604	C42C1.8	C42C1.8, CAM36349.1, CELE_C42C1.8, EnsemblGenomes-Gn:WBGene00016586, EnsemblGenomes-Tr:C42C1.8, GI:126468476, GOA:A3QMB7, InterPro:IPR011701, InterPro:IPR020846, UniProtKB/TrEMBL:A3QMB7, WormBase:WBGene00016586		3.44285	261.126	0.564251	6.10163	1.0499e-09	1.68348e-08
RCEA081930	BX284605	ugt-18	CAA99950.2, CELE_ZC443.5, EnsemblGenomes-Gn:WBGene00013900, EnsemblGenomes-Tr:ZC443.5, GI:20803780, GOA:Q23323, InterPro:IPR002213, ugt-18, UniProtKB/TrEMBL:Q23323, WormBase:WBGene00013900	UDP-glucuronosyltransferase (EC 2.4.1.17)	3.44016	46.3799	0.846731	4.06287	4.84732e-05	0.000250847
RCEA030853	BX284604	xpc-1	CCD73179.1, CELE_Y76B12C.2, EnsemblGenomes-Gn:WBGene00022296, EnsemblGenomes-Tr:Y76B12C.2, GI:373220395, GOA:Q9N4C3, InterPro:IPR004583, InterPro:IPR018325, InterPro:IPR018326, InterPro:IPR018327, InterPro:IPR018328, UniProtKB/TrEMBL:Q9N4C3, WormBase:WBGene00022296, xpc-1		3.43957	394.54	0.562953	6.10987	9.97104e-10	1.61561e-08
RCEA016000	BX284602	ptc-1	CAA86843.2, CELE_ZK675.1, EnsemblGenomes-Gn:WBGene00004208, EnsemblGenomes-Tr:ZK675.1.1, EnsemblGenomes-Tr:ZK675.1.2, GI:172052253, ptc-1, WormBase:WBGene00004208		3.43853	1736.21	0.359233	9.57187	1.04992e-21	1.79161e-19
RCEA024145	BX284603	ZC155.4	CCD66675.1, CELE_ZC155.4, EnsemblGenomes-Gn:WBGene00022532, EnsemblGenomes-Tr:ZC155.4, GI:351058875, GOA:Q23244, InterPro:IPR004129, InterPro:IPR017946, InterPro:IPR030395, UniProtKB/TrEMBL:Q23244, WormBase:WBGene00022532, ZC155.4		3.43732	385.016	0.600485	5.72424	1.03895e-08	1.34529e-07
RCEA003296	BX284601	C06A5.6	C06A5.6, CCD61216.1, CELE_C06A5.6, EnsemblGenomes-Gn:WBGene00015504, EnsemblGenomes-Tr:C06A5.6, GI:351065256, UniProtKB/TrEMBL:O01477, WormBase:WBGene00015504		3.43608	652.01	0.619741	5.54438	2.94989e-08	3.43623e-07
RCEA003009	BX284601	pup-3	CCD63902.1, CELE_F59A3.9, EnsemblGenomes-Gn:WBGene00019082, EnsemblGenomes-Tr:F59A3.9, GI:351049859, InterPro:IPR002058, pup-3, UniProtKB/TrEMBL:P91361, WormBase:WBGene00019082		3.43367	24.7397	1.46943	2.33673	0.019453	0.0447057
RCEA036926	BX284604	H04M03.3	CCD63379.1, CELE_H04M03.3, EnsemblGenomes-Gn:WBGene00019153, EnsemblGenomes-Tr:H04M03.3, GI:351049683, GOA:Q9TYR0, H04M03.3, InterPro:IPR002198, InterPro:IPR002347, InterPro:IPR016040, InterPro:IPR020904, UniProtKB/TrEMBL:Q9TYR0, WormBase:WBGene00019153		3.43175	146.802	0.811405	4.22939	2.34324e-05	0.00013231
RCEA074567	BX284605	R02F11.4	CCD67013.1, CELE_R02F11.4, EnsemblGenomes-Gn:WBGene00019842, EnsemblGenomes-Tr:R02F11.4, GI:351059153, InterPro:IPR001611, InterPro:IPR003961, R02F11.4, UniProtKB/TrEMBL:O16366, WormBase:WBGene00019842		3.4291	383.934	0.466649	7.34833	2.00694e-13	6.84948e-12
RCEA022375	BX284603	Y54F10BM.1	CCD73838.1, CELE_Y54F10BM.1, EnsemblGenomes-Gn:WBGene00021856, EnsemblGenomes-Tr:Y54F10BM.1, GI:351051303, GOA:Q95XK4, InterPro:IPR000222, InterPro:IPR001932, InterPro:IPR015655, UniProtKB/TrEMBL:Q95XK4, WormBase:WBGene00021856, Y54F10BM.1		3.42733	293.189	0.446747	7.67176	1.69652e-14	7.24987e-13
RCEA045829	BX284604	lin-54	CAB05229.1, CELE_JC8.6, GI:6425180, lin-54, WormBase:WBGene00003037		3.42368	1035.07	0.429295	7.97513	1.52223e-15	7.78399e-14
RCEA043381	BX284604	T07G12.8	CELE_T07G12.8, EnsemblGenomes-Gn:WBGene00011599, EnsemblGenomes-Tr:T07G12.8, T07G12.8		3.42284	54.7564	1.00708	3.39876	0.000676922	0.00250894
RCEA047672	BX284604	vamp-8	CAC70077.1, CELE_B0513.9, EnsemblGenomes-Gn:WBGene00007200, EnsemblGenomes-Tr:B0513.9a, GI:15718043, GOA:Q95QZ1, InterPro:IPR001388, InterPro:IPR016444, UniProtKB/TrEMBL:Q95QZ1, vamp-8, WormBase:WBGene00007200		3.42215	56.7523	0.89748	3.81306	0.000137254	0.000623263
RCEA017701	BX284602	F52H3.4	CAA91324.2, CELE_F52H3.4, EnsemblGenomes-Gn:WBGene00009946, EnsemblGenomes-Tr:F52H3.4, F52H3.4, GI:54110639, InterPro:IPR006570, UniProtKB/TrEMBL:Q20682, WormBase:WBGene00009946		3.42082	153.212	0.656398	5.21151	1.87309e-07	1.80778e-06
RCEA016625	BX284602	C34C6.7	C34C6.7, CAV31766.1, CELE_C34C6.7, GI:218607629, UniProtKB/TrEMBL:B7WN88, WormBase:WBGene00007919		3.41311	229.378	0.664009	5.14016	2.74512e-07	2.54362e-06
RCEA043918	BX284604	spo-11	CAA92974.1, CELE_T05E11.4, EnsemblGenomes-Gn:WBGene00004985, EnsemblGenomes-Tr:T05E11.4a, GI:3879464, spo-11, WormBase:WBGene00004985		3.41003	79.4213	0.975519	3.49561	0.000472981	0.00183984
RCEA030245	BX284604	lem-4	CCD67295.1, CELE_Y55F3BR.8, GI:351059701, lem-4, WormBase:WBGene00021945	ankyrin repeat and LEM domain-containing protein 2	3.40639	236.301	0.457532	7.44513	9.68477e-14	3.5478e-12
RCEA020852	BX284602	Y54E2A.8	CAA21680.1, CELE_Y54E2A.8, GI:3881102, UniProtKB/TrEMBL:Q9XWI7, WormBase:WBGene00013193, Y54E2A.8		3.40491	270.367	0.668161	5.09594	3.47007e-07	3.12327e-06
RCEA015132	BX284602	C44B7.12	C44B7.12, CCD61565.1, CELE_C44B7.12, EnsemblGenomes-Gn:WBGene00016632, EnsemblGenomes-Tr:C44B7.12, GI:351065583, WormBase:WBGene00016632	Adenosine deaminase (EC 3.5.4.4)	3.40372	477.215	0.598514	5.68695	1.29327e-08	1.63804e-07
RCEA087281	BX284605	Y39B6A.10	CAC51067.1, CELE_Y39B6A.10, EnsemblGenomes-Gn:WBGene00012672, EnsemblGenomes-Tr:Y39B6A.10, GI:15209343, GOA:Q9NET7, UniProtKB/TrEMBL:Q9NET7, WormBase:WBGene00012672, Y39B6A.10		3.39828	77.9003	0.712711	4.7681	1.8597e-06	1.39293e-05
RCEA016284	BX284602	tdc-1	CAC42319.1, CELE_K01C8.3, EnsemblGenomes-Gn:WBGene00006562, EnsemblGenomes-Tr:K01C8.3b, GI:14530489, GOA:Q95ZS2, InterPro:IPR002129, InterPro:IPR010977, InterPro:IPR015421, InterPro:IPR015422, InterPro:IPR015424, InterPro:IPR021115, tdc-1, UniProtKB/Swiss-Prot:Q95ZS2, WormBase:WBGene00006562		3.3955	1488.7	0.556422	6.10238	1.04501e-09	1.6806e-08
RCEA018782	BX284602	ooc-3	CAA91380.1, CELE_B0334.11, EnsemblGenomes-Gn:WBGene00003868, EnsemblGenomes-Tr:B0334.11a, GI:3873751, GOA:Q9XVW6, ooc-3, UniProtKB/TrEMBL:Q9XVW6, WormBase:WBGene00003868		3.39215	622.999	0.514944	6.58743	4.47518e-11	9.57561e-10
RCEA012303	BX284602	C16C8.12	C16C8.12, CCD64702.1, CELE_C16C8.12, EnsemblGenomes-Gn:WBGene00015850, EnsemblGenomes-Tr:C16C8.12, GI:351058083, UniProtKB/TrEMBL:P91051, WormBase:WBGene00015850		3.38957	89.831	0.724403	4.67912	2.8811e-06	2.06282e-05
RCEA095838	BX284606	mrp-4	CAB02667.1, CELE_F21G4.2, EnsemblGenomes-Gn:WBGene00003410, EnsemblGenomes-Tr:F21G4.2, GI:3876209, GOA:G5EFP3, InterPro:IPR003439, InterPro:IPR003593, InterPro:IPR005292, InterPro:IPR011527, InterPro:IPR017871, InterPro:IPR027417, mrp-4, UniProtKB/TrEMBL:G5EFP3, WormBase:WBGene00003410		3.38946	1813.32	0.612189	5.53662	3.08365e-08	3.55906e-07
RCEA072051	BX284605	C39F7.5	C39F7.5, CCD67095.1, CELE_C39F7.5, EnsemblGenomes-Gn:WBGene00016540, EnsemblGenomes-Tr:C39F7.5, GI:351059222, InterPro:IPR000210, InterPro:IPR011705, UniProtKB/TrEMBL:Q9UAQ7, WormBase:WBGene00016540		3.3875	169.16	0.642236	5.27454	1.33089e-07	1.32694e-06
RCEA039793	BX284604	T22D1.5	CCD62021.1, CELE_T22D1.5, EnsemblGenomes-Gn:WBGene00020684, EnsemblGenomes-Tr:T22D1.5, GI:351018118, T22D1.5, UniProtKB/TrEMBL:Q9GZH6, WormBase:WBGene00020684		3.38554	2348.94	0.568042	5.96002	2.52201e-09	3.67581e-08
RCEA006900	BX284601	C35E7.8	C35E7.8, CCD66819.1, CELE_C35E7.8, EnsemblGenomes-Gn:WBGene00016460, EnsemblGenomes-Tr:C35E7.8, GI:373219288, GOA:O61766, UniProtKB/TrEMBL:O61766, WormBase:WBGene00016460		3.38087	45.0197	1.0918	3.09659	0.00195758	0.00632336
RCEA089858	BX284606	F47G3.3	CCD67198.1, CELE_F47G3.3, EnsemblGenomes-Gn:WBGene00018578, EnsemblGenomes-Tr:F47G3.3, F47G3.3, GI:351059612, UniProtKB/TrEMBL:Q9GYN8, WormBase:WBGene00018578		3.37945	38.0005	0.952464	3.54812	0.000387996	0.00154676
RCEA045347	BX284604	Y55D9A.2	CAA21703.2, CELE_Y55D9A.2, EnsemblGenomes-Gn:WBGene00013224, EnsemblGenomes-Tr:Y55D9A.2b, GI:15718325, GOA:Q95Q15, InterPro:IPR000253, InterPro:IPR000467, InterPro:IPR008984, UniProtKB/TrEMBL:Q95Q15, WormBase:WBGene00013224, Y55D9A.2		3.37173	297.543	0.591344	5.70181	1.18544e-08	1.51931e-07
RCEA003673	BX284601	san-1	CCD73299.1, CELE_ZC328.4, EnsemblGenomes-Gn:WBGene00004721, EnsemblGenomes-Tr:ZC328.4, GI:351064805, GOA:O02053, InterPro:IPR013212, InterPro:IPR015661, san-1, UniProtKB/TrEMBL:O02053, WormBase:WBGene00004721		3.37003	195.243	0.621008	5.4267	5.74048e-08	6.16336e-07
RCEA098654	BX284606	C04A11.2	C04A11.2, CAB03831.1, CELE_C04A11.2, EnsemblGenomes-Gn:WBGene00007286, EnsemblGenomes-Tr:C04A11.2, GI:3873968, UniProtKB/TrEMBL:O17568, WormBase:WBGene00007286		3.36168	31.6979	1.15207	2.91796	0.00352333	0.0104873
RCEA097978	BX284606	abf-6	abf-6, CAD27609.1, CELE_T22H6.7, EnsemblGenomes-Gn:WBGene00000017, EnsemblGenomes-Tr:T22H6.7, GI:19571636, UniProtKB/TrEMBL:G5EBS3, WormBase:WBGene00000017		3.35536	24.5929	1.16829	2.87203	0.00407846	0.0119232
RCEA096413	BX284606	phf-31	CAA92118.1, CELE_F13E6.3, EnsemblGenomes-Gn:WBGene00008747, EnsemblGenomes-Tr:F13E6.3, GI:3875838, GOA:Q19401, InterPro:IPR001965, InterPro:IPR011011, InterPro:IPR013083, phf-31, UniProtKB/TrEMBL:Q19401, WormBase:WBGene00008747		3.34704	11.6404	1.42066	2.35598	0.0184737	0.0428073
RCEA079674	BX284605	lig-1	CAA98242.2, CELE_C29A12.3, GI:54110912, lig-1, WormBase:WBGene00002985	ATP-dependent DNA ligase (EC 6.5.1.1)	3.34466	855.597	0.468529	7.13864	9.42591e-13	2.81008e-11
RCEA009093	BX284601	C37A5.3	C37A5.3, CBK19380.1, CELE_C37A5.3, EnsemblGenomes-Gn:WBGene00014698, EnsemblGenomes-Tr:C37A5.3.1, EnsemblGenomes-Tr:C37A5.3.2, GI:290447239, UniProtKB/TrEMBL:D3YT89, WormBase:WBGene00014698	Hypothetical protein	3.33617	22.8456	1.16326	2.86795	0.00413145	0.0120524
RCEA023953	BX284603	eri-9	CDX47430.1, CELE_C26E6.7, eri-9, GI:671688057, InterPro:IPR028079, UniProtKB/TrEMBL:A0A078BTJ4, WormBase:WBGene00016143		3.33601	297.397	0.656037	5.0851	3.6743e-07	3.28943e-06
RCEA019327	BX284602	sinh-1	CAB55023.3, CELE_Y57A10A.20, EnsemblGenomes-Gn:WBGene00013261, EnsemblGenomes-Tr:Y57A10A.20, GI:215414876, sinh-1, WormBase:WBGene00013261		3.33484	119.933	0.739651	4.50866	6.52368e-06	4.28988e-05
RCEA012462	BX284602	F19B10.5	CCD69695.1, CELE_F19B10.5, EnsemblGenomes-Gn:WBGene00017587, EnsemblGenomes-Tr:F19B10.5, F19B10.5, GI:351061842, UniProtKB/TrEMBL:O02067, WormBase:WBGene00017587		3.3345	23.6187	1.27747	2.61025	0.00904769	0.023544
RCEA005775	BX284601	C17E4.10	C17E4.10, CAB02748.2, CELE_C17E4.10, GI:25809198, GOA:Q93231, UniProtKB/TrEMBL:Q93231, WormBase:WBGene00007647		3.33421	573.837	0.548699	6.07658	1.22771e-09	1.93119e-08
RCEA044108	BX284604	F54E12.2	CAB05213.1, CELE_F54E12.2, EnsemblGenomes-Gn:WBGene00010061, EnsemblGenomes-Tr:F54E12.2.1, EnsemblGenomes-Tr:F54E12.2.2, F54E12.2, GI:3877578, GOA:G5EEW5, InterPro:IPR000330, InterPro:IPR001650, InterPro:IPR014001, InterPro:IPR027417, UniProtKB/TrEMBL:G5EEW5, WormBase:WBGene00010061		3.33299	1019.5	0.566796	5.8804	4.09266e-09	5.73238e-08
RCEA081349	BX284605	capg-2	CAB01569.1, capg-2, CELE_F55C5.4, EnsemblGenomes-Gn:WBGene00010093, EnsemblGenomes-Tr:F55C5.4, GI:3877622, GOA:Q20818, InterPro:IPR011989, InterPro:IPR016024, InterPro:IPR024741, UniProtKB/TrEMBL:Q20818, WormBase:WBGene00010093		3.33141	349.907	0.55292	6.02511	1.68995e-09	2.55953e-08
RCEA013004	BX284602	M03A1.8	CCD70555.1, CELE_M03A1.8, EnsemblGenomes-Gn:WBGene00077490, EnsemblGenomes-Tr:M03A1.8, GI:373254365, GOA:A9Z1K9, InterPro:IPR004877, InterPro:IPR006593, M03A1.8, UniProtKB/TrEMBL:A9Z1K9, WormBase:WBGene00077490		3.32798	124.298	0.673359	4.94235	7.71865e-07	6.37655e-06
RCEA025865	BX284603	C18H2.2	C18H2.2, CELE_C18H2.2		3.31608	18.3297	1.1701	2.83401	0.00459685	0.0132487
RCEA083784	BX284605	cdt-2	CAB01663.2, cdt-2, CELE_T01C3.1, EnsemblGenomes-Gn:WBGene00011318, EnsemblGenomes-Tr:T01C3.1, GI:169402771, GOA:Q22059, InterPro:IPR001680, InterPro:IPR015943, InterPro:IPR017986, InterPro:IPR020472, UniProtKB/TrEMBL:Q22059, WormBase:WBGene00011318		3.31424	508.373	0.630829	5.25378	1.49009e-07	1.47107e-06
RCEA023648	BX284603	smc-4	CAA86336.1, CELE_F35G12.8, EnsemblGenomes-Gn:WBGene00004874, EnsemblGenomes-Tr:F35G12.8, GI:3876724, smc-4, WormBase:WBGene00004874		3.30486	675.616	0.573598	5.76163	8.33064e-09	1.10042e-07
RCEA086463	BX284605	Y59A8B.21	CAC14416.3, CELE_Y59A8B.21, EnsemblGenomes-Gn:WBGene00013353, EnsemblGenomes-Tr:Y59A8B.21, GI:156558233, GOA:Q9GRY3, InterPro:IPR011701, InterPro:IPR020846, UniProtKB/TrEMBL:Q9GRY3, WormBase:WBGene00013353, Y59A8B.21		3.30316	254.048	0.665417	4.96405	6.90369e-07	5.79211e-06
RCEA006262	BX284601	sqv-5	CELE_T24D1.1, CTQ86378.1, GI:919006354, GOA:A0A0K3ATP9, sqv-5, UniProtKB/TrEMBL:A0A0K3ATP9, WormBase:WBGene00005023		3.30234	928.29	0.566184	5.83263	5.45616e-09	7.43671e-08
RCEA002506	BX284601	kca-1	CCD64222.1, CELE_C10H11.10, EnsemblGenomes-Gn:WBGene00015698, EnsemblGenomes-Tr:C10H11.10, GI:351050102, GOA:G5EBU5, kca-1, UniProtKB/TrEMBL:G5EBU5, WormBase:WBGene00015698		3.29677	428.854	0.476401	6.92016	4.51133e-12	1.18354e-10
RCEA090752	BX284606	vit-3	CCD71957.1, CELE_F59D8.1, EnsemblGenomes-Gn:WBGene00006927, EnsemblGenomes-Tr:F59D8.1, GI:351063735, vit-3, WormBase:WBGene00006927	Vitellogenin	3.29238	6925.27	0.966795	3.40545	0.000660541	0.00245728
RCEA011722	BX284602	F08D12.3	CCD69001.1, CELE_F08D12.3, EnsemblGenomes-Gn:WBGene00017247, EnsemblGenomes-Tr:F08D12.3, F08D12.3, GI:373219594, InterPro:IPR007026, UniProtKB/TrEMBL:P91237, WormBase:WBGene00017247		3.28689	412.178	0.690137	4.76266	1.91058e-06	1.4275e-05
RCEA074891	BX284605	B0238.12	B0238.12, CCD61492.1, CELE_B0238.12, EnsemblGenomes-Gn:WBGene00015076, EnsemblGenomes-Tr:B0238.12, GI:351065523, InterPro:IPR002919, UniProtKB/TrEMBL:O16488, WormBase:WBGene00015076		3.28311	70.5952	0.923095	3.55663	0.00037564	0.00150386
RCEA086530	BX284605	par-4	CAC14418.2, CELE_Y59A8B.14, GI:14530656, par-4, WormBase:WBGene00003919		3.2816	301.497	0.577192	5.68546	1.30463e-08	1.65103e-07
RCEA084589	BX284605	fbxa-69	CAB07625.1, CELE_F54B8.3, EnsemblGenomes-Gn:WBGene00010018, EnsemblGenomes-Tr:F54B8.3, fbxa-69, GI:3877553, InterPro:IPR001810, InterPro:IPR002900, InterPro:IPR003615, UniProtKB/TrEMBL:O45561, WormBase:WBGene00010018		3.28041	22.1809	1.09887	2.98525	0.00283343	0.00869984
RCEA087232	BX284605	asp-17	asp-17, CAD31821.1, CELE_Y39B6A.24, EnsemblGenomes-Gn:WBGene00012683, EnsemblGenomes-Tr:Y39B6A.24, GI:21038846, GOA:Q8MYN5, InterPro:IPR001461, InterPro:IPR001969, InterPro:IPR021109, UniProtKB/TrEMBL:Q8MYN5, WormBase:WBGene00012683		3.27693	293.416	0.875991	3.74082	0.000183417	0.000802218
RCEA011784	BX284602	Y110A2AL.9	CCD72982.1, CELE_Y110A2AL.9, EnsemblGenomes-Gn:WBGene00022445, EnsemblGenomes-Tr:Y110A2AL.9, GI:351064538, InterPro:IPR007026, UniProtKB/TrEMBL:Q9N499, WormBase:WBGene00022445, Y110A2AL.9		3.2736	63.2893	1.09529	2.9888	0.00280075	0.00861705
RCEA071348	BX284605	phf-10	CCD70456.1, CELE_F33E11.6, EnsemblGenomes-Gn:WBGene00018013, EnsemblGenomes-Tr:F33E11.6b, GI:351062484, GOA:Q2A950, InterPro:IPR001965, InterPro:IPR011011, InterPro:IPR013083, InterPro:IPR019787, phf-10, UniProtKB/TrEMBL:Q2A950, WormBase:WBGene00018013		3.27316	402.225	0.481951	6.79148	1.10992e-11	2.69e-10
RCEA002536	BX284601	F57C9.6	CCD62438.1, CELE_F57C9.6, EnsemblGenomes-Gn:WBGene00019012, EnsemblGenomes-Tr:F57C9.6, F57C9.6, GI:351020450, GOA:O01818, InterPro:IPR000276, InterPro:IPR017452, UniProtKB/TrEMBL:O01818, WormBase:WBGene00019012		3.27168	35.9964	0.9498	3.4446	0.000571904	0.00216709
RCEA044834	BX284604	mig-32	CAA92594.4, CELE_F11A10.3, GI:295982010, GOA:Q19336, InterPro:IPR001841, InterPro:IPR013083, InterPro:IPR017907, InterPro:IPR018957, mig-32, UniProtKB/TrEMBL:Q19336, WormBase:WBGene00008684		3.26911	422.322	0.654676	4.99347	5.9304e-07	5.0571e-06
RCEA025057	BX284603	T26A5.2	CCD63218.1, CELE_T26A5.2, GI:351047537, T26A5.2, UniProtKB/TrEMBL:H2KYG8, WormBase:WBGene00020819		3.26852	185.702	0.809674	4.03683	5.41781e-05	0.000276201
RCEA004566	BX284601	gld-1	CAB03417.1, CELE_T23G11.3, EnsemblGenomes-Gn:WBGene00001595, EnsemblGenomes-Tr:T23G11.3.1, EnsemblGenomes-Tr:T23G11.3.2, EnsemblGenomes-Tr:T23G11.3.3, GI:3880113, gld-1, WormBase:WBGene00001595		3.26592	2629.88	0.421137	7.75501	8.83351e-15	3.96588e-13
RCEA005199	BX284601	syp-3	CAB03087.2, CELE_F39H2.4, EnsemblGenomes-Gn:WBGene00006377, EnsemblGenomes-Tr:F39H2.4, GI:148879345, GOA:O62238, syp-3, UniProtKB/TrEMBL:O62238, WormBase:WBGene00006377		3.26195	114.016	0.889822	3.66585	0.000246522	0.00103645
RCEA097391	BX284606	lsd-1	CAA90637.2, CELE_T08D10.2, EnsemblGenomes-Gn:WBGene00011615, EnsemblGenomes-Tr:T08D10.2, GI:27753116, GOA:Q22343, InterPro:IPR002937, InterPro:IPR007526, InterPro:IPR009057, InterPro:IPR011991, InterPro:IPR017366, InterPro:IPR023753, lsd-1, UniProtKB/TrEMBL:Q22343, WormBase:WBGene00011615		3.26116	101.546	0.593536	5.49446	3.91901e-08	4.40196e-07
RCEA015563	BX284602	aka-1	aka-1, CCD68340.1, CELE_D1022.7, EnsemblGenomes-Gn:WBGene00000101, EnsemblGenomes-Tr:D1022.7b.1, EnsemblGenomes-Tr:D1022.7b.2, GI:373219518, GOA:H2KZI9, InterPro:IPR000306, InterPro:IPR011011, InterPro:IPR013083, InterPro:IPR017455, InterPro:IPR022557, UniProtKB/TrEMBL:H2KZI9, WormBase:WBGene00000101		3.25947	1447.76	0.637225	5.1151	3.13569e-07	2.85332e-06
RCEA091565	BX284606	C05E11.6	C05E11.6, CCD63262.1, CELE_C05E11.6, EnsemblGenomes-Gn:WBGene00015495, EnsemblGenomes-Tr:C05E11.6, GI:351047585, InterPro:IPR031098, UniProtKB/TrEMBL:Q17662, WormBase:WBGene00015495		3.25902	20.5889	1.11074	2.93409	0.00334523	0.0100244
RCEA024379	BX284603	madf-11	CCD63125.1, CELE_C05D2.6, GI:373218775, InterPro:IPR006578, madf-11, UniProtKB/TrEMBL:O45133, WormBase:WBGene00015468		3.25519	131.884	0.604723	5.38294	7.32782e-08	7.70852e-07
RCEA012221	BX284602	bath-27	bath-27, CCD69481.1, CELE_F14D2.1, EnsemblGenomes-Gn:WBGene00017450, EnsemblGenomes-Tr:F14D2.1, GI:351061635, InterPro:IPR000210, InterPro:IPR011333, UniProtKB/TrEMBL:O44810, WormBase:WBGene00017450		3.2548	37.6273	0.988635	3.29222	0.000994003	0.00348872
RCEA011879	BX284602	C41H7.5	C41H7.5, CCG28271.1, CELE_C41H7.5, EnsemblGenomes-Gn:WBGene00016575, EnsemblGenomes-Tr:C41H7.5a, GI:379656882, InterPro:IPR005020, UniProtKB/TrEMBL:H8W3W8, WormBase:WBGene00016575		3.25226	78.9552	0.714782	4.55001	5.36445e-06	3.60458e-05
RCEA035030	BX284604	Y4C6A.3	CCD74031.1, CELE_Y4C6A.3, EnsemblGenomes-Gn:WBGene00021153, EnsemblGenomes-Tr:Y4C6A.3, GI:351051120, GOA:Q9N4T7, InterPro:IPR001841, InterPro:IPR013083, InterPro:IPR017907, UniProtKB/TrEMBL:Q9N4T7, WormBase:WBGene00021153, Y4C6A.3		3.25093	127.643	0.714101	4.55248	5.30166e-06	3.56864e-05
RCEA006436	BX284601	rsa-1	CAB02769.1, CELE_C25A1.9, EnsemblGenomes-Gn:WBGene00007710, EnsemblGenomes-Tr:C25A1.9a, GI:3874444, GOA:O02217, InterPro:IPR011992, InterPro:IPR028846, rsa-1, UniProtKB/TrEMBL:O02217, WormBase:WBGene00007710		3.2493	647.409	0.455154	7.1389	9.4082e-13	2.81008e-11
RCEA018984	BX284602	xpf-1	CAA93766.2, CELE_C47D12.8, EnsemblGenomes-Gn:WBGene00008140, EnsemblGenomes-Tr:C47D12.8, GI:6782250, GOA:G5EBZ1, InterPro:IPR006166, InterPro:IPR011335, InterPro:IPR020819, UniProtKB/TrEMBL:G5EBZ1, WormBase:WBGene00008140, xpf-1	DNA REPAIR PROTEIN (RAD1/RAD16/XPF FAMILY)	3.24831	661.594	0.398205	8.15739	3.42347e-16	1.99394e-14
RCEA085083	BX284605	fbxa-2	CAB07669.2, CELE_T13F3.5, EnsemblGenomes-Gn:WBGene00011752, EnsemblGenomes-Tr:T13F3.5, fbxa-2, GI:82465321, InterPro:IPR001810, InterPro:IPR002900, UniProtKB/TrEMBL:O18085, WormBase:WBGene00011752	Hypothetical protein	3.2455	15.9608	1.26609	2.56341	0.0103649	0.0264558
RCEA004886	BX284601	gla-3	CAB04666.1, CELE_T02E1.3, EnsemblGenomes-Gn:WBGene00011376, EnsemblGenomes-Tr:T02E1.3b, GI:3879305, gla-3, GOA:O02289, InterPro:IPR000571, UniProtKB/TrEMBL:O02289, WormBase:WBGene00011376		3.24494	371.79	0.526515	6.16306	7.13518e-10	1.19196e-08
RCEA013680	BX284602	EEED8.14	CCD68744.1, CELE_EEED8.14, EEED8.14, EnsemblGenomes-Gn:WBGene00017142, EnsemblGenomes-Tr:EEED8.14, GI:351060997, InterPro:IPR011038, UniProtKB/TrEMBL:Q19069, WormBase:WBGene00017142		3.24291	100.277	0.76301	4.25015	2.13623e-05	0.00012188
RCEA016549	BX284602	F28C6.10	CAA92676.1, CELE_F28C6.10, EnsemblGenomes-Gn:WBGene00009209, EnsemblGenomes-Tr:F28C6.10, F28C6.10, GI:3876359, UniProtKB/TrEMBL:Q93621, WormBase:WBGene00009209		3.24238	26.5028	1.0495	3.08945	0.00200529	0.00645534
RCEA009641	BX284602	F23F1.6	CCD62355.1, CELE_F23F1.6, EnsemblGenomes-Gn:WBGene00017747, EnsemblGenomes-Tr:F23F1.6, F23F1.6, GI:373218664, GOA:O17069, InterPro:IPR002293, InterPro:IPR004755, InterPro:IPR029485, UniProtKB/TrEMBL:O17069, WormBase:WBGene00017747	Cationic amino acid transporter	3.24151	205.879	0.803066	4.03641	5.42744e-05	0.000276598
RCEA045898	BX284604	rec-8	CAB05309.1, CELE_W02A2.6, EnsemblGenomes-Gn:WBGene00004333, EnsemblGenomes-Tr:W02A2.6a, GI:4008407, rec-8, WormBase:WBGene00004333		3.2406	497.529	0.477865	6.78142	1.19004e-11	2.85402e-10
RCEA045030	BX284604	erl-1	CAM36358.1, CELE_C42C1.15, EnsemblGenomes-Gn:WBGene00016592, EnsemblGenomes-Tr:C42C1.15, erl-1, GI:126468485, GOA:A3QMC6, InterPro:IPR001107, UniProtKB/TrEMBL:A3QMC6, WormBase:WBGene00016592		3.23875	205.078	0.530112	6.10955	9.99114e-10	1.61577e-08
RCEA008925	BX284601	W04A8.6	CBM41234.1, CELE_W04A8.6, EnsemblGenomes-Gn:WBGene00012241, EnsemblGenomes-Tr:W04A8.6a, GI:297374718, UniProtKB/TrEMBL:D7SFQ2, W04A8.6, WormBase:WBGene00012241		3.23599	293.275	0.453678	7.13279	9.83512e-13	2.92629e-11
RCEA014592	BX284602	ani-2	ani-2, CCD66397.1, CELE_K10B2.5, EnsemblGenomes-Gn:WBGene00019608, EnsemblGenomes-Tr:K10B2.5, GI:351058700, WormBase:WBGene00019608		3.2309	626.663	0.507916	6.36109	2.00328e-10	3.74468e-09
RCEA004967	BX284601	mys-4	CAC42264.1, CELE_C34B7.4, EnsemblGenomes-Gn:WBGene00007914, EnsemblGenomes-Tr:C34B7.4, GI:14530378, GOA:Q95ZX6, InterPro:IPR001965, InterPro:IPR002717, InterPro:IPR011011, InterPro:IPR013083, InterPro:IPR016181, mys-4, UniProtKB/TrEMBL:Q95ZX6, WormBase:WBGene00007914	histone acetyltransferase MYST3 (EC 2.3.1.48)	3.23033	122.314	0.81283	3.97418	7.06235e-05	0.000348497
RCEA082659	BX284605	T01D3.6	CAB03262.1, CELE_T01D3.6, EnsemblGenomes-Gn:WBGene00011330, EnsemblGenomes-Tr:T01D3.6a, GI:3879261, GOA:G5EDT4, InterPro:IPR000152, InterPro:IPR000742, InterPro:IPR001846, InterPro:IPR001881, InterPro:IPR002181, InterPro:IPR002919, InterPro:IPR013032, InterPro:IPR014715, InterPro:IPR014716, InterPro:IPR018097, InterPro:IPR023413, T01D3.6, UniProtKB/TrEMBL:G5EDT4, WormBase:WBGene00011330		3.22768	5416.54	0.651866	4.95146	7.366e-07	6.11873e-06
RCEA082954	BX284605	vps-39	CAJ85769.1, CELE_T08G5.5, EnsemblGenomes-Gn:WBGene00011625, EnsemblGenomes-Tr:T08G5.5b, GI:90185939, GOA:Q1ZXS5, InterPro:IPR000547, InterPro:IPR001180, InterPro:IPR015943, InterPro:IPR017986, InterPro:IPR019452, InterPro:IPR019453, UniProtKB/TrEMBL:Q1ZXS5, vps-39, WormBase:WBGene00011625	AMSH	3.22724	1164.84	0.399325	8.08175	6.38437e-16	3.5149e-14
RCEA019048	BX284602	dna-2	CAA90399.1, CELE_F43G6.1, dna-2, EnsemblGenomes-Gn:WBGene00001016, EnsemblGenomes-Tr:F43G6.1a, GI:3877086, GOA:Q20371, InterPro:IPR014808, InterPro:IPR027417, UniProtKB/TrEMBL:Q20371, WormBase:WBGene00001016		3.22648	540.253	0.506641	6.36837	1.91043e-10	3.60687e-09
RCEA028119	BX284603	orc-1	CAA21023.1, CELE_Y39A1A.12, EnsemblGenomes-Gn:WBGene00012650, EnsemblGenomes-Tr:Y39A1A.12, GI:3880850, GOA:Q9XX17, InterPro:IPR003593, InterPro:IPR003959, InterPro:IPR011991, InterPro:IPR015163, InterPro:IPR027417, orc-1, UniProtKB/TrEMBL:Q9XX17, WormBase:WBGene00012650		3.22219	389.891	0.519745	6.19954	5.66267e-10	9.59791e-09
RCEA046400	BX284604	C08F11.11	C08F11.11, CAB05678.1, CELE_C08F11.11, EnsemblGenomes-Gn:WBGene00007458, EnsemblGenomes-Tr:C08F11.11.1, EnsemblGenomes-Tr:C08F11.11.2, GI:3874186, WormBase:WBGene00007458		3.22202	5064.59	0.788039	4.08866	4.33871e-05	0.000227571
RCEA029343	BX284603	Y39E4B.5	CAB54427.1, CELE_Y39E4B.5, EnsemblGenomes-Gn:WBGene00012716, EnsemblGenomes-Tr:Y39E4B.5, GI:5824778, GOA:Q9U2K5, InterPro:IPR005828, InterPro:IPR020846, UniProtKB/TrEMBL:Q9U2K5, WormBase:WBGene00012716, Y39E4B.5		3.21132	241.327	0.577523	5.5605	2.69002e-08	3.15299e-07
RCEA018078	BX284602	C06A1.4	C06A1.4, CELE_C06A1.4		3.21009	371.672	0.627981	5.11177	3.19161e-07	2.89831e-06
RCEA046048	BX284604	dcap-2	CAB05204.2, CELE_F52G2.1, dcap-2, GI:82658170, WormBase:WBGene00003582		3.20971	468.506	0.46929	6.8395	7.94703e-12	1.98808e-10
RCEA077157	BX284605	Y97E10AR.3	CCD71180.1, CELE_Y97E10AR.3, EnsemblGenomes-Gn:WBGene00022398, EnsemblGenomes-Tr:Y97E10AR.3, GI:351063136, InterPro:IPR006570, UniProtKB/TrEMBL:Q9N2U8, WormBase:WBGene00022398, Y97E10AR.3		3.20928	177.68	0.566112	5.66898	1.43647e-08	1.79977e-07
RCEA086322	BX284605	fat-5	CAB04924.1, CELE_W06D12.3, EnsemblGenomes-Gn:WBGene00001397, EnsemblGenomes-Tr:W06D12.3, fat-5, GI:3880548, WormBase:WBGene00001397	Acyl-CoA desaturase (EC 1.14.19.1)	3.20639	1287.8	0.468363	6.84594	7.59731e-12	1.90691e-10
RCEA081727	BX284605	erg-28	CAC42259.1, CELE_C14C10.6, EnsemblGenomes-Gn:WBGene00007589, EnsemblGenomes-Tr:C14C10.6, erg-28, GI:14530349, GOA:G5EEQ9, UniProtKB/TrEMBL:G5EEQ9, WormBase:WBGene00007589		3.20431	45.2392	0.99788	3.21112	0.0013222	0.00447306
RCEA086256	BX284605	fbxa-108	CAB04531.2, CELE_F59A1.7, EnsemblGenomes-Gn:WBGene00010293, EnsemblGenomes-Tr:F59A1.7, fbxa-108, GI:82465309, InterPro:IPR001810, InterPro:IPR002900, UniProtKB/TrEMBL:Q9XUW2, WormBase:WBGene00010293		3.20198	89.3998	0.812461	3.94109	8.1112e-05	0.000393939
RCEA089744	BX284606	hex-1	CCD68941.1, CELE_T14F9.3, EnsemblGenomes-Gn:WBGene00020509, EnsemblGenomes-Tr:T14F9.3, GI:351061181, hex-1, WormBase:WBGene00020509	hexosaminidase (EC 3.2.1.52)	3.20189	748.344	0.515899	6.20643	5.42007e-10	9.2282e-09
RCEA074140	BX284605	phat-3	CCD67688.1, CELE_C49G7.4, EnsemblGenomes-Gn:WBGene00016782, EnsemblGenomes-Tr:C49G7.4.1, EnsemblGenomes-Tr:C49G7.4.2, GI:351060065, InterPro:IPR003582, phat-3, UniProtKB/TrEMBL:O16225, WormBase:WBGene00016782		3.20083	160.451	0.974252	3.28543	0.00101828	0.00356067
RCEA032703	BX284604	cyp-31A3	CCD68717.1, CELE_Y17G9B.3, cyp-31A3, EnsemblGenomes-Gn:WBGene00021200, EnsemblGenomes-Tr:Y17G9B.3, GI:351060969, GOA:Q9N574, InterPro:IPR001128, InterPro:IPR002401, InterPro:IPR017972, UniProtKB/TrEMBL:Q9N574, WormBase:WBGene00021200	Carboxypeptidase M precursor (EC 3.4.17.12)	3.19758	246.168	0.627547	5.09537	3.4806e-07	3.13088e-06
RCEA011740	BX284602	K12H6.2	CCD72957.1, CELE_K12H6.2, EnsemblGenomes-Gn:WBGene00019683, EnsemblGenomes-Tr:K12H6.2, GI:373220311, GOA:Q9N5H7, K12H6.2, UniProtKB/TrEMBL:Q9N5H7, WormBase:WBGene00019683		3.19692	44.8234	0.97135	3.29122	0.000997545	0.00349871
RCEA097946	BX284606	pgp-12	CAA91799.1, CELE_F22E10.1, EnsemblGenomes-Gn:WBGene00004006, EnsemblGenomes-Tr:F22E10.1, GI:3876291, GOA:Q19733, InterPro:IPR003439, InterPro:IPR003593, InterPro:IPR011527, InterPro:IPR017871, InterPro:IPR027417, pgp-12, UniProtKB/TrEMBL:Q19733, WormBase:WBGene00004006		3.1948	96.3223	0.623449	5.12441	2.98477e-07	2.73378e-06
RCEA007749	BX284601	ksr-2	CAB70239.2, CELE_F58D5.4, GI:21615490, GOA:G5EDA5, InterPro:IPR000719, InterPro:IPR001245, InterPro:IPR002219, InterPro:IPR008266, InterPro:IPR011009, ksr-2, UniProtKB/Swiss-Prot:G5EDA5, WormBase:WBGene00002240		3.19394	129.052	0.655671	4.87125	1.10892e-06	8.80656e-06
RCEA042966	BX284604	ndc-80	CAA92629.1, CELE_W01B6.9, EnsemblGenomes-Gn:WBGene00003576, EnsemblGenomes-Tr:W01B6.9, GI:3880394, ndc-80, WormBase:WBGene00003576		3.19389	498.482	0.653817	4.88499	1.03434e-06	8.29062e-06
RCEA043091	BX284604	gon-4	CAA93515.2, CELE_K04D7.5, EnsemblGenomes-Gn:WBGene00001653, EnsemblGenomes-Tr:K04D7.5a, GI:34555825, GOA:Q21216, gon-4, UniProtKB/TrEMBL:Q21216, WormBase:WBGene00001653	Hypothetical protein	3.19333	364.454	0.611391	5.22305	1.75998e-07	1.71065e-06
RCEA025595	BX284603	R151.8	CCD70763.1, CELE_R151.8, GI:351062729, InterPro:IPR001005, R151.8, UniProtKB/TrEMBL:Q21999, WormBase:WBGene00020111		3.19164	230.72	0.513445	6.21614	5.09542e-10	8.68524e-09
RCEA086543	BX284605	fbxa-210	CBW48578.1, CELE_Y37H2A.5, EnsemblGenomes-Gn:WBGene00012565, EnsemblGenomes-Tr:Y37H2A.5b, fbxa-210, GI:306419487, InterPro:IPR001810, InterPro:IPR002900, UniProtKB/TrEMBL:E0R7K6, WormBase:WBGene00012565		3.18796	330.393	0.434437	7.33814	2.16575e-13	7.29248e-12
RCEA006697	BX284601	ubc-25	CAB02096.2, CELE_F25H2.8, GI:32697981, ubc-25, WormBase:WBGene00006720	Ubiquitin-conjugating enzyme E2 (EC 6.3.2.19)	3.18362	1777.31	0.302451	10.5261	6.55241e-26	2.47108e-23
RCEA015697	BX284602	npp-21	CCD70514.1, CELE_R07G3.3, EnsemblGenomes-Gn:WBGene00019940, EnsemblGenomes-Tr:R07G3.3b, GI:351062537, npp-21, UniProtKB/TrEMBL:Q5WRT9, WormBase:WBGene00019940	Hypothetical protein	3.18337	1074.42	0.542272	5.87043	4.34676e-09	6.06577e-08
RCEA012032	BX284602	sri-40	CCD73682.1, CELE_Y27F2A.3, EnsemblGenomes-Gn:WBGene00005552, EnsemblGenomes-Tr:Y27F2A.3a, GI:351059281, GOA:Q9N549, InterPro:IPR019429, sri-40, UniProtKB/TrEMBL:Q9N549, WormBase:WBGene00005552		3.17885	109.079	0.719171	4.42016	9.86298e-06	6.15314e-05
RCEA003947	BX284601	cye-1	CCD66921.1, CELE_C37A2.4, cye-1, GI:351059065, WormBase:WBGene00000871		3.17764	558.546	0.524666	6.05649	1.39123e-09	2.1569e-08
RCEA023590	BX284603	cdh-4	CAA84661.2, cdh-4, CELE_F25F2.2, GI:211970335, WormBase:WBGene00000396	Protocadherin	3.17483	214.332	0.517085	6.13986	8.25941e-10	1.36167e-08
RCEA015097	BX284602	dnj-5	CCD62846.1, CELE_C04A2.7, dnj-5, GI:351020870, WormBase:WBGene00001023		3.17152	1742.55	0.459171	6.90706	4.94811e-12	1.28251e-10
RCEA023790	BX284603	B0393.3	B0393.3, CAA86056.1, CELE_B0393.3, EnsemblGenomes-Gn:WBGene00007168, EnsemblGenomes-Tr:B0393.3, GI:3873736, GOA:Q17492, UniProtKB/TrEMBL:Q17492, WormBase:WBGene00007168		3.16515	613.126	0.429566	7.36824	1.72897e-13	5.98198e-12
RCEA013640	BX284602	agt-2	agt-2, CCD68765.1, CELE_F09E5.13, EnsemblGenomes-Gn:WBGene00000094, EnsemblGenomes-Tr:F09E5.13, GI:351061020, GOA:Q19263, UniProtKB/TrEMBL:Q19263, WormBase:WBGene00000094		3.1644	100.466	0.715644	4.42174	9.79076e-06	6.11821e-05
RCEA085193	BX284605	F13A7.14	CAM84803.2, CELE_F13A7.14, EnsemblGenomes-Gn:WBGene00045357, EnsemblGenomes-Tr:F13A7.14, F13A7.14, GI:198446545, UniProtKB/TrEMBL:G5ECN0, WormBase:WBGene00045357		3.16018	217.209	0.637032	4.96079	7.02084e-07	5.88713e-06
RCEA029034	BX284603	pie-1	CAB11564.2, CELE_Y49E10.14, GI:14530635, pie-1, WormBase:WBGene00004027		3.15427	526.223	0.523974	6.0199	1.74525e-09	2.63799e-08
RCEA006285	BX284601	sys-1	CAB03402.1, CELE_T23D8.9, EnsemblGenomes-Gn:WBGene00006379, EnsemblGenomes-Tr:T23D8.9a, GI:3880079, GOA:Q9XVI2, InterPro:IPR011989, InterPro:IPR016024, PDB:3C2G, PDB:3C2H, sys-1, UniProtKB/TrEMBL:Q9XVI2, WormBase:WBGene00006379		3.15404	78.2687	0.782234	4.03209	5.52825e-05	0.000280787
RCEA027945	BX284603	tbc-8	CCH63807.1, CELE_C38H2.1, GI:387912151, GOA:I2HAA0, InterPro:IPR000195, InterPro:IPR004012, tbc-8, UniProtKB/TrEMBL:I2HAA0, WormBase:WBGene00008018	PROBABLE GYP7 PROTEIN	3.15232	27.659	1.0778	2.92478	0.00344699	0.0102925
RCEA073741	BX284605	lys-7	CCD62480.1, CELE_C02A12.4, EnsemblGenomes-Gn:WBGene00003096, EnsemblGenomes-Tr:C02A12.4, GI:351020498, GOA:O16202, InterPro:IPR013781, InterPro:IPR017853, lys-7, UniProtKB/TrEMBL:O16202, WormBase:WBGene00003096		3.15225	3521.93	0.700013	4.50313	6.69605e-06	4.38221e-05
RCEA089434	BX284606	ceh-21	CCD64528.1, ceh-21, CELE_T26C11.6, GI:351057922, WormBase:WBGene00000444		3.15059	212.219	0.716977	4.39427	1.11147e-05	6.83512e-05
RCEA037957	BX284604	zen-4	CCD72300.2, CELE_M03D4.1, EnsemblGenomes-Gn:WBGene00006974, EnsemblGenomes-Tr:M03D4.1d.1, EnsemblGenomes-Tr:M03D4.1d.2, GI:563403619, GOA:Q8MQ03, InterPro:IPR001752, InterPro:IPR019821, InterPro:IPR027417, InterPro:IPR027640, InterPro:IPR032384, UniProtKB/TrEMBL:Q8MQ03, WormBase:WBGene00006974, zen-4		3.14663	637.311	0.498611	6.31079	2.77617e-10	5.0034e-09
RCEA023873	BX284603	ced-4	CCD66782.1, ced-4, CELE_C35D10.9, EnsemblGenomes-Gn:WBGene00000418, EnsemblGenomes-Tr:C35D10.9b, GI:351058957, WormBase:WBGene00000418		3.14518	161.236	0.601109	5.2323	1.67413e-07	1.63776e-06
RCEA001822	BX284601	inx-22	CCD72547.1, CELE_Y47G6A.2, EnsemblGenomes-Gn:WBGene00002144, EnsemblGenomes-Tr:Y47G6A.2.1, EnsemblGenomes-Tr:Y47G6A.2.2, GI:373220147, GOA:Q9N3R5, InterPro:IPR000990, inx-22, UniProtKB/TrEMBL:Q9N3R5, WormBase:WBGene00002144		3.14487	684.427	0.497298	6.32391	2.55024e-10	4.64057e-09
RCEA080241	BX284605	gly-20	CAB03823.2, CELE_C03E10.4, EnsemblGenomes-Gn:WBGene00001645, EnsemblGenomes-Tr:C03E10.4, GI:13548344, gly-20, GOA:O17560, InterPro:IPR007754, InterPro:IPR029044, UniProtKB/TrEMBL:O17560, WormBase:WBGene00001645	Alpha-1,6-mannosyl-glycoprotein beta-1,2-N- acetylglucosaminyltransferase (EC 2.4.1.143)	3.14447	724.91	0.435563	7.21933	5.22439e-13	1.61827e-11
RCEA023400	BX284603	nth-1	CAA90766.2, CELE_R10E4.5, GI:257145792, nth-1, WormBase:WBGene00011201	Endonuclease III (EC 4.2.99.18)	3.13808	53.9467	0.913577	3.43494	0.000592692	0.00223571
RCEA024594	BX284603	F01F1.11	CCD65996.1, CELE_F01F1.11, EnsemblGenomes-Gn:WBGene00017165, EnsemblGenomes-Tr:F01F1.11, F01F1.11, GI:351058533, UniProtKB/TrEMBL:Q19090, WormBase:WBGene00017165		3.13601	270.053	0.549251	5.70962	1.1323e-08	1.45492e-07
RCEA075971	BX284605	hcp-1	CCD68844.1, CELE_ZK1055.1, EnsemblGenomes-Gn:WBGene00001829, EnsemblGenomes-Tr:ZK1055.1, GI:351061090, GOA:O76447, hcp-1, UniProtKB/TrEMBL:O76447, WormBase:WBGene00001829		3.13584	1488.17	0.483647	6.48374	8.94788e-11	1.80937e-09
RCEA025137	BX284603	Y40D12A.1	CCD64383.2, CELE_Y40D12A.1, EnsemblGenomes-Gn:WBGene00021502, EnsemblGenomes-Tr:Y40D12A.1a, GI:412979556, GOA:O76726, InterPro:IPR002877, InterPro:IPR025807, InterPro:IPR029063, UniProtKB/TrEMBL:O76726, WormBase:WBGene00021502, Y40D12A.1		3.13531	163.571	0.711009	4.40966	1.03535e-05	6.42462e-05
RCEA018305	BX284602	nos-1	CAA86860.1, CELE_R03D7.7, EnsemblGenomes-Gn:WBGene00003783, EnsemblGenomes-Tr:R03D7.7, GI:3878796, GOA:Q09597, InterPro:IPR024161, nos-1, UniProtKB/TrEMBL:Q09597, WormBase:WBGene00003783		3.12394	248.357	0.784851	3.9803	6.88292e-05	0.000341203
RCEA040564	BX284604	rod-1	CCD69392.1, CELE_F55G1.4, EnsemblGenomes-Gn:WBGene00018900, EnsemblGenomes-Tr:F55G1.4, GI:351061536, GOA:Q20849, rod-1, UniProtKB/TrEMBL:Q20849, WormBase:WBGene00018900	Huntingtin interacting protein 1 related	3.1164	938.93	0.594586	5.2413	1.59447e-07	1.56592e-06
RCEA073873	BX284605	F59B1.10	CCD72124.1, CELE_F59B1.10, EnsemblGenomes-Gn:WBGene00019101, EnsemblGenomes-Tr:F59B1.10, F59B1.10, GI:351063882, InterPro:IPR011009, InterPro:IPR012877, InterPro:IPR015897, UniProtKB/TrEMBL:Q8IA57, WormBase:WBGene00019101		3.11559	84.6347	0.761721	4.0902	4.3101e-05	0.000226149
RCEA028797	BX284603	Y56A3A.16	CCD31150.1, CELE_Y56A3A.16, EnsemblGenomes-Gn:WBGene00013235, EnsemblGenomes-Tr:Y56A3A.16b, GI:345107475, InterPro:IPR025258, UniProtKB/TrEMBL:G2HK09, WormBase:WBGene00013235, Y56A3A.16		3.11492	678.012	0.421806	7.3847	1.52793e-13	5.33538e-12
RCEA005283	BX284601	trt-1	CAB09413.1, CELE_DY3.4, EnsemblGenomes-Gn:WBGene00006618, EnsemblGenomes-Tr:DY3.4a.1, EnsemblGenomes-Tr:DY3.4a.2, GI:3875349, GOA:O45321, InterPro:IPR000477, InterPro:IPR003545, trt-1, UniProtKB/TrEMBL:O45321, WormBase:WBGene00006618		3.11354	140.934	0.65655	4.74228	2.11326e-06	1.56344e-05
RCEA003346	BX284601	C27A12.6	C27A12.6, CCD61203.1, CELE_C27A12.6, EnsemblGenomes-Gn:WBGene00016156, EnsemblGenomes-Tr:C27A12.6, GI:373218524, GOA:O01963, InterPro:IPR002867, InterPro:IPR031127, UniProtKB/TrEMBL:O01963, WormBase:WBGene00016156	ZINC FINGER PROTEIN, C3HC4 TYPE (RING FINGER)	3.10837	397.826	0.667182	4.65895	3.17821e-06	2.25615e-05
RCEA015335	BX284602	T07F8.4	CCD65917.1, CELE_T07F8.4, EnsemblGenomes-Gn:WBGene00020320, EnsemblGenomes-Tr:T07F8.4, GI:351058461, GOA:P91437, InterPro:IPR000949, InterPro:IPR001005, InterPro:IPR009057, T07F8.4, UniProtKB/TrEMBL:P91437, WormBase:WBGene00020320		3.10098	144.888	0.601018	5.15956	2.47537e-07	2.31914e-06
RCEA024421	BX284603	par-3	CDH93175.1, CELE_F54E7.3, EnsemblGenomes-Gn:WBGene00003918, EnsemblGenomes-Tr:F54E7.3i, GI:548931411, InterPro:IPR001478, InterPro:IPR021922, par-3, UniProtKB/TrEMBL:U4PRH0, WormBase:WBGene00003918		3.09811	1211.15	0.486971	6.36199	1.99161e-10	3.7321e-09
RCEA005540	BX284601	gld-4	CAB02138.3, CELE_ZK858.1, EnsemblGenomes-Gn:WBGene00014115, EnsemblGenomes-Tr:ZK858.1, GI:194686198, gld-4, WormBase:WBGene00014115		3.09775	320.476	0.468159	6.61688	3.66855e-11	8.03195e-10
RCEA100616	BX284606	F38E9.1	CCD70819.1, CELE_F38E9.1, EnsemblGenomes-Gn:WBGene00018184, EnsemblGenomes-Tr:F38E9.1, F38E9.1, GI:351062766, GOA:Q20177, InterPro:IPR017946, UniProtKB/TrEMBL:Q20177, WormBase:WBGene00018184		3.09378	240.331	0.601792	5.14094	2.73367e-07	2.53457e-06
RCEA024915	BX284603	C18F10.7	C18F10.7, CCD65204.1, CELE_C18F10.7, EnsemblGenomes-Gn:WBGene00015978, EnsemblGenomes-Tr:C18F10.7a, GI:351050605, InterPro:IPR002110, InterPro:IPR003903, InterPro:IPR020683, InterPro:IPR021832, UniProtKB/TrEMBL:Q18099, WormBase:WBGene00015978	KE03 protein	3.09334	1786.67	0.315159	9.81518	9.68629e-23	1.94824e-20
RCEA012466	BX284602	F19B10.13	CCD69702.1, CELE_F19B10.13, EnsemblGenomes-Gn:WBGene00194713, EnsemblGenomes-Tr:F19B10.13, F19B10.13, GI:351061849, UniProtKB/TrEMBL:C7IVQ9, WormBase:WBGene00194713		3.09178	109.521	0.62607	4.9384	7.87661e-07	6.48927e-06
RCEA079581	BX284605	mre-11	CAA98292.2, CELE_ZC302.1, EnsemblGenomes-Gn:WBGene00003405, EnsemblGenomes-Tr:ZC302.1.1, EnsemblGenomes-Tr:ZC302.1.2, GI:54110880, mre-11, WormBase:WBGene00003405	DNA REPAIR PROTEIN (MRE11/RAD32 FAMILY)	3.08792	466.289	0.620394	4.97736	6.44577e-07	5.44731e-06
RCEA012873	BX284602	Y52E8A.2	CCD62412.1, CELE_Y52E8A.2, EnsemblGenomes-Gn:WBGene00021795, EnsemblGenomes-Tr:Y52E8A.2, GI:351020420, GOA:Q9N3H6, InterPro:IPR001841, InterPro:IPR001965, InterPro:IPR013083, UniProtKB/TrEMBL:Q9N3H6, WormBase:WBGene00021795, Y52E8A.2		3.0871	111.072	0.665328	4.63996	3.4847e-06	2.44724e-05
RCEA034760	BX284604	ZK616.5	CCD71111.1, CELE_ZK616.5, EnsemblGenomes-Gn:WBGene00022775, EnsemblGenomes-Tr:ZK616.5, GI:351063065, UniProtKB/TrEMBL:Q965Z2, WormBase:WBGene00022775, ZK616.5		3.08546	279.364	0.461392	6.68728	2.2736e-11	5.14973e-10
RCEA004278	BX284601	wago-1	CAA95839.1, CELE_R06C7.1, EnsemblGenomes-Gn:WBGene00011061, EnsemblGenomes-Tr:R06C7.1, GI:3878834, wago-1, WormBase:WBGene00011061		3.08148	2712.42	0.371408	8.29676	1.0699e-16	6.98679e-15
RCEA005273	BX284601	C36B1.11	C36B1.11, CAB02276.1, CELE_C36B1.11, EnsemblGenomes-Gn:WBGene00007978, EnsemblGenomes-Tr:C36B1.11, GI:3874783, GOA:Q93345, UniProtKB/TrEMBL:Q93345, WormBase:WBGene00007978		3.0801	327.177	0.641245	4.80332	1.56057e-06	1.19196e-05
RCEA076786	BX284605	C54F6.5	C54F6.5, CCD62987.2, CELE_C54F6.5, EnsemblGenomes-Gn:WBGene00016923, EnsemblGenomes-Tr:C54F6.5, GI:459683813, UniProtKB/TrEMBL:O16447, WormBase:WBGene00016923		3.07722	22.4005	1.24499	2.47169	0.0134476	0.0327698
RCEA013155	BX284602	F26G1.1	CCD65845.1, CELE_F26G1.1, EnsemblGenomes-Gn:WBGene00017837, EnsemblGenomes-Tr:F26G1.1, F26G1.1, GI:351058403, InterPro:IPR029705, UniProtKB/TrEMBL:Q19833, WormBase:WBGene00017837		3.07619	511.195	0.51921	5.92475	3.1277e-09	4.47641e-08
RCEA076495	BX284605	F09G2.8	CCD64430.1, CELE_F09G2.8, EnsemblGenomes-Gn:WBGene00017316, EnsemblGenomes-Tr:F09G2.8b, F09G2.8, GI:351057820, WormBase:WBGene00017316		3.07129	394.861	0.570288	5.38551	7.22398e-08	7.62587e-07
RCEA100107	BX284606	K09A9.8	CBI63228.1, CELE_K09A9.8, EnsemblGenomes-Gn:WBGene00194849, EnsemblGenomes-Tr:K09A9.8, GI:269993287, K09A9.8, UniProtKB/TrEMBL:D1MN81, WormBase:WBGene00194849		3.07065	22.1806	1.2552	2.44635	0.0144312	0.0347754
RCEA023039	BX284603	C14B1.2	C14B1.2, CAA85485.1, CELE_C14B1.2, EnsemblGenomes-Gn:WBGene00007573, EnsemblGenomes-Tr:C14B1.2, GI:3874288, GOA:Q17961, UniProtKB/TrEMBL:Q17961, WormBase:WBGene00007573		3.0701	568.876	0.491846	6.24199	4.32028e-10	7.46522e-09
RCEA029145	BX284603	sas-1	CAC35853.2, CELE_Y111B2A.24, EnsemblGenomes-Gn:WBGene00013742, EnsemblGenomes-Tr:Y111B2A.24, GI:224490111, GOA:Q9BHL0, InterPro:IPR000008, sas-1, UniProtKB/TrEMBL:Q9BHL0, WormBase:WBGene00013742		3.06928	494.099	0.53368	5.75117	8.86293e-09	1.16868e-07
RCEA044180	BX284604	kin-4	CCG28211.1, CELE_C10C6.1, GI:379657266, GOA:H9G328, InterPro:IPR000719, InterPro:IPR001478, InterPro:IPR002290, InterPro:IPR008271, InterPro:IPR011009, InterPro:IPR015022, InterPro:IPR023142, kin-4, UniProtKB/TrEMBL:H9G328, WormBase:WBGene00002192		3.06675	1006.76	0.500297	6.12987	8.79525e-10	1.43901e-08
RCEA005074	BX284601	D1081.7	CAN99690.1, CELE_D1081.7, D1081.7, EnsemblGenomes-Gn:WBGene00008385, EnsemblGenomes-Tr:D1081.7b, GI:148879299, InterPro:IPR025605, UniProtKB/TrEMBL:A5Z2T6, WormBase:WBGene00008385		3.06378	1263.54	0.516408	5.93286	2.97696e-09	4.26877e-08
RCEA003708	BX284601	knl-2	CCD68114.1, CELE_K06A5.4, EnsemblGenomes-Gn:WBGene00019432, EnsemblGenomes-Tr:K06A5.4, GI:351060447, GOA:O44548, InterPro:IPR015216, knl-2, PDB:2M3A, UniProtKB/TrEMBL:O44548, WormBase:WBGene00019432		3.06043	507.48	0.536093	5.70876	1.13802e-08	1.46103e-07
RCEA014752	BX284602	toe-2	CCD68202.1, CELE_C56E6.3, EnsemblGenomes-Gn:WBGene00016971, EnsemblGenomes-Tr:C56E6.3a, GI:373219469, GOA:H2KZH5, InterPro:IPR000591, toe-2, UniProtKB/TrEMBL:H2KZH5, WormBase:WBGene00016971		3.05763	384.942	0.549704	5.56232	2.66205e-08	3.12506e-07
RCEA019905	BX284602	rict-1	CBX53320.1, CELE_F29C12.3, GI:313004741, GOA:G5EFN2, InterPro:IPR016024, InterPro:IPR028267, InterPro:IPR028268, InterPro:IPR029451, InterPro:IPR029452, InterPro:IPR029453, rict-1, UniProtKB/TrEMBL:G5EFN2, WormBase:WBGene00009245		3.05615	733.55	0.489076	6.24881	4.13584e-10	7.16293e-09
RCEA026805	BX284603	ZK637.6	CELE_ZK637.6, ZK637.6		3.05426	49.2929	0.791087	3.86084	0.000112998	0.000525942
RCEA073697	BX284605	T20D4.7	CCD62937.1, CELE_T20D4.7, EnsemblGenomes-Gn:WBGene00020613, EnsemblGenomes-Tr:T20D4.7, GI:351020945, InterPro:IPR012336, T20D4.7, UniProtKB/TrEMBL:P91468, WormBase:WBGene00020613	Thiol-disulfide isomerase and thioredoxins	3.05255	139.42	0.698033	4.37308	1.22507e-05	7.44569e-05
RCEA019254	BX284602	ippk-1	CAA19460.2, CELE_Y17G7B.13, EnsemblGenomes-Gn:WBGene00012466, EnsemblGenomes-Tr:Y17G7B.13, GI:211970665, GOA:Q9XXI1, InterPro:IPR009286, ippk-1, UniProtKB/TrEMBL:Q9XXI1, WormBase:WBGene00012466		3.04859	453.294	0.385065	7.91709	2.43137e-15	1.18696e-13
RCEA092707	BX284606	inx-3	CCD63822.1, CELE_F22F4.2, EnsemblGenomes-Gn:WBGene00002125, EnsemblGenomes-Tr:F22F4.2, GI:351049769, inx-3, WormBase:WBGene00002125	Gap junction-forming innexin protein	3.04801	222.718	0.838039	3.63708	0.000275751	0.00114246
RCEA007690	BX284601	Y53C10A.1	CELE_Y53C10A.1, Y53C10A.1		3.04303	35.7735	1.03978	2.92662	0.00342666	0.0102379
RCEA022779	BX284603	Y53G8AL.1	CCD72295.1, CELE_Y53G8AL.1, EnsemblGenomes-Gn:WBGene00021799, EnsemblGenomes-Tr:Y53G8AL.1, GI:373220130, InterPro:IPR000253, InterPro:IPR008984, UniProtKB/TrEMBL:Q9N3H4, WormBase:WBGene00021799, Y53G8AL.1		3.04136	54.7185	0.960161	3.16755	0.00153732	0.00511703
RCEA023317	BX284603	hrde-1	CAA86741.1, CELE_C16C10.3, EnsemblGenomes-Gn:WBGene00007624, EnsemblGenomes-Tr:C16C10.3, GI:3874381, hrde-1, WormBase:WBGene00007624		3.04055	1937.8	0.446167	6.81482	9.43791e-12	2.33778e-10
RCEA019291	BX284602	Y57A10A.5	CAB55010.1, CELE_Y57A10A.5, EnsemblGenomes-Gn:WBGene00013250, EnsemblGenomes-Tr:Y57A10A.5, GI:5832922, InterPro:IPR006570, UniProtKB/TrEMBL:Q9NA87, WormBase:WBGene00013250, Y57A10A.5		3.03593	67.4114	0.954359	3.18111	0.0014671	0.00491368
RCEA085195	BX284605	syp-1	CAB04186.2, CELE_F26D2.2, EnsemblGenomes-Gn:WBGene00006375, EnsemblGenomes-Tr:F26D2.2, GI:30425634, GOA:G5EGS8, syp-1, UniProtKB/TrEMBL:G5EGS8, WormBase:WBGene00006375		3.03112	180.826	0.617149	4.91149	9.03869e-07	7.33058e-06
RCEA081944	BX284605	C44H9.5	C44H9.5, CAA99787.2, CELE_C44H9.5, EnsemblGenomes-Gn:WBGene00008100, EnsemblGenomes-Tr:C44H9.5, GI:313004707, GOA:Q18634, UniProtKB/TrEMBL:Q18634, WormBase:WBGene00008100		3.03108	114.592	0.656425	4.61755	3.88299e-06	2.69806e-05
RCEA099190	BX284606	gfi-3	CAB01894.1, CELE_M163.4, EnsemblGenomes-Gn:WBGene00001583, EnsemblGenomes-Tr:M163.4, gfi-3, GI:3878757, InterPro:IPR011990, InterPro:IPR019734, UniProtKB/TrEMBL:Q93903, WormBase:WBGene00001583		3.0305	201.322	0.429757	7.05165	1.76807e-12	4.93002e-11
RCEA005300	BX284601	sup-17	CAB09416.1, CELE_DY3.7, EnsemblGenomes-Gn:WBGene00006324, EnsemblGenomes-Tr:DY3.7, GI:3875352, GOA:G5EFD9, InterPro:IPR001590, InterPro:IPR001762, InterPro:IPR002870, InterPro:IPR024079, InterPro:IPR027053, sup-17, UniProtKB/TrEMBL:G5EFD9, WormBase:WBGene00006324		3.028	729.827	0.391974	7.72501	1.11845e-14	4.93329e-13
RCEA074232	BX284605	Y45G5AM.2	CCD74321.1, CELE_Y45G5AM.2, EnsemblGenomes-Gn:WBGene00021555, EnsemblGenomes-Tr:Y45G5AM.2, GI:351051221, GOA:Q9GUI6, InterPro:IPR000587, InterPro:IPR000994, InterPro:IPR029149, InterPro:IPR032416, UniProtKB/TrEMBL:Q9GUI6, WormBase:WBGene00021555, Y45G5AM.2		3.02675	191.79	0.503307	6.01373	1.81305e-09	2.72953e-08
RCEA025646	BX284603	F56C9.3	CCD61829.1, CELE_F56C9.3, EnsemblGenomes-Gn:WBGene00018948, EnsemblGenomes-Tr:F56C9.3, F56C9.3, GI:351065842, GOA:Q20864, InterPro:IPR002524, InterPro:IPR027469, InterPro:IPR027470, UniProtKB/TrEMBL:Q20864, WormBase:WBGene00018948	Permease	3.01744	439.347	0.404549	7.45878	8.73261e-14	3.25263e-12
RCEA041600	BX284604	F21D5.6	CAA91036.1, CELE_F21D5.6, EnsemblGenomes-Gn:WBGene00009011, EnsemblGenomes-Tr:F21D5.6, F21D5.6, GI:3876107, GOA:Q19684, InterPro:IPR019024, UniProtKB/TrEMBL:Q19684, WormBase:WBGene00009011		3.01463	526.394	0.467924	6.44257	1.1747e-10	2.30434e-09
RCEA005275	BX284601	DY3.8	CAH04703.1, CELE_DY3.8, DY3.8, EnsemblGenomes-Gn:WBGene00008440, EnsemblGenomes-Tr:DY3.8, GI:50507811, GOA:G5EGC1, UniProtKB/TrEMBL:G5EGC1, WormBase:WBGene00008440		3.01381	227.617	0.617321	4.88208	1.04972e-06	8.40498e-06
RCEA023636	BX284603	wdr-48	CAQ58416.1, CELE_F35G12.4, EnsemblGenomes-Gn:WBGene00009441, EnsemblGenomes-Tr:F35G12.4a, GI:189406575, wdr-48, WormBase:WBGene00009441		3.01152	311.742	0.52592	5.7262	1.02706e-08	1.33218e-07
RCEA084001	BX284605	bath-36	bath-36, CAA21761.1, CELE_Y75B12B.4, EnsemblGenomes-Gn:WBGene00013569, EnsemblGenomes-Tr:Y75B12B.4, GI:3881311, WormBase:WBGene00013569		3.00999	30.2613	1.1953	2.5182	0.0117958	0.0293921
RCEA083340	BX284605	coh-3	CAB01150.2, CELE_F08H9.1, coh-3, EnsemblGenomes-Gn:WBGene00000592, EnsemblGenomes-Tr:F08H9.1, GI:37619836, GOA:Q19232, InterPro:IPR006909, InterPro:IPR023093, UniProtKB/TrEMBL:Q19232, WormBase:WBGene00000592		3.00795	256.077	0.536635	5.6052	2.08015e-08	2.51033e-07
RCEA060270	BX284604	Y105C5A.8	CAJ76959.1, CELE_Y105C5A.8, EnsemblGenomes-Gn:WBGene00013633, EnsemblGenomes-Tr:Y105C5A.8a, GI:87251750, UniProtKB/TrEMBL:Q2HQL2, WormBase:WBGene00013633, Y105C5A.8		3.003	220.767	0.453984	6.61479	3.72092e-11	8.12301e-10
RCEA085984	BX284605	F31E9.6	CAB54232.2, CELE_F31E9.6, EnsemblGenomes-Gn:WBGene00009299, EnsemblGenomes-Tr:F31E9.6, F31E9.6, GI:6435505, UniProtKB/TrEMBL:G5EBI2, WormBase:WBGene00009299		3.00298	32.9176	1.20839	2.4851	0.0129514	0.0317059
RCEA012216	BX284602	bath-29	bath-29, CCD69483.1, CELE_F14D2.4, EnsemblGenomes-Gn:WBGene00017452, EnsemblGenomes-Tr:F14D2.4a, GI:351061637, InterPro:IPR000210, InterPro:IPR002083, InterPro:IPR008974, InterPro:IPR011333, UniProtKB/TrEMBL:O44805, WormBase:WBGene00017452		2.99977	175.557	0.680813	4.40616	1.0522e-05	6.50776e-05
RCEA023062	BX284603	evl-18	CAA84320.2, CELE_F34D10.2, EnsemblGenomes-Gn:WBGene00009372, EnsemblGenomes-Tr:F34D10.2, evl-18, GI:154147244, GOA:Q7JMR0, InterPro:IPR003874, UniProtKB/TrEMBL:Q7JMR0, WormBase:WBGene00009372	Cell division control protein 45	2.99833	390.256	0.435259	6.88862	5.63357e-12	1.43794e-10
RCEA088506	BX284606	Y73B3A.1	CCD74427.2, CELE_Y73B3A.1, EnsemblGenomes-Gn:WBGene00022203, EnsemblGenomes-Tr:Y73B3A.1, GI:563403644, UniProtKB/TrEMBL:Q95XE2, WormBase:WBGene00022203, Y73B3A.1		2.99703	750.064	0.471762	6.35285	2.11365e-10	3.92182e-09
RCEA004645	BX284601	gras-1	CAB03034.2, CELE_F30F8.3, EnsemblGenomes-Gn:WBGene00009272, EnsemblGenomes-Tr:F30F8.3, GI:14530442, gras-1, InterPro:IPR001478, UniProtKB/TrEMBL:Q93654, WormBase:WBGene00009272		2.99361	515.522	0.506407	5.91147	3.3907e-09	4.81626e-08
RCEA092952	BX284606	hsp-43	CCD64545.2, CELE_C14F11.5, EnsemblGenomes-Gn:WBGene00002024, EnsemblGenomes-Tr:C14F11.5b, GI:371566239, hsp-43, InterPro:IPR001436, InterPro:IPR002068, InterPro:IPR008978, InterPro:IPR031107, UniProtKB/TrEMBL:B0M0L8, WormBase:WBGene00002024		2.9936	2212.01	0.547086	5.4719	4.45225e-08	4.92391e-07
RCEA022546	BX284603	cosa-1	CCD73879.1, CELE_Y71H2AM.7, cosa-1, EnsemblGenomes-Gn:WBGene00022172, EnsemblGenomes-Tr:Y71H2AM.7, GI:373220613, GOA:Q9BL45, InterPro:IPR013763, UniProtKB/TrEMBL:Q9BL45, WormBase:WBGene00022172		2.99345	44.8653	0.795739	3.76185	0.000168659	0.000745232
RCEA043530	BX284604	orc-5	CAA94386.2, CELE_ZC168.3, GI:34555839, GOA:Q23249, InterPro:IPR020796, InterPro:IPR027417, orc-5, UniProtKB/TrEMBL:Q23249, WormBase:WBGene00013857		2.99207	340.503	0.501247	5.96924	2.38357e-09	3.5045e-08
RCEA096023	BX284606	oac-14	CAA90058.1, CELE_F09B9.1, EnsemblGenomes-Gn:WBGene00008602, EnsemblGenomes-Tr:F09B9.1, GI:3875562, GOA:Q19239, InterPro:IPR002656, InterPro:IPR006621, oac-14, UniProtKB/TrEMBL:Q19239, WormBase:WBGene00008602	putative acyltransferases	2.99022	635.552	0.741039	4.03518	5.45612e-05	0.000277778
RCEA001877	BX284601	glh-4	CCD69784.1, CELE_T12F5.3, EnsemblGenomes-Gn:WBGene00001601, EnsemblGenomes-Tr:T12F5.3.1, EnsemblGenomes-Tr:T12F5.3.2, GI:373219730, glh-4, WormBase:WBGene00001601		2.98633	469.441	0.527566	5.66057	1.50867e-08	1.88552e-07
RCEA002303	BX284601	cmt-1	CCD64254.1, CELE_C41D11.5, cmt-1, EnsemblGenomes-Gn:WBGene00016564, EnsemblGenomes-Tr:C41D11.5, GI:373253974, WormBase:WBGene00016564		2.985	483.82	0.458586	6.50915	7.55749e-11	1.54269e-09
RCEA040818	BX284604	hcf-1	CCD66593.1, CELE_C46A5.9, EnsemblGenomes-Gn:WBGene00001827, EnsemblGenomes-Tr:C46A5.9, GI:351058819, GOA:G5EC23, hcf-1, InterPro:IPR003961, InterPro:IPR013783, InterPro:IPR015915, InterPro:IPR015916, UniProtKB/TrEMBL:G5EC23, WormBase:WBGene00001827		2.97891	1055.51	0.345563	8.62045	6.66926e-18	5.43815e-16
RCEA083806	BX284605	T01C3.9	CAB01662.1, CELE_T01C3.9, EnsemblGenomes-Gn:WBGene00011324, EnsemblGenomes-Tr:T01C3.9, GI:3879249, T01C3.9, UniProtKB/TrEMBL:Q22058, WormBase:WBGene00011324		2.97731	422.386	0.422583	7.04549	1.84808e-12	5.1436e-11
RCEA005838	BX284601	usp-48	CAB03026.2, CELE_F30A10.10, EnsemblGenomes-Gn:WBGene00009267, EnsemblGenomes-Tr:F30A10.10, GI:25809230, GOA:G5ECC7, InterPro:IPR001394, InterPro:IPR018200, InterPro:IPR028889, UniProtKB/TrEMBL:G5ECC7, usp-48, WormBase:WBGene00009267		2.97562	652.89	0.60068	4.95375	7.27953e-07	6.06694e-06
RCEA013920	BX284602	zyg-1	CCD64966.1, CELE_F59E12.2, EnsemblGenomes-Gn:WBGene00006988, EnsemblGenomes-Tr:F59E12.2.1, EnsemblGenomes-Tr:F59E12.2.2, GI:351050423, WormBase:WBGene00006988, zyg-1		2.97113	178.821	0.517212	5.74452	9.2182e-09	1.20709e-07
RCEA025532	BX284603	epg-4	CCD70735.1, CELE_F37C12.2, EnsemblGenomes-Gn:WBGene00018150, EnsemblGenomes-Tr:F37C12.2.1, EnsemblGenomes-Tr:F37C12.2.2, EnsemblGenomes-Tr:F37C12.2.3, epg-4, GI:351062700, WormBase:WBGene00018150		2.97078	295.785	0.524733	5.6615	1.50054e-08	1.87692e-07
RCEA018814	BX284602	Y62F5A.12	CAP46783.1, CELE_Y62F5A.12, EnsemblGenomes-Gn:WBGene00077453, EnsemblGenomes-Tr:Y62F5A.12, GI:161353322, UniProtKB/TrEMBL:A9IHM9, WormBase:WBGene00077453, Y62F5A.12		2.97014	144.701	0.572296	5.18987	2.10443e-07	2.00543e-06
RCEA100285	BX284606	F53H4.2	CAB03134.2, CELE_F53H4.2, EnsemblGenomes-Gn:WBGene00010007, EnsemblGenomes-Tr:F53H4.2.1, EnsemblGenomes-Tr:F53H4.2.2, F53H4.2, GI:154147306, UniProtKB/TrEMBL:Q93778, WormBase:WBGene00010007		2.9697	1359.61	0.693081	4.28479	1.82915e-05	0.000106865
RCEA090171	BX284606	tsp-6	CCD63474.1, CELE_C14A11.1, EnsemblGenomes-Gn:WBGene00006632, EnsemblGenomes-Tr:C14A11.1, GI:459683812, GOA:G4RWX0, InterPro:IPR000301, InterPro:IPR008952, InterPro:IPR018499, InterPro:IPR018503, tsp-6, UniProtKB/TrEMBL:G4RWX0, WormBase:WBGene00006632		2.96733	26.7995	0.966455	3.07032	0.0021383	0.00681807
RCEA081252	BX284605	usip-1	CAB01456.1, CELE_ZK863.4, EnsemblGenomes-Gn:WBGene00014124, EnsemblGenomes-Tr:ZK863.4.1, EnsemblGenomes-Tr:ZK863.4.2, GI:3881838, GOA:Q23652, InterPro:IPR002058, UniProtKB/TrEMBL:Q23652, usip-1, WormBase:WBGene00014124		2.96643	1266.49	0.41112	7.21548	5.37458e-13	1.65799e-11
RCEA074340	BX284605	F32D1.7	CCD68487.1, CELE_F32D1.7, EnsemblGenomes-Gn:WBGene00017986, EnsemblGenomes-Tr:F32D1.7, F32D1.7, GI:351060747, UniProtKB/TrEMBL:O16291, WormBase:WBGene00017986		2.96394	644.311	0.700166	4.2332	2.30388e-05	0.000130312
RCEA003802	BX284601	mei-2	CCD71480.1, CELE_F57B10.12, EnsemblGenomes-Gn:WBGene00003184, EnsemblGenomes-Tr:F57B10.12, GI:351063322, mei-2, WormBase:WBGene00003184		2.96105	894.084	0.449995	6.58017	4.69899e-11	1.00403e-09
RCEA079888	BX284605	C13G3.1	C13G3.1, CAA98421.1, CELE_C13G3.1, EnsemblGenomes-Gn:WBGene00007553, EnsemblGenomes-Tr:C13G3.1, GI:3874265, UniProtKB/TrEMBL:Q17947, WormBase:WBGene00007553		2.95906	56.0534	0.984643	3.00521	0.002654	0.00822594
RCEA023788	BX284603	rbg-3	CAA86055.1, CELE_B0393.2, EnsemblGenomes-Gn:WBGene00007167, EnsemblGenomes-Tr:B0393.2.1, EnsemblGenomes-Tr:B0393.2.2, GI:3873735, GOA:Q17491, InterPro:IPR000195, rbg-3, UniProtKB/TrEMBL:Q17491, WormBase:WBGene00007167	Serine/threonine protein kinase PSK1 (EC 2.7.11.1)	2.95823	790.847	0.606784	4.87526	1.08664e-06	8.65925e-06
RCEA006785	BX284601	B0511.12	B0511.12, CCD62115.1, CELE_B0511.12, EnsemblGenomes-Gn:WBGene00015237, EnsemblGenomes-Tr:B0511.12a, GI:351018217, GOA:G4RT15, InterPro:IPR007735, UniProtKB/TrEMBL:G4RT15, WormBase:WBGene00015237	Pecanex protein	2.95794	1117.98	0.399723	7.39999	1.36199e-13	4.84567e-12
RCEA018896	BX284602	D1043.1	CAB16919.2, CELE_D1043.1, D1043.1, EnsemblGenomes-Gn:WBGene00008361, EnsemblGenomes-Tr:D1043.1, GI:26985842, InterPro:IPR011989, InterPro:IPR016024, UniProtKB/TrEMBL:G5EDW9, WormBase:WBGene00008361		2.95637	440.663	0.499806	5.91504	3.31793e-09	4.71733e-08
RCEA085121	BX284605	oac-7	CAB05690.3, CELE_C31A11.7, EnsemblGenomes-Gn:WBGene00007835, EnsemblGenomes-Tr:C31A11.7, GI:198446546, GOA:O45283, InterPro:IPR002656, InterPro:IPR006621, oac-7, UniProtKB/TrEMBL:O45283, WormBase:WBGene00007835	putative acyltransferases	2.95437	32.8572	1.14241	2.58609	0.00970709	0.0249883
RCEA041332	BX284604	sqv-1	CCD68509.1, CELE_D2096.4, GI:351060773, GOA:G5EF65, InterPro:IPR016040, sqv-1, UniProtKB/TrEMBL:G5EF65, WormBase:WBGene00005019	UDP-D-glucuronate carboxy-lyase (EC 4.1.1.35)	2.95252	756.917	0.534552	5.52336	3.32583e-08	3.79789e-07
RCEA099113	BX284606	irk-3	CAB01762.3, CELE_K04G11.5, EnsemblGenomes-Gn:WBGene00002151, EnsemblGenomes-Tr:K04G11.5, GI:34555948, GOA:Q93849, InterPro:IPR013518, InterPro:IPR014756, InterPro:IPR016449, irk-3, UniProtKB/TrEMBL:Q93849, WormBase:WBGene00002151	Inward rectifier potassium channel	2.95155	32.4791	1.11099	2.65667	0.00789159	0.0208631
RCEA004046	BX284601	C48B6.3	C48B6.3, CCD67580.1, CELE_C48B6.3, EnsemblGenomes-Gn:WBGene00016741, EnsemblGenomes-Tr:C48B6.3, GI:373219371, InterPro:IPR029196, UniProtKB/TrEMBL:O01512, WormBase:WBGene00016741		2.95053	442.648	0.357643	8.24995	1.58462e-16	9.79669e-15
RCEA076393	BX284605	mys-1	CCD70078.1, CELE_VC5.4, EnsemblGenomes-Gn:WBGene00007029, EnsemblGenomes-Tr:VC5.4.1, EnsemblGenomes-Tr:VC5.4.2, GI:351062161, mys-1, WormBase:WBGene00007029	histone acetyltransferase MYST3 (EC 2.3.1.48)	2.93969	336.538	0.492267	5.97173	2.34755e-09	3.46505e-08
RCEA015487	BX284602	haf-2	CCD63543.1, CELE_F43E2.4, EnsemblGenomes-Gn:WBGene00001812, EnsemblGenomes-Tr:F43E2.4, GI:351021276, GOA:O02086, haf-2, InterPro:IPR003439, InterPro:IPR003593, InterPro:IPR011527, InterPro:IPR013305, InterPro:IPR017871, InterPro:IPR027417, UniProtKB/TrEMBL:O02086, WormBase:WBGene00001812	Multidrug/protein/lipid ABC transporter family, ATP-binding and permease protein	2.93898	1387.8	0.387578	7.58294	3.37824e-14	1.3736e-12
RCEA011194	BX284602	bath-21	bath-21, CCD61288.1, CELE_F59H6.8, EnsemblGenomes-Gn:WBGene00019138, EnsemblGenomes-Tr:F59H6.8, GI:351065311, InterPro:IPR000210, InterPro:IPR002083, InterPro:IPR008974, InterPro:IPR011333, UniProtKB/TrEMBL:Q9N5Q1, WormBase:WBGene00019138		2.9367	20.6415	1.18841	2.47111	0.0134694	0.0328143
RCEA081327	BX284605	rad-50	CAN86608.1, CELE_T04H1.4, GI:148472886, GOA:A5JYU5, InterPro:IPR004584, InterPro:IPR013134, InterPro:IPR027417, rad-50, UniProtKB/TrEMBL:A5JYU5, WormBase:WBGene00004296	DNA repair protein RAD50	2.93606	294.744	0.602108	4.8763	1.08096e-06	8.61853e-06
RCEA027890	BX284603	pad-2	CCC42186.1, CELE_K10G9.3, EnsemblGenomes-Gn:WBGene00010757, EnsemblGenomes-Tr:K10G9.3b, GI:339730623, GOA:G1K0W1, InterPro:IPR019378, pad-2, UniProtKB/TrEMBL:G1K0W1, WormBase:WBGene00010757	Protein C21orf80 homolog	2.932	59.4305	0.701295	4.18083	2.90448e-05	0.00015944
RCEA010512	BX284602	eri-3	CCD73651.1, CELE_W09B6.3, EnsemblGenomes-Gn:WBGene00021103, EnsemblGenomes-Tr:W09B6.3, eri-3, GI:351059363, UniProtKB/TrEMBL:Q9GZI7, WormBase:WBGene00021103		2.93061	183.228	0.546197	5.36547	8.07377e-08	8.43441e-07
RCEA030233	BX284604	Y55F3BR.10	CCD67297.1, CELE_Y55F3BR.10, EnsemblGenomes-Gn:WBGene00044742, EnsemblGenomes-Tr:Y55F3BR.10, GI:351059703, UniProtKB/TrEMBL:A0A9S0, WormBase:WBGene00044742, Y55F3BR.10		2.92627	18.0552	1.18186	2.476	0.0132864	0.0324261
RCEA011532	BX284602	K02F6.7	CCD70876.1, CELE_K02F6.7, EnsemblGenomes-Gn:WBGene00019341, EnsemblGenomes-Tr:K02F6.7, GI:351062833, K02F6.7, UniProtKB/TrEMBL:O16628, WormBase:WBGene00019341		2.92461	187.148	0.769949	3.79844	0.000145608	0.000654889
RCEA020695	BX284602	btb-19	btb-19, CAB05524.1, CELE_F57C2.2, EnsemblGenomes-Gn:WBGene00010194, EnsemblGenomes-Tr:F57C2.2, GI:3877785, InterPro:IPR000210, InterPro:IPR011333, UniProtKB/TrEMBL:O45594, WormBase:WBGene00010194		2.92362	172.572	0.649129	4.50392	6.67125e-06	4.36884e-05
RCEA075482	BX284605	picc-1	CCD64130.1, CELE_F29G9.2, EnsemblGenomes-Gn:WBGene00017931, EnsemblGenomes-Tr:F29G9.2a, GI:351050052, GOA:H2KYP0, InterPro:IPR019359, picc-1, UniProtKB/Swiss-Prot:H2KYP0, WormBase:WBGene00017931		2.92068	671.471	0.651087	4.48585	7.26225e-06	4.69571e-05
RCEA072058	BX284605	tank-1	CCD69563.1, CELE_ZK1005.1, GI:351061722, tank-1, WormBase:WBGene00004053	Glycogenin glucosyltransferase (EC 2.4.1.186)	2.91998	1322.3	0.365231	7.99486	1.29717e-15	6.65574e-14
RCEA000214	BX284601	Y65B4BL.4	CCD73490.1, CELE_Y65B4BL.4, EnsemblGenomes-Gn:WBGene00022036, EnsemblGenomes-Tr:Y65B4BL.4, GI:351051106, GOA:Q9N304, UniProtKB/TrEMBL:Q9N304, WormBase:WBGene00022036, Y65B4BL.4	Hypothetical protein	2.9186	307.918	0.657845	4.4366	9.13902e-06	5.7707e-05
RCEA024128	BX284603	pup-2	CCD72857.1, CELE_K10D2.2, EnsemblGenomes-Gn:WBGene00019628, EnsemblGenomes-Tr:K10D2.2, GI:351064472, GOA:Q09408, InterPro:IPR002058, pup-2, UniProtKB/TrEMBL:Q09408, WormBase:WBGene00019628		2.91694	1411.46	0.39117	7.45696	8.85405e-14	3.28974e-12
RCEA015462	BX284602	brf-1	brf-1, CCD66264.1, CELE_F45E12.2, EnsemblGenomes-Gn:WBGene00000271, EnsemblGenomes-Tr:F45E12.2, GI:351065110, GOA:Q20429, InterPro:IPR000812, InterPro:IPR011665, InterPro:IPR013137, InterPro:IPR013150, InterPro:IPR013763, InterPro:IPR029529, UniProtKB/TrEMBL:Q20429, WormBase:WBGene00000271		2.91292	237.575	0.501992	5.80271	6.52498e-09	8.77267e-08
RCEA005892	BX284601	swah-1	CAB02814.2, CELE_C36F7.2, EnsemblGenomes-Gn:WBGene00007985, EnsemblGenomes-Tr:C36F7.2.1, EnsemblGenomes-Tr:C36F7.2.2, GI:6434271, InterPro:IPR002110, InterPro:IPR020683, swah-1, UniProtKB/TrEMBL:Q93349, WormBase:WBGene00007985		2.91255	200.559	0.661583	4.40239	1.07064e-05	6.61366e-05
RCEA000010	BX284601	rcor-1	CCD68265.1, CELE_Y74C9A.4, GI:373219508, GOA:Q95Y41, InterPro:IPR000679, InterPro:IPR000949, InterPro:IPR001005, InterPro:IPR009057, InterPro:IPR017884, rcor-1, UniProtKB/TrEMBL:Q95Y41, WormBase:WBGene00022278	Metastasis-associated protein MTA1	2.912	361.155	0.642951	4.52911	5.92313e-06	3.93614e-05
RCEA044839	BX284604	F11A10.5	CAA92595.1, CELE_F11A10.5, EnsemblGenomes-Gn:WBGene00008686, EnsemblGenomes-Tr:F11A10.5, F11A10.5, GI:3875772, WormBase:WBGene00008686		2.91112	706.935	0.467077	6.23263	4.58675e-10	7.89853e-09
RCEA003351	BX284601	C27A12.7	C27A12.7, CCD61204.1, CELE_C27A12.7, GI:373218525, GOA:O01964, InterPro:IPR002867, InterPro:IPR031127, UniProtKB/TrEMBL:O01964, WormBase:WBGene00016157		2.91079	507.432	0.438883	6.63226	3.30596e-11	7.28035e-10
RCEA026201	BX284603	bath-42	bath-42, CCD66124.1, CELE_C50C3.8, EnsemblGenomes-Gn:WBGene00016803, EnsemblGenomes-Tr:C50C3.8, GI:351058630, WormBase:WBGene00016803		2.90633	1685.71	0.40677	7.1449	9.00635e-13	2.71179e-11
RCEA027964	BX284603	M03C11.3	CCF23353.1, CELE_M03C11.3, EnsemblGenomes-Gn:WBGene00010840, EnsemblGenomes-Tr:M03C11.3b, GI:371570794, M03C11.3, UniProtKB/TrEMBL:H2FLG5, WormBase:WBGene00010840		2.90389	524.395	0.620607	4.67911	2.88125e-06	2.06282e-05
RCEA081330	BX284605	T04H1.5	CAB01582.1, CELE_T04H1.5, EnsemblGenomes-Gn:WBGene00011451, EnsemblGenomes-Tr:T04H1.5, GI:3879426, GOA:Q22178, InterPro:IPR000467, InterPro:IPR007087, InterPro:IPR025239, T04H1.5, UniProtKB/TrEMBL:Q22178, WormBase:WBGene00011451		2.89989	264.737	0.496957	5.8353	5.36955e-09	7.34357e-08
RCEA099054	BX284606	E02H4.6	CAA91980.1, CELE_E02H4.6, E02H4.6, EnsemblGenomes-Gn:WBGene00008464, EnsemblGenomes-Tr:E02H4.6, GI:3875440, GOA:G5EFL7, InterPro:IPR000719, InterPro:IPR008271, InterPro:IPR011009, UniProtKB/TrEMBL:G5EFL7, WormBase:WBGene00008464		2.89757	48.5848	1.06826	2.71242	0.00667933	0.0181186
RCEA002172	BX284601	swsn-2.2	CCD65137.1, CELE_C18E3.2, EnsemblGenomes-Gn:WBGene00015971, EnsemblGenomes-Tr:C18E3.2.1, EnsemblGenomes-Tr:C18E3.2.2, GI:351050534, GOA:O02101, InterPro:IPR003121, InterPro:IPR019835, swsn-2.2, UniProtKB/TrEMBL:O02101, WormBase:WBGene00015971		2.89707	846.428	0.369369	7.8433	4.38858e-15	2.04326e-13
RCEA017190	BX284602	Y51B9A.8	CAA19536.1, CELE_Y51B9A.8, EnsemblGenomes-Gn:WBGene00013090, EnsemblGenomes-Tr:Y51B9A.8, GI:3881065, InterPro:IPR003582, InterPro:IPR007026, UniProtKB/TrEMBL:Q9XXC6, WormBase:WBGene00013090, Y51B9A.8		2.89646	70.4892	1.0328	2.80448	0.0050398	0.0143201
RCEA016025	BX284602	ZK669.3	CAA85464.1, CELE_ZK669.3, EnsemblGenomes-Gn:WBGene00014053, EnsemblGenomes-Tr:ZK669.3, GI:3881756, WormBase:WBGene00014053, ZK669.3		2.89436	90.6898	0.897876	3.22357	0.00126605	0.0043131
RCEA099145	BX284606	F23D12.11	CAZ65487.1, CELE_F23D12.11, EnsemblGenomes-Gn:WBGene00194674, EnsemblGenomes-Tr:F23D12.11, F23D12.11, GI:242319816, UniProtKB/TrEMBL:C6KRL2, WormBase:WBGene00194674		2.89317	870.461	0.793068	3.64808	0.000264209	0.00110039
RCEA001754	BX284601	msh-6	CCD72556.1, CELE_Y47G6A.11, EnsemblGenomes-Gn:WBGene00003422, EnsemblGenomes-Tr:Y47G6A.11, GI:373220156, GOA:Q9N3T8, InterPro:IPR000432, InterPro:IPR007695, InterPro:IPR007696, InterPro:IPR007860, InterPro:IPR007861, InterPro:IPR016151, InterPro:IPR027417, msh-6, UniProtKB/TrEMBL:Q9N3T8, WormBase:WBGene00003422	DNA mismatch repair protein Msh6	2.89174	544.165	0.511635	5.65196	1.58627e-08	1.9727e-07
RCEA032402	BX284604	fbxb-75	CCD73096.1, CELE_R08C7.13, EnsemblGenomes-Gn:WBGene00019956, EnsemblGenomes-Tr:R08C7.13, fbxb-75, GI:351064588, InterPro:IPR001810, InterPro:IPR012885, UniProtKB/TrEMBL:Q86MH2, WormBase:WBGene00019956		2.8887	12.2298	1.24638	2.31767	0.020467	0.0466312
RCEA019283	BX284602	Y57A10A.1	CAB60770.3, CELE_Y57A10A.1, EnsemblGenomes-Gn:WBGene00013246, EnsemblGenomes-Tr:Y57A10A.1, GI:148879266, InterPro:IPR006570, UniProtKB/TrEMBL:G5EDC2, WormBase:WBGene00013246, Y57A10A.1		2.8883	24.0758	1.23833	2.33242	0.0196785	0.0451002
RCEA080866	BX284605	F55A11.8	CAA96661.2, CELE_F55A11.8, F55A11.8, GI:85539721, UniProtKB/TrEMBL:Q20803, WormBase:WBGene00010081		2.88754	184.149	0.553857	5.21352	1.85295e-07	1.79177e-06
RCEA026350	BX284603	sas-4	CCD69136.1, CELE_F10E9.8, EnsemblGenomes-Gn:WBGene00004726, EnsemblGenomes-Tr:F10E9.8, GI:351061357, sas-4, WormBase:WBGene00004726		2.88749	234.591	0.650896	4.43617	9.15731e-06	5.77983e-05
RCEA004502	BX284601	D2030.7	CAA98119.2, CELE_D2030.7, D2030.7, EnsemblGenomes-Gn:WBGene00008417, EnsemblGenomes-Tr:D2030.7, GI:18958140, GOA:P90792, InterPro:IPR007087, InterPro:IPR015880, UniProtKB/TrEMBL:P90792, WormBase:WBGene00008417		2.88426	378.673	0.534512	5.39606	6.8122e-08	7.21137e-07
RCEA026892	BX284603	zif-1	CAA77583.2, CELE_F59B2.6, EnsemblGenomes-Gn:WBGene00006977, EnsemblGenomes-Tr:F59B2.6, GI:31441755, WormBase:WBGene00006977, zif-1		2.88051	576.509	0.438558	6.56814	5.09461e-11	1.07036e-09
RCEA080599	BX284605	duo-1	CAA98471.3, CELE_F38B7.5, duo-1, GI:393793245, GOA:Q7JLI8, InterPro:IPR001394, InterPro:IPR003323, InterPro:IPR018200, InterPro:IPR028889, UniProtKB/TrEMBL:Q7JLI8, WormBase:WBGene00001110	OTU-like cysteine protease	2.88045	111.11	0.591321	4.8712	1.10921e-06	8.80656e-06
RCEA027960	BX284603	chl-1	CAA88959.2, CELE_M03C11.2, chl-1, EnsemblGenomes-Gn:WBGene00010839, EnsemblGenomes-Tr:M03C11.2, GI:269993268, WormBase:WBGene00010839		2.87344	303.286	0.545371	5.26878	1.37337e-07	1.36445e-06
RCEA016787	BX284602	lat-1	CAA91091.1, CELE_B0457.1, GI:3873813, lat-1, WormBase:WBGene00002251		2.87039	964.429	0.591805	4.85022	1.23325e-06	9.66421e-06
RCEA003773	BX284601	T10E9.2	CCD68102.1, CELE_T10E9.2, EnsemblGenomes-Gn:WBGene00020412, EnsemblGenomes-Tr:T10E9.2, GI:351060434, InterPro:IPR015880, T10E9.2, UniProtKB/TrEMBL:O01605, WormBase:WBGene00020412		2.8703	196.936	0.763254	3.76061	0.000169498	0.000748721
RCEA081529	BX284605	C54D10.3	C54D10.3, CAA99799.1, CELE_C54D10.3, EnsemblGenomes-Gn:WBGene00008298, EnsemblGenomes-Tr:C54D10.3, GI:3875230, InterPro:IPR003582, UniProtKB/TrEMBL:Q18827, WormBase:WBGene00008298		2.86954	1218.95	0.719819	3.98648	6.70616e-05	0.0003331
RCEA091373	BX284606	F14H12.3	CCD65401.1, CELE_F14H12.3, EnsemblGenomes-Gn:WBGene00017471, EnsemblGenomes-Tr:F14H12.3, F14H12.3, GI:351050796, InterPro:IPR000884, UniProtKB/TrEMBL:Q966K7, WormBase:WBGene00017471		2.86861	133.691	1.08916	2.63377	0.00844428	0.0221495
RCEA003831	BX284601	maco-1	CCD68500.1, CELE_D2092.5, EnsemblGenomes-Gn:WBGene00017066, EnsemblGenomes-Tr:D2092.5, GI:351060762, GOA:P91193, InterPro:IPR019130, maco-1, UniProtKB/TrEMBL:P91193, WormBase:WBGene00017066		2.86604	448.673	0.49567	5.78215	7.37523e-09	9.81088e-08
RCEA012888	BX284602	athp-2	athp-2, CCD61677.1, CELE_H20J04.2, EnsemblGenomes-Gn:WBGene00019217, EnsemblGenomes-Tr:H20J04.2, GI:351065687, GOA:Q9N5L9, InterPro:IPR001487, InterPro:IPR001965, InterPro:IPR004022, InterPro:IPR011011, InterPro:IPR013083, InterPro:IPR013136, InterPro:IPR017956, InterPro:IPR018359, InterPro:IPR018500, InterPro:IPR018501, InterPro:IPR019786, InterPro:IPR019787, InterPro:IPR028935, UniProtKB/TrEMBL…		2.86566	336.931	0.531021	5.39652	6.79463e-08	7.20288e-07
RCEA019074	BX284602	F43G6.7	CAA90396.1, CELE_F43G6.7, EnsemblGenomes-Gn:WBGene00009659, EnsemblGenomes-Tr:F43G6.7, F43G6.7, GI:3877083, UniProtKB/TrEMBL:Q20368, WormBase:WBGene00009659		2.86218	59.1356	1.11986	2.55583	0.0105935	0.0269074
RCEA081136	BX284605	R07B7.2	CAB00127.4, CELE_R07B7.2, EnsemblGenomes-Gn:WBGene00011087, EnsemblGenomes-Tr:R07B7.2a, GI:315940120, R07B7.2, UniProtKB/TrEMBL:G5EBX2, WormBase:WBGene00011087		2.85891	239.67	0.530919	5.38484	7.25106e-08	7.64547e-07
RCEA012103	BX284602	fbxc-50	CCD64910.1, CELE_C17F4.5, EnsemblGenomes-Gn:WBGene00015912, EnsemblGenomes-Tr:C17F4.5, fbxc-50, GI:351050376, InterPro:IPR021942, UniProtKB/TrEMBL:O16541, WormBase:WBGene00015912		2.85453	195.7	0.675011	4.22887	2.34872e-05	0.0001325
RCEA088543	BX284606	Y73B3A.4	CCD74428.1, CELE_Y73B3A.4, EnsemblGenomes-Gn:WBGene00022206, EnsemblGenomes-Tr:Y73B3A.4, GI:351064980, InterPro:IPR011042, UniProtKB/TrEMBL:Q95XE9, WormBase:WBGene00022206, Y73B3A.4		2.85194	73.6072	0.640846	4.45028	8.57595e-06	5.44937e-05
RCEA081789	BX284605	R11D1.1	CAA99909.2, CELE_R11D1.1, EnsemblGenomes-Gn:WBGene00011242, EnsemblGenomes-Tr:R11D1.1b, GI:62954596, InterPro:IPR001680, InterPro:IPR015943, InterPro:IPR017986, R11D1.1, UniProtKB/TrEMBL:Q21934, WormBase:WBGene00011242		2.85158	211.376	0.916872	3.11012	0.00187013	0.00608386
RCEA014104	BX284602	tbc-2	CCD72509.1, CELE_ZK1248.10, EnsemblGenomes-Gn:WBGene00022880, EnsemblGenomes-Tr:ZK1248.10, GI:351064221, GOA:Q23419, InterPro:IPR000195, InterPro:IPR001849, InterPro:IPR011993, tbc-2, UniProtKB/TrEMBL:Q23419, WormBase:WBGene00022880		2.85145	1028.11	0.467567	6.09849	1.07077e-09	1.70927e-08
RCEA016969	BX284602	T24B8.5	CAA92755.2, CELE_T24B8.5, EnsemblGenomes-Gn:WBGene00011979, EnsemblGenomes-Tr:T24B8.5, GI:148879285, GOA:Q22714, InterPro:IPR003582, T24B8.5, UniProtKB/TrEMBL:Q22714, WormBase:WBGene00011979		2.8511	79.1922	0.844229	3.37717	0.000732369	0.00268346
RCEA003698	BX284601	npp-12	CCD70770.1, CELE_T23H2.1, EnsemblGenomes-Gn:WBGene00003798, EnsemblGenomes-Tr:T23H2.1, GI:351062738, GOA:P91495, InterPro:IPR003343, InterPro:IPR008964, npp-12, UniProtKB/TrEMBL:P91495, WormBase:WBGene00003798	Glycoprotein 3	2.84619	1195.4	0.366071	7.77498	7.54573e-15	3.42853e-13
RCEA019622	BX284602	lips-16	CAB54401.1, CELE_Y38E10A.10, EnsemblGenomes-Gn:WBGene00012588, EnsemblGenomes-Tr:Y38E10A.10, GI:5824733, GOA:Q9NAK1, InterPro:IPR002918, InterPro:IPR029058, lips-16, UniProtKB/TrEMBL:Q9NAK1, WormBase:WBGene00012588		2.84564	16.6253	0.985876	2.88641	0.00389669	0.0114532
RCEA029430	BX284603	F53A2.9	CAB04457.1, CELE_F53A2.9, EnsemblGenomes-Gn:WBGene00009953, EnsemblGenomes-Tr:F53A2.9, F53A2.9, GI:3877474, UniProtKB/TrEMBL:O45554, WormBase:WBGene00009953		2.84443	103.314	0.686642	4.14252	3.43507e-05	0.000184932
RCEA016820	BX284602	T21B10.4	CAA92694.1, CELE_T21B10.4, EnsemblGenomes-Gn:WBGene00011886, EnsemblGenomes-Tr:T21B10.4, GI:3879988, GOA:Q22625, T21B10.4, UniProtKB/TrEMBL:Q22625, WormBase:WBGene00011886		2.84435	201.983	0.55141	5.15832	2.49171e-07	2.32655e-06
RCEA017155	BX284602	mel-11	CAD57686.1, CELE_C06C3.1, EnsemblGenomes-Gn:WBGene00003196, EnsemblGenomes-Tr:C06C3.1c, GI:25809196, GOA:G5ECD7, InterPro:IPR002110, InterPro:IPR020683, InterPro:IPR031775, mel-11, UniProtKB/TrEMBL:G5ECD7, WormBase:WBGene00003196		2.84148	791.565	0.500821	5.67364	1.39794e-08	1.75879e-07
RCEA078765	BX284605	suds-3	CAI79223.1, CELE_T07C12.14, EnsemblGenomes-Gn:WBGene00044204, EnsemblGenomes-Tr:T07C12.14, GI:62554038, suds-3, UniProtKB/TrEMBL:Q564Z8, WormBase:WBGene00044204		2.84121	161.149	0.884241	3.21317	0.0013128	0.00444724
RCEA017591	BX284602	C08H9.16	C08H9.16, CAR31477.1, CELE_C08H9.16, EnsemblGenomes-Gn:WBGene00086566, EnsemblGenomes-Tr:C08H9.16, GI:194686129, InterPro:IPR019129, UniProtKB/TrEMBL:B5BM26, WormBase:WBGene00086566	Folate-sensitive fragile site protein Fra10Ac1	2.84004	119.448	0.788078	3.60376	0.00031365	0.00128362
RCEA098857	BX284606	C31E10.5	C31E10.5, CAB01726.2, CELE_C31E10.5, EnsemblGenomes-Gn:WBGene00007846, EnsemblGenomes-Tr:C31E10.5, GI:112982570, InterPro:IPR019159, UniProtKB/TrEMBL:Q93309, WormBase:WBGene00007846		2.83892	165.556	0.507835	5.59025	2.26747e-08	2.71466e-07
RCEA022925	BX284603	M01F1.9	CAE17898.2, CELE_M01F1.9, EnsemblGenomes-Gn:WBGene00010815, EnsemblGenomes-Tr:M01F1.9, GI:154147328, InterPro:IPR014848, M01F1.9, UniProtKB/TrEMBL:Q7YWW8, WormBase:WBGene00010815		2.83687	495.336	0.425223	6.6715	2.53206e-11	5.71799e-10
RCEA006623	BX284601	Y106G6H.16	CAA21579.1, CELE_Y106G6H.16, EnsemblGenomes-Gn:WBGene00013726, EnsemblGenomes-Tr:Y106G6H.16, GI:3880688, GOA:Q9XWR9, UniProtKB/TrEMBL:Q9XWR9, WormBase:WBGene00013726, Y106G6H.16		2.83132	41.5828	0.961778	2.94385	0.00324162	0.00976045
RCEA005967	BX284601	K07A1.15	CAE17865.1, CELE_K07A1.15, EnsemblGenomes-Gn:WBGene00010619, EnsemblGenomes-Tr:K07A1.15, GI:33300397, InterPro:IPR001163, InterPro:IPR010920, K07A1.15, UniProtKB/TrEMBL:Q7YWY5, WormBase:WBGene00010619		2.83056	28.7873	1.17829	2.40227	0.0162938	0.0384591
RCEA024990	BX284603	C16A3.2	C16A3.2, CCD63222.1, CELE_C16A3.2, EnsemblGenomes-Gn:WBGene00015807, EnsemblGenomes-Tr:C16A3.2, GI:351047542, GOA:Q9TY00, InterPro:IPR000340, InterPro:IPR000387, InterPro:IPR016130, InterPro:IPR020422, InterPro:IPR024950, InterPro:IPR029021, UniProtKB/TrEMBL:Q9TY00, WormBase:WBGene00015807		2.83045	52.7056	0.741517	3.81711	0.000135024	0.000615357
RCEA087671	BX284605	ani-3	ani-3, CAA21615.1, CELE_Y43F8C.14, EnsemblGenomes-Gn:WBGene00012835, EnsemblGenomes-Tr:Y43F8C.14, GI:3979962, WormBase:WBGene00012835		2.8295	545.599	0.349085	8.10546	5.25459e-16	2.93576e-14
RCEA028515	BX284603	Y47D3B.12	CAX51687.1, CELE_Y47D3B.12, EnsemblGenomes-Gn:WBGene00185055, EnsemblGenomes-Tr:Y47D3B.12, GI:224489531, UniProtKB/TrEMBL:B9ZSH4, WormBase:WBGene00185055, Y47D3B.12		2.82922	29.1091	1.16649	2.42541	0.015291	0.0365321
RCEA017429	BX284602	taf-8	CAE18043.1, CELE_ZK1320.12, EnsemblGenomes-Gn:WBGene00006390, EnsemblGenomes-Tr:ZK1320.12b, GI:33300435, GOA:Q7YTH5, InterPro:IPR006565, InterPro:IPR019473, taf-8, UniProtKB/TrEMBL:Q7YTH5, WormBase:WBGene00006390		2.82644	288.086	0.5743	4.92154	8.58673e-07	6.9941e-06
RCEA016268	BX284602	F35C11.5	CAA90245.2, CELE_F35C11.5, EnsemblGenomes-Gn:WBGene00009404, EnsemblGenomes-Tr:F35C11.5, F35C11.5, GI:297374679, GOA:Q20022, InterPro:IPR013090, InterPro:IPR016090, UniProtKB/TrEMBL:Q20022, WormBase:WBGene00009404		2.82273	439.265	0.5578	5.06047	4.18217e-07	3.6786e-06
RCEA086719	BX284605	B0462.5	B0462.5, CBA11602.1, CELE_B0462.5, EnsemblGenomes-Gn:WBGene00194695, EnsemblGenomes-Tr:B0462.5, GI:255068783, UniProtKB/TrEMBL:C7FZU7, WormBase:WBGene00194695		2.81861	101.352	0.730742	3.85718	0.0001147	0.000533042
RCEA031740	BX284604	M57.1	CCD61350.1, CELE_M57.1, EnsemblGenomes-Gn:WBGene00019777, EnsemblGenomes-Tr:M57.1, GI:351065378, GOA:Q9TYX9, InterPro:IPR006570, M57.1, UniProtKB/TrEMBL:Q9TYX9, WormBase:WBGene00019777		2.81837	123.646	0.769156	3.66424	0.000248074	0.00104123
RCEA017614	BX284602	C05C10.2	C05C10.2, CAC42246.1, CELE_C05C10.2, EnsemblGenomes-Gn:WBGene00007329, EnsemblGenomes-Tr:C05C10.2b.1, EnsemblGenomes-Tr:C05C10.2b.2, GI:14530347, InterPro:IPR027417, UniProtKB/TrEMBL:Q95ZZ3, WormBase:WBGene00007329		2.81528	491.943	0.578702	4.86482	1.14563e-06	9.06708e-06
RCEA089438	BX284606	ceh-39	CCD64529.1, ceh-39, CELE_T26C11.7, EnsemblGenomes-Gn:WBGene00000460, EnsemblGenomes-Tr:T26C11.7, GI:351057923, WormBase:WBGene00000460		2.81276	69.3827	0.684344	4.11015	3.95396e-05	0.000209577
RCEA074337	BX284605	neg-1	CCH63791.1, CELE_F32D1.6, GI:387910728, neg-1, UniProtKB/TrEMBL:I2HA84, WormBase:WBGene00017985		2.81187	319.401	0.586486	4.79443	1.63136e-06	1.241e-05
RCEA029569	BX284603	scav-2	CAA21747.3, CELE_Y76A2B.6, EnsemblGenomes-Gn:WBGene00013578, EnsemblGenomes-Tr:Y76A2B.6, GI:371571196, GOA:G5EBM7, InterPro:IPR002159, scav-2, UniProtKB/TrEMBL:G5EBM7, WormBase:WBGene00013578		2.81035	634.034	0.536506	5.23824	1.62112e-07	1.59002e-06
RCEA020104	BX284602	clec-146	CAB07697.2, CELE_Y48E1B.9, clec-146, EnsemblGenomes-Gn:WBGene00013008, EnsemblGenomes-Tr:Y48E1B.9a.1, EnsemblGenomes-Tr:Y48E1B.9a.2, GI:38422762, GOA:O18202, InterPro:IPR001304, InterPro:IPR016186, InterPro:IPR016187, UniProtKB/TrEMBL:O18202, WormBase:WBGene00013008		2.81026	440.482	0.762359	3.68628	0.00022756	0.000966968
RCEA044303	BX284604	F12F6.7	CAA97785.1, CELE_F12F6.7, EnsemblGenomes-Gn:WBGene00008722, EnsemblGenomes-Tr:F12F6.7.1, EnsemblGenomes-Tr:F12F6.7.2, F12F6.7, GI:3875793, WormBase:WBGene00008722		2.80986	350.265	0.425325	6.60638	3.93829e-11	8.52354e-10
RCEA045375	BX284604	prmt-3	CAB07676.1, CELE_T23B5.1, GI:3880101, GOA:O02325, InterPro:IPR025799, InterPro:IPR029063, prmt-3, UniProtKB/TrEMBL:O02325, WormBase:WBGene00011939		2.80969	1001.26	0.388832	7.22598	4.97515e-13	1.55062e-11
RCEA084362	BX284605	fbxa-95	CAB03015.3, CELE_F28F8.4, EnsemblGenomes-Gn:WBGene00009222, EnsemblGenomes-Tr:F28F8.4, fbxa-95, GI:242333235, InterPro:IPR001810, UniProtKB/TrEMBL:O17849, WormBase:WBGene00009222		2.80596	187.783	0.65485	4.28489	1.82829e-05	0.000106857
RCEA004788	BX284601	aho-3	aho-3, CAB00039.2, CELE_K04G2.2, EnsemblGenomes-Gn:WBGene00045192, EnsemblGenomes-Tr:K04G2.2, GI:54110884, InterPro:IPR029058, InterPro:IPR029059, UniProtKB/TrEMBL:Q21221, WormBase:WBGene00045192	Hydrolases of the alpha/beta superfamily	2.80581	404.568	0.439907	6.37819	1.79192e-10	3.40014e-09
RCEA027024	BX284603	cls-3	CAA79568.2, CELE_ZC84.3, cls-3, EnsemblGenomes-Gn:WBGene00013847, EnsemblGenomes-Tr:ZC84.3, GI:224492375, WormBase:WBGene00013847		2.80448	69.3718	0.673657	4.16307	3.13998e-05	0.000170629
RCEA099478	BX284606	dpf-2	CAA93743.1, CELE_C27C12.7, dpf-2, EnsemblGenomes-Gn:WBGene00001055, EnsemblGenomes-Tr:C27C12.7, GI:3892135, WormBase:WBGene00001055	Dipeptidyl peptidase IV (EC 3.4.14.5)	2.80317	338.753	0.507992	5.51814	3.42615e-08	3.90358e-07
RCEA081836	BX284605	C15C8.4	C15C8.4, CAA99779.2, CELE_C15C8.4, EnsemblGenomes-Gn:WBGene00007606, EnsemblGenomes-Tr:C15C8.4, GI:83764265, GOA:G5EF26, InterPro:IPR009066, InterPro:IPR010483, UniProtKB/TrEMBL:G5EF26, WormBase:WBGene00007606		2.80146	205.194	0.714674	3.91991	8.85818e-05	0.000424883
RCEA083240	BX284605	cept-2	CAA22073.2, CELE_Y49A3A.1, cept-2, EnsemblGenomes-Gn:WBGene00013024, EnsemblGenomes-Tr:Y49A3A.1, GI:92084867, GOA:G5EC25, InterPro:IPR000462, InterPro:IPR014472, UniProtKB/TrEMBL:G5EC25, WormBase:WBGene00013024	ETHANOLAMINEPHOSPHOTRANSFERASE (EC 2.7.8.1) / DIACYLGLYCEROL CHOLINEPHOSPHOTRANSFERASE (EC 2.7.8.2)	2.80079	537.985	0.412359	6.7921	1.10512e-11	2.68882e-10
RCEA029396	BX284603	klp-19	CAA16335.1, CELE_Y43F4B.6, EnsemblGenomes-Gn:WBGene00002229, EnsemblGenomes-Tr:Y43F4B.6, GI:3880931, GOA:O45935, InterPro:IPR001752, InterPro:IPR019821, InterPro:IPR027417, InterPro:IPR027640, klp-19, UniProtKB/TrEMBL:O45935, WormBase:WBGene00002229		2.80047	2147.57	0.369391	7.58131	3.42077e-14	1.38716e-12
RCEA001640	BX284601	cdt-1	CCD72833.1, cdt-1, CELE_Y54E10A.15, EnsemblGenomes-Gn:WBGene00000413, EnsemblGenomes-Tr:Y54E10A.15, GI:373220259, GOA:Q86S68, InterPro:IPR014939, InterPro:IPR032054, UniProtKB/TrEMBL:Q86S68, WormBase:WBGene00000413		2.79915	212.248	0.603862	4.63542	3.56217e-06	2.49815e-05
RCEA080200	BX284605	T19B10.8	CAA98541.2, CELE_T19B10.8, EnsemblGenomes-Gn:WBGene00011835, EnsemblGenomes-Tr:T19B10.8, GI:310923565, GOA:Q22561, InterPro:IPR012908, InterPro:IPR029058, T19B10.8, UniProtKB/TrEMBL:Q22561, WormBase:WBGene00011835		2.79866	473.883	0.50486	5.54342	2.96613e-08	3.45188e-07
RCEA018234	BX284602	M106.2	CAA87049.3, CELE_M106.2, EnsemblGenomes-Gn:WBGene00010910, EnsemblGenomes-Tr:M106.2, GI:169402896, GOA:Q09592, M106.2, UniProtKB/TrEMBL:Q09592, WormBase:WBGene00010910		2.79606	542.559	0.459417	6.08611	1.15684e-09	1.82733e-08
RCEA087202	BX284605	Y39B6A.37	CAD31829.1, CELE_Y39B6A.37, EnsemblGenomes-Gn:WBGene00012695, EnsemblGenomes-Tr:Y39B6A.37, GI:21038854, UniProtKB/TrEMBL:Q8MYM7, WormBase:WBGene00012695, Y39B6A.37		2.79427	332.428	0.382177	7.31144	2.64288e-13	8.72381e-12
RCEA086518	BX284605	fbxa-106	CCQ25702.1, CELE_Y59A8B.11, fbxa-106, GI:442535379, InterPro:IPR001810, InterPro:IPR002900, UniProtKB/TrEMBL:L8E967, WormBase:WBGene00013348		2.7916	27.9581	1.00167	2.78695	0.00532072	0.0149633
RCEA024452	BX284603	abi-1	abi-1, CCD61521.1, CELE_B0336.6, EnsemblGenomes-Gn:WBGene00015146, EnsemblGenomes-Tr:B0336.6.1, EnsemblGenomes-Tr:B0336.6.2, GI:351065556, GOA:Q10929, InterPro:IPR001452, InterPro:IPR012849, InterPro:IPR028457, UniProtKB/TrEMBL:Q10929, WormBase:WBGene00015146		2.79051	1172.62	0.411061	6.78855	1.13263e-11	2.72934e-10
RCEA023997	BX284603	C27F2.7	C27F2.7, CCD65744.1, CELE_C27F2.7, EnsemblGenomes-Gn:WBGene00016169, EnsemblGenomes-Tr:C27F2.7, GI:373254064, WormBase:WBGene00016169		2.78805	76.0123	0.743206	3.75138	0.000175863	0.000772989
RCEA027454	BX284603	rmd-1	CCF23359.1, CELE_T05G5.7, GI:371570805, rmd-1, WormBase:WBGene00011501		2.78572	1758.16	0.549282	5.07157	3.94543e-07	3.49893e-06
RCEA077387	BX284605	W02D7.5	CCD69835.1, CELE_W02D7.5, EnsemblGenomes-Gn:WBGene00020941, EnsemblGenomes-Tr:W02D7.5, GI:351061962, GOA:O17526, InterPro:IPR016181, UniProtKB/TrEMBL:O17526, W02D7.5, WormBase:WBGene00020941		2.78505	47.739	0.849314	3.27918	0.0010411	0.00362869
RCEA076932	BX284605	ZK105.1	CCD64281.1, CELE_ZK105.1, EnsemblGenomes-Gn:WBGene00022653, EnsemblGenomes-Tr:ZK105.1, GI:351050144, InterPro:IPR002542, InterPro:IPR016638, UniProtKB/TrEMBL:Q965Z4, WormBase:WBGene00022653, ZK105.1		2.78254	1407.75	0.558062	4.98608	6.16167e-07	5.23655e-06
RCEA025356	BX284603	panl-2	CCD63406.1, CELE_F31E3.4, EnsemblGenomes-Gn:WBGene00017951, EnsemblGenomes-Tr:F31E3.4, GI:351049704, panl-2, WormBase:WBGene00017951		2.7822	473.502	0.553595	5.02569	5.01616e-07	4.32887e-06
RCEA019203	BX284602	W03C9.2	CAA91360.2, CELE_W03C9.2, EnsemblGenomes-Gn:WBGene00012220, EnsemblGenomes-Tr:W03C9.2, GI:332078316, GOA:Q23144, UniProtKB/TrEMBL:Q23144, W03C9.2, WormBase:WBGene00012220		2.78189	350.821	0.622303	4.47031	7.81079e-06	5.00534e-05
RCEA098578	BX284606	unc-84	CAA94142.2, CELE_F54B11.3, GI:14530479, unc-84, WormBase:WBGene00006816		2.78066	1078.87	0.266659	10.4278	1.85131e-25	6.07108e-23
RCEA040939	BX284604	C49H3.6	C49H3.6, CCD67707.1, CELE_C49H3.6, EnsemblGenomes-Gn:WBGene00016792, EnsemblGenomes-Tr:C49H3.6a, GI:351060084, GOA:Q95QQ9, InterPro:IPR019131, UniProtKB/TrEMBL:Q95QQ9, WormBase:WBGene00016792		2.77988	262.636	0.670446	4.14631	3.37873e-05	0.00018242
RCEA028829	BX284603	Y56A3A.28	CAB60505.2, CELE_Y56A3A.28, EnsemblGenomes-Gn:WBGene00013240, EnsemblGenomes-Tr:Y56A3A.28, GI:51587640, GOA:Q9U235, InterPro:IPR007087, InterPro:IPR013087, InterPro:IPR015880, UniProtKB/TrEMBL:Q9U235, WormBase:WBGene00013240, Y56A3A.28		2.77976	112.46	0.580954	4.78483	1.71134e-06	1.29103e-05
RCEA008107	BX284601	W02D9.4	CAB03471.2, CELE_W02D9.4, EnsemblGenomes-Gn:WBGene00012210, EnsemblGenomes-Tr:W02D9.4, GI:211970475, UniProtKB/TrEMBL:O02336, W02D9.4, WormBase:WBGene00012210		2.77951	31.8513	0.986801	2.81669	0.00485213	0.0138573
RCEA040853	BX284604	klp-10	CELE_C33H5.4, klp-10		2.77768	139.686	0.728794	3.81134	0.000138217	0.000627257
RCEA017796	BX284602	F33H1.4	CAA88699.2, CELE_F33H1.4, EnsemblGenomes-Gn:WBGene00009365, EnsemblGenomes-Tr:F33H1.4, F33H1.4, GI:172052256, InterPro:IPR015880, UniProtKB/TrEMBL:Q19991, WormBase:WBGene00009365		2.77738	545.991	0.50452	5.50501	3.6915e-08	4.17125e-07
RCEA017785	BX284602	daf-19	CAC42295.1, CELE_F33H1.1, daf-19, EnsemblGenomes-Gn:WBGene00000914, EnsemblGenomes-Tr:F33H1.1b, GI:14530436, WormBase:WBGene00000914		2.77677	111.335	0.55831	4.97353	6.57462e-07	5.54068e-06
RCEA005011	BX284601	sin-3	CAN86581.1, CELE_F02E9.4, EnsemblGenomes-Gn:WBGene00004117, EnsemblGenomes-Tr:F02E9.4b, GI:148472944, GOA:A5JYW9, InterPro:IPR003822, InterPro:IPR013194, InterPro:IPR031693, sin-3, UniProtKB/TrEMBL:A5JYW9, WormBase:WBGene00004117		2.77503	456.547	0.648082	4.28192	1.85291e-05	0.000108128
RCEA018894	BX284602	smc-6	CAA91339.2, CELE_F54D5.14, EnsemblGenomes-Gn:WBGene00010056, EnsemblGenomes-Tr:F54D5.14, GI:345109093, GOA:G5EG17, InterPro:IPR003395, InterPro:IPR010935, InterPro:IPR027132, InterPro:IPR027417, smc-6, UniProtKB/TrEMBL:G5EG17, WormBase:WBGene00010056		2.77381	749.246	0.617744	4.49023	7.11461e-06	4.6141e-05
RCEA086875	BX284605	hmit-1.1	CAA16400.1, CELE_Y51A2D.4, EnsemblGenomes-Gn:WBGene00013073, EnsemblGenomes-Tr:Y51A2D.4, GI:3881037, GOA:Q9XXR3, hmit-1.1, InterPro:IPR003663, InterPro:IPR005828, InterPro:IPR005829, InterPro:IPR020846, UniProtKB/TrEMBL:Q9XXR3, WormBase:WBGene00013073	Myo-inositol transporter	2.77357	331.916	0.585364	4.7382	2.15625e-06	1.58978e-05
RCEA001627	BX284601	Y54E10A.12	CCD72831.1, CELE_Y54E10A.12, EnsemblGenomes-Gn:WBGene00021832, EnsemblGenomes-Tr:Y54E10A.12, GI:373220257, UniProtKB/TrEMBL:Q9N3E8, WormBase:WBGene00021832, Y54E10A.12		2.77211	116.785	0.636406	4.35589	1.3253e-05	7.98726e-05
RCEA006331	BX284601	ercc-1	CAB02283.2, CELE_F10G8.7, EnsemblGenomes-Gn:WBGene00008665, EnsemblGenomes-Tr:F10G8.7.1, EnsemblGenomes-Tr:F10G8.7.2, ercc-1, GI:21615452, GOA:Q93456, InterPro:IPR004579, InterPro:IPR010994, InterPro:IPR011335, UniProtKB/TrEMBL:Q93456, WormBase:WBGene00008665		2.76584	278.774	0.52784	5.23992	1.60647e-07	1.57668e-06
RCEA034691	BX284604	sand-1	CCD71104.1, CELE_F41H10.11, EnsemblGenomes-Gn:WBGene00018321, EnsemblGenomes-Tr:F41H10.11, GI:351063057, GOA:Q9BI89, InterPro:IPR004353, sand-1, UniProtKB/TrEMBL:Q9BI89, WormBase:WBGene00018321		2.765	509.381	0.442197	6.25285	4.03021e-10	7.00912e-09
RCEA079840	BX284605	F17C11.10	CAA96632.1, CELE_F17C11.10, EnsemblGenomes-Gn:WBGene00008921, EnsemblGenomes-Tr:F17C11.10, F17C11.10, GI:3876062, GOA:Q19520, InterPro:IPR001680, InterPro:IPR015943, InterPro:IPR017986, InterPro:IPR019775, InterPro:IPR022100, UniProtKB/TrEMBL:Q19520, WormBase:WBGene00008921		2.7647	632.411	0.528108	5.23511	1.64888e-07	1.61588e-06
RCEA025171	BX284603	isw-1	CCD70709.1, CELE_F37A4.8, EnsemblGenomes-Gn:WBGene00002169, EnsemblGenomes-Tr:F37A4.8, GI:351062670, isw-1, WormBase:WBGene00002169	SWF/SNF family helicase	2.76462	1029.46	0.374286	7.38638	1.5088e-13	5.29309e-12
RCEA020707	BX284602	spat-1	CCF23334.1, CELE_F57C2.6, GI:371571152, GOA:H2FLK2, InterPro:IPR023252, spat-1, UniProtKB/TrEMBL:H2FLK2, WormBase:WBGene00010198		2.76439	310.117	0.457253	6.04566	1.48802e-09	2.28582e-08
RCEA044944	BX284604	F35G2.1	CAA93467.1, CELE_F35G2.1, F35G2.1, GI:3876767, GOA:Q20063, InterPro:IPR012336, InterPro:IPR013766, InterPro:IPR017905, InterPro:IPR017937, UniProtKB/TrEMBL:Q20063, WormBase:WBGene00009435		2.76374	889.133	0.441914	6.25403	3.99997e-10	6.98358e-09
RCEA012072	BX284602	ZC239.22	CCD64946.1, CELE_ZC239.22, EnsemblGenomes-Gn:WBGene00194717, EnsemblGenomes-Tr:ZC239.22, GI:351050402, InterPro:IPR008588, UniProtKB/TrEMBL:C8JQQ3, WormBase:WBGene00194717, ZC239.22		2.76351	91.6926	0.737074	3.74929	0.000177334	0.000778999
RCEA084208	BX284605	cyb-3	CAB03311.2, CELE_T06E6.2, cyb-3, GI:299782134, WormBase:WBGene00000868		2.76265	4506.82	0.566355	4.87795	1.07193e-06	8.5556e-06
RCEA084384	BX284605	B0391.8	B0391.8, CELE_B0391.8		2.76211	31.1738	0.997695	2.76849	0.00563169	0.0156597
RCEA090814	BX284606	C02F12.5	C02F12.5, CCD62378.1, CELE_C02F12.5, EnsemblGenomes-Gn:WBGene00015355, EnsemblGenomes-Tr:C02F12.5, GI:373218683, WormBase:WBGene00015355		2.7612	215.008	0.857724	3.21922	0.0012854	0.00436816
RCEA004076	BX284601	T10B11.8	CCD66245.1, CELE_T10B11.8, EnsemblGenomes-Gn:WBGene00020404, EnsemblGenomes-Tr:T10B11.8a, GI:373219157, T10B11.8, UniProtKB/TrEMBL:Q9TZH5, WormBase:WBGene00020404		2.75993	52.1327	1.16346	2.37218	0.0176836	0.041217
RCEA040828	BX284604	tag-321	CCD66583.1, CELE_C33H5.19, EnsemblGenomes-Gn:WBGene00044325, EnsemblGenomes-Tr:C33H5.19.1, EnsemblGenomes-Tr:C33H5.19.2, GI:351058808, GOA:Q95QS6, InterPro:IPR019537, tag-321, UniProtKB/TrEMBL:Q95QS6, WormBase:WBGene00044325		2.75895	228.245	0.547767	5.03672	4.73581e-07	4.10337e-06
RCEA000160	BX284601	mbtr-1	CCD67944.1, CELE_Y48G1A.6, GI:351060314, mbtr-1, WormBase:WBGene00021661	TUMOR-SUPRESSOR PROTEIN	2.75894	129.637	0.601	4.59059	4.41993e-06	3.02517e-05
RCEA021361	BX284603	F10C5.2	CCD69152.1, CELE_F10C5.2, EnsemblGenomes-Gn:WBGene00017328, EnsemblGenomes-Tr:F10C5.2.1, EnsemblGenomes-Tr:F10C5.2.2, F10C5.2, GI:351061364, GOA:Q19293, InterPro:IPR019358, UniProtKB/TrEMBL:Q19293, WormBase:WBGene00017328		2.75758	1652.8	0.425464	6.48134	9.09107e-11	1.82608e-09
RCEA034547	BX284604	Y4C6B.3	CDK13493.1, CELE_Y4C6B.3, GI:563403558, GOA:V6CLQ0, InterPro:IPR011701, InterPro:IPR020846, UniProtKB/TrEMBL:V6CLQ0, WormBase:WBGene00021157, Y4C6B.3		2.75605	36.2374	0.899485	3.06404	0.00218373	0.00694823
RCEA016996	BX284602	T24H10.4	CAA90944.2, CELE_T24H10.4, EnsemblGenomes-Gn:WBGene00012002, EnsemblGenomes-Tr:T24H10.4, GI:33300440, InterPro:IPR008547, InterPro:IPR029058, T24H10.4, UniProtKB/TrEMBL:Q22750, WormBase:WBGene00012002		2.75426	624.726	0.461826	5.96385	2.46358e-09	3.60807e-08
RCEA026390	BX284603	R05D3.8	CCD73196.1, CELE_R05D3.8, EnsemblGenomes-Gn:WBGene00019881, EnsemblGenomes-Tr:R05D3.8, GI:351064708, R05D3.8, WormBase:WBGene00019881		2.74725	99.1738	0.693763	3.95993	7.49714e-05	0.000368266
RCEA013684	BX284602	EEED8.2	CCD68729.1, CELE_EEED8.2, EEED8.2, EnsemblGenomes-Gn:WBGene00017133, EnsemblGenomes-Tr:EEED8.2, GI:351060982, WormBase:WBGene00017133		2.74691	20.5003	0.982766	2.79508	0.00518864	0.0146519
RCEA011814	BX284602	Y110A2AR.1	CCD73700.1, CELE_Y110A2AR.1, EnsemblGenomes-Gn:WBGene00022452, EnsemblGenomes-Tr:Y110A2AR.1, GI:351051500, GOA:Q9N488, InterPro:IPR004345, UniProtKB/TrEMBL:Q9N488, WormBase:WBGene00022452, Y110A2AR.1		2.74674	1397.88	0.512735	5.35703	8.45989e-08	8.78908e-07
RCEA037192	BX284604	inx-7	CCD61803.1, CELE_K02B2.4, EnsemblGenomes-Gn:WBGene00002129, EnsemblGenomes-Tr:K02B2.4a, GI:351065824, inx-7, WormBase:WBGene00002129		2.74553	133.25	0.554263	4.95347	7.29007e-07	6.07238e-06
RCEA026101	BX284603	lin-36	CCD63449.1, CELE_F44B9.6, EnsemblGenomes-Gn:WBGene00003021, EnsemblGenomes-Tr:F44B9.6, GI:351021181, lin-36, WormBase:WBGene00003021		2.74534	594.298	0.447134	6.13986	8.25918e-10	1.36167e-08
RCEA008909	BX284601	W04A8.1	CAB04902.1, CELE_W04A8.1, EnsemblGenomes-Gn:WBGene00012236, EnsemblGenomes-Tr:W04A8.1a, GI:3880472, InterPro:IPR001357, UniProtKB/TrEMBL:Q9XUM4, W04A8.1, WormBase:WBGene00012236		2.74439	125.648	0.590589	4.64688	3.36992e-06	2.37659e-05
RCEA079672	BX284605	C29A12.1	C29A12.1, CAA98244.1, CELE_C29A12.1, EnsemblGenomes-Gn:WBGene00007797, EnsemblGenomes-Tr:C29A12.1, GI:3874602, UniProtKB/TrEMBL:Q18292, WormBase:WBGene00007797		2.74383	113.964	0.711564	3.85606	0.000115229	0.000535169
RCEA004954	BX284601	F52B5.7	CAE17852.1, CELE_F52B5.7, EnsemblGenomes-Gn:WBGene00009923, EnsemblGenomes-Tr:F52B5.7, F52B5.7, GI:33300065, GOA:Q7YWZ7, InterPro:IPR007087, InterPro:IPR013087, InterPro:IPR015880, UniProtKB/TrEMBL:Q7YWZ7, WormBase:WBGene00009923		2.74296	47.8244	0.837545	3.275	0.00105663	0.0036718
RCEA043112	BX284604	C24F3.2	C24F3.2, CAA18771.1, CELE_C24F3.2, EnsemblGenomes-Gn:WBGene00007697, EnsemblGenomes-Tr:C24F3.2, GI:3874482, GOA:Q9XXK8, InterPro:IPR000340, InterPro:IPR000387, InterPro:IPR016278, InterPro:IPR020422, InterPro:IPR024950, InterPro:IPR029021, UniProtKB/TrEMBL:Q9XXK8, WormBase:WBGene00007697		2.7429	119.914	0.558667	4.90971	9.12094e-07	7.3841e-06
RCEA002771	BX284601	fncm-1	CCD66428.1, CELE_F56A3.1, EnsemblGenomes-Gn:WBGene00018908, EnsemblGenomes-Tr:F56A3.1, fncm-1, GI:373219194, UniProtKB/TrEMBL:P91352, WormBase:WBGene00018908		2.74135	100.114	0.637897	4.29748	1.7275e-05	0.000101596
RCEA085619	BX284605	Y102A5C.2	CAA20943.2, CELE_Y102A5C.2, EnsemblGenomes-Gn:WBGene00013611, EnsemblGenomes-Tr:Y102A5C.2, GI:92084864, UniProtKB/TrEMBL:Q9XX92, WormBase:WBGene00013611, Y102A5C.2		2.74048	51.6564	0.964609	2.84103	0.00449685	0.0129902
RCEA004704	BX284601	nmy-2	CAA99841.2, CELE_F20G4.3, GI:14530418, GOA:G5EBY3, InterPro:IPR000048, InterPro:IPR001609, InterPro:IPR002928, InterPro:IPR027401, InterPro:IPR027417, nmy-2, UniProtKB/TrEMBL:G5EBY3, WormBase:WBGene00003777	Myosin heavy chain	2.73942	2589.27	0.431099	6.3545	2.09112e-10	3.88959e-09
RCEA027530	BX284603	K11H3.8	CAX51681.1, CELE_K11H3.8, EnsemblGenomes-Gn:WBGene00185002, EnsemblGenomes-Tr:K11H3.8a, GI:224492399, InterPro:IPR003169, K11H3.8, UniProtKB/TrEMBL:C0P272, WormBase:WBGene00185002		2.73846	76.5981	0.783327	3.49593	0.000472414	0.00183811
RCEA003104	BX284601	T19B4.5	CCD62977.1, CELE_T19B4.5, EnsemblGenomes-Gn:WBGene00020558, EnsemblGenomes-Tr:T19B4.5, GI:351020989, T19B4.5, UniProtKB/TrEMBL:P91453, WormBase:WBGene00020558		2.73729	466.27	0.4866	5.62534	1.85148e-08	2.26517e-07
RCEA005684	BX284601	lin-41	CAC42254.1, CELE_C12C8.3, EnsemblGenomes-Gn:WBGene00003026, EnsemblGenomes-Tr:C12C8.3a.1, EnsemblGenomes-Tr:C12C8.3a.2, GI:14530341, lin-41, WormBase:WBGene00003026		2.72966	434.322	0.511587	5.33567	9.51903e-08	9.74183e-07
RCEA031035	BX284604	eri-5	CCD67379.1, CELE_Y38F2AR.1, EnsemblGenomes-Gn:WBGene00021419, EnsemblGenomes-Tr:Y38F2AR.1a, eri-5, GI:351059796, InterPro:IPR002999, UniProtKB/TrEMBL:Q95XS0, WormBase:WBGene00021419		2.72805	212.044	0.736353	3.70481	0.000211552	0.000908158
RCEA001560	BX284601	mod-5	CCD72993.1, CELE_Y54E10BR.7, GI:351064550, GOA:Q9N3C7, InterPro:IPR000175, mod-5, UniProtKB/TrEMBL:Q9N3C7, WormBase:WBGene00003387	Sodium-dependent serotonin transporter	2.72757	20.1668	1.04635	2.60674	0.00914085	0.0237495
RCEA027219	BX284603	tag-342	CAA79545.2, CELE_B0464.8, EnsemblGenomes-Gn:WBGene00007187, EnsemblGenomes-Tr:B0464.8, GI:50507457, tag-342, UniProtKB/TrEMBL:Q9XVX8, WormBase:WBGene00007187		2.72514	189.856	0.548607	4.96738	6.7865e-07	5.70331e-06
RCEA095090	BX284606	chup-1	CCD73100.1, CELE_ZK721.1, chup-1, EnsemblGenomes-Gn:WBGene00006477, EnsemblGenomes-Tr:ZK721.1a, GI:351064593, GOA:Q9GYF0, InterPro:IPR025958, UniProtKB/TrEMBL:Q9GYF0, WormBase:WBGene00006477		2.72314	91.3104	0.539317	5.04923	4.43585e-07	3.86568e-06
RCEA082537	BX284605	bir-2	bir-2, CAB01130.1, CELE_C50B8.2, EnsemblGenomes-Gn:WBGene00000250, EnsemblGenomes-Tr:C50B8.2, GI:3875145, GOA:G5ECJ5, InterPro:IPR001370, UniProtKB/TrEMBL:G5ECJ5, WormBase:WBGene00000250		2.7217	180.576	0.630515	4.31664	1.58423e-05	9.40132e-05
RCEA002723	BX284601	aap-1	aap-1, CCD66201.1, CELE_Y110A7A.10, EnsemblGenomes-Gn:WBGene00000001, EnsemblGenomes-Tr:Y110A7A.10, GI:351065062, GOA:G5EDP9, InterPro:IPR000980, InterPro:IPR001720, UniProtKB/TrEMBL:G5EDP9, WormBase:WBGene00000001		2.71921	478.807	0.416656	6.52627	6.74284e-11	1.38956e-09
RCEA043921	BX284604	swsn-4	CAA92768.1, CELE_F01G4.1, EnsemblGenomes-Gn:WBGene00004204, EnsemblGenomes-Tr:F01G4.1, GI:3875463, GOA:G5EF53, InterPro:IPR000330, InterPro:IPR001487, InterPro:IPR001650, InterPro:IPR006576, InterPro:IPR014001, InterPro:IPR014012, InterPro:IPR014978, InterPro:IPR018359, InterPro:IPR027417, swsn-4, UniProtKB/TrEMBL:G5EF53, WormBase:WBGene00004204		2.7185	1048.69	0.576091	4.71888	2.37148e-06	1.72987e-05
RCEA076594	BX284605	clec-7	CCD62811.1, CELE_F10G2.3, clec-7, EnsemblGenomes-Gn:WBGene00017364, EnsemblGenomes-Tr:F10G2.3, GI:351020833, GOA:Q22955, InterPro:IPR000859, InterPro:IPR001304, InterPro:IPR016186, InterPro:IPR016187, UniProtKB/TrEMBL:Q22955, WormBase:WBGene00017364		2.71834	59.2393	0.853804	3.18379	0.0014536	0.00487219
RCEA007775	BX284601	rrf-2	CAC35914.1, CELE_M01G12.12, EnsemblGenomes-Gn:WBGene00004509, EnsemblGenomes-Tr:M01G12.12, GI:13655331, GOA:G5EFA8, InterPro:IPR007855, rrf-2, UniProtKB/TrEMBL:G5EFA8, WormBase:WBGene00004509	RNA-dependent RNA polymerase 6-like	2.71736	154.654	0.775418	3.50438	0.000457666	0.00178904
RCEA091754	BX284606	R08E3.2	CCD70860.1, CELE_R08E3.2, EnsemblGenomes-Gn:WBGene00019958, EnsemblGenomes-Tr:R08E3.2, GI:351062813, InterPro:IPR000742, InterPro:IPR013032, R08E3.2, UniProtKB/TrEMBL:Q21849, WormBase:WBGene00019958		2.71713	157.975	0.615215	4.41656	1.00286e-05	6.24611e-05
RCEA029684	BX284603	toca-2	CAB04595.2, CELE_K08E3.3, EnsemblGenomes-Gn:WBGene00010663, EnsemblGenomes-Tr:K08E3.3b, GI:51014206, GOA:Q9XUS7, InterPro:IPR001060, InterPro:IPR001452, InterPro:IPR031160, toca-2, UniProtKB/TrEMBL:Q9XUS7, WormBase:WBGene00010663		2.71589	234.196	0.647023	4.19751	2.69862e-05	0.000149664
RCEA009793	BX284602	F48A11.4	CCD71485.1, CELE_F48A11.4, EnsemblGenomes-Gn:WBGene00018585, EnsemblGenomes-Tr:F48A11.4, F48A11.4, GI:351063328, UniProtKB/TrEMBL:O17369, WormBase:WBGene00018585		2.71451	237.015	0.541363	5.01421	5.32512e-07	4.57457e-06
RCEA045711	BX284604	C39E9.11	C39E9.11, CAA94340.1, CELE_C39E9.11, EnsemblGenomes-Gn:WBGene00008034, EnsemblGenomes-Tr:C39E9.11, GI:3874849, InterPro:IPR018800, UniProtKB/TrEMBL:Q18535, WormBase:WBGene00008034		2.71365	573.025	0.502116	5.40444	6.50122e-08	6.92103e-07
RCEA093639	BX284606	B0403.3	B0403.3, CCD61842.1, CELE_B0403.3, EnsemblGenomes-Gn:WBGene00015167, EnsemblGenomes-Tr:B0403.3, GI:351065854, WormBase:WBGene00015167		2.71276	234.149	0.513756	5.28025	1.29007e-07	1.28965e-06
RCEA075872	BX284605	dgtr-1	CCD74261.1, CELE_W01A11.2, dgtr-1, EnsemblGenomes-Gn:WBGene00020910, EnsemblGenomes-Tr:W01A11.2, GI:351050996, GOA:Q23067, InterPro:IPR007130, UniProtKB/TrEMBL:Q23067, WormBase:WBGene00020910	Diacylglycerol O-acyltransferase (EC 2.3.1.20)	2.71257	159.79	0.76688	3.53715	0.000404464	0.00160393
RCEA026346	BX284603	F10E9.3	CCD69130.1, CELE_F10E9.3, EnsemblGenomes-Gn:WBGene00017355, EnsemblGenomes-Tr:F10E9.3, F10E9.3, GI:351061351, WormBase:WBGene00017355		2.71189	627.775	0.378001	7.1743	7.26772e-13	2.20148e-11
RCEA001472	BX284601	Y71F9AL.8	CCD73503.1, CELE_Y71F9AL.8, EnsemblGenomes-Gn:WBGene00022113, EnsemblGenomes-Tr:Y71F9AL.8, GI:351059474, UniProtKB/TrEMBL:Q9N4I2, WormBase:WBGene00022113, Y71F9AL.8		2.71096	201.565	0.557532	4.86242	1.15958e-06	9.15827e-06
RCEA042514	BX284604	ins-7	CCG28260.1, CELE_ZK1251.2, GI:379657044, GOA:H9G2S9, ins-7, InterPro:IPR003235, InterPro:IPR016179, InterPro:IPR022353, UniProtKB/TrEMBL:H9G2S9, WormBase:WBGene00002090		2.71024	120.725	0.745053	3.63765	0.000275135	0.00114084
RCEA097976	BX284606	abf-5	abf-5, CAA90673.1, CELE_T22H6.5, EnsemblGenomes-Gn:WBGene00000016, EnsemblGenomes-Tr:T22H6.5, GI:3880067, UniProtKB/TrEMBL:G5EFQ2, WormBase:WBGene00000016		2.70832	56.2357	1.00069	2.70647	0.00680027	0.0183773
RCEA049044	BX284604	cfp-1	CAB05197.3, CELE_F52B11.1, cfp-1, GI:30145761, GOA:Q9XUE7, InterPro:IPR022056, UniProtKB/TrEMBL:Q9XUE7, WormBase:WBGene00009924		2.70593	296.819	0.499597	5.41622	6.08709e-08	6.4985e-07
RCEA074897	BX284605	B0238.9	B0238.9, CCD61482.1, CELE_B0238.9, EnsemblGenomes-Gn:WBGene00015073, EnsemblGenomes-Tr:B0238.9a, EnsemblGenomes-Tr:B0238.9b, GI:351065513, InterPro:IPR026066, UniProtKB/TrEMBL:O16485, WormBase:WBGene00015073		2.70558	269.599	0.399847	6.76654	1.31897e-11	3.11859e-10
RCEA079530	BX284605	T28B11.1	CAA98290.1, CELE_T28B11.1, EnsemblGenomes-Gn:WBGene00012117, EnsemblGenomes-Tr:T28B11.1a.1, EnsemblGenomes-Tr:T28B11.1a.2, GI:3880341, InterPro:IPR001810, T28B11.1, UniProtKB/TrEMBL:Q22842, WormBase:WBGene00012117		2.70483	710.906	0.326791	8.27694	1.26384e-16	8.01107e-15
RCEA041899	BX284604	mans-4	CAA92567.1, CELE_ZC410.3, GI:3881381, GOA:Q23296, InterPro:IPR001382, mans-4, UniProtKB/TrEMBL:Q23296, WormBase:WBGene00013881	Mannosyl-oligosaccharide alpha-1,2-mannosidase (EC 3.2.1.113)	2.70419	171.014	0.7125	3.79536	0.000147431	0.000661552
RCEA094231	BX284606	vit-1	CCD67565.1, CELE_K09F5.2, EnsemblGenomes-Gn:WBGene00006925, EnsemblGenomes-Tr:K09F5.2, GI:351059965, vit-1, WormBase:WBGene00006925	Vitellogenin	2.70229	4004.79	0.769106	3.51355	0.000442161	0.00173472
RCEA031684	BX284604	F58E2.3	CCD64039.1, CELE_F58E2.3, EnsemblGenomes-Gn:WBGene00019047, EnsemblGenomes-Tr:F58E2.3, F58E2.3, GI:351049969, InterPro:IPR001810, InterPro:IPR002900, UniProtKB/TrEMBL:Q9TYZ7, WormBase:WBGene00019047		2.70112	22.0703	1.12423	2.40265	0.0162767	0.0384308
RCEA092868	BX284606	T25B2.2	CCD66693.1, CELE_T25B2.2, EnsemblGenomes-Gn:WBGene00020786, EnsemblGenomes-Tr:T25B2.2a, GI:351058897, T25B2.2, UniProtKB/TrEMBL:H2KZ74, WormBase:WBGene00020786		2.70068	201.34	0.887778	3.04207	0.00234957	0.00740715
RCEA014365	BX284602	cec-9	CCD66109.1, cec-9, CELE_C29H12.5, EnsemblGenomes-Gn:WBGene00016236, EnsemblGenomes-Tr:C29H12.5, GI:373219140, GOA:Q18313, InterPro:IPR000719, InterPro:IPR000953, InterPro:IPR011009, InterPro:IPR016197, InterPro:IPR023779, InterPro:IPR023780, UniProtKB/TrEMBL:Q18313, WormBase:WBGene00016236		2.69898	86.6265	0.886594	3.04421	0.00233291	0.0073654
RCEA002997	BX284601	F59A3.12	CCD63904.1, CELE_F59A3.12, EnsemblGenomes-Gn:WBGene00185086, EnsemblGenomes-Tr:F59A3.12, F59A3.12, GI:351049861, UniProtKB/TrEMBL:P91357, WormBase:WBGene00185086		2.69888	222.92	0.544806	4.95384	7.27643e-07	6.06694e-06
RCEA013394	BX284602	smc-5	CCD63066.1, CELE_C27A2.1, EnsemblGenomes-Gn:WBGene00016151, EnsemblGenomes-Tr:C27A2.1, GI:351021050, GOA:Q18237, InterPro:IPR003395, InterPro:IPR027131, InterPro:IPR027417, smc-5, UniProtKB/TrEMBL:Q18237, WormBase:WBGene00016151	DNA repair protein spr18	2.69762	577.854	0.563269	4.78922	1.67432e-06	1.26792e-05
RCEA097413	BX284606	C49F5.3	C49F5.3, CAB03977.1, CELE_C49F5.3, EnsemblGenomes-Gn:WBGene00008207, EnsemblGenomes-Tr:C49F5.3, GI:3875066, GOA:O17682, UniProtKB/TrEMBL:O17682, WormBase:WBGene00008207		2.69732	72.4397	0.611031	4.41437	1.01304e-05	6.30436e-05
RCEA003029	BX284601	M01A10.1	CCD72087.1, CELE_M01A10.1, EnsemblGenomes-Gn:WBGene00019692, EnsemblGenomes-Tr:M01A10.1, GI:373220094, GOA:P91393, InterPro:IPR004087, InterPro:IPR004088, InterPro:IPR015096, M01A10.1, UniProtKB/TrEMBL:P91393, WormBase:WBGene00019692		2.6963	186.814	0.544494	4.95194	7.34765e-07	6.11359e-06
RCEA005416	BX284601	snpc-4	CAB04241.1, CELE_F32H2.1, EnsemblGenomes-Gn:WBGene00001568, EnsemblGenomes-Tr:F32H2.1a, GI:3876621, snpc-4, WormBase:WBGene00001568		2.69384	448.684	0.486289	5.53959	3.03188e-08	3.50736e-07
RCEA041813	BX284604	C53B4.4	C53B4.4, CAA92456.3, CELE_C53B4.4, EnsemblGenomes-Gn:WBGene00008274, EnsemblGenomes-Tr:C53B4.4b, GI:222350552, GOA:Q18798, InterPro:IPR001478, InterPro:IPR002219, UniProtKB/TrEMBL:Q18798, WormBase:WBGene00008274		2.69303	705.741	0.610765	4.40927	1.0372e-05	6.43081e-05
RCEA028240	BX284603	hex-3	CAA19506.3, CELE_Y39A1C.4, GI:158934206, GOA:G5EDG9, hex-3, InterPro:IPR013781, InterPro:IPR015883, InterPro:IPR017853, UniProtKB/TrEMBL:G5EDG9, WormBase:WBGene00012663	Hypothetical protein	2.691	201.05	0.453667	5.93165	2.99901e-09	4.2963e-08
RCEA006176	BX284601	K10C3.4	CAB05771.1, CELE_K10C3.4, EnsemblGenomes-Gn:WBGene00010731, EnsemblGenomes-Tr:K10C3.4a, GI:3878507, GOA:O45665, InterPro:IPR029668, K10C3.4, UniProtKB/TrEMBL:O45665, WormBase:WBGene00010731		2.69054	198.748	0.683165	3.93834	8.20468e-05	0.000397967
RCEA021964	BX284603	snf-6	CCD73021.1, CELE_M01G5.5, EnsemblGenomes-Gn:WBGene00004905, EnsemblGenomes-Tr:M01G5.5, GI:373220340, snf-6, WormBase:WBGene00004905	Sodium- and chloride-dependent glycine transporter	2.68829	202.488	0.688182	3.90637	9.36932e-05	0.000445574
RCEA017522	BX284602	cyp-13A5	CAA88604.1, CELE_T10B9.2, cyp-13A5, EnsemblGenomes-Gn:WBGene00011672, EnsemblGenomes-Tr:T10B9.2, GI:3879660, WormBase:WBGene00011672		2.6876	241.893	0.768241	3.49838	0.000468088	0.00182458
RCEA014957	BX284602	T14B4.3	CCD65270.1, CELE_T14B4.3, EnsemblGenomes-Gn:WBGene00020500, EnsemblGenomes-Tr:T14B4.3, GI:351050671, GOA:Q22482, InterPro:IPR012493, T14B4.3, UniProtKB/TrEMBL:Q22482, WormBase:WBGene00020500		2.68612	207.235	0.434035	6.18872	6.06547e-10	1.02346e-08
RCEA077132	BX284605	F26D11.1	CCD70047.1, CELE_F26D11.1, EnsemblGenomes-Gn:WBGene00017818, EnsemblGenomes-Tr:F26D11.1.1, EnsemblGenomes-Tr:F26D11.1.2, F26D11.1, GI:351062128, GOA:O61968, InterPro:IPR006001, InterPro:IPR027417, InterPro:IPR031322, UniProtKB/TrEMBL:O61968, WormBase:WBGene00017818	Gluconokinase (EC 2.7.1.12)	2.68582	161.235	0.600072	4.47584	7.61126e-06	4.89203e-05
RCEA009569	BX284601	F31C3.3	CAB07193.4, CELE_F31C3.3, EnsemblGenomes-Gn:WBGene00009285, EnsemblGenomes-Tr:F31C3.3, F31C3.3, GI:194686541, InterPro:IPR019409, InterPro:IPR019441, InterPro:IPR019443, UniProtKB/TrEMBL:O62191, WormBase:WBGene00009285	Hypothetical protein	2.6855	541.398	0.531133	5.05617	4.2776e-07	3.74724e-06
RCEA014784	BX284602	wrn-1	CCD68193.1, CELE_F18C5.2, EnsemblGenomes-Gn:WBGene00006944, EnsemblGenomes-Tr:F18C5.2, GI:351060519, WormBase:WBGene00006944, wrn-1		2.68298	336.775	0.562594	4.76894	1.85197e-06	1.38851e-05
RCEA096540	BX284606	pgp-8	CAA94221.2, CELE_T21E8.3, EnsemblGenomes-Gn:WBGene00004002, EnsemblGenomes-Tr:T21E8.3, GI:22265925, GOA:G5EG03, InterPro:IPR003439, InterPro:IPR003593, InterPro:IPR011527, InterPro:IPR017871, InterPro:IPR027417, pgp-8, UniProtKB/TrEMBL:G5EG03, WormBase:WBGene00004002		2.68118	212.773	0.524971	5.1073	3.26794e-07	2.95722e-06
RCEA030419	BX284604	cec-2	CCD67235.1, cec-2, CELE_C50A2.2, GI:351059646, InterPro:IPR000953, InterPro:IPR016197, UniProtKB/TrEMBL:O44139, WormBase:WBGene00016796		2.67895	140.224	0.697018	3.84344	0.000121321	0.000561217
RCEA005935	BX284601	lem-3	CAB05722.2, CELE_F42H11.2, EnsemblGenomes-Gn:WBGene00002276, EnsemblGenomes-Tr:F42H11.2, GI:371571165, GOA:G5EGA3, InterPro:IPR000305, InterPro:IPR002110, InterPro:IPR003887, InterPro:IPR011015, InterPro:IPR020683, lem-3, UniProtKB/TrEMBL:G5EGA3, WormBase:WBGene00002276		2.67779	336.185	0.477599	5.60677	2.06133e-08	2.4976e-07
RCEA078066	BX284605	F21C10.10	CCD61441.1, CELE_F21C10.10, EnsemblGenomes-Gn:WBGene00017659, EnsemblGenomes-Tr:F21C10.10.1, EnsemblGenomes-Tr:F21C10.10.2, F21C10.10, GI:351065468, GOA:Q19660, InterPro:IPR016040, UniProtKB/TrEMBL:Q19660, WormBase:WBGene00017659		2.67718	1632.1	0.504516	5.30643	1.11794e-07	1.13334e-06
RCEA020169	BX284602	Y54G9A.5	CAA21700.1, CELE_Y54G9A.5, EnsemblGenomes-Gn:WBGene00013208, EnsemblGenomes-Tr:Y54G9A.5, GI:3881115, GOA:Q9XWG8, UniProtKB/TrEMBL:Q9XWG8, WormBase:WBGene00013208, Y54G9A.5		2.67689	183.242	0.535249	5.0012	5.69733e-07	4.87765e-06
RCEA008763	BX284601	nyn-2	CAB54490.1, CELE_Y87G2A.7, EnsemblGenomes-Gn:WBGene00013596, EnsemblGenomes-Tr:Y87G2A.7, GI:5824863, GOA:Q9NA28, InterPro:IPR028079, nyn-2, UniProtKB/TrEMBL:Q9NA28, WormBase:WBGene00013596		2.67591	420.798	0.408976	6.54295	6.03153e-11	1.25497e-09
RCEA082678	BX284605	F35E12.4	CELE_F35E12.4, F35E12.4		2.67459	45.9176	0.943057	2.83609	0.004567	0.0131727
RCEA086725	BX284605	C08E8.10	C08E8.10, CAQ35016.1, CELE_C08E8.10, EnsemblGenomes-Gn:WBGene00077692, EnsemblGenomes-Tr:C08E8.10, GI:172052159, UniProtKB/TrEMBL:B2D6P7, WormBase:WBGene00077692		2.67396	62.5705	0.969297	2.75866	0.0058039	0.0160528
RCEA025043	BX284603	jhdm-1	CCD63210.2, CELE_T26A5.5, GI:919007411, jhdm-1, WormBase:WBGene00020821		2.67258	392.483	0.468944	5.69915	1.20405e-08	1.53795e-07
RCEA015154	BX284602	cyn-10	CCD61542.1, CELE_B0252.4, cyn-10, EnsemblGenomes-Gn:WBGene00000886, EnsemblGenomes-Tr:B0252.4b, GI:373218556, WormBase:WBGene00000886	Peptidyl-prolyl cis-trans isomerase (EC 5.2.1.8)	2.67243	321.693	0.506765	5.27351	1.33836e-07	1.33174e-06
RCEA012207	BX284602	bath-28	bath-28, CCD69490.1, CELE_F14D2.13, EnsemblGenomes-Gn:WBGene00017461, EnsemblGenomes-Tr:F14D2.13b, GI:351061644, InterPro:IPR001810, InterPro:IPR002900, UniProtKB/TrEMBL:H2KZR8, WormBase:WBGene00017461		2.67201	124.686	0.689215	3.87689	0.000105799	0.00049688
RCEA071032	BX284604	C30H6.12	C30H6.12, CCG28140.1, CELE_C30H6.12, GI:379657137, UniProtKB/TrEMBL:H9G2Z6, WormBase:WBGene00044238		2.67009	78.1405	0.79613	3.35384	0.000796979	0.00288515
RCEA044418	BX284604	inx-9	CAA92634.2, CELE_ZK792.3, EnsemblGenomes-Gn:WBGene00002131, EnsemblGenomes-Tr:ZK792.3, GI:54110851, GOA:Q23594, InterPro:IPR000990, inx-9, UniProtKB/TrEMBL:Q23594, WormBase:WBGene00002131	Gap junction-forming innexin protein	2.66689	207.914	0.581786	4.58396	4.56244e-06	3.10719e-05
RCEA004635	BX284601	D2005.4	CAB02083.2, CELE_D2005.4, D2005.4, EnsemblGenomes-Gn:WBGene00008399, EnsemblGenomes-Tr:D2005.4.1, EnsemblGenomes-Tr:D2005.4.2, GI:193248219, UniProtKB/TrEMBL:Q93410, WormBase:WBGene00008399		2.66474	183.883	0.514825	5.176	2.26694e-07	2.14132e-06
RCEA009547	BX284601	pole-1	CAB04263.1, CELE_F33H2.5, EnsemblGenomes-Gn:WBGene00009368, EnsemblGenomes-Tr:F33H2.5, GI:3876643, GOA:O62218, InterPro:IPR006133, InterPro:IPR006134, InterPro:IPR006172, InterPro:IPR012337, InterPro:IPR013697, pole-1, UniProtKB/TrEMBL:O62218, WormBase:WBGene00009368	DNA polymerase epsilon, catalytic subunit A (EC 2.7.7.7)	2.66282	465.106	0.553318	4.81246	1.49084e-06	1.14498e-05
RCEA091569	BX284606	amt-1	amt-1, CCD63261.1, CELE_C05E11.4, EnsemblGenomes-Gn:WBGene00000133, EnsemblGenomes-Tr:C05E11.4, GI:351047584, WormBase:WBGene00000133	Ammonium transporter	2.66244	33.9772	1.14056	2.33433	0.0195787	0.0449194
RCEA088354	BX284605	ipla-3	CAN99721.1, CELE_W07A8.2, GI:148879386, GOA:G5EGD6, InterPro:IPR002110, InterPro:IPR002641, InterPro:IPR016035, InterPro:IPR020683, ipla-3, UniProtKB/TrEMBL:G5EGD6, WormBase:WBGene00012319		2.66185	775.749	0.519882	5.12011	3.05353e-07	2.7866e-06
RCEA002482	BX284601	ugt-26	CCD64218.1, CELE_C10H11.6, EnsemblGenomes-Gn:WBGene00015695, EnsemblGenomes-Tr:C10H11.6a, GI:351050098, GOA:H2KYQ0, InterPro:IPR002213, ugt-26, UniProtKB/TrEMBL:H2KYQ0, WormBase:WBGene00015695	UDP-glucuronosyltransferase (EC 2.4.1.17)	2.6612	715.32	0.412731	6.44777	1.13511e-10	2.2408e-09
RCEA014827	BX284602	C56C10.9	C56C10.9, CCD68180.1, CELE_C56C10.9, EnsemblGenomes-Gn:WBGene00016965, EnsemblGenomes-Tr:C56C10.9, GI:351060504, GOA:Q18887, InterPro:IPR002048, InterPro:IPR011992, InterPro:IPR018247, InterPro:IPR019577, InterPro:IPR027240, UniProtKB/TrEMBL:Q18887, WormBase:WBGene00016965		2.65653	148.518	0.616618	4.30822	1.6457e-05	9.72782e-05
RCEA024676	BX284603	nop-1	CDM63515.1, CELE_F25B5.2, EnsemblGenomes-Gn:WBGene00017774, EnsemblGenomes-Tr:F25B5.2b.1, EnsemblGenomes-Tr:F25B5.2b.2, GI:583027858, nop-1, WormBase:WBGene00017774		2.65633	718.953	0.374167	7.09933	1.25367e-12	3.60221e-11
RCEA004002	BX284601	syp-4	CCD72468.1, CELE_H27M09.3, EnsemblGenomes-Gn:WBGene00019247, EnsemblGenomes-Tr:H27M09.3, GI:351064178, GOA:Q9N5K3, syp-4, UniProtKB/TrEMBL:Q9N5K3, WormBase:WBGene00019247		2.65552	305.445	0.620358	4.28062	1.86371e-05	0.000108607
RCEA025244	BX284603	ten-1	CCF23376.1, CELE_R13F6.4, GI:373219799, GOA:H1ZUX0, InterPro:IPR000742, InterPro:IPR011042, InterPro:IPR013017, InterPro:IPR013032, InterPro:IPR028916, ten-1, UniProtKB/TrEMBL:H1ZUX0, WormBase:WBGene00006498	Ten-m protein	2.65521	396.633	0.438737	6.05193	1.43124e-09	2.21439e-08
RCEA032216	BX284604	K06B9.2	CELE_K06B9.2, K06B9.2	UDP-N-acetylglucosamine pyrophosphorylase (EC 2.7.7.23)	2.65296	15.4869	1.08183	2.4523	0.0141948	0.0343264
RCEA028640	BX284603	ceh-91	CAC35859.3, ceh-91, CELE_Y66A7A.5, EnsemblGenomes-Gn:WBGene00013425, EnsemblGenomes-Tr:Y66A7A.5, GI:31441955, GOA:Q7K6J1, InterPro:IPR001356, InterPro:IPR009057, UniProtKB/TrEMBL:Q7K6J1, WormBase:WBGene00013425		2.65145	146.153	0.491176	5.39816	6.73268e-08	7.14725e-07
RCEA016206	BX284602	mig-5	CAA91307.1, CELE_T05C12.6, EnsemblGenomes-Gn:WBGene00003241, EnsemblGenomes-Tr:T05C12.6a, GI:3879448, GOA:Q22227, InterPro:IPR000591, InterPro:IPR001158, InterPro:IPR001478, InterPro:IPR011991, InterPro:IPR015506, InterPro:IPR029071, mig-5, UniProtKB/TrEMBL:Q22227, WormBase:WBGene00003241		2.65095	531.433	0.439193	6.03595	1.5803e-09	2.41772e-08
RCEA082731	BX284605	F53C11.5	CAB02122.1, CELE_F53C11.5, EnsemblGenomes-Gn:WBGene00009975, EnsemblGenomes-Tr:F53C11.5b, F53C11.5, GI:3877484, UniProtKB/TrEMBL:Q93763, WormBase:WBGene00009975		2.6485	953.276	0.519243	5.10069	3.38414e-07	3.05687e-06
RCEA002540	BX284601	htp-3	CCD62437.1, CELE_F57C9.5, EnsemblGenomes-Gn:WBGene00002034, EnsemblGenomes-Tr:F57C9.5, GI:351020449, GOA:O01820, htp-3, InterPro:IPR003511, PDB:4TZJ, PDB:4TZM, PDB:4TZN, PDB:4TZQ, UniProtKB/TrEMBL:O01820, WormBase:WBGene00002034		2.64843	447.129	0.500659	5.28989	1.22392e-07	1.23249e-06
RCEA018493	BX284602	ptr-13	CAA87375.2, CELE_K07C10.1, EnsemblGenomes-Gn:WBGene00004227, EnsemblGenomes-Tr:K07C10.1, GI:87251878, GOA:Q09934, InterPro:IPR000731, InterPro:IPR003392, ptr-13, UniProtKB/TrEMBL:Q09934, WormBase:WBGene00004227		2.64838	160.222	0.492862	5.37347	7.72358e-08	8.10224e-07
RCEA002151	BX284601	suco-1	CCD65168.1, CELE_R12E2.2, EnsemblGenomes-Gn:WBGene00020031, EnsemblGenomes-Tr:R12E2.2, GI:351050567, GOA:O61794, InterPro:IPR012919, suco-1, UniProtKB/TrEMBL:O61794, WormBase:WBGene00020031		2.64724	998.59	0.481247	5.5008	3.78081e-08	4.25623e-07
RCEA005988	BX284601	hsr-9	CAF31485.1, CELE_T05F1.6, EnsemblGenomes-Gn:WBGene00002027, EnsemblGenomes-Tr:T05F1.6, GI:42734273, GOA:Q7JKP6, hsr-9, InterPro:IPR001357, UniProtKB/TrEMBL:Q7JKP6, WormBase:WBGene00002027		2.64682	1033.49	0.439905	6.0168	1.779e-09	2.68363e-08
RCEA022186	BX284603	polh-1	CCD62153.1, CELE_F53A3.2, EnsemblGenomes-Gn:WBGene00018721, EnsemblGenomes-Tr:F53A3.2, GI:373218637, GOA:G5EFY1, InterPro:IPR001126, InterPro:IPR017061, InterPro:IPR017961, polh-1, UniProtKB/TrEMBL:G5EFY1, WormBase:WBGene00018721		2.6438	315.849	0.641376	4.12207	3.75485e-05	0.000200431
RCEA023692	BX284603	T23F11.6	CAE17971.2, CELE_T23F11.6, EnsemblGenomes-Gn:WBGene00011957, EnsemblGenomes-Tr:T23F11.6, GI:154147327, InterPro:IPR002602, T23F11.6, UniProtKB/TrEMBL:Q7YWS5, WormBase:WBGene00011957		2.64307	121.959	0.6013	4.3956	1.10469e-05	6.80117e-05
RCEA085629	BX284605	Y102A5C.5	CELE_Y102A5C.5, Y102A5C.5		2.63977	140.983	0.493097	5.35344	8.62973e-08	8.9532e-07
RCEA045351	BX284604	efa-6	CAC70120.1, CELE_Y55D9A.1, efa-6, GI:15718327, GOA:G5EET6, InterPro:IPR000904, InterPro:IPR001605, InterPro:IPR001849, InterPro:IPR011993, InterPro:IPR023394, UniProtKB/TrEMBL:G5EET6, WormBase:WBGene00013223		2.63762	1038.76	0.427111	6.17548	6.59621e-10	1.1056e-08
RCEA017348	BX284602	zfp-2	CAA85325.1, CELE_F35H8.3, EnsemblGenomes-Gn:WBGene00009448, EnsemblGenomes-Tr:F35H8.3, GI:3876751, GOA:Q20082, InterPro:IPR007087, InterPro:IPR013087, InterPro:IPR015880, UniProtKB/TrEMBL:Q20082, WormBase:WBGene00009448, zfp-2		2.63197	381.676	0.512393	5.13663	2.7971e-07	2.58701e-06
RCEA076029	BX284605	K11G9.1	CCD72924.1, CELE_K11G9.1, EnsemblGenomes-Gn:WBGene00019652, EnsemblGenomes-Tr:K11G9.1, GI:373220288, GOA:Q23010, InterPro:IPR002018, InterPro:IPR019826, InterPro:IPR029058, K11G9.1, UniProtKB/TrEMBL:Q23010, WormBase:WBGene00019652	Esterase CM06B1 (EC 3.1.1.1)	2.63183	82.5635	0.788299	3.33862	0.00084197	0.00302696
RCEA041619	BX284604	F20C5.3	CBK19442.2, CELE_F20C5.3, F20C5.3, GI:310923338, UniProtKB/TrEMBL:D3YT16, WormBase:WBGene00008968		2.63159	1068.59	0.55748	4.72052	2.35247e-06	1.71684e-05
RCEA016064	BX284602	zyg-11	CAA86661.1, CELE_C08B11.1, EnsemblGenomes-Gn:WBGene00006996, EnsemblGenomes-Tr:C08B11.1, GI:3874169, WormBase:WBGene00006996, zyg-11		2.62894	1105.89	0.448254	5.86484	4.49566e-09	6.25042e-08
RCEA023750	BX284603	him-18	CAA84736.3, CELE_T04A8.15, EnsemblGenomes-Gn:WBGene00011415, EnsemblGenomes-Tr:T04A8.15, GI:413002463, GOA:Q22145, him-18, UniProtKB/TrEMBL:Q22145, WormBase:WBGene00011415		2.62795	302.682	0.714858	3.67618	0.00023675	0.00100151
RCEA015454	BX284602	C30G12.6	C30G12.6, CCD66260.1, CELE_C30G12.6, GI:351065105, WormBase:WBGene00016277		2.6272	124.08	0.762693	3.44463	0.000571833	0.00216709
RCEA006627	BX284601	row-1	CAN86598.1, CELE_F37D6.2, EnsemblGenomes-Gn:WBGene00009508, EnsemblGenomes-Tr:F37D6.2c.1, EnsemblGenomes-Tr:F37D6.2c.2, GI:148472874, GOA:A5JYT9, InterPro:IPR007087, InterPro:IPR013087, InterPro:IPR015880, row-1, UniProtKB/TrEMBL:A5JYT9, WormBase:WBGene00009508		2.6262	399.626	0.554604	4.73527	2.18764e-06	1.61057e-05
RCEA005453	BX284601	fcp-1	CAC70088.2, CELE_F36F2.6, EnsemblGenomes-Gn:WBGene00009479, EnsemblGenomes-Tr:F36F2.6, fcp-1, GI:82658167, GOA:Q95QG8, InterPro:IPR001357, InterPro:IPR004274, InterPro:IPR011947, InterPro:IPR023214, UniProtKB/TrEMBL:Q95QG8, WormBase:WBGene00009479		2.62455	296.401	0.554585	4.73247	2.21808e-06	1.63059e-05
RCEA043390	BX284604	him-8	CAB05281.2, CELE_T07G12.12, EnsemblGenomes-Gn:WBGene00001867, EnsemblGenomes-Tr:T07G12.12a, GI:51014229, GOA:O18068, him-8, InterPro:IPR007087, InterPro:IPR015880, UniProtKB/TrEMBL:O18068, WormBase:WBGene00001867		2.62287	112.751	0.672584	3.8997	9.63117e-05	0.000456731
RCEA004443	BX284601	pbrm-1	CAA96600.2, CELE_C26C6.1, EnsemblGenomes-Gn:WBGene00007042, EnsemblGenomes-Tr:C26C6.1a, GI:18958139, GOA:G5EEY5, InterPro:IPR001025, InterPro:IPR001487, InterPro:IPR007087, InterPro:IPR009071, InterPro:IPR015880, pbrm-1, UniProtKB/TrEMBL:G5EEY5, WormBase:WBGene00007042	Bromodomain protein brd1	2.62165	784.721	0.385103	6.80766	9.92002e-12	2.44515e-10
RCEA026273	BX284603	C02F5.12	C02F5.12, CCD62637.1, CELE_C02F5.12, EnsemblGenomes-Gn:WBGene00015352, EnsemblGenomes-Tr:C02F5.12, GI:351020648, WormBase:WBGene00015352		2.62076	31.791	1.02758	2.55041	0.0107597	0.0272652
RCEA078398	BX284605	C50F4.9	C50F4.9, CAA94744.2, CELE_C50F4.9, EnsemblGenomes-Gn:WBGene00008234, EnsemblGenomes-Tr:C50F4.9, GI:109637998, GOA:Q18744, UniProtKB/TrEMBL:Q18744, WormBase:WBGene00008234		2.61892	24.096	1.00497	2.60596	0.00916175	0.0237997
RCEA039604	BX284604	C17H12.2	C17H12.2, CCD64992.1, CELE_C17H12.2, EnsemblGenomes-Gn:WBGene00015928, EnsemblGenomes-Tr:C17H12.2.1, EnsemblGenomes-Tr:C17H12.2.2, GI:352645608, GOA:O45086, InterPro:IPR018795, UniProtKB/TrEMBL:O45086, WormBase:WBGene00015928		2.61864	497.165	0.536966	4.87673	1.07859e-06	8.60417e-06
RCEA092994	BX284606	mom-1	CCD74393.1, CELE_T07H6.2, EnsemblGenomes-Gn:WBGene00003394, EnsemblGenomes-Tr:T07H6.2, GI:351064961, mom-1, WormBase:WBGene00003394		2.61617	54.3836	0.877286	2.98212	0.00286261	0.00878048
RCEA096926	BX284606	pgp-4	CAA91463.2, CELE_F42E11.1, EnsemblGenomes-Gn:WBGene00003998, EnsemblGenomes-Tr:F42E11.1a, GI:262225499, GOA:Q20331, InterPro:IPR003439, InterPro:IPR003593, InterPro:IPR011527, InterPro:IPR017871, InterPro:IPR027417, pgp-4, UniProtKB/TrEMBL:Q20331, WormBase:WBGene00003998		2.61504	142.246	0.702051	3.72486	0.000195426	0.000847127
RCEA027486	BX284603	mcm-6	CAA80191.1, CELE_ZK632.1, GI:3881705, mcm-6, WormBase:WBGene00003158	DNA replication licensing factor MCM6	2.61322	2115.07	0.501936	5.20627	1.92677e-07	1.85602e-06
RCEA004500	BX284601	prg-1	CAA98113.1, CELE_D2030.6, EnsemblGenomes-Gn:WBGene00004178, EnsemblGenomes-Tr:D2030.6, GI:3875393, GOA:P90786, InterPro:IPR003100, InterPro:IPR003165, InterPro:IPR012337, InterPro:IPR032474, prg-1, UniProtKB/TrEMBL:P90786, WormBase:WBGene00004178		2.61167	3371.72	0.39812	6.56001	5.38054e-11	1.12573e-09
RCEA004643	BX284601	F30F8.1	CAB03029.1, CELE_F30F8.1, EnsemblGenomes-Gn:WBGene00009270, EnsemblGenomes-Tr:F30F8.1, F30F8.1, GI:3876487, UniProtKB/TrEMBL:Q93649, WormBase:WBGene00009270		2.6115	439.919	0.440852	5.92376	3.14663e-09	4.49498e-08
RCEA044888	BX284604	B0001.3	B0001.3, CAA93452.4, CELE_B0001.3, EnsemblGenomes-Gn:WBGene00007088, EnsemblGenomes-Tr:B0001.3a, GI:18369673, UniProtKB/TrEMBL:Q17412, WormBase:WBGene00007088		2.60947	375.779	0.573293	4.55172	5.32079e-06	3.57842e-05
RCEA081619	BX284605	W04D2.4	CAA99942.1, CELE_W04D2.4, EnsemblGenomes-Gn:WBGene00012243, EnsemblGenomes-Tr:W04D2.4, GI:3880463, GOA:Q23159, InterPro:IPR007087, InterPro:IPR015880, UniProtKB/TrEMBL:Q23159, W04D2.4, WormBase:WBGene00012243		2.60856	372.928	0.484131	5.38812	7.11975e-08	7.53166e-07
RCEA003734	BX284601	uri-1	CCD68093.1, CELE_C55B7.5, EnsemblGenomes-Gn:WBGene00016944, EnsemblGenomes-Tr:C55B7.5.1, EnsemblGenomes-Tr:C55B7.5.2, GI:351060424, GOA:Q966M4, InterPro:IPR004127, InterPro:IPR009053, UniProtKB/TrEMBL:Q966M4, uri-1, WormBase:WBGene00016944		2.60834	287.346	0.661689	3.94194	8.0824e-05	0.000393046
RCEA045359	BX284604	vha-7	CAQ48388.2, CELE_C26H9A.1, EnsemblGenomes-Gn:WBGene00006916, EnsemblGenomes-Tr:C26H9A.1b, GI:225878083, GOA:B2MZD0, InterPro:IPR002490, UniProtKB/TrEMBL:B2MZD0, vha-7, WormBase:WBGene00006916		2.60139	650.167	0.41317	6.29617	3.0508e-10	5.47221e-09
RCEA021306	BX284603	Y50D7A.8	CCD73795.1, CELE_Y50D7A.8, EnsemblGenomes-Gn:WBGene00021756, EnsemblGenomes-Tr:Y50D7A.8, GI:351059423, UniProtKB/TrEMBL:Q9N3K5, WormBase:WBGene00021756, Y50D7A.8		2.60031	106.34	0.592356	4.38977	1.13471e-05	6.94406e-05
RCEA014691	BX284602	atg-16.2	atg-16.2, CCD72613.1, CELE_K06A1.5, EnsemblGenomes-Gn:WBGene00019427, EnsemblGenomes-Tr:K06A1.5, GI:351064271, WormBase:WBGene00019427		2.60015	375.897	0.413492	6.28828	3.21005e-10	5.69689e-09
RCEA017879	BX284602	ZK970.7	CAA88891.1, CELE_ZK970.7, EnsemblGenomes-Gn:WBGene00014173, EnsemblGenomes-Tr:ZK970.7, GI:3881901, InterPro:IPR003677, UniProtKB/TrEMBL:Q23683, WormBase:WBGene00014173, ZK970.7		2.59946	637.717	0.782945	3.3201	0.000899843	0.00320598
RCEA022592	BX284603	Y71H2AM.2	CCD73886.1, CELE_Y71H2AM.2, EnsemblGenomes-Gn:WBGene00022167, EnsemblGenomes-Tr:Y71H2AM.2, GI:373220620, GOA:Q9BL29, InterPro:IPR019178, UniProtKB/TrEMBL:Q9BL29, WormBase:WBGene00022167, Y71H2AM.2		2.59897	516.891	0.472244	5.50344	3.72443e-08	4.20532e-07
RCEA025873	BX284603	lin-13	CCD62760.1, CELE_C03B8.4, EnsemblGenomes-Gn:WBGene00003002, EnsemblGenomes-Tr:C03B8.4, GI:351020791, lin-13, WormBase:WBGene00003002	zinc binding protein	2.59845	711.963	0.627138	4.14334	3.42285e-05	0.000184406
RCEA032371	BX284604	set-21	CCD71897.1, CELE_Y24D9A.2, EnsemblGenomes-Gn:WBGene00021282, EnsemblGenomes-Tr:Y24D9A.2, GI:351063685, InterPro:IPR001214, set-21, UniProtKB/TrEMBL:Q966C5, WormBase:WBGene00021282		2.59681	92.7302	0.725767	3.57803	0.000346199	0.00139974
RCEA003165	BX284601	cpb-3	CCD61905.1, CELE_B0414.5, cpb-3, EnsemblGenomes-Gn:WBGene00000772, EnsemblGenomes-Tr:B0414.5, GI:351065890, WormBase:WBGene00000772		2.59666	258.549	0.471937	5.50214	3.75204e-08	4.23016e-07
RCEA095039	BX284606	kreg-1	CCD68801.1, CELE_F53A9.2, EnsemblGenomes-Gn:WBGene00018725, EnsemblGenomes-Tr:F53A9.2, GI:351061040, GOA:Q20689, kreg-1, UniProtKB/TrEMBL:Q20689, WormBase:WBGene00018725		2.59302	62.8392	0.925352	2.8022	0.00507557	0.0144027
RCEA026724	BX284603	ztf-1	CCD71238.1, CELE_F54F2.5, GI:373219922, WormBase:WBGene00018833, ztf-1		2.59117	126.725	0.640857	4.04329	5.27072e-05	0.000269887
RCEA078763	BX284605	T07C12.12	CAD44151.1, CELE_T07C12.12, EnsemblGenomes-Gn:WBGene00011576, EnsemblGenomes-Tr:T07C12.12, GI:22265941, GOA:G5EF82, InterPro:IPR013894, InterPro:IPR032199, T07C12.12, UniProtKB/TrEMBL:G5EF82, WormBase:WBGene00011576		2.58948	70.4975	0.602714	4.29636	1.73624e-05	0.00010203
RCEA040129	BX284604	rde-8	CCD66631.1, CELE_ZC477.5, EnsemblGenomes-Gn:WBGene00022620, EnsemblGenomes-Tr:ZC477.5, GI:351058843, GOA:Q23342, InterPro:IPR021869, rde-8, UniProtKB/TrEMBL:Q23342, WormBase:WBGene00022620		2.58788	293.758	0.459079	5.63711	1.72924e-08	2.1277e-07
RCEA000912	BX284601	gap-3	CCD73421.1, CELE_Y20F4.3, EnsemblGenomes-Gn:WBGene00021238, EnsemblGenomes-Tr:Y20F4.3a, gap-3, GI:373254559, GOA:Q95XA9, InterPro:IPR000980, InterPro:IPR001452, InterPro:IPR008936, UniProtKB/TrEMBL:Q95XA9, WormBase:WBGene00021238		2.58716	152.105	0.530906	4.87311	1.09856e-06	8.7404e-06
RCEA082189	BX284605	acly-2	acly-2, CAB02690.1, CELE_B0365.1, EnsemblGenomes-Gn:WBGene00007150, EnsemblGenomes-Tr:B0365.1, GI:3873757, GOA:P90731, InterPro:IPR002020, InterPro:IPR003781, InterPro:IPR005810, InterPro:IPR005811, InterPro:IPR013650, InterPro:IPR013816, InterPro:IPR014608, InterPro:IPR016040, InterPro:IPR016102, InterPro:IPR016143, InterPro:IPR017440, InterPro:IPR017866, InterPro:IPR032263, UniProtKB/TrEMBL:P90…	ATP-citrate lyase (EC 2.3.3.8)	2.58696	2283.23	0.504078	5.13206	2.86581e-07	2.64085e-06
RCEA003310	BX284601	C06A5.8	C06A5.8, CCD61219.1, CELE_C06A5.8, GI:351065259, GOA:O01481, InterPro:IPR001841, InterPro:IPR013083, InterPro:IPR017907, InterPro:IPR018957, UniProtKB/TrEMBL:O01481, WormBase:WBGene00015505		2.58574	150.928	0.593824	4.35438	1.33441e-05	8.02937e-05
RCEA078264	BX284605	K07B1.7	CCD68620.1, CELE_K07B1.7, EnsemblGenomes-Gn:WBGene00019467, EnsemblGenomes-Tr:K07B1.7b, GI:351060881, GOA:H2KZK6, InterPro:IPR000467, InterPro:IPR012677, K07B1.7, UniProtKB/TrEMBL:H2KZK6, WormBase:WBGene00019467		2.58523	59.8344	0.827543	3.12398	0.00178421	0.00583457
RCEA013088	BX284602	scc-1	CCD69206.1, CELE_F10G7.4, EnsemblGenomes-Gn:WBGene00004737, EnsemblGenomes-Tr:F10G7.4, GI:351061434, scc-1, WormBase:WBGene00004737	Double-strand-break repair protein rad21	2.58307	349.398	0.46709	5.53013	3.19991e-08	3.67356e-07
RCEA076137	BX284605	gck-2	CCD72495.1, CELE_ZC404.9, EnsemblGenomes-Gn:WBGene00022603, EnsemblGenomes-Tr:ZC404.9, gck-2, GI:351064207, GOA:Q23290, InterPro:IPR000719, InterPro:IPR001180, InterPro:IPR002290, InterPro:IPR011009, InterPro:IPR017441, UniProtKB/TrEMBL:Q23290, WormBase:WBGene00022603		2.5829	458.257	0.457196	5.64943	1.60984e-08	1.99708e-07
RCEA076530	BX284605	hyls-1	CCD63094.1, CELE_C05C8.9, EnsemblGenomes-Gn:WBGene00015466, EnsemblGenomes-Tr:C05C8.9a.1, EnsemblGenomes-Tr:C05C8.9a.2, GI:351021081, GOA:Q95X94, hyls-1, InterPro:IPR027918, UniProtKB/TrEMBL:Q95X94, WormBase:WBGene00015466		2.58247	134.149	0.745416	3.46447	0.000531282	0.00202999
RCEA043721	BX284604	fic-1	CAA93429.2, CELE_ZK593.8, EnsemblGenomes-Gn:WBGene00014004, EnsemblGenomes-Tr:ZK593.8, fic-1, GI:15718300, WormBase:WBGene00014004		2.58173	213.065	0.850527	3.03545	0.00240176	0.00755276
RCEA015868	BX284602	snpc-1.1	CCD61460.1, CELE_C06A8.2, EnsemblGenomes-Gn:WBGene00015513, EnsemblGenomes-Tr:C06A8.2, GI:351065489, InterPro:IPR019188, snpc-1.1, UniProtKB/TrEMBL:Q17694, WormBase:WBGene00015513		2.58039	302.004	0.679887	3.79531	0.000147457	0.000661552
RCEA031858	BX284604	Y37E11AM.2	CDH93107.1, CELE_Y37E11AM.2, EnsemblGenomes-Gn:WBGene00021366, EnsemblGenomes-Tr:Y37E11AM.2b.1, EnsemblGenomes-Tr:Y37E11AM.2b.2, GI:548932400, UniProtKB/TrEMBL:U4PB79, WormBase:WBGene00021366, Y37E11AM.2		2.57889	332.622	0.518019	4.97837	6.41203e-07	5.42792e-06
RCEA081958	BX284605	T07F10.3	CAB01243.2, CELE_T07F10.3, EnsemblGenomes-Gn:WBGene00011589, EnsemblGenomes-Tr:T07F10.3, GI:94960393, GOA:Q22318, InterPro:IPR000504, InterPro:IPR012677, T07F10.3, UniProtKB/TrEMBL:Q22318, WormBase:WBGene00011589		2.57781	413.681	0.448508	5.74752	9.05623e-09	1.19001e-07
RCEA016167	BX284602	ctns-1	CAA88102.2, CELE_C41C4.7, ctns-1, GI:15718122, WormBase:WBGene00008052		2.5746	1241.01	0.353374	7.28576	3.19856e-13	1.04438e-11
RCEA071731	BX284605	srp-2	CCD63233.1, CELE_C05E4.1, EnsemblGenomes-Gn:WBGene00005643, EnsemblGenomes-Tr:C05E4.1.1, EnsemblGenomes-Tr:C05E4.1.2, EnsemblGenomes-Tr:C05E4.1.3, GI:351047554, GOA:O17365, InterPro:IPR000215, InterPro:IPR023796, srp-2, UniProtKB/TrEMBL:O17365, WormBase:WBGene00005643		2.57428	134.106	0.583939	4.40847	1.04101e-05	6.4518e-05
RCEA040655	BX284604	F32E10.5	CCD70436.1, CELE_F32E10.5, EnsemblGenomes-Gn:WBGene00017992, EnsemblGenomes-Tr:F32E10.5, F32E10.5, GI:351062461, InterPro:IPR002999, UniProtKB/TrEMBL:Q19971, WormBase:WBGene00017992		2.57423	160.373	0.59806	4.30429	1.67519e-05	9.8828e-05
RCEA081127	BX284605	F10C2.4	CAB04077.1, CELE_F10C2.4, EnsemblGenomes-Gn:WBGene00008645, EnsemblGenomes-Tr:F10C2.4, F10C2.4, GI:3875739, WormBase:WBGene00008645	DNA polymerase delta catalytic subunit (EC 2.7.7.7)	2.5697	830.028	0.441315	5.82283	5.78602e-09	7.84206e-08
RCEA044890	BX284604	B0001.2	B0001.2, CAA93451.2, CELE_B0001.2, EnsemblGenomes-Gn:WBGene00007087, EnsemblGenomes-Tr:B0001.2, GI:50507722, InterPro:IPR004987, UniProtKB/TrEMBL:Q17411, WormBase:WBGene00007087		2.56906	250.382	0.734571	3.49736	0.000469882	0.00183062
RCEA001750	BX284601	tag-63	CCD72581.1, CELE_Y47G6A.28, EnsemblGenomes-Gn:WBGene00006440, EnsemblGenomes-Tr:Y47G6A.28, GI:373220181, tag-63, UniProtKB/TrEMBL:Q95XZ1, WormBase:WBGene00006440		2.56589	302.375	0.465425	5.51301	3.5275e-08	4.00393e-07
RCEA025921	BX284603	bath-15	bath-15, CCD63644.1, CELE_C08C3.2, EnsemblGenomes-Gn:WBGene00015590, EnsemblGenomes-Tr:C08C3.2, GI:373253912, WormBase:WBGene00015590		2.56529	86.2273	0.677747	3.78503	0.000153691	0.000685725
RCEA043947	BX284604	C08F8.3	C08F8.3, CDG24150.1, CELE_C08F8.3, EnsemblGenomes-Gn:WBGene00007445, EnsemblGenomes-Tr:C08F8.3b, GI:526478857, UniProtKB/TrEMBL:S6FN37, WormBase:WBGene00007445		2.56523	192.995	0.518163	4.95062	7.39767e-07	6.13828e-06
RCEA019277	BX284602	set-24	CAB55043.3, CELE_Y43F11A.5, EnsemblGenomes-Gn:WBGene00012845, EnsemblGenomes-Tr:Y43F11A.5, GI:148473079, InterPro:IPR001214, InterPro:IPR006570, set-24, UniProtKB/TrEMBL:Q9U2G8, WormBase:WBGene00012845		2.56484	166.975	0.632512	4.05501	5.01327e-05	0.000258106
RCEA043985	BX284604	sdz-27	CAB03227.1, CELE_R07H5.4, EnsemblGenomes-Gn:WBGene00011124, EnsemblGenomes-Tr:R07H5.4, GI:3879006, GOA:Q93932, sdz-27, UniProtKB/TrEMBL:Q93932, WormBase:WBGene00011124		2.56483	213.105	0.822948	3.11664	0.00182924	0.00596758
RCEA070865	BX284604	ZK550.4	CAB05314.1, CELE_ZK550.4, EnsemblGenomes-Gn:WBGene00013998, EnsemblGenomes-Tr:ZK550.4, GI:3881747, GOA:G5EG49, InterPro:IPR002853, InterPro:IPR013083, InterPro:IPR017919, InterPro:IPR021600, InterPro:IPR024550, UniProtKB/TrEMBL:G5EG49, WormBase:WBGene00013998, ZK550.4		2.56412	293.095	0.602364	4.25676	2.07412e-05	0.000118921
RCEA028193	BX284603	dpy-28	CAA16340.3, CELE_Y39A1B.3, dpy-28, EnsemblGenomes-Gn:WBGene00001087, EnsemblGenomes-Tr:Y39A1B.3, GI:23304640, GOA:Q9U2M1, InterPro:IPR007673, InterPro:IPR011989, InterPro:IPR016024, InterPro:IPR026971, UniProtKB/TrEMBL:Q9U2M1, WormBase:WBGene00001087		2.56304	323.898	0.459513	5.57772	2.43687e-08	2.88542e-07
RCEA100283	BX284606	F53H4.6	CAD89731.2, CELE_F53H4.6, EnsemblGenomes-Gn:WBGene00010011, EnsemblGenomes-Tr:F53H4.6, F53H4.6, GI:154147305, GOA:Q86D18, InterPro:IPR000330, InterPro:IPR001650, InterPro:IPR027417, UniProtKB/TrEMBL:Q86D18, WormBase:WBGene00010011		2.5627	34.7391	0.806095	3.17916	0.00147704	0.00494258
RCEA004214	BX284601	xpa-1	CAA95829.1, CELE_K07G5.2, EnsemblGenomes-Gn:WBGene00006963, EnsemblGenomes-Tr:K07G5.2, GI:3878401, GOA:Q21302, InterPro:IPR000465, InterPro:IPR009061, InterPro:IPR022652, InterPro:IPR022656, UniProtKB/TrEMBL:Q21302, WormBase:WBGene00006963, xpa-1	DNA REPAIR PROTEIN (RAD14/XPA FAMILY)	2.56106	216.879	0.587041	4.36266	1.28493e-05	7.76878e-05
RCEA022754	BX284603	R148.4	CCE67222.1, CELE_R148.4, EnsemblGenomes-Gn:WBGene00020103, EnsemblGenomes-Tr:R148.4a.1, EnsemblGenomes-Tr:R148.4a.2, GI:358246663, GOA:H2KZA9, R148.4, UniProtKB/TrEMBL:H2KZA9, WormBase:WBGene00020103		2.5605	99.1521	0.778975	3.28701	0.00101256	0.00354478
RCEA028094	BX284603	rabx-5	CAD56609.2, CELE_Y39A1A.5, EnsemblGenomes-Gn:WBGene00012644, EnsemblGenomes-Tr:Y39A1A.5, GI:269991360, GOA:Q8I100, InterPro:IPR002653, InterPro:IPR003123, rabx-5, UniProtKB/TrEMBL:Q8I100, WormBase:WBGene00012644		2.56045	232.493	0.570085	4.49134	7.07759e-06	4.59601e-05
RCEA006025	BX284601	C04F12.1	C04F12.1, CAB03833.1, CELE_C04F12.1, EnsemblGenomes-Gn:WBGene00007297, EnsemblGenomes-Tr:C04F12.1, GI:3873970, GOA:Q9XVF1, InterPro:IPR003165, InterPro:IPR012337, InterPro:IPR032474, UniProtKB/TrEMBL:Q9XVF1, WormBase:WBGene00007297		2.55857	579.353	0.496013	5.15828	2.49235e-07	2.32655e-06
RCEA016070	BX284602	swsn-7	CAA86663.1, CELE_C08B11.3, EnsemblGenomes-Gn:WBGene00007433, EnsemblGenomes-Tr:C08B11.3, GI:3874171, swsn-7, WormBase:WBGene00007433		2.55846	496.686	0.4831	5.29593	1.18414e-07	1.19724e-06
RCEA000211	BX284601	Y65B4BL.3	CCD73495.1, CELE_Y65B4BL.3, GI:351051111, GOA:Q9N305, UniProtKB/TrEMBL:Q9N305, WormBase:WBGene00022035, Y65B4BL.3	Hypothetical protein	2.55676	67.899	1.01037	2.53051	0.0113896	0.0285544
RCEA041925	BX284604	cpna-3	CAA92434.2, CELE_C01F6.1, cpna-3, EnsemblGenomes-Gn:WBGene00007221, EnsemblGenomes-Tr:C01F6.1, GI:604719460, InterPro:IPR000008, InterPro:IPR002035, InterPro:IPR010734, UniProtKB/TrEMBL:Q17559, WormBase:WBGene00007221		2.55534	405.665	0.610942	4.18263	2.88157e-05	0.000158467
RCEA042201	BX284604	C10C5.2	C10C5.2, CAA92443.2, CELE_C10C5.2, EnsemblGenomes-Gn:WBGene00007506, EnsemblGenomes-Tr:C10C5.2, GI:222350549, GOA:Q17896, UniProtKB/TrEMBL:Q17896, WormBase:WBGene00007506		2.55478	257.133	0.619814	4.12185	3.75841e-05	0.00020055
RCEA024185	BX284603	ztf-8	CCD66666.1, CELE_ZC395.8, EnsemblGenomes-Gn:WBGene00022598, EnsemblGenomes-Tr:ZC395.8, GI:373219245, GOA:Q9GYG1, InterPro:IPR007087, InterPro:IPR015880, UniProtKB/TrEMBL:Q9GYG1, WormBase:WBGene00022598, ztf-8		2.55426	345.408	0.554037	4.61027	4.0215e-06	2.7866e-05
RCEA003401	BX284601	T27A3.7	CCD72007.1, CELE_T27A3.7, EnsemblGenomes-Gn:WBGene00020843, EnsemblGenomes-Tr:T27A3.7, GI:351063784, GOA:P91501, InterPro:IPR002219, InterPro:IPR011513, T27A3.7, UniProtKB/TrEMBL:P91501, WormBase:WBGene00020843		2.5505	225.374	0.436827	5.83869	5.26132e-09	7.20863e-08
RCEA040223	BX284604	C42D4.1	C42D4.1, CCD66613.1, CELE_C42D4.1, EnsemblGenomes-Gn:WBGene00016594, EnsemblGenomes-Tr:C42D4.1, GI:351059520, InterPro:IPR003677, UniProtKB/TrEMBL:Q18577, WormBase:WBGene00016594		2.5454	5461.78	0.417442	6.09761	1.07666e-09	1.71686e-08
RCEA019166	BX284602	ZK930.2	CAA94171.2, CELE_ZK930.2, EnsemblGenomes-Gn:WBGene00014152, EnsemblGenomes-Tr:ZK930.2, GI:320202830, InterPro:IPR018482, UniProtKB/TrEMBL:Q23665, WormBase:WBGene00014152, ZK930.2		2.54369	455.109	0.474002	5.36642	8.03159e-08	8.39616e-07
RCEA022598	BX284603	josd-1	CCD72485.1, CELE_Y71H2AR.3, EnsemblGenomes-Gn:WBGene00022190, EnsemblGenomes-Tr:Y71H2AR.3, GI:351064197, GOA:Q8IAA2, InterPro:IPR006155, josd-1, UniProtKB/TrEMBL:Q8IAA2, WormBase:WBGene00022190		2.54243	34.0429	0.885373	2.87159	0.00408415	0.0119375
RCEA019116	BX284602	K12D12.5	CAA88868.1, CELE_K12D12.5, EnsemblGenomes-Gn:WBGene00010787, EnsemblGenomes-Tr:K12D12.5, GI:3878528, GOA:G5ED63, InterPro:IPR002156, InterPro:IPR012337, K12D12.5, UniProtKB/TrEMBL:G5ED63, WormBase:WBGene00010787		2.54241	108.688	0.665285	3.82153	0.000132626	0.000605894
RCEA098300	BX284606	K08H2.10	CAR97843.1, CELE_K08H2.10, EnsemblGenomes-Gn:WBGene00164968, EnsemblGenomes-Tr:K08H2.10, GI:211970432, K08H2.10, UniProtKB/TrEMBL:B6VQ77, WormBase:WBGene00164968		2.54168	60.7578	0.812831	3.12695	0.00176629	0.00578348
RCEA015759	BX284602	lir-1	CCD62036.1, CELE_F18A1.3, GI:351018131, GOA:G5EBR0, InterPro:IPR015880, lir-1, UniProtKB/TrEMBL:G5EBR0, WormBase:WBGene00003044		2.54128	463.626	0.547172	4.6444	3.41073e-06	2.40088e-05
RCEA000437	BX284601	gpa-16	CCD73543.1, CELE_Y95B8A.5, EnsemblGenomes-Gn:WBGene00001678, EnsemblGenomes-Tr:Y95B8A.5a, GI:351051164, gpa-16, WormBase:WBGene00001678	Methenyltetrahydrofolate cyclohydrolase (EC 3.5.4.9) / Methylenetetrahydrofolate dehydrogenase (NADP+) (EC 1.5.1.5)	2.5394	326.299	0.499433	5.08457	3.68456e-07	3.29666e-06
RCEA078445	BX284605	rtfo-1	CAA94759.1, CELE_F25B3.6, EnsemblGenomes-Gn:WBGene00009103, EnsemblGenomes-Tr:F25B3.6, GI:3876239, rtfo-1, WormBase:WBGene00009103		2.53557	863.286	0.518386	4.89128	1.00183e-06	8.06869e-06
RCEA041366	BX284604	M116.2	CELE_M116.2, M116.2		2.53523	80.4027	0.544202	4.65862	3.18342e-06	2.25773e-05
RCEA013766	BX284602	F12A10.1	CCD69297.1, CELE_F12A10.1, EnsemblGenomes-Gn:WBGene00017390, EnsemblGenomes-Tr:F12A10.1, F12A10.1, GI:351061508, GOA:B3WFT6, UniProtKB/TrEMBL:B3WFT6, WormBase:WBGene00017390		2.53235	57.172	0.98589	2.56859	0.0102112	0.0261256
RCEA031880	BX284604	best-20	best-20, CCD74046.2, CELE_Y37E11AR.1, EnsemblGenomes-Gn:WBGene00021368, EnsemblGenomes-Tr:Y37E11AR.1, GI:548932396, GOA:Q965X4, InterPro:IPR000615, InterPro:IPR021134, UniProtKB/TrEMBL:Q965X4, WormBase:WBGene00021368	Bestrophin family chloride channel	2.53063	121.513	0.840121	3.01223	0.00259339	0.0080654
RCEA000883	BX284601	hex-4	CCD73477.2, CELE_Y51F10.5, EnsemblGenomes-Gn:WBGene00021766, EnsemblGenomes-Tr:Y51F10.5, GI:373220553, GOA:Q8WTK2, hex-4, InterPro:IPR013781, InterPro:IPR015883, InterPro:IPR017853, UniProtKB/TrEMBL:Q8WTK2, WormBase:WBGene00021766	Hypothetical protein	2.52976	273.655	0.510245	4.95793	7.12476e-07	5.96101e-06
RCEA081928	BX284605	ZC443.4	CAA99946.1, CELE_ZC443.4, EnsemblGenomes-Gn:WBGene00013899, EnsemblGenomes-Tr:ZC443.4, GI:3881393, GOA:Q23319, UniProtKB/TrEMBL:Q23319, WormBase:WBGene00013899, ZC443.4		2.52965	104.999	0.751445	3.36638	0.000761605	0.0027744
RCEA003037	BX284601	M01E11.3	CCD71341.1, CELE_M01E11.3, EnsemblGenomes-Gn:WBGene00019712, EnsemblGenomes-Tr:M01E11.3, GI:373254428, InterPro:IPR013894, M01E11.3, UniProtKB/TrEMBL:P91399, WormBase:WBGene00019712		2.52945	100.904	0.772463	3.27452	0.00105841	0.00367714
RCEA024282	BX284603	F48E8.2	CCD71511.1, CELE_F48E8.2, EnsemblGenomes-Gn:WBGene00018609, EnsemblGenomes-Tr:F48E8.2, F48E8.2, GI:373254463, GOA:Q09395, InterPro:IPR019370, UniProtKB/TrEMBL:Q09395, WormBase:WBGene00018609		2.52795	291.405	0.676148	3.73875	0.000184934	0.000806982
RCEA016287	BX284602	gei-14	CAA88863.2, CELE_K01C8.5, EnsemblGenomes-Gn:WBGene00001571, EnsemblGenomes-Tr:K01C8.5, gei-14, GI:37619800, UniProtKB/TrEMBL:Q21088, WormBase:WBGene00001571		2.52792	142.507	0.642632	3.9337	8.36473e-05	0.00040417
RCEA015270	BX284602	ZK1127.13	CCD73728.1, CELE_ZK1127.13, EnsemblGenomes-Gn:WBGene00195239, EnsemblGenomes-Tr:ZK1127.13, GI:373220463, GOA:E1B6Q6, InterPro:IPR013924, UniProtKB/TrEMBL:E1B6Q6, WormBase:WBGene00195239, ZK1127.13		2.52327	83.2171	0.64388	3.91885	8.89728e-05	0.000426351
RCEA015191	BX284602	ceh-38	CCD61547.1, ceh-38, CELE_F22D3.1, EnsemblGenomes-Gn:WBGene00000459, EnsemblGenomes-Tr:F22D3.1b, GI:373218561, WormBase:WBGene00000459		2.52242	358.169	0.451539	5.58626	2.32006e-08	2.76884e-07
RCEA005072	BX284601	D1081.9	CAB54207.1, CELE_D1081.9, D1081.9, EnsemblGenomes-Gn:WBGene00008387, EnsemblGenomes-Tr:D1081.9, GI:5824420, GOA:Q9U3L0, InterPro:IPR001841, InterPro:IPR013083, UniProtKB/TrEMBL:Q9U3L0, WormBase:WBGene00008387		2.5215	49.1392	1.09741	2.29768	0.0215797	0.0488418
RCEA081390	BX284605	R04F11.3	CAA98958.4, CELE_R04F11.3, EnsemblGenomes-Gn:WBGene00011016, EnsemblGenomes-Tr:R04F11.3, GI:20095253, R04F11.3, UniProtKB/TrEMBL:Q21730, WormBase:WBGene00011016		2.52147	568.7	0.594089	4.24426	2.19318e-05	0.000124799
RCEA025219	BX284603	R05H11.1	CCD70184.1, CELE_R05H11.1, EnsemblGenomes-Gn:WBGene00019907, EnsemblGenomes-Tr:R05H11.1, GI:351062257, GOA:Q21761, InterPro:IPR001810, InterPro:IPR012885, R05H11.1, UniProtKB/TrEMBL:Q21761, WormBase:WBGene00019907		2.51963	31.4148	1.00324	2.5115	0.012022	0.0298374
RCEA003110	BX284601	unc-40	CCD62978.1, CELE_T19B4.7, EnsemblGenomes-Gn:WBGene00006776, EnsemblGenomes-Tr:T19B4.7, GI:351020990, GOA:G5EF96, InterPro:IPR003598, InterPro:IPR003599, InterPro:IPR003961, InterPro:IPR007110, InterPro:IPR013098, InterPro:IPR013783, unc-40, UniProtKB/TrEMBL:G5EF96, WormBase:WBGene00006776		2.51671	372.019	0.565147	4.4532	8.46003e-06	5.38479e-05
RCEA002618	BX284601	him-1	CCD69832.1, CELE_F28B3.7, GI:351061958, him-1, WormBase:WBGene00001860	Chromosome segregation protein SMC1	2.51577	787.632	0.529418	4.75194	2.01472e-06	1.49862e-05
RCEA041554	BX284604	pole-2	CCD67651.2, CELE_F08B4.5, EnsemblGenomes-Gn:WBGene00017237, EnsemblGenomes-Tr:F08B4.5, GI:604719503, pole-2, WormBase:WBGene00017237	DNA polymerase epsilon subunit B (EC 2.7.7.7)	2.51459	233.447	0.513794	4.89417	9.87232e-07	7.95534e-06
RCEA045953	BX284604	cyp-31A5	CCH63815.1, CELE_Y62E10A.15, cyp-31A5, EnsemblGenomes-Gn:WBGene00013381, EnsemblGenomes-Tr:Y62E10A.15b, GI:387910757, GOA:I2HAA8, InterPro:IPR001128, UniProtKB/TrEMBL:I2HAA8, WormBase:WBGene00013381		2.51329	212.934	0.57417	4.37725	1.20184e-05	7.32221e-05
RCEA012293	BX284602	C16C8.16	C16C8.16, CCD64710.1, CELE_C16C8.16, EnsemblGenomes-Gn:WBGene00015853, EnsemblGenomes-Tr:C16C8.16, GI:351058091, InterPro:IPR000626, InterPro:IPR029071, UniProtKB/TrEMBL:P91055, WormBase:WBGene00015853		2.51303	136.982	0.499266	5.03346	4.81711e-07	4.16663e-06
RCEA029050	BX284603	ani-1	ani-1, CAB11565.2, CELE_Y49E10.19, EnsemblGenomes-Gn:WBGene00013038, EnsemblGenomes-Tr:Y49E10.19, GI:30145766, WormBase:WBGene00013038		2.50811	999.836	0.337724	7.42652	1.11496e-13	4.05281e-12
RCEA079334	BX284605	C35A5.8	C35A5.8, CAA94911.2, CELE_C35A5.8, EnsemblGenomes-Gn:WBGene00007952, EnsemblGenomes-Tr:C35A5.8, GI:163263165, GOA:Q18476, InterPro:IPR016024, UniProtKB/TrEMBL:Q18476, WormBase:WBGene00007952	stromal cell protein	2.50768	1887.12	0.438588	5.71761	1.08033e-08	1.39407e-07
RCEA084372	BX284605	F28F8.9	CBM41201.1, CELE_F28F8.9, F28F8.9, GI:297374695, UniProtKB/TrEMBL:D7SFP0, WormBase:WBGene00044188		2.50542	75.0418	0.762993	3.28367	0.00102463	0.00357709
RCEA012113	BX284602	F02E11.2	CCD64923.1, CELE_F02E11.2, EnsemblGenomes-Gn:WBGene00017180, EnsemblGenomes-Tr:F02E11.2a, F02E11.2, GI:373218996, UniProtKB/TrEMBL:G4S102, WormBase:WBGene00017180		2.50498	35.9553	0.888561	2.81914	0.00481526	0.0137755
RCEA024092	BX284603	sax-2	CCD69845.1, CELE_F21H11.2, EnsemblGenomes-Gn:WBGene00004728, EnsemblGenomes-Tr:F21H11.2a, GI:351061972, GOA:Q5DX48, InterPro:IPR016024, InterPro:IPR025481, InterPro:IPR025614, sax-2, UniProtKB/TrEMBL:Q5DX48, WormBase:WBGene00004728		2.4995	454.475	0.463105	5.39727	6.76631e-08	7.1779e-07
RCEA049254	BX284604	nkcc-1	CCG28056.1, CELE_Y37A1C.1, EnsemblGenomes-Gn:WBGene00012543, EnsemblGenomes-Tr:Y37A1C.1g, GI:379657265, GOA:H8ESD5, InterPro:IPR004841, InterPro:IPR004842, InterPro:IPR018491, nkcc-1, UniProtKB/TrEMBL:H8ESD5, WormBase:WBGene00012543	Bumetanide-sensitive sodium-(Potassium)-chloride cotransporter	2.49561	816.674	0.337711	7.38979	1.47066e-13	5.17131e-12
RCEA035355	BX284604	cec-6	CCD70523.1, cec-6, CELE_T12E12.2, EnsemblGenomes-Gn:WBGene00020463, EnsemblGenomes-Tr:T12E12.2, GI:373219847, GOA:Q22430, InterPro:IPR000953, InterPro:IPR016197, InterPro:IPR023780, UniProtKB/TrEMBL:Q22430, WormBase:WBGene00020463		2.49498	150.727	0.634339	3.93319	8.38255e-05	0.000404803
RCEA027240	BX284603	F55H2.7	CAA81604.3, CELE_F55H2.7, EnsemblGenomes-Gn:WBGene00010132, EnsemblGenomes-Tr:F55H2.7.1, EnsemblGenomes-Tr:F55H2.7.2, F55H2.7, GI:31043759, WormBase:WBGene00010132		2.49439	119.052	0.614042	4.06224	4.8604e-05	0.000251437
RCEA043930	BX284604	F01G4.4	CCH63852.1, CELE_F01G4.4, EnsemblGenomes-Gn:WBGene00008503, EnsemblGenomes-Tr:F01G4.4b, F01G4.4, GI:387912155, UniProtKB/TrEMBL:I2HAE5, WormBase:WBGene00008503		2.49406	300.805	0.483103	5.1626	2.43549e-07	2.28763e-06
RCEA017405	BX284602	ZK1307.9	CAA87435.1, CELE_ZK1307.9, EnsemblGenomes-Gn:WBGene00014250, EnsemblGenomes-Tr:ZK1307.9, GI:3881615, WormBase:WBGene00014250, ZK1307.9	Hypothetical protein	2.48816	392.808	0.407833	6.10092	1.05459e-09	1.687e-08
RCEA097191	BX284606	C44C10.4	C44C10.4, CAA93638.2, CELE_C44C10.4, EnsemblGenomes-Gn:WBGene00008085, EnsemblGenomes-Tr:C44C10.4, GI:22265835, InterPro:IPR003395, InterPro:IPR027417, UniProtKB/TrEMBL:Q18616, WormBase:WBGene00008085		2.48799	85.9982	0.757219	3.2857	0.0010173	0.00355888
RCEA014977	BX284602	F41G3.10	CCD71053.1, CELE_F41G3.10, EnsemblGenomes-Gn:WBGene00018303, EnsemblGenomes-Tr:F41G3.10, F41G3.10, GI:351063002, InterPro:IPR003582, InterPro:IPR007026, UniProtKB/TrEMBL:Q20289, WormBase:WBGene00018303		2.48658	314.726	0.686065	3.62441	0.00028962	0.00119467
RCEA027642	BX284603	K03H1.11	CAA82663.1, CELE_K03H1.11, EnsemblGenomes-Gn:WBGene00010546, EnsemblGenomes-Tr:K03H1.11, GI:3878177, GOA:Q21199, K03H1.11, UniProtKB/TrEMBL:Q21199, WormBase:WBGene00010546		2.4848	213.485	0.653038	3.80498	0.000141816	0.00064047
RCEA081860	BX284605	scc-3	CAA99836.1, CELE_F18E2.3, EnsemblGenomes-Gn:WBGene00004738, EnsemblGenomes-Tr:F18E2.3, GI:3876096, scc-3, WormBase:WBGene00004738		2.48286	821.66	0.407481	6.0932	1.10679e-09	1.75922e-08
RCEA025047	BX284603	algn-1	algn-1, CCD63217.1, CELE_T26A5.4, EnsemblGenomes-Gn:WBGene00020820, EnsemblGenomes-Tr:T26A5.4, GI:351047536, GOA:Q22797, InterPro:IPR026051, UniProtKB/TrEMBL:Q22797, WormBase:WBGene00020820	Beta-mannosyltransferase (EC 2.4.1.142)	2.48193	445.372	0.447734	5.54332	2.96791e-08	3.45188e-07
RCEA041820	BX284604	col-119	CAA92453.1, CELE_C53B4.5, col-119, EnsemblGenomes-Gn:WBGene00000693, EnsemblGenomes-Tr:C53B4.5, GI:3875169, GOA:Q18799, InterPro:IPR002486, UniProtKB/TrEMBL:Q18799, WormBase:WBGene00000693		2.48037	5130.36	0.851802	2.91191	0.00359221	0.0106712
RCEA038837	BX284604	htp-2	CCD74149.1, CELE_Y73B6BL.2, EnsemblGenomes-Gn:WBGene00002033, EnsemblGenomes-Tr:Y73B6BL.2, GI:351059306, GOA:Q95XC8, htp-2, InterPro:IPR003511, PDB:4TZL, PDB:4TZM, PDB:4TZN, PDB:4TZS, UniProtKB/TrEMBL:Q95XC8, WormBase:WBGene00002033		2.48013	356.071	0.457662	5.41914	5.98872e-08	6.40738e-07
RCEA021620	BX284603	fbxa-60	CCD73259.1, CELE_T12B5.10, EnsemblGenomes-Gn:WBGene00020456, EnsemblGenomes-Tr:T12B5.10, fbxa-60, GI:351064778, GOA:Q9TZ26, InterPro:IPR001810, InterPro:IPR002900, UniProtKB/TrEMBL:Q9TZ26, WormBase:WBGene00020456	Hypothetical protein	2.47971	475.477	0.576205	4.30352	1.68103e-05	9.9095e-05
RCEA002504	BX284601	viln-1	CCD64214.1, CELE_C10H11.1, EnsemblGenomes-Gn:WBGene00015691, EnsemblGenomes-Tr:C10H11.1, GI:351050094, GOA:P91041, InterPro:IPR003128, InterPro:IPR007122, InterPro:IPR007123, InterPro:IPR015628, InterPro:IPR029006, UniProtKB/TrEMBL:P91041, viln-1, WormBase:WBGene00015691	supervillin	2.47824	622.688	0.681287	3.63758	0.000275209	0.00114084
RCEA035055	BX284604	T11F8.1	CCD61592.1, CELE_T11F8.1, EnsemblGenomes-Gn:WBGene00020433, EnsemblGenomes-Tr:T11F8.1, GI:351065610, GOA:O44194, T11F8.1, UniProtKB/TrEMBL:O44194, WormBase:WBGene00020433		2.47642	46.0146	0.988283	2.50578	0.0122181	0.0302494
RCEA027259	BX284603	mut-7	CAA80137.1, CELE_ZK1098.8, EnsemblGenomes-Gn:WBGene00003504, EnsemblGenomes-Tr:ZK1098.8, GI:3881488, mut-7, WormBase:WBGene00003504		2.47604	321.301	0.688204	3.59783	0.000320881	0.00130824
RCEA026358	BX284603	F10E9.12	CCD69138.1, CELE_F10E9.12, EnsemblGenomes-Gn:WBGene00017361, EnsemblGenomes-Tr:F10E9.12, F10E9.12, GI:351061359, UniProtKB/TrEMBL:Q95QL4, WormBase:WBGene00017361		2.47433	209.134	0.694457	3.56297	0.000366682	0.0014719
RCEA098804	BX284606	ekl-5	CAA19472.2, CELE_Y26E6A.1, ekl-5, EnsemblGenomes-Gn:WBGene00012512, EnsemblGenomes-Tr:Y26E6A.1, GI:269991218, UniProtKB/TrEMBL:O62418, WormBase:WBGene00012512		2.4721	141.602	0.505946	4.8861	1.0285e-06	8.25266e-06
RCEA003298	BX284601	C06A5.3	C06A5.3, CCD61213.1, CELE_C06A5.3, EnsemblGenomes-Gn:WBGene00015501, EnsemblGenomes-Tr:C06A5.3b, GI:351065253, InterPro:IPR000313, UniProtKB/TrEMBL:Q5TYK5, WormBase:WBGene00015501		2.47191	378.051	0.452791	5.45928	4.78075e-08	5.2411e-07
RCEA045551	BX284604	C32H11.1	C32H11.1, CCG28076.1, CELE_C32H11.1, EnsemblGenomes-Gn:WBGene00007864, EnsemblGenomes-Tr:C32H11.1a, GI:379657168, InterPro:IPR000859, InterPro:IPR003366, UniProtKB/TrEMBL:H9G327, WormBase:WBGene00007864		2.47031	34.1392	1.03557	2.38546	0.0170578	0.0400555
RCEA023960	BX284603	fsn-1	CCD65729.1, CELE_C26E6.5, EnsemblGenomes-Gn:WBGene00001499, EnsemblGenomes-Tr:C26E6.5, fsn-1, GI:351058295, WormBase:WBGene00001499	GARP protein	2.46911	1632.88	0.447697	5.51515	3.4849e-08	3.96453e-07
RCEA026109	BX284603	F44B9.8	CCD63451.1, CELE_F44B9.8, EnsemblGenomes-Gn:WBGene00018409, EnsemblGenomes-Tr:F44B9.8, F44B9.8, GI:351021183, WormBase:WBGene00018409	Replication factor C subunit	2.46767	480.617	0.439635	5.61299	1.9886e-08	2.41724e-07
RCEA021819	BX284603	fbxa-30	CCD73935.1, CELE_ZC47.4, EnsemblGenomes-Gn:WBGene00013837, EnsemblGenomes-Tr:ZC47.4, fbxa-30, GI:351051506, GOA:A4F332, InterPro:IPR001810, InterPro:IPR002900, UniProtKB/TrEMBL:A4F332, WormBase:WBGene00013837	Hypothetical protein	2.46619	23.0814	1.00416	2.45597	0.0140504	0.0340099
RCEA034676	BX284604	Y4C6B.1	CCD71121.1, CELE_Y4C6B.1, EnsemblGenomes-Gn:WBGene00021155, EnsemblGenomes-Tr:Y4C6B.1, GI:351063076, UniProtKB/TrEMBL:Q9UB01, WormBase:WBGene00021155, Y4C6B.1		2.46492	265.022	0.520984	4.73127	2.23117e-06	1.63782e-05
RCEA094650	BX284606	R09F10.3	CCD69416.1, CELE_R09F10.3, EnsemblGenomes-Gn:WBGene00019987, EnsemblGenomes-Tr:R09F10.3, GI:351061562, InterPro:IPR021627, R09F10.3, UniProtKB/TrEMBL:Q23026, WormBase:WBGene00019987		2.46446	129.41	0.504439	4.88555	1.03139e-06	8.27141e-06
RCEA026602	BX284603	C13G5.2	C13G5.2, CCD63317.1, CELE_C13G5.2, EnsemblGenomes-Gn:WBGene00015747, EnsemblGenomes-Tr:C13G5.2, GI:373218798, WormBase:WBGene00015747		2.4643	234.21	0.535115	4.60519	4.12092e-06	2.85026e-05
RCEA016094	BX284602	T05H10.4	CAA87791.1, CELE_T05H10.4, EnsemblGenomes-Gn:WBGene00011509, EnsemblGenomes-Tr:T05H10.4a, GI:3879497, T05H10.4, WormBase:WBGene00011509		2.46424	211.291	0.658101	3.74447	0.000180775	0.00079204
RCEA086898	BX284605	ttr-26	CAA16398.1, CELE_Y51A2D.11, EnsemblGenomes-Gn:WBGene00013079, EnsemblGenomes-Tr:Y51A2D.11.1, EnsemblGenomes-Tr:Y51A2D.11.2, GI:3881035, GOA:Q9XXR5, InterPro:IPR001534, ttr-26, UniProtKB/TrEMBL:Q9XXR5, WormBase:WBGene00013079	Hypothetical protein	2.46255	439.321	0.578569	4.25627	2.07861e-05	0.000119133
RCEA041514	BX284604	lin-49	CCD67656.1, CELE_F42A9.2, EnsemblGenomes-Gn:WBGene00003034, EnsemblGenomes-Tr:F42A9.2.1, EnsemblGenomes-Tr:F42A9.2.2, GI:351060032, lin-49, WormBase:WBGene00003034		2.45909	357.208	0.673417	3.65166	0.000260549	0.00108754
RCEA015754	BX284602	rpa-1	CCD62042.1, CELE_F18A1.5, EnsemblGenomes-Gn:WBGene00017546, EnsemblGenomes-Tr:F18A1.5, GI:351018137, rpa-1, WormBase:WBGene00017546	Replication factor-A protein 1	2.45656	2082.33	0.420938	5.83593	5.34925e-09	7.32246e-08
RCEA021343	BX284603	cec-8	CCD69158.1, cec-8, CELE_Y55B1BR.3, EnsemblGenomes-Gn:WBGene00021913, EnsemblGenomes-Tr:Y55B1BR.3, GI:351061372, GOA:Q95XW8, InterPro:IPR000953, InterPro:IPR016197, InterPro:IPR023780, UniProtKB/TrEMBL:Q95XW8, WormBase:WBGene00021913		2.45564	128.876	0.549765	4.4667	7.94341e-06	5.07954e-05
RCEA100857	BX284606	T20F7.1	CCD71068.1, CELE_T20F7.1, EnsemblGenomes-Gn:WBGene00020630, EnsemblGenomes-Tr:T20F7.1, GI:351063019, GOA:O02169, InterPro:IPR007087, InterPro:IPR015880, T20F7.1, UniProtKB/TrEMBL:O02169, WormBase:WBGene00020630		2.45437	214.3	0.827371	2.96647	0.00301244	0.00916553
RCEA024270	BX284603	skpt-1	CCD71514.1, CELE_F48E8.7, EnsemblGenomes-Gn:WBGene00018613, EnsemblGenomes-Tr:F48E8.7a, GI:373254466, GOA:Q09397, InterPro:IPR001810, skpt-1, UniProtKB/TrEMBL:Q09397, WormBase:WBGene00018613		2.45364	773.682	0.495511	4.95173	7.35568e-07	6.1156e-06
RCEA002542	BX284601	F57C9.4	CCD62436.1, CELE_F57C9.4, EnsemblGenomes-Gn:WBGene00019011, EnsemblGenomes-Tr:F57C9.4b, F57C9.4, GI:351020448, GOA:H2KYD4, InterPro:IPR007087, InterPro:IPR013087, InterPro:IPR015880, UniProtKB/TrEMBL:H2KYD4, WormBase:WBGene00019011		2.45362	252.091	0.530316	4.62671	3.71519e-06	2.59702e-05
RCEA023009	BX284603	madf-8	CAB03761.1, CELE_C46F11.3, EnsemblGenomes-Gn:WBGene00008118, EnsemblGenomes-Tr:C46F11.3, GI:3874992, GOA:Q93381, InterPro:IPR006578, madf-8, UniProtKB/TrEMBL:Q93381, WormBase:WBGene00008118		2.45349	66.9334	0.724749	3.38529	0.000711019	0.00261791
RCEA016090	BX284602	apn-1	apn-1, CAA87789.2, CELE_T05H10.2, GI:15718251, WormBase:WBGene00000151		2.45247	242.529	0.569332	4.30763	1.65015e-05	9.74649e-05
RCEA023820	BX284603	mel-28	CAA86316.2, CELE_C38D4.3, EnsemblGenomes-Gn:WBGene00003210, EnsemblGenomes-Tr:C38D4.3, GI:42794020, GOA:Q18508, InterPro:IPR017956, mel-28, UniProtKB/TrEMBL:Q18508, WormBase:WBGene00003210		2.4513	705.38	0.553755	4.42669	9.56919e-06	5.99714e-05
RCEA004956	BX284601	F52B5.2	CAA99854.2, CELE_F52B5.2, EnsemblGenomes-Gn:WBGene00009921, EnsemblGenomes-Tr:F52B5.2, F52B5.2, GI:7160696, GOA:Q20643, InterPro:IPR000719, InterPro:IPR008271, InterPro:IPR011009, UniProtKB/TrEMBL:Q20643, WormBase:WBGene00009921		2.44961	288.494	0.585354	4.18483	2.85382e-05	0.000157059
RCEA045355	BX284604	ark-1	ark-1, CAB05120.2, CELE_C01C7.1, GI:13548322, GOA:G5EBZ8, InterPro:IPR000095, InterPro:IPR000719, InterPro:IPR001245, InterPro:IPR001452, InterPro:IPR008266, InterPro:IPR011009, InterPro:IPR011511, InterPro:IPR017441, InterPro:IPR020635, UniProtKB/Swiss-Prot:G5EBZ8, WormBase:WBGene00000186	(unassigned) (EC 2.7.11.1) / activated CDC42 kinase 1 (EC 2.7.10.2)	2.447	316.217	0.491272	4.98096	6.32702e-07	5.36499e-06
RCEA025998	BX284603	ZK688.5	CCD62536.1, CELE_ZK688.5, GI:351020560, WormBase:WBGene00022800, ZK688.5		2.44687	584.29	0.407132	6.01003	1.85485e-09	2.78135e-08
RCEA031254	BX284604	Y54G2A.12	CCD83536.1, CELE_Y54G2A.12, EnsemblGenomes-Gn:WBGene00021877, EnsemblGenomes-Tr:Y54G2A.12, GI:351051368, InterPro:IPR001680, InterPro:IPR015943, InterPro:IPR017986, UniProtKB/TrEMBL:A5A8P6, WormBase:WBGene00021877, Y54G2A.12		2.44511	45.8705	0.908184	2.69231	0.00709591	0.0190364
RCEA024756	BX284603	F40H6.6	CELE_F40H6.6, EnsemblGenomes-Gn:WBGene00044412, EnsemblGenomes-Tr:F40H6.6, F40H6.6, GOA:Q4PIX0, UniProtKB/TrEMBL:Q4PIX0, WormBase:WBGene00044412		2.44464	156.064	0.62522	3.91005	9.22781e-05	0.000440651
RCEA026086	BX284603	C06G4.1	C06G4.1, CCD63431.1, CELE_C06G4.1, EnsemblGenomes-Gn:WBGene00015557, EnsemblGenomes-Tr:C06G4.1, GI:351021162, WormBase:WBGene00015557		2.44145	233.098	0.597545	4.0858	4.39261e-05	0.000229919
RCEA080643	BX284605	F35B12.3	CAA98466.2, CELE_F35B12.3, EnsemblGenomes-Gn:WBGene00009383, EnsemblGenomes-Tr:F35B12.3, F35B12.3, GI:24817321, UniProtKB/TrEMBL:Q20013, WormBase:WBGene00009383		2.4409	99.7895	0.636275	3.83624	0.000124932	0.000575451
RCEA101279	BX284606	H11L12.1	CCD61148.1, CELE_H11L12.1, EnsemblGenomes-Gn:WBGene00019189, EnsemblGenomes-Tr:H11L12.1, GI:351065201, H11L12.1, UniProtKB/TrEMBL:Q9TYV1, WormBase:WBGene00019189		2.44018	189.808	0.618191	3.94729	7.90421e-05	0.000385664
RCEA015296	BX284602	T02G5.11	CELE_T02G5.11, T02G5.11		2.43949	44.7934	0.967553	2.5213	0.0116921	0.0291612
RCEA043859	BX284604	lin-3	CAQ35042.1, CELE_F36H1.4, EnsemblGenomes-Gn:WBGene00002992, EnsemblGenomes-Tr:F36H1.4a, GI:172051538, lin-3, WormBase:WBGene00002992		2.43814	95.0357	0.903898	2.69737	0.00698904	0.0188066
RCEA030952	BX284604	T04C4.1	CCD73157.1, CELE_T04C4.1, EnsemblGenomes-Gn:WBGene00020208, EnsemblGenomes-Tr:T04C4.1a, GI:351064674, InterPro:IPR026156, InterPro:IPR028085, InterPro:IPR028086, T04C4.1, UniProtKB/TrEMBL:H2L0I8, WormBase:WBGene00020208		2.43591	225.545	0.41408	5.8827	4.0363e-09	5.6587e-08
RCEA006266	BX284601	T24D1.2	CAB03423.4, CELE_T24D1.2, EnsemblGenomes-Gn:WBGene00011985, EnsemblGenomes-Tr:T24D1.2, GI:20095259, GOA:O02331, InterPro:IPR001841, InterPro:IPR013083, T24D1.2, UniProtKB/TrEMBL:O02331, WormBase:WBGene00011985		2.43512	664.434	0.402605	6.04842	1.46271e-09	2.24923e-08
RCEA041746	BX284604	spr-2	CAE46661.1, CELE_C27B7.1, EnsemblGenomes-Gn:WBGene00005007, EnsemblGenomes-Tr:C27B7.1b, GI:34555795, GOA:Q7JMA9, InterPro:IPR002164, spr-2, UniProtKB/TrEMBL:Q7JMA9, WormBase:WBGene00005007		2.43316	1009.78	0.378319	6.43151	1.26346e-10	2.46563e-09
RCEA082228	BX284605	him-17	CAB01515.1, CELE_T09E8.2, EnsemblGenomes-Gn:WBGene00001874, EnsemblGenomes-Tr:T09E8.2, GI:3879699, GOA:Q22360, him-17, InterPro:IPR006612, InterPro:IPR018247, UniProtKB/TrEMBL:Q22360, WormBase:WBGene00001874		2.43207	762.216	0.351399	6.92109	4.48172e-12	1.17782e-10
RCEA001863	BX284601	hus-1	CCD68357.1, CELE_H26D21.1, EnsemblGenomes-Gn:WBGene00002042, EnsemblGenomes-Tr:H26D21.1, GI:351060639, GOA:G5EFI9, hus-1, InterPro:IPR007150, InterPro:IPR016580, UniProtKB/TrEMBL:G5EFI9, WormBase:WBGene00002042		2.43024	75.1673	0.711051	3.41781	0.000631282	0.002363
RCEA003747	BX284601	glh-2	CCD68088.1, CELE_C55B7.1, EnsemblGenomes-Gn:WBGene00001599, EnsemblGenomes-Tr:C55B7.1, GI:351060419, glh-2, WormBase:WBGene00001599	RNA helicase (EC 3.6.4.13)	2.42953	355.08	0.453324	5.35936	8.35176e-08	8.70072e-07
RCEA043227	BX284604	R11A8.1	CAA94366.2, CELE_R11A8.1, EnsemblGenomes-Gn:WBGene00011236, EnsemblGenomes-Tr:R11A8.1, GI:225877998, R11A8.1, UniProtKB/TrEMBL:Q21923, WormBase:WBGene00011236		2.42873	29.7175	0.96552	2.51546	0.0118876	0.0295729
RCEA087457	BX284605	nceh-1	CAA21641.2, CELE_Y43F8A.3, EnsemblGenomes-Gn:WBGene00012810, EnsemblGenomes-Tr:Y43F8A.3a, GI:62954541, GOA:Q9XWL5, InterPro:IPR013094, InterPro:IPR017157, InterPro:IPR029058, nceh-1, UniProtKB/TrEMBL:Q9XWL5, WormBase:WBGene00012810		2.4285	169.783	0.48065	5.05253	4.35992e-07	3.8039e-06
RCEA014585	BX284602	C32D5.11	C32D5.11, CCD66039.1, CELE_C32D5.11, EnsemblGenomes-Gn:WBGene00016318, EnsemblGenomes-Tr:C32D5.11, GI:351058577, GOA:Q18355, InterPro:IPR001841, InterPro:IPR013083, InterPro:IPR017907, InterPro:IPR025654, UniProtKB/TrEMBL:Q18355, WormBase:WBGene00016318		2.42727	927.787	0.439185	5.52676	3.26192e-08	3.73339e-07
RCEA018623	BX284602	samp-1	CAA90140.1, CELE_T24F1.2, EnsemblGenomes-Gn:WBGene00011994, EnsemblGenomes-Tr:T24F1.2, GI:3880127, GOA:Q22747, InterPro:IPR018617, samp-1, UniProtKB/TrEMBL:Q22747, WormBase:WBGene00011994		2.42696	1072.63	0.405201	5.98951	2.10469e-09	3.13418e-08
RCEA024439	BX284603	ska-3	CCD61770.1, CELE_F54E7.8, EnsemblGenomes-Gn:WBGene00018830, EnsemblGenomes-Tr:F54E7.8, GI:373218592, ska-3, UniProtKB/TrEMBL:Q9BI86, WormBase:WBGene00018830		2.42468	222.855	0.521696	4.64769	3.3568e-06	2.36955e-05
RCEA006599	BX284601	Y106G6H.6	CAB63342.2, CELE_Y106G6H.6, GI:31441953, InterPro:IPR011990, UniProtKB/TrEMBL:Q9U2Z4, WormBase:WBGene00013719, Y106G6H.6		2.42402	246.883	0.627384	3.8637	0.000111681	0.000520613
RCEA077045	BX284605	C37C3.1	C37C3.1, CCD66939.1, CELE_C37C3.1, GI:351059086, GOA:H2KZ84, InterPro:IPR012816, UniProtKB/TrEMBL:H2KZ84, WormBase:WBGene00016495		2.42287	143.368	0.632056	3.83331	0.00012643	0.000581638
RCEA026429	BX284603	cyy-1	CCD73201.1, CELE_ZK353.1, cyy-1, EnsemblGenomes-Gn:WBGene00022697, EnsemblGenomes-Tr:ZK353.1b, GI:351064714, WormBase:WBGene00022697	Thioredoxin	2.42175	298.196	0.46607	5.19611	2.035e-07	1.95404e-06
RCEA001820	BX284601	Y47G6A.25	CCD72570.1, CELE_Y47G6A.25, EnsemblGenomes-Gn:WBGene00021649, EnsemblGenomes-Tr:Y47G6A.25, GI:373220170, UniProtKB/TrEMBL:Q9N3R6, WormBase:WBGene00021649, Y47G6A.25		2.42097	87.4121	0.718849	3.36784	0.000757585	0.00276243
RCEA004747	BX284601	H05L14.2	CAB16922.3, CELE_H05L14.2, EnsemblGenomes-Gn:WBGene00010367, EnsemblGenomes-Tr:H05L14.2, GI:193248207, GOA:G5EFL4, H05L14.2, InterPro:IPR001841, InterPro:IPR013083, UniProtKB/TrEMBL:G5EFL4, WormBase:WBGene00010367		2.42053	103.742	0.781111	3.09883	0.00194289	0.00628399
RCEA022711	BX284603	H06I04.1	CCD72247.1, CELE_H06I04.1, GI:351063956, H06I04.1, UniProtKB/TrEMBL:Q9N5N7, WormBase:WBGene00019167		2.41964	80.8576	0.779828	3.10278	0.00191711	0.00620858
RCEA024278	BX284603	F48E8.4	CCD71517.1, CELE_F48E8.4, EnsemblGenomes-Gn:WBGene00018611, EnsemblGenomes-Tr:F48E8.4, F48E8.4, GI:373254469, GOA:Q09396, InterPro:IPR012913, UniProtKB/TrEMBL:Q09396, WormBase:WBGene00018611		2.41951	613.991	0.619079	3.90824	9.29716e-05	0.000442841
RCEA002762	BX284601	spd-5	CCD66432.1, CELE_F56A3.4, EnsemblGenomes-Gn:WBGene00004955, EnsemblGenomes-Tr:F56A3.4, GI:373219198, spd-5, WormBase:WBGene00004955		2.41666	1440.18	0.593312	4.07317	4.63773e-05	0.000241325
RCEA029973	BX284604	eri-1	CCD73976.1, CELE_T07A9.5, eri-1, GI:351064943, WormBase:WBGene00001332		2.41665	237.021	0.582213	4.15079	3.3133e-05	0.000179144
RCEA023642	BX284603	F35G12.5	CELE_F35G12.5, CTQ86569.1, F35G12.5, GI:919007400, UniProtKB/TrEMBL:A0A0K3AU45, WormBase:WBGene00009442		2.41649	126.688	0.790066	3.05859	0.00222383	0.00706093
RCEA007239	BX284601	F56G4.4	CAB04486.1, CELE_F56G4.4, EnsemblGenomes-Gn:WBGene00010159, EnsemblGenomes-Tr:F56G4.4, F56G4.4, GI:3877758, GOA:Q9XUY1, InterPro:IPR003604, UniProtKB/TrEMBL:Q9XUY1, WormBase:WBGene00010159		2.41371	294.731	0.487858	4.94756	7.51491e-07	6.21504e-06
RCEA001915	BX284601	ptr-2	CCD66407.1, CELE_C32E8.8, EnsemblGenomes-Gn:WBGene00004217, EnsemblGenomes-Tr:C32E8.8, GI:373254104, GOA:P91129, InterPro:IPR000731, InterPro:IPR001036, InterPro:IPR003392, ptr-2, UniProtKB/TrEMBL:P91129, WormBase:WBGene00004217	Hypothetical membrane spanning protein	2.41283	1121.34	0.423324	5.69972	1.20008e-08	1.53416e-07
RCEA021162	BX284603	attf-3	attf-3, CCD66089.1, CELE_F54C4.3, EnsemblGenomes-Gn:WBGene00018794, EnsemblGenomes-Tr:F54C4.3a, GI:351058602, GOA:G4S460, InterPro:IPR007087, InterPro:IPR015880, InterPro:IPR017956, UniProtKB/TrEMBL:G4S460, WormBase:WBGene00018794		2.41099	237.584	0.488378	4.93674	7.94401e-07	6.5341e-06
RCEA028953	BX284603	tim-1	CAA22106.3, CELE_Y75B8A.22, EnsemblGenomes-Gn:WBGene00006571, EnsemblGenomes-Tr:Y75B8A.22.1, EnsemblGenomes-Tr:Y75B8A.22.2, GI:29603364, tim-1, WormBase:WBGene00006571		2.41095	382.445	0.616588	3.91015	9.22379e-05	0.000440598
RCEA029533	BX284603	T28A8.6	CAB07289.1, CELE_T28A8.6, EnsemblGenomes-Gn:WBGene00012112, EnsemblGenomes-Tr:T28A8.6, GI:3880339, InterPro:IPR006570, T28A8.6, UniProtKB/TrEMBL:Q9XU04, WormBase:WBGene00012112		2.41039	161.454	0.633568	3.80446	0.000142112	0.00064127
RCEA017102	BX284602	C01G6.5	C01G6.5, CAA84636.1, CELE_C01G6.5, EnsemblGenomes-Gn:WBGene00007227, EnsemblGenomes-Tr:C01G6.5, GI:3873858, WormBase:WBGene00007227		2.40857	1158.58	0.52475	4.58994	4.43379e-06	3.0319e-05
RCEA076829	BX284605	ets-6	CCD67760.1, CELE_F19F10.10, EnsemblGenomes-Gn:WBGene00017606, EnsemblGenomes-Tr:F19F10.10, ets-6, GI:373219399, GOA:O01525, InterPro:IPR012337, UniProtKB/TrEMBL:O01525, WormBase:WBGene00017606		2.40613	267.596	0.522994	4.60068	4.21115e-06	2.90069e-05
RCEA081323	BX284605	T04H1.2	CAB01578.1, CELE_T04H1.2, EnsemblGenomes-Gn:WBGene00011449, EnsemblGenomes-Tr:T04H1.2.1, EnsemblGenomes-Tr:T04H1.2.2, GI:3879422, GOA:Q22174, InterPro:IPR009000, InterPro:IPR009001, InterPro:IPR027417, T04H1.2, UniProtKB/TrEMBL:Q22174, WormBase:WBGene00011449	GTP-binding protein	2.40592	1107.32	0.538542	4.46748	7.91473e-06	5.06335e-05
RCEA024116	BX284603	ulp-1	CCD72868.1, CELE_T10F2.3, EnsemblGenomes-Gn:WBGene00006736, EnsemblGenomes-Tr:T10F2.3, GI:373220268, ulp-1, WormBase:WBGene00006736		2.40391	504.379	0.520172	4.62138	3.81189e-06	2.65477e-05
RCEA003921	BX284601	unc-37	CCD68992.1, CELE_W02D3.9, EnsemblGenomes-Gn:WBGene00006773, EnsemblGenomes-Tr:W02D3.9.1, EnsemblGenomes-Tr:W02D3.9.2, GI:351061229, unc-37, WormBase:WBGene00006773		2.40189	492.273	0.373207	6.43581	1.22815e-10	2.39983e-09
RCEA043387	BX284604	zim-3	CAB05278.2, CELE_T07G12.11, EnsemblGenomes-Gn:WBGene00011601, EnsemblGenomes-Tr:T07G12.11a, GI:332078428, GOA:O18065, InterPro:IPR015880, UniProtKB/TrEMBL:O18065, WormBase:WBGene00011601, zim-3		2.39901	123.075	0.774871	3.09601	0.00196145	0.00633178
RCEA000919	BX284601	Y20F4.4	CCD73418.2, CELE_Y20F4.4, GI:526478008, UniProtKB/TrEMBL:Q95XA7, WormBase:WBGene00021239, Y20F4.4		2.39823	134.01	0.580328	4.13253	3.58784e-05	0.000192402
RCEA043879	BX284604	klc-1	CCG28235.1, CELE_M7.2, EnsemblGenomes-Gn:WBGene00002214, EnsemblGenomes-Tr:M7.2b, GI:379657056, GOA:H9G2T2, InterPro:IPR002151, InterPro:IPR011990, InterPro:IPR013026, InterPro:IPR019734, klc-1, UniProtKB/TrEMBL:H9G2T2, WormBase:WBGene00002214		2.3974	410.929	0.701877	3.4157	0.000636174	0.0023773
RCEA003179	BX284601	C32F10.4	C32F10.4, CCD61909.1, CELE_C32F10.4, EnsemblGenomes-Gn:WBGene00016332, EnsemblGenomes-Tr:C32F10.4, GI:351065895, GOA:O01681, UniProtKB/TrEMBL:O01681, WormBase:WBGene00016332		2.39718	1520.8	0.541217	4.42924	9.45662e-06	5.94388e-05
RCEA002301	BX284601	C41D11.9	C41D11.9, CCD64258.1, CELE_C41D11.9, EnsemblGenomes-Gn:WBGene00016567, EnsemblGenomes-Tr:C41D11.9, GI:373253978, WormBase:WBGene00016567		2.39615	58.1366	0.978183	2.44959	0.0143019	0.0345025
RCEA044092	BX284604	B0035.6	B0035.6, CAA97420.1, CELE_B0035.6, EnsemblGenomes-Gn:WBGene00007109, EnsemblGenomes-Tr:B0035.6, GI:3873711, GOA:Q17436, UniProtKB/TrEMBL:Q17436, WormBase:WBGene00007109		2.39604	623.185	0.483008	4.96066	7.02558e-07	5.88782e-06
RCEA003363	BX284601	ZK484.4	CCD65800.1, CELE_ZK484.4, EnsemblGenomes-Gn:WBGene00022750, EnsemblGenomes-Tr:ZK484.4a, GI:351058354, GOA:Q95X55, InterPro:IPR026153, UniProtKB/TrEMBL:Q95X55, WormBase:WBGene00022750, ZK484.4		2.39448	611.436	0.611553	3.9154	9.02537e-05	0.000431667
RCEA031899	BX284604	algn-14	algn-14, CDH92984.1, CELE_M02B7.4, EnsemblGenomes-Gn:WBGene00019725, EnsemblGenomes-Tr:M02B7.4b, GI:548932248, GOA:U4PE03, InterPro:IPR013969, UniProtKB/TrEMBL:U4PE03, WormBase:WBGene00019725	Beta-1,4-galactosyltransferase accessory protein	2.39221	156.31	0.633707	3.77495	0.00016004	0.000711943
RCEA020883	BX284602	osta-3	CAB05639.1, CELE_W01D2.5, EnsemblGenomes-Gn:WBGene00012182, EnsemblGenomes-Tr:W01D2.5a.1, EnsemblGenomes-Tr:W01D2.5a.2, GI:3880422, osta-3, WormBase:WBGene00012182		2.39194	367.37	0.555838	4.30331	1.68267e-05	9.91529e-05
RCEA082432	BX284605	mes-4	CAA16276.2, CELE_Y2H9A.1, EnsemblGenomes-Gn:WBGene00003222, EnsemblGenomes-Tr:Y2H9A.1, GI:14530603, mes-4, WormBase:WBGene00003222		2.38745	355.469	0.494474	4.82825	1.37735e-06	1.06551e-05
RCEA008302	BX284601	B0019.2	B0019.2, CAA15508.3, CELE_B0019.2, EnsemblGenomes-Gn:WBGene00007094, EnsemblGenomes-Tr:B0019.2, GI:193247771, GOA:G5EBL4, InterPro:IPR006570, InterPro:IPR009057, UniProtKB/TrEMBL:G5EBL4, WormBase:WBGene00007094		2.38655	212.887	0.513732	4.64551	3.39236e-06	2.39018e-05
RCEA044893	BX284604	B0001.7	B0001.7, CCG28073.1, CELE_B0001.7, GI:379657075, UniProtKB/TrEMBL:H9G2U9, WormBase:WBGene00007092		2.38616	198.747	0.541423	4.4072	1.04714e-05	6.48177e-05
RCEA085329	BX284605	Y32B12B.4	CAA21009.2, CELE_Y32B12B.4, GI:92084865, UniProtKB/TrEMBL:Q9XX31, WormBase:WBGene00012524, Y32B12B.4		2.38321	217.842	0.602217	3.9574	7.57715e-05	0.000371591
RCEA023633	BX284603	sel-5	CAA86326.1, CELE_F35G12.3, EnsemblGenomes-Gn:WBGene00004762, EnsemblGenomes-Tr:F35G12.3a, GI:3876714, GOA:G5ECQ3, InterPro:IPR000719, InterPro:IPR008271, InterPro:IPR011009, sel-5, UniProtKB/TrEMBL:G5ECQ3, WormBase:WBGene00004762		2.38269	592.339	0.462129	5.1559	2.52418e-07	2.349e-06
RCEA099599	BX284606	tbc-1	CAB01744.2, CELE_F20D1.2, EnsemblGenomes-Gn:WBGene00008974, EnsemblGenomes-Tr:F20D1.2, GI:22265808, InterPro:IPR000195, InterPro:IPR001763, tbc-1, UniProtKB/TrEMBL:Q93534, WormBase:WBGene00008974		2.38175	483.958	0.375409	6.34441	2.23286e-10	4.09766e-09
RCEA002276	BX284601	dhc-1	CCD64267.1, CELE_T21E12.4, dhc-1, EnsemblGenomes-Gn:WBGene00000962, EnsemblGenomes-Tr:T21E12.4, GI:351050129, WormBase:WBGene00000962	Dynein heavy chain	2.37854	1775.73	0.397184	5.98851	2.11778e-09	3.15056e-08
RCEA018255	BX284602	orc-2	CAA85415.1, CELE_F59E10.1, EnsemblGenomes-Gn:WBGene00003882, EnsemblGenomes-Tr:F59E10.1, GI:3877976, orc-2, WormBase:WBGene00003882		2.37778	250.521	0.397378	5.98367	2.18169e-09	3.23606e-08
RCEA024644	BX284603	bcl-7	bcl-7, CCD65961.1, CELE_C28H8.1, EnsemblGenomes-Gn:WBGene00016192, EnsemblGenomes-Tr:C28H8.1, GI:351058499, WormBase:WBGene00016192		2.3764	192.449	0.612997	3.8767	0.000105884	0.000497125
RCEA000422	BX284601	Y95B8A.8	CCD73557.1, CELE_Y95B8A.8, EnsemblGenomes-Gn:WBGene00022388, EnsemblGenomes-Tr:Y95B8A.8, GI:351051178, GOA:E9RKC7, InterPro:IPR003604, InterPro:IPR006561, InterPro:IPR007087, InterPro:IPR015880, UniProtKB/TrEMBL:E9RKC7, WormBase:WBGene00022388, Y95B8A.8	ZINC FINGER RNA BINDING PROTEIN	2.37526	635.613	0.410765	5.78252	7.35886e-09	9.80639e-08
RCEA043871	BX284604	Y5F2A.4	CAA21647.1, CELE_Y5F2A.4, EnsemblGenomes-Gn:WBGene00012385, EnsemblGenomes-Tr:Y5F2A.4, GI:3881165, GOA:Q9XWL0, InterPro:IPR007087, InterPro:IPR013087, InterPro:IPR015880, InterPro:IPR027775, UniProtKB/TrEMBL:Q9XWL0, WormBase:WBGene00012385, Y5F2A.4		2.37439	237.181	0.647957	3.66442	0.000247902	0.0010408
RCEA040558	BX284604	F55G1.6	CCD69394.1, CELE_F55G1.6, EnsemblGenomes-Gn:WBGene00018902, EnsemblGenomes-Tr:F55G1.6, F55G1.6, GI:351061538, GOA:Q20846, InterPro:IPR001841, InterPro:IPR013083, UniProtKB/TrEMBL:Q20846, WormBase:WBGene00018902		2.37431	400.806	0.465782	5.09746	3.44232e-07	3.102e-06
RCEA006576	BX284601	maph-1.2	CAP59526.1, CELE_F25D7.4, EnsemblGenomes-Gn:WBGene00009113, EnsemblGenomes-Tr:F25D7.4, GI:163263182, maph-1.2, UniProtKB/TrEMBL:A9UJN7, WormBase:WBGene00009113		2.37369	2519.54	0.642189	3.69625	0.000218804	0.000934238
RCEA024167	BX284603	sumv-1	CCD66652.1, CELE_C34E10.8, EnsemblGenomes-Gn:WBGene00016409, EnsemblGenomes-Tr:C34E10.8, GI:351058866, sumv-1, WormBase:WBGene00016409		2.37302	254.727	0.588194	4.03442	5.47379e-05	0.000278302
RCEA094363	BX284606	C39D10.6	C39D10.6, CCD63856.1, CELE_C39D10.6, EnsemblGenomes-Gn:WBGene00016533, EnsemblGenomes-Tr:C39D10.6, GI:351049808, GOA:Q18527, InterPro:IPR004687, InterPro:IPR018400, UniProtKB/TrEMBL:Q18527, WormBase:WBGene00016533		2.3716	42.3412	1.0176	2.33059	0.0197751	0.0452872
RCEA016422	BX284602	M05D6.2	CAA91410.2, CELE_M05D6.2, EnsemblGenomes-Gn:WBGene00010875, EnsemblGenomes-Tr:M05D6.2, GI:218607627, InterPro:IPR008862, M05D6.2, UniProtKB/TrEMBL:G5ECL1, WormBase:WBGene00010875		2.3711	335.149	0.643174	3.68656	0.000227303	0.00096615
RCEA027399	BX284603	tlk-1	CAD45580.2, CELE_C07A9.3, EnsemblGenomes-Gn:WBGene00006579, EnsemblGenomes-Tr:C07A9.3b, GI:44893809, tlk-1, WormBase:WBGene00006579		2.37057	1378.46	0.286847	8.26421	1.40628e-16	8.83908e-15
RCEA014869	BX284602	T19D12.4	CCD71842.1, CELE_T19D12.4, GI:351063631, GOA:O76836, InterPro:IPR002035, T19D12.4, UniProtKB/TrEMBL:O76836, WormBase:WBGene00020579		2.36893	3863.2	0.587288	4.03368	5.49099e-05	0.000278988
RCEA013132	BX284602	F26G1.2	CCD65854.1, CELE_F26G1.2, EnsemblGenomes-Gn:WBGene00017838, EnsemblGenomes-Tr:F26G1.2a, F26G1.2, GI:351058412, UniProtKB/TrEMBL:H2KZ20, WormBase:WBGene00017838		2.36853	194.422	0.69089	3.42823	0.000607535	0.00228602
RCEA022990	BX284603	sel-8	CAC42265.1, CELE_C32A3.1, EnsemblGenomes-Gn:WBGene00004765, EnsemblGenomes-Tr:C32A3.1a, GI:14530355, sel-8, WormBase:WBGene00004765		2.36686	136.858	0.657361	3.60054	0.000317556	0.00129644
RCEA005006	BX284601	lin-28	CAB61008.1, CELE_F02E9.2, GI:6434275, lin-28, WormBase:WBGene00003014		2.36557	547.577	0.503087	4.70212	2.57479e-06	1.86824e-05
RCEA087975	BX284605	ftr-1	CAB54326.1, CELE_Y113G7B.4, ftr-1, GI:5824692, InterPro:IPR001810, InterPro:IPR002900, UniProtKB/TrEMBL:G5EC06, WormBase:WBGene00013756		2.36509	130.097	0.506739	4.66728	3.0522e-06	2.17387e-05
RCEA005516	BX284601	chaf-1	CAB63306.1, CELE_T06D10.2, chaf-1, EnsemblGenomes-Gn:WBGene00011532, EnsemblGenomes-Tr:T06D10.2, GI:6580235, GOA:Q9U380, InterPro:IPR022043, UniProtKB/TrEMBL:Q9U380, WormBase:WBGene00011532		2.36502	442.895	0.703705	3.36082	0.000777117	0.00282212
RCEA079018	BX284605	hpo-40	CAA94860.2, CELE_ZK856.12, EnsemblGenomes-Gn:WBGene00014113, EnsemblGenomes-Tr:ZK856.12.1, EnsemblGenomes-Tr:ZK856.12.2, GI:148472860, hpo-40, UniProtKB/TrEMBL:Q23647, WormBase:WBGene00014113		2.36447	190.524	0.581054	4.06928	4.71592e-05	0.000244653
RCEA083557	BX284605	set-5	CAA99796.4, CELE_C47E8.8, EnsemblGenomes-Gn:WBGene00008145, EnsemblGenomes-Tr:C47E8.8a, GI:345109078, InterPro:IPR001214, InterPro:IPR006570, set-5, UniProtKB/TrEMBL:G5EEE4, WormBase:WBGene00008145		2.36444	80.0038	0.67883	3.48311	0.000495624	0.0019141
RCEA049032	BX284604	lst-4	CAA19487.2, CELE_Y37A1B.2, GI:24817571, lst-4, WormBase:WBGene00003086	Putative nexin sorting protein with PX domain	2.36428	1460.98	0.352813	6.70121	2.06704e-11	4.71729e-10
RCEA021511	BX284603	dagl-2	CCD61889.1, CELE_F42G9.6, dagl-2, EnsemblGenomes-Gn:WBGene00018364, EnsemblGenomes-Tr:F42G9.6b, GI:373218621, GOA:H2KY93, InterPro:IPR002921, InterPro:IPR029058, UniProtKB/TrEMBL:H2KY93, WormBase:WBGene00018364		2.36332	764.637	0.348959	6.7725	1.26576e-11	3.01753e-10
RCEA008105	BX284601	hmg-20	CAB03465.1, CELE_W02D9.3, EnsemblGenomes-Gn:WBGene00012209, EnsemblGenomes-Tr:W02D9.3, GI:3880408, GOA:Q9XVG8, hmg-20, InterPro:IPR009071, UniProtKB/TrEMBL:Q9XVG8, WormBase:WBGene00012209		2.36276	89.1168	0.524714	4.50294	6.70191e-06	4.38414e-05
RCEA025994	BX284603	ZK688.9	CCD62545.1, CELE_ZK688.9, EnsemblGenomes-Gn:WBGene00022803, EnsemblGenomes-Tr:ZK688.9, GI:351020569, WormBase:WBGene00022803, ZK688.9	Hypothetical protein	2.36263	361.561	0.411241	5.74513	9.18521e-09	1.20381e-07
RCEA084376	BX284605	F28F8.7	CAB03010.1, CELE_F28F8.7, EnsemblGenomes-Gn:WBGene00009224, EnsemblGenomes-Tr:F28F8.7, F28F8.7, GI:3876462, InterPro:IPR000949, UniProtKB/TrEMBL:O18691, WormBase:WBGene00009224		2.36243	143.749	0.599809	3.93863	8.19481e-05	0.000397655
RCEA016459	BX284602	rnh-2	CAC70103.1, CELE_T13H5.7, EnsemblGenomes-Gn:WBGene00004383, EnsemblGenomes-Tr:T13H5.7, GI:15718212, rnh-2, WormBase:WBGene00004383		2.35923	163.281	0.59573	3.96022	7.48799e-05	0.000367936
RCEA075979	BX284605	gon-14	CCD71205.1, CELE_F44C4.4, EnsemblGenomes-Gn:WBGene00002148, EnsemblGenomes-Tr:F44C4.4a, GI:351063164, GOA:H2L033, gon-14, InterPro:IPR008906, InterPro:IPR012337, UniProtKB/TrEMBL:H2L033, WormBase:WBGene00002148		2.35883	430.471	0.371622	6.3474	2.18985e-10	4.03344e-09
RCEA028400	BX284603	fbxa-128	CAB55092.1, CELE_Y47D3A.2, EnsemblGenomes-Gn:WBGene00012923, EnsemblGenomes-Tr:Y47D3A.2, fbxa-128, GI:5832857, InterPro:IPR002900, UniProtKB/TrEMBL:Q9U2D3, WormBase:WBGene00012923		2.3575	79.4798	0.672448	3.50584	0.000455164	0.00177972
RCEA017749	BX284602	ZK945.4	CAA88438.3, CELE_ZK945.4, EnsemblGenomes-Gn:WBGene00014166, EnsemblGenomes-Tr:ZK945.4, GI:169402910, WormBase:WBGene00014166, ZK945.4		2.35747	42.8852	0.722549	3.26271	0.00110351	0.00382327
RCEA006276	BX284601	mom-5	CELE_T23D8.1, CTQ86376.1, GI:919006356, GOA:A0A0K3AWM6, mom-5, UniProtKB/TrEMBL:A0A0K3AWM6, WormBase:WBGene00003397		2.35643	618.847	0.516086	4.56597	4.97193e-06	3.36783e-05
RCEA096537	BX284606	pgp-5	CAA94202.2, CELE_C05A9.1, GI:198447228, GOA:Q17645, InterPro:IPR003439, InterPro:IPR003593, InterPro:IPR011527, InterPro:IPR017871, InterPro:IPR027417, pgp-5, UniProtKB/TrEMBL:Q17645, WormBase:WBGene00003999	Multidrug resistance ABC transporter ATP-binding and permease protein	2.35571	171.875	0.661622	3.5605	0.000370144	0.00148461
RCEA045857	BX284604	Y67H2A.10	CAD89753.2, CELE_Y67H2A.10, GI:118140642, GOA:Q86DA8, InterPro:IPR007087, InterPro:IPR013087, InterPro:IPR015880, UniProtKB/TrEMBL:Q86DA8, WormBase:WBGene00013465, Y67H2A.10		2.355	218.252	0.497192	4.73661	2.17319e-06	1.6015e-05
RCEA041543	BX284604	F08B4.3	CELE_F08B4.3, F08B4.3		2.35433	50.3133	0.924179	2.54748	0.0108503	0.0274212
RCEA030848	BX284604	Y76B12C.6	CDH93387.1, CELE_Y76B12C.6, EnsemblGenomes-Gn:WBGene00022300, EnsemblGenomes-Tr:Y76B12C.6b, GI:548932377, UniProtKB/TrEMBL:U4PBZ1, WormBase:WBGene00022300, Y76B12C.6		2.35332	260.749	0.471765	4.98834	6.09005e-07	5.18444e-06
RCEA039636	BX284604	C17H12.11	C17H12.11, CCD65000.2, CELE_C17H12.11, EnsemblGenomes-Gn:WBGene00015936, EnsemblGenomes-Tr:C17H12.11.1, EnsemblGenomes-Tr:C17H12.11.2, EnsemblGenomes-Tr:C17H12.11.3, GI:563403450, GOA:O45082, InterPro:IPR000472, UniProtKB/TrEMBL:O45082, WormBase:WBGene00015936		2.35106	232.991	0.521845	4.50529	6.6281e-06	4.34717e-05
RCEA016531	BX284602	F28C6.4	CAA92675.2, CELE_F28C6.4, EnsemblGenomes-Gn:WBGene00009204, EnsemblGenomes-Tr:F28C6.4a.1, EnsemblGenomes-Tr:F28C6.4a.2, EnsemblGenomes-Tr:F28C6.4a.3, F28C6.4, GI:37619820, GOA:Q19870, InterPro:IPR002591, InterPro:IPR017849, InterPro:IPR017850, UniProtKB/TrEMBL:Q19870, WormBase:WBGene00009204		2.34997	68.7425	0.913961	2.57119	0.010135	0.0259526
RCEA016115	BX284602	K02C4.3	CAA87786.3, CELE_K02C4.3, EnsemblGenomes-Gn:WBGene00010502, EnsemblGenomes-Tr:K02C4.3, GI:371570786, K02C4.3, WormBase:WBGene00010502		2.34862	507.998	0.572581	4.10182	4.09918e-05	0.00021621
RCEA005238	BX284601	cle-1	CAD56563.2, CELE_C36B1.1, cle-1, EnsemblGenomes-Gn:WBGene00000527, EnsemblGenomes-Tr:C36B1.1d, GI:51591868, GOA:G5EGA4, InterPro:IPR001791, InterPro:IPR003961, InterPro:IPR010515, InterPro:IPR013320, InterPro:IPR013783, InterPro:IPR016186, InterPro:IPR016187, UniProtKB/TrEMBL:G5EGA4, WormBase:WBGene00000527		2.34831	294.944	0.626973	3.74547	0.000180053	0.000789335
RCEA074792	BX284605	C04F5.9	C04F5.9, CCD63019.1, CELE_C04F5.9, EnsemblGenomes-Gn:WBGene00015451, EnsemblGenomes-Tr:C04F5.9, GI:351021012, GOA:Q9GZC9, InterPro:IPR007087, InterPro:IPR013087, InterPro:IPR015880, UniProtKB/TrEMBL:Q9GZC9, WormBase:WBGene00015451		2.34748	78.7049	0.71049	3.30404	0.000953034	0.00336057
RCEA000899	BX284601	Y51F10.11	CCD73480.2, CELE_Y51F10.11, EnsemblGenomes-Gn:WBGene00044438, EnsemblGenomes-Tr:Y51F10.11, GI:606211290, GOA:Q4W5H0, InterPro:IPR010876, UniProtKB/TrEMBL:Q4W5H0, WormBase:WBGene00044438, Y51F10.11		2.34721	71.4124	0.639885	3.66817	0.000244289	0.00102891
RCEA082093	BX284605	far-3	CAB01422.1, CELE_F15B9.1, EnsemblGenomes-Gn:WBGene00001387, EnsemblGenomes-Tr:F15B9.1, far-3, GI:3875959, GOA:Q19478, InterPro:IPR008632, UniProtKB/TrEMBL:Q19478, WormBase:WBGene00001387		2.34717	977.166	0.57734	4.06549	4.79316e-05	0.00024847
RCEA020620	BX284602	dsb-2	CBI83233.1, CELE_F26H11.6, dsb-2, EnsemblGenomes-Gn:WBGene00194892, EnsemblGenomes-Tr:F26H11.6, GI:283475190, GOA:D2Y8W2, UniProtKB/TrEMBL:D2Y8W2, WormBase:WBGene00194892		2.34681	148.459	0.599216	3.91646	8.98578e-05	0.000429909
RCEA018807	BX284602	mdt-8	CAB57912.1, CELE_Y62F5A.1, GI:6018414, mdt-8, WormBase:WBGene00007013		2.34355	316.89	0.481951	4.86263	1.15836e-06	9.15339e-06
RCEA021170	BX284603	F54C4.4	CCD66088.1, CELE_F54C4.4, EnsemblGenomes-Gn:WBGene00018795, EnsemblGenomes-Tr:F54C4.4, F54C4.4, GI:351058601, UniProtKB/TrEMBL:Q9TZ91, WormBase:WBGene00018795		2.34339	32.0944	0.945031	2.4797	0.0131493	0.0321435
RCEA019929	BX284602	hpr-17	CAB04224.1, CELE_F32A11.2, EnsemblGenomes-Gn:WBGene00001998, EnsemblGenomes-Tr:F32A11.2, GI:3876586, GOA:G5EGG2, hpr-17, InterPro:IPR004582, InterPro:IPR027417, UniProtKB/TrEMBL:G5EGG2, WormBase:WBGene00001998		2.339	121.624	0.61375	3.811	0.000138404	0.000627918
RCEA031398	BX284604	Y54G2A.73	CDH92960.1, CELE_Y54G2A.73, EnsemblGenomes-Gn:WBGene00219425, EnsemblGenomes-Tr:Y54G2A.73a, GI:548932447, UniProtKB/TrEMBL:U4PB43, WormBase:WBGene00219425, Y54G2A.73		2.33796	70.8231	0.799925	2.92272	0.00346984	0.0103485
RCEA027593	BX284603	cyld-1	CAF31477.2, CELE_F40F12.5, cyld-1, GI:51011769, GOA:Q7JMS4, InterPro:IPR000938, InterPro:IPR001394, InterPro:IPR028889, UniProtKB/TrEMBL:Q7JMS4, WormBase:WBGene00009594		2.33629	1769.85	0.35964	6.49621	8.23689e-11	1.67007e-09
RCEA084143	BX284605	ZK1037.6	CAB03505.1, CELE_ZK1037.6, EnsemblGenomes-Gn:WBGene00014194, EnsemblGenomes-Tr:ZK1037.6, GI:3881467, GOA:O45988, InterPro:IPR003366, UniProtKB/TrEMBL:O45988, WormBase:WBGene00014194, ZK1037.6		2.33366	135.472	0.598761	3.89747	9.72014e-05	0.000460661
RCEA028459	BX284603	smc-3	CAQ48406.1, CELE_Y47D3A.26, EnsemblGenomes-Gn:WBGene00004873, EnsemblGenomes-Tr:Y47D3A.26b, GI:186929457, smc-3, WormBase:WBGene00004873	Chromosome segregation protein SMC2	2.33254	403.208	0.629436	3.70576	0.000210761	0.000905789
RCEA032755	BX284604	ubxn-6	CCD72219.1, CELE_H06H21.6, EnsemblGenomes-Gn:WBGene00019163, EnsemblGenomes-Tr:H06H21.6.1, EnsemblGenomes-Tr:H06H21.6.2, EnsemblGenomes-Tr:H06H21.6.3, EnsemblGenomes-Tr:H06H21.6.4, GI:373254516, InterPro:IPR001012, InterPro:IPR006567, InterPro:IPR018997, InterPro:IPR029071, ubxn-6, UniProtKB/TrEMBL:Q8WTJ4, WormBase:WBGene00019163		2.3324	1538.74	0.47041	4.95823	7.11384e-07	5.95518e-06
RCEA011497	BX284602	pqn-42	CCD71700.1, CELE_F53G2.4, EnsemblGenomes-Gn:WBGene00004129, EnsemblGenomes-Tr:F53G2.4b, GI:351063523, pqn-42, UniProtKB/TrEMBL:H2L066, WormBase:WBGene00004129		2.33208	92.3045	0.657506	3.54686	0.000389858	0.00155253
RCEA025319	BX284603	brc-2	brc-2, CCD72025.1, CELE_T07E3.5, EnsemblGenomes-Gn:WBGene00020316, EnsemblGenomes-Tr:T07E3.5, GI:351063806, GOA:G5EG86, InterPro:IPR012340, UniProtKB/TrEMBL:G5EG86, WormBase:WBGene00020316		2.32994	160.635	0.642806	3.62465	0.000289355	0.00119391
RCEA025697	BX284603	hmg-4	CCD69078.1, CELE_T20B12.8, EnsemblGenomes-Gn:WBGene00001974, EnsemblGenomes-Tr:T20B12.8, GI:351061300, hmg-4, WormBase:WBGene00001974		2.32792	702.039	0.561972	4.14241	3.43669e-05	0.000184954
RCEA015456	BX284602	puf-8	CCD66262.1, CELE_C30G12.7, EnsemblGenomes-Gn:WBGene00004244, EnsemblGenomes-Tr:C30G12.7, GI:351065107, GOA:Q09487, InterPro:IPR001313, InterPro:IPR011989, InterPro:IPR016024, puf-8, UniProtKB/TrEMBL:Q09487, WormBase:WBGene00004244		2.32747	427.953	0.637252	3.65235	0.000259854	0.00108524
RCEA029850	BX284604	R02D3.8	CCD73172.1, CELE_R02D3.8, EnsemblGenomes-Gn:WBGene00019825, EnsemblGenomes-Tr:R02D3.8, GI:351064690, GOA:Q9TZZ9, InterPro:IPR012337, InterPro:IPR013520, R02D3.8, UniProtKB/TrEMBL:Q9TZZ9, WormBase:WBGene00019825	Exonuclease KapD	2.32302	280.131	0.421825	5.50707	3.64854e-08	4.1258e-07
RCEA023135	BX284603	brc-1	brc-1, CAR97812.1, CELE_C36A4.8, GI:211970417, GOA:B6VQ60, InterPro:IPR001357, InterPro:IPR001841, InterPro:IPR013083, InterPro:IPR017907, InterPro:IPR031099, UniProtKB/TrEMBL:B6VQ60, WormBase:WBGene00000264	DNA REPAIR AND RECOMBINATION PROTEIN BRCA1	2.32189	114.631	0.773253	3.00276	0.00267546	0.00827885
RCEA009440	BX284601	hinf-1	CAB07382.2, CELE_F39B2.1, EnsemblGenomes-Gn:WBGene00009553, EnsemblGenomes-Tr:F39B2.1, GI:371571182, GOA:O45494, hinf-1, InterPro:IPR007087, InterPro:IPR013087, InterPro:IPR015880, UniProtKB/TrEMBL:O45494, WormBase:WBGene00009553		2.31959	494.897	0.41577	5.57903	2.4187e-08	2.86848e-07
RCEA031628	BX284604	dyf-3	CCD62199.1, CELE_C04C3.5, dyf-3, GI:351018265, WormBase:WBGene00001119		2.3176	83.0754	0.877347	2.6416	0.00825166	0.0216895
RCEA075547	BX284605	F17A9.2	CCD69355.1, CELE_F17A9.2, EnsemblGenomes-Gn:WBGene00017534, EnsemblGenomes-Tr:F17A9.2, F17A9.2, GI:373219670, WormBase:WBGene00017534	Hypothetical protein	2.31452	525.402	0.417806	5.53971	3.02967e-08	3.50736e-07
RCEA074228	BX284605	Y45G5AM.7	CCD74326.1, CELE_Y45G5AM.7, EnsemblGenomes-Gn:WBGene00021559, EnsemblGenomes-Tr:Y45G5AM.7, GI:351051226, UniProtKB/TrEMBL:Q95XJ5, WormBase:WBGene00021559, Y45G5AM.7		2.31362	242.75	0.626992	3.69003	0.000224229	0.000954969
RCEA006891	BX284601	F55A3.3	CCD66831.1, CELE_F55A3.3, EnsemblGenomes-Gn:WBGene00018849, EnsemblGenomes-Tr:F55A3.3, F55A3.3, GI:373219292, WormBase:WBGene00018849	Cell division control protein 68	2.31196	2182.38	0.349886	6.60775	3.90196e-11	8.46922e-10
RCEA059539	BX284604	tag-349	CAB70234.1, CELE_Y73F8A.34, GI:6782303, GOA:Q9NA31, InterPro:IPR002867, InterPro:IPR031127, tag-349, UniProtKB/TrEMBL:Q9NA31, WormBase:WBGene00013538	ZINC FINGER PROTEIN, C3HC4 TYPE (RING FINGER)	2.31081	1089.71	0.442177	5.22599	1.73228e-07	1.68481e-06
RCEA100115	BX284606	K09E9.3	CAB01890.1, CELE_K09E9.3, EnsemblGenomes-Gn:WBGene00010726, EnsemblGenomes-Tr:K09E9.3, GI:3878495, GOA:Q93879, K09E9.3, UniProtKB/TrEMBL:Q93879, WormBase:WBGene00010726		2.30987	83.3866	0.638652	3.6168	0.000298272	0.00122467
RCEA030657	BX284604	Y41D4B.15	CCD66728.2, CELE_Y41D4B.15, EnsemblGenomes-Gn:WBGene00021517, EnsemblGenomes-Tr:Y41D4B.15, GI:358246661, InterPro:IPR005071, UniProtKB/TrEMBL:Q95Y16, WormBase:WBGene00021517, Y41D4B.15		2.30985	20.124	0.95545	2.41755	0.0156255	0.0371725
RCEA007012	BX284601	impt-1	CAA21718.1, CELE_Y52B11A.2, GI:3881158, impt-1, WormBase:WBGene00013122	Hypothetical cytosolic protein	2.30982	96.478	0.755331	3.05803	0.002228	0.00707119
RCEA026223	BX284603	C50C3.1	C50C3.1, CCD66128.1, CELE_C50C3.1, EnsemblGenomes-Gn:WBGene00016799, EnsemblGenomes-Tr:C50C3.1, GI:351058634, WormBase:WBGene00016799		2.30955	182.672	0.641138	3.60226	0.000315462	0.00128963
RCEA014487	BX284602	T24H7.2	CCD66143.1, CELE_T24H7.2, EnsemblGenomes-Gn:WBGene00020781, EnsemblGenomes-Tr:T24H7.2, GI:351058651, GOA:Q22758, InterPro:IPR013126, InterPro:IPR029048, T24H7.2, UniProtKB/TrEMBL:Q22758, WormBase:WBGene00020781	Heat shock protein 70	2.30649	2360.51	0.52733	4.37389	1.22049e-05	7.42384e-05
RCEA000291	BX284601	eme-1	CCD71918.1, CELE_F56A6.4, eme-1, GI:351065922, GOA:Q9GZG5, UniProtKB/TrEMBL:Q9GZG5, WormBase:WBGene00018923	Hypothetical protein	2.30585	286.886	0.577351	3.99384	6.50124e-05	0.000324417
RCEA005550	BX284601	mel-26	CCO25606.1, CELE_ZK858.4, EnsemblGenomes-Gn:WBGene00003209, EnsemblGenomes-Tr:ZK858.4b, GI:413003999, InterPro:IPR000210, InterPro:IPR002083, InterPro:IPR008974, InterPro:IPR011333, mel-26, UniProtKB/TrEMBL:K8F7T2, WormBase:WBGene00003209		2.30478	610.489	0.47084	4.89505	9.82814e-07	7.92594e-06
RCEA003167	BX284601	glh-3	CCD61900.1, CELE_B0414.6, EnsemblGenomes-Gn:WBGene00001600, EnsemblGenomes-Tr:B0414.6, GI:351065885, glh-3, WormBase:WBGene00001600		2.30297	160.21	0.439316	5.24216	1.58704e-07	1.55965e-06
RCEA003860	BX284601	ZC581.3	CCD64900.1, CELE_ZC581.3, EnsemblGenomes-Gn:WBGene00022633, EnsemblGenomes-Tr:ZC581.3, GI:351050365, GOA:O01772, UniProtKB/TrEMBL:O01772, WormBase:WBGene00022633, ZC581.3		2.30256	286.234	0.857694	2.6846	0.0072617	0.0194087
RCEA018444	BX284602	nasp-1	CAA90441.1, CELE_C09H10.6, EnsemblGenomes-Gn:WBGene00007500, EnsemblGenomes-Tr:C09H10.6, GI:3874224, InterPro:IPR011990, InterPro:IPR019544, InterPro:IPR019734, nasp-1, UniProtKB/TrEMBL:Q17886, WormBase:WBGene00007500		2.30256	644.643	0.478785	4.80917	1.51556e-06	1.1617e-05
RCEA027213	BX284603	B0464.6	B0464.6, CAA79539.2, CELE_B0464.6, EnsemblGenomes-Gn:WBGene00007186, EnsemblGenomes-Tr:B0464.6.1, EnsemblGenomes-Tr:B0464.6.2, GI:30424328, WormBase:WBGene00007186		2.30089	1132.76	0.345242	6.66459	2.65401e-11	5.95771e-10
RCEA026403	BX284603	met-2	CCD73198.2, CELE_R05D3.11, EnsemblGenomes-Gn:WBGene00019883, EnsemblGenomes-Tr:R05D3.11, GI:412983630, met-2, WormBase:WBGene00019883		2.30023	325.516	0.633691	3.62989	0.000283538	0.00117247
RCEA003215	BX284601	hpo-3	CCD66443.1, CELE_F33D11.9, GI:351058713, GOA:Q95X60, hpo-3, InterPro:IPR007246, UniProtKB/TrEMBL:Q95X60, WormBase:WBGene00018006		2.29891	562.709	0.44622	5.15196	2.57777e-07	2.39739e-06
RCEA004659	BX284601	apb-3	apb-3, CAB05598.3, CELE_R11A5.1, EnsemblGenomes-Gn:WBGene00000163, EnsemblGenomes-Tr:R11A5.1a, GI:371571163, GOA:O45718, InterPro:IPR002553, InterPro:IPR011989, InterPro:IPR016024, InterPro:IPR026739, InterPro:IPR026740, InterPro:IPR029390, UniProtKB/TrEMBL:O45718, WormBase:WBGene00000163		2.29711	718.232	0.524099	4.38297	1.17073e-05	7.14709e-05
RCEA032747	BX284604	dpf-7	CCD72245.1, CELE_R11E3.7, dpf-7, EnsemblGenomes-Gn:WBGene00001060, EnsemblGenomes-Tr:R11E3.7a, GI:373220120, InterPro:IPR015943, InterPro:IPR029058, UniProtKB/TrEMBL:H2L0B1, WormBase:WBGene00001060		2.29638	164.04	0.538007	4.26831	1.96963e-05	0.000113926
RCEA076329	BX284605	C33G8.2	C33G8.2, CCD66526.1, CELE_C33G8.2, EnsemblGenomes-Gn:WBGene00016360, EnsemblGenomes-Tr:C33G8.2, GI:351058749, UniProtKB/TrEMBL:Q18401, WormBase:WBGene00016360		2.29632	129.345	0.60511	3.79487	0.000147718	0.000662403
RCEA008502	BX284601	C17H1.7	C17H1.7, CAB07171.1, CELE_C17H1.7, EnsemblGenomes-Gn:WBGene00007660, EnsemblGenomes-Tr:C17H1.7, GI:3874479, InterPro:IPR026674, UniProtKB/TrEMBL:O45258, WormBase:WBGene00007660		2.29439	35.6742	0.948609	2.41869	0.0155764	0.037085
RCEA025343	BX284603	F57B9.3	CCD70306.2, CELE_F57B9.3, EnsemblGenomes-Gn:WBGene00018997, EnsemblGenomes-Tr:F57B9.3, F57B9.3, GI:919007416, GOA:Q20935, InterPro:IPR000629, InterPro:IPR001650, InterPro:IPR011545, InterPro:IPR014001, InterPro:IPR014014, InterPro:IPR027417, UniProtKB/TrEMBL:Q20935, WormBase:WBGene00018997	Protein Translation Initiation Factor 4A (EC 3.6.4.13)	2.29406	50.0797	0.855426	2.68177	0.00732341	0.0195446
RCEA013780	BX284602	ZK177.8	CCD64860.1, CELE_ZK177.8, GI:351050320, WormBase:WBGene00022673, ZK177.8		2.2934	872.535	0.620773	3.69443	0.000220385	0.000940454
RCEA080735	BX284605	ape-1	ape-1, CAB03115.1, CELE_F46F3.4, EnsemblGenomes-Gn:WBGene00000146, EnsemblGenomes-Tr:F46F3.4a, GI:3877221, WormBase:WBGene00000146		2.29302	877.409	0.547727	4.18643	2.8338e-05	0.000156299
RCEA082506	BX284605	C56A3.4	C56A3.4, CAB01133.2, CELE_C56A3.4, EnsemblGenomes-Gn:WBGene00008343, EnsemblGenomes-Tr:C56A3.4a, GI:58081775, GOA:Q18875, InterPro:IPR001841, InterPro:IPR013083, UniProtKB/TrEMBL:Q18875, WormBase:WBGene00008343		2.29278	174.763	0.507058	4.52172	6.13393e-06	4.05835e-05
RCEA020587	BX284602	mes-2	CAB05589.2, CELE_R06A4.7, EnsemblGenomes-Gn:WBGene00003220, EnsemblGenomes-Tr:R06A4.7, GI:14530536, mes-2, WormBase:WBGene00003220		2.29047	283.757	0.489242	4.68168	2.84539e-06	2.04297e-05
RCEA042604	BX284604	sre-4	CAB03356.3, CELE_T13F2.5, EnsemblGenomes-Gn:WBGene00011745, EnsemblGenomes-Tr:T13F2.5, GI:60222933, GOA:Q94048, InterPro:IPR004151, sre-4, UniProtKB/TrEMBL:Q94048, WormBase:WBGene00011745		2.29043	30.2883	0.857706	2.67041	0.00757588	0.0201307
RCEA028062	BX284603	T21C12.8	CAI06050.5, CELE_T21C12.8, GI:295982005, GOA:Q5CZ45, T21C12.8, UniProtKB/TrEMBL:Q5CZ45, WormBase:WBGene00043998		2.28504	44.2129	0.708554	3.22493	0.00126003	0.00429581
RCEA038835	BX284604	Y73B6BL.23	CCD74170.1, CELE_Y73B6BL.23, EnsemblGenomes-Gn:WBGene00022244, EnsemblGenomes-Tr:Y73B6BL.23, GI:351059327, UniProtKB/TrEMBL:Q95XC9, WormBase:WBGene00022244, Y73B6BL.23		2.28254	264.027	0.682174	3.34599	0.000819905	0.00295467
RCEA098967	BX284606	F28H6.4	CAA20934.2, CELE_F28H6.4, EnsemblGenomes-Gn:WBGene00009233, EnsemblGenomes-Tr:F28H6.4, F28H6.4, GI:5824475, GOA:Q9U3H5, InterPro:IPR006570, InterPro:IPR009057, UniProtKB/TrEMBL:Q9U3H5, WormBase:WBGene00009233		2.282	123.833	0.721659	3.16216	0.00156602	0.00519652
RCEA081200	BX284605	C13C4.7	C13C4.7, CAE17713.2, CELE_C13C4.7, EnsemblGenomes-Gn:WBGene00007551, EnsemblGenomes-Tr:C13C4.7, GI:148472928, GOA:Q7YTR4, InterPro:IPR000907, InterPro:IPR001024, UniProtKB/TrEMBL:Q7YTR4, WormBase:WBGene00007551		2.27836	31.4288	0.962597	2.36689	0.0179384	0.0416887
RCEA032119	BX284604	C35B1.4	C35B1.4, CCD66739.1, CELE_C35B1.4, EnsemblGenomes-Gn:WBGene00016434, EnsemblGenomes-Tr:C35B1.4.1, EnsemblGenomes-Tr:C35B1.4.2, GI:373219258, UniProtKB/TrEMBL:O45058, WormBase:WBGene00016434		2.27744	796.259	0.925672	2.46031	0.0138818	0.0336613
RCEA099048	BX284606	K04C1.3	CAA94210.1, CELE_K04C1.3, EnsemblGenomes-Gn:WBGene00010553, EnsemblGenomes-Tr:K04C1.3, GI:3878247, GOA:Q21202, InterPro:IPR001766, InterPro:IPR015880, K04C1.3, UniProtKB/TrEMBL:Q21202, WormBase:WBGene00010553		2.27667	44.9759	0.843011	2.70064	0.00692069	0.0186526
RCEA026850	BX284603	ZK643.2	CAA77473.1, CELE_ZK643.2, EnsemblGenomes-Gn:WBGene00014034, EnsemblGenomes-Tr:ZK643.2, GI:3881681, WormBase:WBGene00014034, ZK643.2	Deoxycytidylate deaminase (EC 3.5.4.12)	2.27661	108.03	0.733517	3.10369	0.00191122	0.00619616
RCEA001562	BX284601	ztf-23	CCD72994.1, CELE_Y54E10BR.8, EnsemblGenomes-Gn:WBGene00021846, EnsemblGenomes-Tr:Y54E10BR.8, GI:351064551, GOA:Q9N3C6, InterPro:IPR007087, InterPro:IPR013087, InterPro:IPR015880, UniProtKB/TrEMBL:Q9N3C6, WormBase:WBGene00021846, ztf-23		2.27439	104.228	0.847726	2.68293	0.00729794	0.0194848
RCEA018889	BX284602	F54D5.2	CAA91329.3, CELE_F54D5.2, EnsemblGenomes-Gn:WBGene00010048, EnsemblGenomes-Tr:F54D5.2, F54D5.2, GI:50507716, UniProtKB/TrEMBL:Q20768, WormBase:WBGene00010048		2.27359	254.936	0.682672	3.33042	0.000867147	0.0031055
RCEA027491	BX284603	ZK632.2	CAA80179.1, CELE_ZK632.2, EnsemblGenomes-Gn:WBGene00014011, EnsemblGenomes-Tr:ZK632.2, GI:3881693, WormBase:WBGene00014011, ZK632.2		2.27321	228.353	0.569148	3.99405	6.49539e-05	0.000324339
RCEA090269	BX284606	Y41G9A.10	CCD74426.1, CELE_Y41G9A.10, EnsemblGenomes-Gn:WBGene00044901, EnsemblGenomes-Tr:Y41G9A.10, GI:373220565, UniProtKB/TrEMBL:Q14T75, WormBase:WBGene00044901, Y41G9A.10		2.27292	261.552	0.622765	3.64972	0.000262523	0.00109436
RCEA026616	BX284603	twk-7	CCD62137.1, CELE_F22B7.7, EnsemblGenomes-Gn:WBGene00006662, EnsemblGenomes-Tr:F22B7.7, GI:373253813, twk-7, WormBase:WBGene00006662		2.27259	88.0773	0.831741	2.73233	0.0062889	0.0171987
RCEA023515	BX284603	cku-80	CAA83623.1, CELE_R07E5.8, cku-80, EnsemblGenomes-Gn:WBGene00000520, EnsemblGenomes-Tr:R07E5.8.1, EnsemblGenomes-Tr:R07E5.8.2, GI:3878947, GOA:Q21829, InterPro:IPR002035, InterPro:IPR005160, InterPro:IPR006164, InterPro:IPR014893, InterPro:IPR016194, InterPro:IPR024193, UniProtKB/TrEMBL:Q21829, WormBase:WBGene00000520		2.27254	330.762	0.537578	4.22737	2.3644e-05	0.000133135
RCEA035963	BX284604	perm-5	CCD68148.1, CELE_C55C3.5, EnsemblGenomes-Gn:WBGene00016955, EnsemblGenomes-Tr:C55C3.5, GI:351060485, GOA:Q18867, InterPro:IPR017943, perm-5, UniProtKB/TrEMBL:Q18867, WormBase:WBGene00016955		2.2719	366.993	0.721033	3.15089	0.00162773	0.00538001
RCEA030966	BX284604	M70.4	CCD66977.1, CELE_M70.4, EnsemblGenomes-Gn:WBGene00019786, EnsemblGenomes-Tr:M70.4a, GI:351059128, InterPro:IPR029044, M70.4, UniProtKB/TrEMBL:Q688B0, WormBase:WBGene00019786		2.27166	273.961	0.354364	6.41051	1.45029e-10	2.80124e-09
RCEA029544	BX284603	mlh-1	CAB07283.2, CELE_T28A8.7, EnsemblGenomes-Gn:WBGene00003373, EnsemblGenomes-Tr:T28A8.7, GI:33668505, GOA:Q9XU10, InterPro:IPR002099, InterPro:IPR003594, InterPro:IPR013507, InterPro:IPR014721, InterPro:IPR014762, InterPro:IPR020568, InterPro:IPR032189, mlh-1, UniProtKB/TrEMBL:Q9XU10, WormBase:WBGene00003373	DNA mismatch repair protein Mlh1	2.27081	886.502	0.512056	4.43469	9.22069e-06	5.81254e-05
RCEA081338	BX284605	tbb-6	CAB01587.2, CELE_T04H1.9, EnsemblGenomes-Gn:WBGene00006539, EnsemblGenomes-Tr:T04H1.9, GI:50507756, GOA:G5EF01, InterPro:IPR000217, InterPro:IPR002453, InterPro:IPR003008, InterPro:IPR008280, InterPro:IPR017975, InterPro:IPR018316, InterPro:IPR023123, tbb-6, UniProtKB/TrEMBL:G5EF01, WormBase:WBGene00006539		2.26973	235.809	0.442719	5.1268	2.94705e-07	2.70415e-06
RCEA095471	BX284606	ttr-38	CCD70597.1, CELE_F35G8.2, EnsemblGenomes-Gn:WBGene00044788, EnsemblGenomes-Tr:F35G8.2, GI:351062585, GOA:Q1W0R1, InterPro:IPR001534, ttr-38, UniProtKB/TrEMBL:Q1W0R1, WormBase:WBGene00044788		2.26943	63.6002	0.696531	3.25819	0.00112125	0.00387669
RCEA030651	BX284604	Y41D4B.18	CELE_Y41D4B.18, Y41D4B.18		2.26835	99.6513	0.699231	3.24407	0.00117837	0.00405352
RCEA008736	BX284601	Y87G2A.1	CAB60426.3, CELE_Y87G2A.1, EnsemblGenomes-Gn:WBGene00013593, EnsemblGenomes-Tr:Y87G2A.1, GI:109637988, UniProtKB/TrEMBL:Q9U1Q6, WormBase:WBGene00013593, Y87G2A.1		2.26651	257.244	0.445305	5.0898	3.58434e-07	3.21461e-06
RCEA082984	BX284605	D1086.10	CAQ16175.1, CELE_D1086.10, D1086.10, EnsemblGenomes-Gn:WBGene00044080, EnsemblGenomes-Tr:D1086.10c, GI:169402825, UniProtKB/TrEMBL:B1Q273, WormBase:WBGene00044080		2.26648	2468.61	0.690615	3.28183	0.00103135	0.00359806
RCEA016080	BX284602	arp-6	arp-6, CAA86667.3, CELE_C08B11.6, EnsemblGenomes-Gn:WBGene00007434, EnsemblGenomes-Tr:C08B11.6, GI:21615464, WormBase:WBGene00007434	Actin-like protein	2.26484	210.656	0.537186	4.21612	2.4854e-05	0.000139118
RCEA017371	BX284602	parp-2	CAA87379.1, CELE_E02H1.4, EnsemblGenomes-Gn:WBGene00004050, EnsemblGenomes-Tr:E02H1.4, GI:3875429, parp-2, WormBase:WBGene00004050		2.26345	384.025	0.530994	4.26266	2.02008e-05	0.000116353
[truncated: 5,202 more rows]
